# Supplementary material for: Access to enantioenriched 2,3- and 2,5-dihydrofurans with a fully substituted C2 stereocenter by Pd-catalyzed asymmetric intermolecular Heck reaction
Source: Royal Society of Chemistry journal article supplement (doi:10.1039/c5sc01460c), 2015-01-01

## Access to Enantioenriched 2,3- and 2,5-Dihydrofurans with a Fully Substituted C2 Stereocenter by Pd-Catalyzed Asymmetric Intermolecular Heck Reaction

Gustavo M. Borrajo-Calleja,<sup>a</sup> Vincent Bizet,<sup>a</sup> Thomas Bürgi,<sup>b</sup> Clément Mazet<sup>a,\*</sup>

<sup>a</sup>*Departement of Organic Chemistry, University of Geneva*

<sup>b</sup>*Departement of Physical Chemistry, University of Geneva  
Quai Ernest Ansermet 30, 1211 Geneva 4, Switzerland*

Email: Clement.Mazet@unige.ch

### Supporting Information

#### Table of Contents

|          |                                                                                                                                        |            |
|----------|----------------------------------------------------------------------------------------------------------------------------------------|------------|
| <b>1</b> | <b>General</b>                                                                                                                         | <b>S2</b>  |
| <b>2</b> | <b>Optimization of the asymmetric Heck reaction</b>                                                                                    | <b>S3</b>  |
| 2.1      | Reaction conditions optimization for 2-(4-methoxyphenyl)-2-methyl-2,5-dihydrofuran ( <b>3ab</b> )                                      | <b>S3</b>  |
| 2.2      | Ligand screening for 2-aryl-2-methyl-2,3-dihydrofurans                                                                                 | <b>S4</b>  |
| <b>3</b> | <b>Vibrational circular dichroism (VCD) measurements</b>                                                                               | <b>S8</b>  |
| 3.1      | ( <i>R</i> )-2-(4-methoxyphenyl)-2-methyl-2,5-dihydrofuran ( <b>3ab</b> )                                                              | <b>S9</b>  |
| 3.2      | ( <i>R</i> )-2-(4-ethoxycarbonylphenyl)-2-methyl-2,3-dihydrofuran ( <b>4ap</b> )                                                       | <b>S14</b> |
| <b>4</b> | <b>Experimental procedures and characterization data</b>                                                                               | <b>S19</b> |
| 4.1      | General procedure for the synthesis of 5-alkyl-2,3-dihydrofuran (in a 2-Me-THF solution) ( <b>GP1</b> )                                | <b>S19</b> |
| 4.2      | Procedures for the synthesis of 5-alkyl-2,3-dihydrofuran (neat)                                                                        | <b>S20</b> |
| 4.3      | General procedure for the asymmetric intermolecular Heck reaction with neat 5-alkyl-2,3-dihydrofurans ( <b>GP2</b> )                   | <b>S23</b> |
| 4.4      | General procedure for the asymmetric intermolecular Heck reaction with 5-alkyl-2,3-dihydrofurans in a 2-Me-THF solution ( <b>GP3</b> ) | <b>S23</b> |
| 4.5      | Characterization data of 2-aryl-2-methyl-2,5-dihydrofurans                                                                             | <b>S24</b> |
| 4.6      | Characterization data of 2-aryl-2-methyl-2,3-dihydrofurans                                                                             | <b>S35</b> |
| 4.7      | Characterization data of 2-alkyl-2-aryl-2,5-dihydrofurans                                                                              | <b>S42</b> |
| 4.8      | Characterization data of 2-alkyl-2-aryl-2,3-dihydrofurans                                                                              | <b>S48</b> |
| <b>5</b> | <b>NMR spectra of all compounds</b>                                                                                                    | <b>S55</b> |

## 1 General

All reactions were carried out under an inert atmosphere of nitrogen using either two-manifold vacuum/inert gas lines or a *M. Braun* glove-box, unless otherwise noted. Solvents were dried over activated alumina columns and further degassed by three successive "freeze-pump-thaw" cycles if necessary.

Unless otherwise noted, commercial reagents were purchased from *Aldrich*, *Acros* or *Strem* and used without further purification. Liquid reagents were transferred with stainless steel syringes or cannula. Thin layer chromatography (TLC) was performed on plates of silica precoated with 0.25 mm Kieselgel 60 F<sub>254</sub> from *Merck*. Flash chromatography was performed using silica gel SiliaFlash® P60 (230–400 mesh) from *Silicycle*. NMR spectra were recorded on ARX-300 and AMX-400 and AM-500 *Bruker Advance* spectrometers. <sup>1</sup>H and <sup>13</sup>C{<sup>1</sup>H} NMR chemical shifts are given in ppm relative to SiMe<sub>4</sub>, with the solvent resonance used as internal reference. <sup>19</sup>F{<sup>1</sup>H} NMR chemical shifts are reported in ppm relative to CFCl<sub>3</sub>. Infrared spectra were obtained on a *Perkin-Elmer* 1650 FT-IR spectrometer using neat samples on a diamond ATR Golden Gate sampler. The mass spectrometric data were obtained at the mass spectrometry facility of the University of Geneva (<http://www.ms.unige.ch/sms>). GC-MS analyses were performed on GC – HP 6890, column Agilent – HP1 (30 m – ID 0.32 mm, Film 0.25 μm) coupled with MS – HP 5973. The enantiomeric excesses (ee's) were determined by HPLC or GC analyses. HPLC analyses were performed on *Shimadzu* CTO-20AA, with column DAICEL OD-H, OJ-H, AD-H and IC. GC analyses were performed on HP – 6890, column Lipodex E, 50m. Retention times (t<sub>R</sub>) are given in minutes.

The aryl trifluoromethanesulfonates were prepared according to reported procedures.<sup>1</sup> (*R*)-Difluorophos was purchased from *Strem*, other chiral ligands were obtained from commercial sources. The homemade ligand (*R,R,R*) and (*S,S,S*)-**L1** were prepared according to a previous report.<sup>2</sup> The 5-methyl-2,3-dihydrofuran 97% (**1a**) was obtained from *Sigma-Aldrich* and used without further purification. The racemates of **3aa**, **3ab**, **3ad**, **3ae**, **3af**, **3ag**, **3ah**, **3ai**, **3aj** and **3al** were obtained using **GP2**, and for **3bb** using **GP3**, with 2-(2-(diphenylphosphino)phenyl)-4,5-dihydrooxazole as ligand.<sup>3</sup> The racemates of **3ak**, **3db**, **3eb**, **3fb** and **3gb** were obtained using **GP2**, and for **3cb** using **GP3**, with the racemic mixture (*R,R,R/S,S,S*)-**L1** as ligand.<sup>4</sup> The racemates of **4ac**, **4am**, **4an**, **4ao**, **4ap**, **4aq**, **4ar**, **4dc**, **4ec**, **4fc** and **4gc** were obtained using **GP2**, and for **4bc** and **4cc** using **GP3**, with *rac*-BINAP as ligand.

1 (a) L. Qin, X. Ren, Y. Lu, Y. Li and J. Zhou, *Angew. Chem. Int. Ed.*, 2012, **51**, 5915; (b) For 2-methylbenzo[d]thiazol-5-yl trifluoromethanesulfonate, see : E. V. Vinogradova, N. H. Park, B. P. Fors and S. L. Buchwald, *Org. Lett.*, 2013, **15**, 1394.

2 P. Nareddy, L. Mantilli, L. Guénée and C. Mazet, *Angew. Chem. Int. Ed.*, 2012, **51**, 1.

3 B. Wüstenberg and A. Pfaltz, *Adv. Synth. Catal.*, 2008, **350**, 174.

4 *Rac*-**L1** was obtained by mixing both enantiomers.

## 2 Optimization of the asymmetric Heck reaction

## 2.1 Reaction conditions optimization for 2-(4-methoxyphenyl)-2-methyl-2,5-dihydrofuran (3ab)

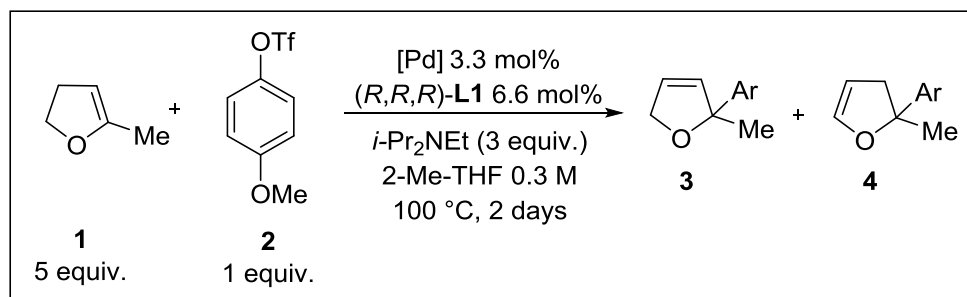

| Entry                    | Pd source                                             | Solvent           | Base                            | <b>3/4</b> <sup>a</sup> | <b>3</b> yield (%) <sup>b</sup> | <b>3</b> ee (%) <sup>c</sup> |
|--------------------------|-------------------------------------------------------|-------------------|---------------------------------|-------------------------|---------------------------------|------------------------------|
| <b>1</b>                 | Pd(OAc) <sub>2</sub>                                  | Toluene           | <i>i</i> -Pr <sub>2</sub> NEt   | 99/1                    | <i>nd</i> <sup>d</sup>          | <i>nd</i> <sup>d</sup>       |
| <b>2</b>                 | Pd(OAc) <sub>2</sub>                                  | THF               | <i>i</i> -Pr <sub>2</sub> NEt   | 99/1                    | 13                              | 93                           |
| <b>3</b>                 | Pd(OAc) <sub>2</sub>                                  | DMF               | <i>i</i> -Pr <sub>2</sub> NEt   | <i>nd</i> <sup>d</sup>  | 11                              | 93                           |
| <b>4</b>                 | Pd(OAc) <sub>2</sub>                                  | Dioxane           | <i>i</i> -Pr <sub>2</sub> NEt   | 99/1                    | 37                              | 94                           |
| <b>5</b>                 | Pd(OAc) <sub>2</sub>                                  | 2-Me-THF          | <i>i</i> -Pr <sub>2</sub> NEt   | 99/1                    | 52                              | 94                           |
| <b>6</b>                 | Pd(OAc) <sub>2</sub>                                  | TBME <sup>e</sup> | <i>i</i> -Pr <sub>2</sub> NEt   | <i>nd</i> <sup>d</sup>  | 5                               | 92                           |
| <b>7</b>                 | Pd(OAc) <sub>2</sub>                                  | CPME <sup>f</sup> | <i>i</i> -Pr <sub>2</sub> NEt   | <i>nd</i> <sup>d</sup>  | 4                               | 93                           |
| <b>8</b>                 | Pd(OAc) <sub>2</sub>                                  | BME <sup>g</sup>  | <i>i</i> -Pr <sub>2</sub> NEt   | <i>nr</i> <sup>h</sup>  | <i>nr</i> <sup>h</sup>          | <i>nr</i> <sup>h</sup>       |
| <b>9</b>                 | Pd(OAc) <sub>2</sub>                                  | 2-Me-THF          | PMP <sup>i</sup>                | 99/1                    | 15                              | 93                           |
| <b>10</b>                | Pd(OAc) <sub>2</sub>                                  | 2-Me-THF          | Li <sub>2</sub> CO <sub>3</sub> | <i>nr</i> <sup>h</sup>  | <i>nr</i> <sup>h</sup>          | <i>nr</i> <sup>h</sup>       |
| <b>11</b>                | Pd(OAc) <sub>2</sub>                                  | 2-Me-THF          | Urotropine                      | <i>nr</i> <sup>h</sup>  | <i>nr</i> <sup>h</sup>          | <i>nr</i> <sup>h</sup>       |
| <b>12</b>                | Pd(OAc) <sub>2</sub>                                  | 2-Me-THF          | DABCO <sup>j</sup>              | <i>nd</i> <sup>d</sup>  | 23                              | 92                           |
| <b>13</b> <sup>k</sup>   | Pd(OAc) <sub>2</sub>                                  | 2-Me-THF          | <i>i</i> -Pr <sub>2</sub> NEt   | 99/1                    | 56                              | 93                           |
| <b>14</b> <sup>l</sup>   | Pd(OAc) <sub>2</sub>                                  | 2-Me-THF          | <i>i</i> -Pr <sub>2</sub> NEt   | 99/1                    | 54                              | 93                           |
| <b>15</b> <sup>l,m</sup> | Pd(OAc) <sub>2</sub>                                  | 2-Me-THF          | <i>i</i> -Pr <sub>2</sub> NEt   | 99/1                    | 42                              | 93                           |
| <b>16</b> <sup>l,n</sup> | Pd(OAc) <sub>2</sub>                                  | 2-Me-THF          | <i>i</i> -Pr <sub>2</sub> NEt   | 99/1                    | 31                              | 93                           |
| <b>17</b> <sup>o</sup>   | Pd(OAc) <sub>2</sub>                                  | 2-Me-THF          | <i>i</i> -Pr <sub>2</sub> NEt   | <i>nd</i> <sup>d</sup>  | <i>nd</i> <sup>d</sup>          | 93                           |
| <b>18</b> <sup>l</sup>   | Pd(TFA) <sub>2</sub>                                  | 2-Me-THF          | <i>i</i> -Pr <sub>2</sub> NEt   | 99/1                    | 31                              | 93                           |
| <b>19</b> <sup>l</sup>   | Pd(Cl) <sub>2</sub> (CH <sub>3</sub> CN) <sub>2</sub> | 2-Me-THF          | <i>i</i> -Pr <sub>2</sub> NEt   | <i>nr</i> <sup>h</sup>  | <i>nr</i> <sup>h</sup>          | <i>nr</i> <sup>h</sup>       |
| <b>20</b> <sup>l</sup>   | Pd <sub>2</sub> (dba) <sub>3</sub>                    | 2-Me-THF          | <i>i</i> -Pr <sub>2</sub> NEt   | 99/1                    | 63                              | 92                           |
| <b>21</b> <sup>l,p</sup> | Pd <sub>2</sub> (dba) <sub>3</sub>                    | 2-Me-THF          | <i>i</i> -Pr <sub>2</sub> NEt   | 99/1                    | 58                              | 93                           |

<sup>a</sup> Determined by <sup>1</sup>H-NMR in the reaction crude; <sup>b</sup> Isolated yield; <sup>c</sup> Determined by HPLC; <sup>d</sup> Not determined; <sup>e</sup> *t*-butyl methyl ether; <sup>f</sup> Cyclopentyl methyl ether; <sup>g</sup> benzyl methyl ether; <sup>h</sup> No reaction; <sup>i</sup> 1,2,2,6,6-Pentamethylpiperidine; <sup>j</sup> 1,4-diazabicyclo[2.2.2]octane; <sup>k</sup> 72 h; <sup>l</sup> 5 mol% of Pd and 10 mol% of ligand; <sup>m</sup> 0.6 M and 30 h; <sup>n</sup> 0.15 M and 30 h; <sup>o</sup> 1.0 M; <sup>p</sup> 0.6 M.

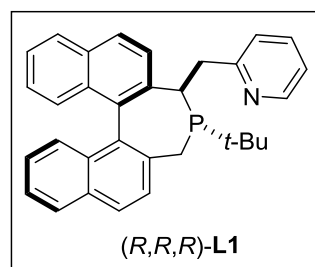

## 2.2 Ligand screening for 2-aryl-2-methyl-2,3-dihydrofurans

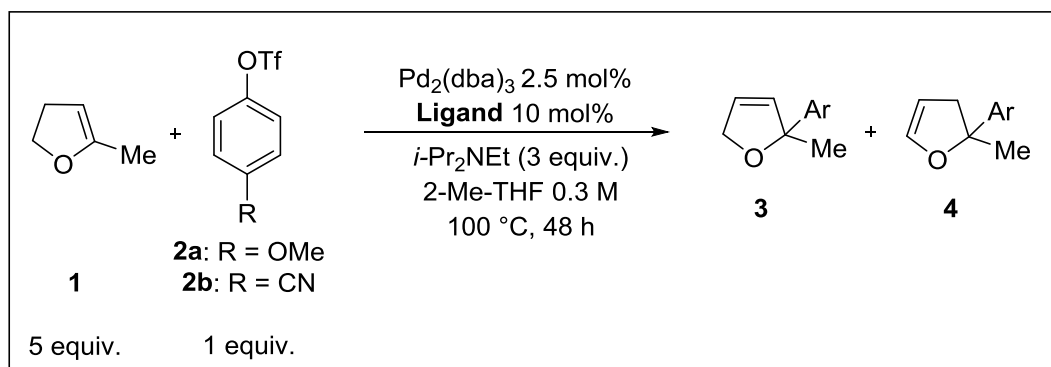

| Entry | <b>2</b> | <b>Ligand</b> | <b>2</b> cons. (%) <sup>a</sup> | <b>3:4</b> <sup>b</sup> | <b>3</b> yield (%) <sup>c</sup> | <b>3</b> ee (%) <sup>d</sup> | <b>4</b> yield (%) <sup>c</sup> | <b>4</b> ee (%) <sup>d</sup> |
|-------|----------|---------------|---------------------------------|-------------------------|---------------------------------|------------------------------|---------------------------------|------------------------------|
| 1     | 2a       | L1            | 97                              | 66/33                   | <i>nd</i> <sup>e</sup>          | <i>nd</i> <sup>e</sup>       | <i>nd</i> <sup>e</sup>          | <i>nd</i> <sup>e</sup>       |
| 2     | 2b       | L1            | 99                              | <i>nd</i> <sup>e</sup>  | <i>nd</i> <sup>e</sup>          | <i>nd</i> <sup>e</sup>       | <i>nd</i> <sup>e</sup>          | <i>nd</i> <sup>e</sup>       |
| 3     | 2a       | L2            | 33                              | 99/1                    | <i>nd</i> <sup>e</sup>          | <i>nd</i> <sup>e</sup>       | <i>nd</i> <sup>e</sup>          | <i>nd</i> <sup>e</sup>       |
| 4     | 2b       | L2            | 99                              | <i>nd</i> <sup>e</sup>  | <i>nd</i> <sup>e</sup>          | <i>nd</i> <sup>e</sup>       | <i>nd</i> <sup>e</sup>          | <i>nd</i> <sup>e</sup>       |
| 5     | 2a       | L3            | 0                               | <i>nr</i> <sup>f</sup>  | <i>nr</i> <sup>f</sup>          | <i>nr</i> <sup>f</sup>       | <i>nr</i> <sup>f</sup>          | <i>nr</i> <sup>f</sup>       |
| 6     | 2b       | L3            | 99                              | <i>nd</i> <sup>e</sup>  | <i>nd</i> <sup>e</sup>          | <i>nd</i> <sup>e</sup>       | 10                              | 36                           |
| 7     | 2a       | L4            | 0                               | <i>nr</i> <sup>f</sup>  | <i>nr</i> <sup>f</sup>          | <i>nr</i> <sup>f</sup>       | <i>nr</i> <sup>f</sup>          | <i>nr</i> <sup>f</sup>       |
| 8     | 2b       | L4            | 0                               | <i>nr</i> <sup>f</sup>  | <i>nr</i> <sup>f</sup>          | <i>nr</i> <sup>f</sup>       | <i>nr</i> <sup>f</sup>          | <i>nr</i> <sup>f</sup>       |
| 9     | 2a       | L5            | 7                               | <i>nr</i> <sup>f</sup>  | <i>nr</i> <sup>f</sup>          | <i>nr</i> <sup>f</sup>       | <i>nr</i> <sup>f</sup>          | <i>nr</i> <sup>f</sup>       |
| 10    | 2b       | L5            | 35                              | 10/90                   | <i>nd</i>                       | <i>nd</i>                    | 10                              | 85                           |
| 11    | 2a       | L6            | 5                               | <i>nr</i> <sup>f</sup>  | <i>nr</i> <sup>f</sup>          | <i>nr</i> <sup>f</sup>       | <i>nr</i> <sup>f</sup>          | <i>nr</i> <sup>f</sup>       |
| 12    | 2b       | L6            | 18                              | <i>nr</i> <sup>f</sup>  | <i>nr</i> <sup>f</sup>          | <i>nr</i> <sup>f</sup>       | <i>nr</i> <sup>f</sup>          | <i>nr</i> <sup>f</sup>       |
| 13    | 2a       | L7            | 0                               | <i>nr</i> <sup>f</sup>  | <i>nr</i> <sup>f</sup>          | <i>nr</i> <sup>f</sup>       | <i>nr</i> <sup>f</sup>          | <i>nr</i> <sup>f</sup>       |
| 14    | 2b       | L7            | 12                              | 10/90                   | <i>nd</i> <sup>e</sup>          | <i>nd</i> <sup>e</sup>       | <i>nd</i> <sup>e</sup>          | <i>nd</i> <sup>e</sup>       |
| 15    | 2a       | L8            | 15                              | 10/90                   | <i>nd</i> <sup>e</sup>          | <i>nd</i> <sup>e</sup>       | <i>nd</i> <sup>e</sup>          | <i>nd</i> <sup>e</sup>       |
| 16    | 2b       | L8            | 45                              | 5/95                    | <i>nd</i> <sup>e</sup>          | <i>nd</i> <sup>e</sup>       | 23                              | 31                           |
| 17    | 2a       | L9            | 99                              | 5/95                    | <i>nd</i> <sup>e</sup>          | <i>nd</i> <sup>e</sup>       | 39                              | 45                           |
| 18    | 2b       | L9            | 99                              | 10/90                   | <i>nd</i> <sup>e</sup>          | <i>nd</i> <sup>e</sup>       | 34                              | 51                           |
| 19    | 2a       | L10           | 92                              | 5/95                    | <i>nd</i> <sup>e</sup>          | <i>nd</i> <sup>e</sup>       | 30                              | 56                           |
| 20    | 2b       | L10           | 99                              | 5/95                    | <i>nd</i> <sup>e</sup>          | <i>nd</i> <sup>e</sup>       | 32                              | 62                           |
| 21    | 2a       | L11           | 99                              | <i>nr</i> <sup>f</sup>  | <i>nr</i> <sup>f</sup>          | <i>nr</i> <sup>f</sup>       | <i>nr</i> <sup>f</sup>          | <i>nr</i> <sup>f</sup>       |
| 22    | 2b       | L11           | 99                              | <i>nd</i>               | <i>nd</i> <sup>e</sup>          | <i>nd</i> <sup>e</sup>       | <i>nd</i> <sup>e</sup>          | <i>nd</i> <sup>e</sup>       |
| 23    | 2a       | L12           | 72                              | 10/90                   | <i>nd</i> <sup>e</sup>          | <i>nd</i> <sup>e</sup>       | 31                              | 75                           |
| 24    | 2b       | L12           | 99                              | 10/90                   | <i>nd</i> <sup>e</sup>          | <i>nd</i> <sup>e</sup>       | 38                              | 88                           |
| 25    | 2a       | L13           | 99                              | 7/93                    | <i>nd</i> <sup>e</sup>          | <i>nd</i> <sup>e</sup>       | 31                              | 52                           |
| 26    | 2b       | L13           | 75                              | 10/90                   | <i>nd</i> <sup>e</sup>          | <i>nd</i> <sup>e</sup>       | 35                              | 61                           |
| 27    | 2a       | L14           | 99                              | <i>nr</i> <sup>f</sup>  | <i>nr</i> <sup>f</sup>          | <i>nr</i> <sup>f</sup>       | <i>nr</i> <sup>f</sup>          | <i>nr</i> <sup>f</sup>       |
| 28    | 2b       | L14           | 99                              | <i>nr</i> <sup>f</sup>  | <i>nr</i> <sup>f</sup>          | <i>nr</i> <sup>f</sup>       | <i>nr</i> <sup>f</sup>          | <i>nr</i> <sup>f</sup>       |

<sup>a</sup> Consumption of ArOTf **2** determined by <sup>19</sup>F-NMR of the crude; <sup>b</sup> Determined by <sup>1</sup>H-NMR of the crude; <sup>c</sup> Isolated yield; <sup>d</sup> Determined by HPLC; <sup>e</sup> Not determined; <sup>f</sup> No reaction.

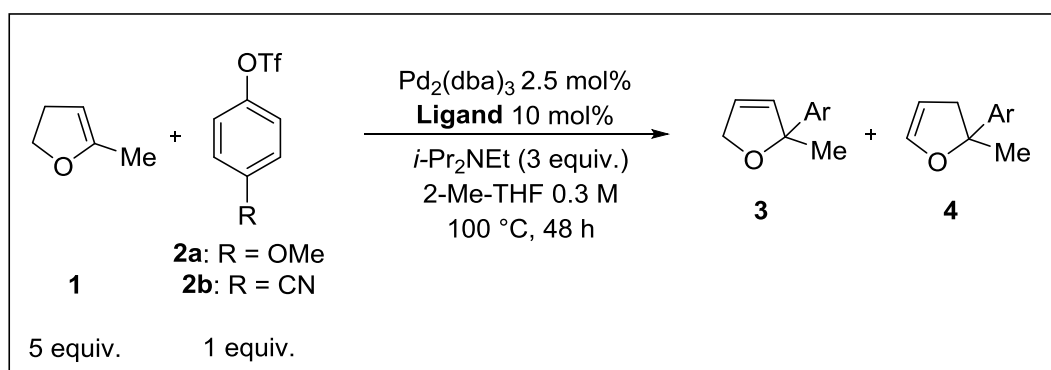

| Entry | <b>2</b> | <b>Ligand</b> | <b>2 cons. (%)<sup>a</sup></b> | <b>3:4<sup>b</sup></b> | <b>3 yield (%)<sup>c</sup></b> | <b>3 ee (%)<sup>d</sup></b> | <b>4 yield (%)<sup>c</sup></b> | <b>4 ee (%)<sup>d</sup></b> |
|-------|----------|---------------|--------------------------------|------------------------|--------------------------------|-----------------------------|--------------------------------|-----------------------------|
| 29    | 2a       | L15           | 99                             | 20/80                  | <i>nd<sup>e</sup></i>          | <i>nd<sup>e</sup></i>       | 19                             | 72                          |
| 30    | 2b       | L15           | 99                             | 20/80                  | <i>nd<sup>e</sup></i>          | <i>nd<sup>e</sup></i>       | 15                             | 78                          |
| 31    | 2a       | L16           | 99                             | <i>nd<sup>e</sup></i>  | <i>nd<sup>e</sup></i>          | <i>nd<sup>e</sup></i>       | 7                              | 86                          |
| 32    | 2b       | L16           | 99                             | <i>nr<sup>f</sup></i>  | <i>nr<sup>f</sup></i>          | <i>nr<sup>f</sup></i>       | <i>nr<sup>f</sup></i>          | <i>nr<sup>f</sup></i>       |
| 33    | 2a       | L17           | 99                             | <i>nd<sup>e</sup></i>  | <i>nd<sup>e</sup></i>          | <i>nd<sup>e</sup></i>       | 3                              | 53                          |
| 34    | 2b       | L17           | 99                             | <i>nd<sup>e</sup></i>  | <i>nd<sup>e</sup></i>          | <i>nd<sup>e</sup></i>       | <i>nd<sup>e</sup></i>          | 58                          |
| 35    | 2a       | L18           | 99                             | 5/95                   | <i>nd<sup>e</sup></i>          | <i>nd<sup>e</sup></i>       | 14                             | 68                          |
| 36    | 2b       | L18           | 99                             | <i>nr<sup>f</sup></i>  | <i>nr<sup>f</sup></i>          | <i>nr<sup>f</sup></i>       | <i>nr<sup>f</sup></i>          | <i>nr<sup>f</sup></i>       |
| 37    | 2a       | L19           | 99                             | 10/90                  | <i>nd<sup>e</sup></i>          | <i>nd<sup>e</sup></i>       | 12                             | 65                          |
| 38    | 2b       | L19           | 99                             | 5/95                   | <i>nd<sup>e</sup></i>          | <i>nd<sup>e</sup></i>       | 17                             | 73                          |
| 39    | 2a       | L20           | 72                             | 65/35                  | 17                             | 36                          | 13                             | 42                          |
| 40    | 2b       | L20           | 99                             | 10/90                  | 4                              | 64                          | 65                             | 78                          |
| 41    | 2a       | L21           | 97                             | 57/43                  | 42 <sup>g</sup>                | 17                          | 42 <sup>g</sup>                | 34                          |
| 42    | 2b       | L21           | 99                             | 10/90                  | 4                              | 35                          | 39                             | 14                          |
| 43    | 2a       | L22           | 99                             | 75/25                  | 48 <sup>g</sup>                | 69                          | 48 <sup>g</sup>                | 54                          |
| 44    | 2b       | L22           | 99                             | 10/90                  | <i>nd<sup>e</sup></i>          | <i>nd<sup>e</sup></i>       | 26                             | 69                          |
| 45    | 2a       | L23           | 98                             | 29/71                  | 10                             | 13                          | 14                             | 37                          |
| 46    | 2b       | L23           | 99                             | 15/85                  | <i>nd<sup>e</sup></i>          | <i>nd<sup>e</sup></i>       | 39                             | 69                          |
| 47    | 2a       | L24           | 99                             | 44/56                  | 21                             | 0                           | 28                             | 13                          |
| 48    | 2b       | L24           | 99                             | 5/95                   | <i>nd<sup>e</sup></i>          | <i>nd<sup>e</sup></i>       | 55                             | 93                          |
| 49    | 2a       | L25           | 51                             | 14/86                  | <i>nd<sup>e</sup></i>          | <i>nd<sup>e</sup></i>       | 10                             | 95                          |
| 50    | 2b       | L25           | 75                             | 15/85                  | <i>nd<sup>e</sup></i>          | <i>nd<sup>e</sup></i>       | 35                             | 97                          |
| 51    | 2a       | L26           | 99                             | 32/68                  | 10                             | 2                           | 31                             | 7                           |
| 52    | 2b       | L26           | 99                             | 30/70                  | 8                              | 13                          | 28                             | 38                          |
| 53    | 2a       | L27           | 24                             | 57/43                  | <i>nd<sup>e</sup></i>          | <i>nd<sup>e</sup></i>       | <i>nd<sup>e</sup></i>          | <i>nd<sup>e</sup></i>       |
| 54    | 2b       | L27           | 99                             | 5/95                   | <i>nd<sup>e</sup></i>          | <i>nd<sup>e</sup></i>       | 59                             | 97                          |
| 55    | 2a       | L28           | 66                             | 74/26                  | <i>nd<sup>e</sup></i>          | <i>nd<sup>e</sup></i>       | <i>nd<sup>e</sup></i>          | 35                          |
| 56    | 2b       | L28           | 99                             | 10/90                  | <i>nd<sup>e</sup></i>          | <i>nd<sup>e</sup></i>       | 41                             | 77                          |
| 57    | 2a       | L29           | 66                             | <i>nr<sup>f</sup></i>  | <i>nr<sup>f</sup></i>          | <i>nr<sup>f</sup></i>       | <i>nr<sup>f</sup></i>          | <i>nr<sup>f</sup></i>       |
| 58    | 2b       | L29           | 58                             | 10/90                  | <i>nd<sup>e</sup></i>          | <i>nd<sup>e</sup></i>       | <i>nd<sup>e</sup></i>          | 97                          |

<sup>a</sup> Consumption of ArOTf **2** by <sup>19</sup>F-NMR of the crude; <sup>b</sup> Determined by <sup>1</sup>H-NMR of the crude; <sup>c</sup> Isolated yield; <sup>d</sup> Determined by HPLC; <sup>e</sup> Not determined; <sup>f</sup> No reaction; <sup>g</sup> Combined isolated yield of **3** and **4**.

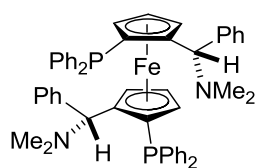**L1***(R)-(S)*-NMe<sub>2</sub>-PPh<sub>2</sub>-Mandyphos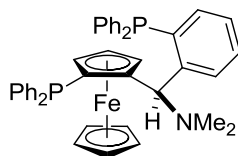**L2***(R)-(S)*-Ph<sub>2</sub>-PPhCHNMe<sub>2</sub>-T-PPh<sub>2</sub>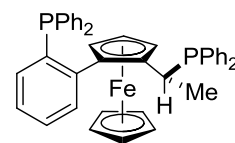**L3***(R)-(R)*-Ph<sub>2</sub>PPhFcCHCH<sub>3</sub>PPh<sub>2</sub>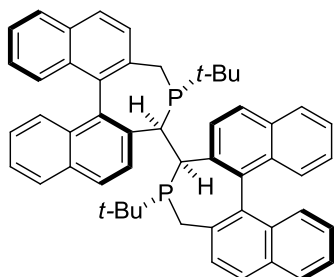**L4***(S)*-BINAPINE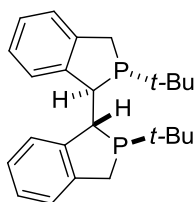**L5***(R,R,S,S)*-DUANPHOS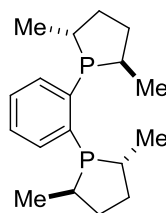**L6***(R,R)*-Me-DUPHOS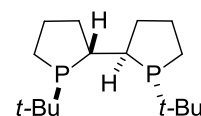**L7***(S,S,R,R)*-TANGPHOS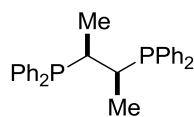**L8***(S,S)*-CHIRAPHOS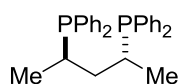**L9***(R,R)*-BDPP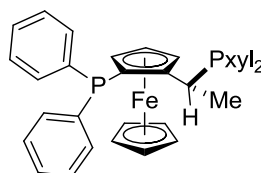**L10***(R)-(S)*-PPF-Pxyl<sub>2</sub>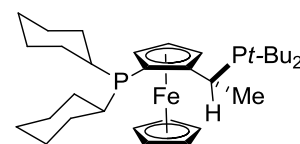**L11***(R)-(S)*-cy<sub>2</sub>PF-P<sup>t</sup>Bu<sub>2</sub>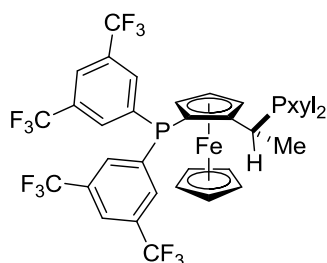**L12***(R)-(S)*-(3,5-CF<sub>3</sub>Ph)<sub>2</sub>-PF-Pxyl<sub>2</sub>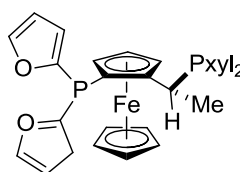**L13***(R)-(S)*-2-Fur<sub>2</sub>PF-Pxyl<sub>2</sub>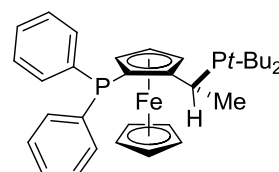**L14***(R)-(S)*-PPF-P<sup>t</sup>Bu<sub>2</sub>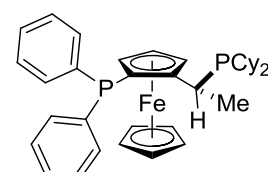**L15***(R)-(S)*-PPF-Pcy<sub>2</sub>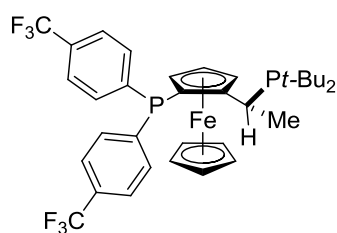**L16***(R)-(S)*-(4-CF<sub>3</sub>Ph)<sub>2</sub>-PF-P<sup>t</sup>Bu<sub>2</sub>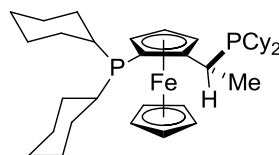**L17***(R)-(S)*-cy<sub>2</sub>PF-Pcy<sub>2</sub>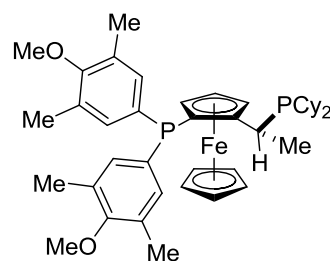**L18***(R)-(S)*-(4-MeO-3,5-MePh)<sub>2</sub>PF-Pcy<sub>2</sub>

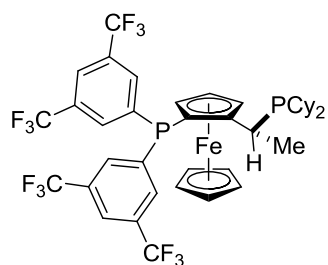

**L19**  
(*R*)-(*S*)-(3,5-CF<sub>3</sub>Ph)<sub>2</sub>PF-Pcy<sub>2</sub>

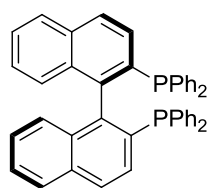

**L20**  
(*R*)-BINAP

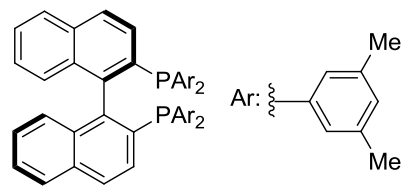

**L21**  
(*R*)-DM-BINAP

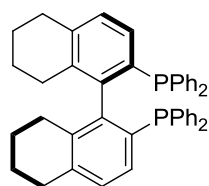

**L22**  
(*R*)-H<sub>8</sub>-BINAP

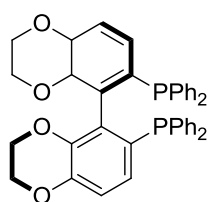

**L23**  
(*R*)-SYNPHOS

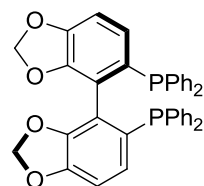

**L24**  
(*R*)-SEGPPOS

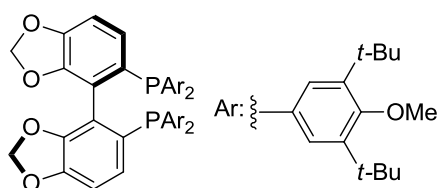

**L25**  
(*R*)-DTBM-SEGPPOS

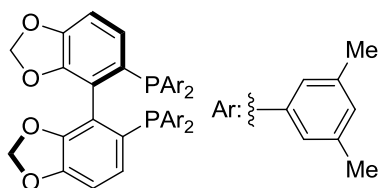

**L26**  
(*R*)-DM-SEGPPOS

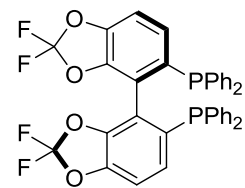

**L27**  
(*R*)-DIFLUORPHOS

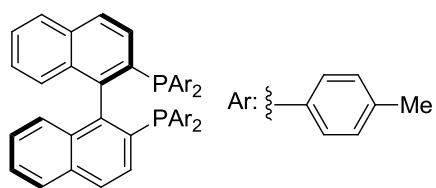

**L28**  
(*R*)-T-BINAP

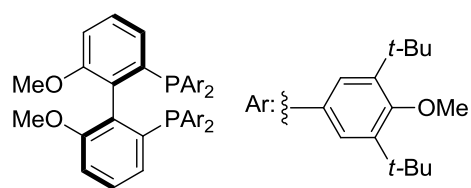

**L29**  
(*R*)-DTBM-BIPHEP

### 3 Vibrational circular dichroism (VCD) measurements

#### IR and VCD measurements

IR and vibrational circular dichroism (VCD) spectra were recorded on a Bruker PMA 50 accessory coupled to a Tensor 27 Fourier transform infrared spectrometer. A photoelastic modulator (Hinds PEM 90) set at 1/4 retardation was used to modulate the handedness of the circular polarized light. Demodulation was performed by a lock-in amplifier (SR830 DSP). An optical low-pass filter (< 1800  $\text{cm}^{-1}$ ) in front of the photoelastic modulator was used to enhance the signal/noise ratio. Spectra were recorded with a transmission cell equipped with  $\text{CaF}_2$  windows and a 0.2 mm Teflon spacer. For measurements solutions in  $\text{CD}_2\text{Cl}_2$  were prepared. The solvent was measured under identical conditions and subtracted to from the VCD spectrum of the compound in order to eliminate artifacts. Samples were measured at a resolution of 4  $\text{cm}^{-1}$  by averaging about 24'000 scans for both the sample and the solvent. Spectra are presented without further data processing.

#### IR and VCD calculations

The geometry optimizations, vibrational frequencies, IR absorption and VCD intensities were calculated with Density Functional Theory (DFT) using the B3PW91 functional and a 6-31G(d,p) basis set. Frequencies were scaled by a factor of 0.97. IR absorption and VCD spectra were constructed from calculated dipole and rotational strengths assuming Lorentzian band shape with a half-width at half maximum of 4  $\text{cm}^{-1}$ . All calculations were performed using Gaussian09.<sup>5</sup>

---

5 Gaussian 09, Revision C.01, M. J. Frisch, G. W. Trucks, H. B. Schlegel, G. E. Scuseria, M. A. Robb, J. R. Cheeseman, G. Scalmani, V. Barone, B. Mennucci, G. A. Petersson, H. Nakatsuji, M. Caricato, X. Li, H. P. Hratchian, A. F. Izmaylov, J. Bloino, G. Zheng, J. L. Sonnenberg, M. Hada, M. Ehara, K. Toyota, R. Fukuda, J. Hasegawa, M. Ishida, T. Nakajima, Y. Honda, O. Kitao, H. Nakai, T. Vreven, J. A. Montgomery Jr., J. E. Peralta, F. Ogliaro, M. Bearpark, J. J. Heyd, E. Brothers, K. N. Kudin, V. N. Staroverov, T. Keith, R. Kobayashi, J. Normand, K. Raghavachari, A. Rendell, J. C. Burant, S. S. Iyengar, J. Tomasi, M. Cossi, N. Rega, J. M. Millam, M. Klene, J. E. Knox, J. B. Cross, V. Bakken, C. Adamo, J. Jaramillo, R. Gomperts, R. E. Stratmann, O. Yazyev, A. J. Austin, R. Cammi, C. Pomelli, J. W. Ochterski, R. L. Martin, K. Morokuma, V. G. Zakrzewski, G. A. Voth, P. Salvador, J. J. Dannenberg, S. Dapprich, A. D. Daniels, O. Farkas, J. B. Foresman, J. V. Ortiz, J. Cioslowski and D. J. Fox, Gaussian, Inc., Wallingford CT, 2010.



3.1 (*R*)-2-(4-methoxyphenyl)-2-methyl-2,5-dihydrofuran (3ab)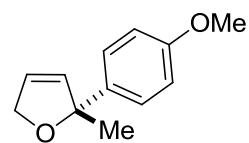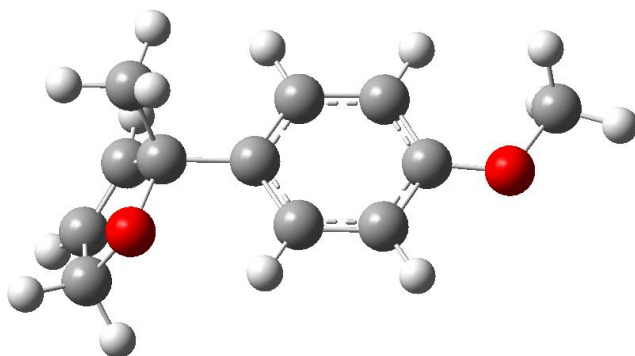

|                    |                    |
|--------------------|--------------------|
| File Name          | bizet1             |
| File Type          | .log               |
| Calculation Type   | FREQ               |
| Calculation Method | RB3PW91            |
| Basis Set          | 6-31G(d,p)         |
| Charge             | 0                  |
| Spin               | Singlet            |
| E(RB3PW91)         | -615.89744326 a.u. |
| RMS Gradient Norm  | 0.00000565 a.u.    |
| Imaginary Freq     | 0                  |
| Dipole Moment      | 2.2896 Debye       |
| Point Group        | C1                 |

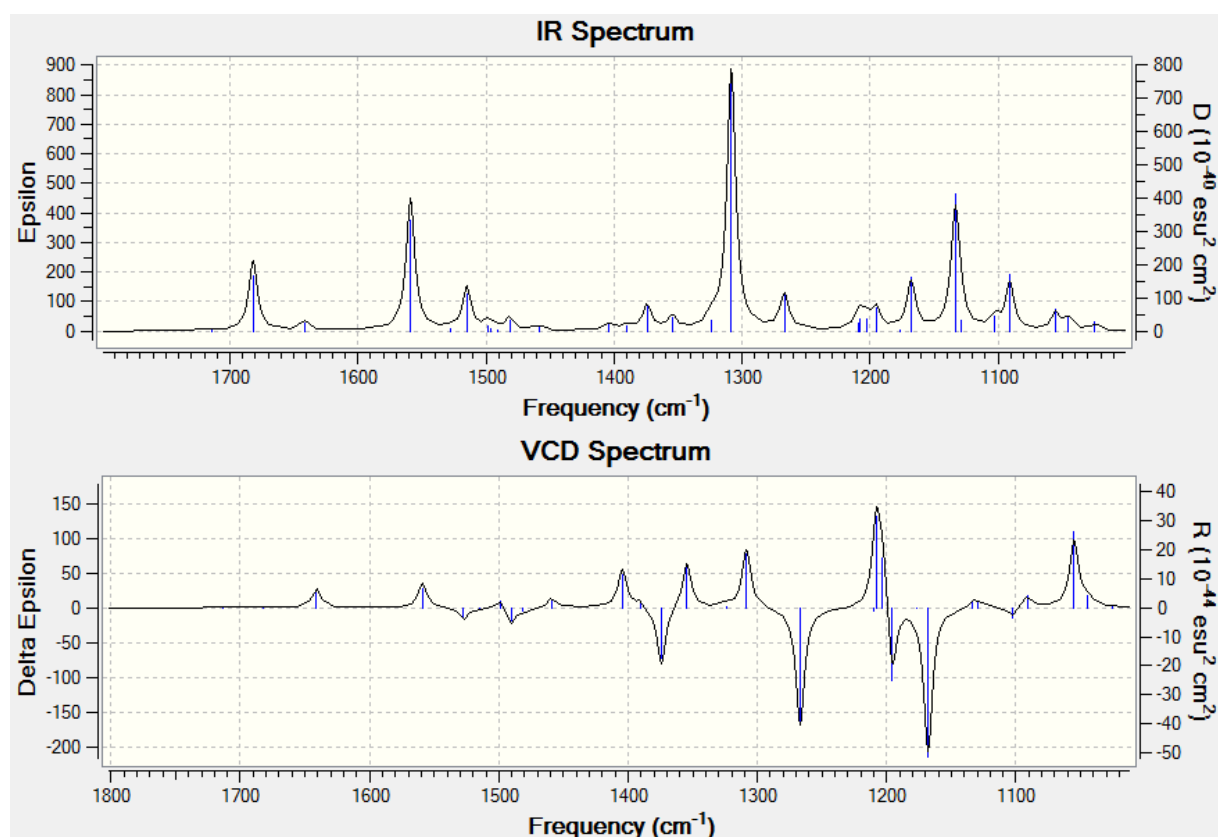

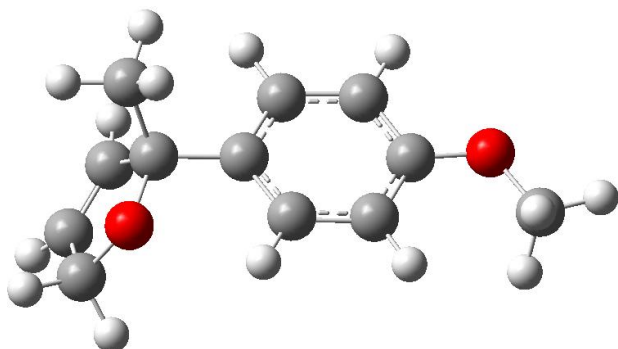

|                    |               |       |
|--------------------|---------------|-------|
| File Name          | bizet2        |       |
| File Type          | .log          |       |
| Calculation Type   | FREQ          |       |
| Calculation Method | RB3PW91       |       |
| Basis Set          | 6-31G(d,p)    |       |
| Charge             | 0             |       |
| Spin               | Singlet       |       |
| E(RB3PW91)         | -615.89769655 | a.u.  |
| RMS Gradient Norm  | 0.00000144    | a.u.  |
| Imaginary Freq     | 0             |       |
| Dipole Moment      | 1.1160        | Debye |
| Point Group        | C1            |       |

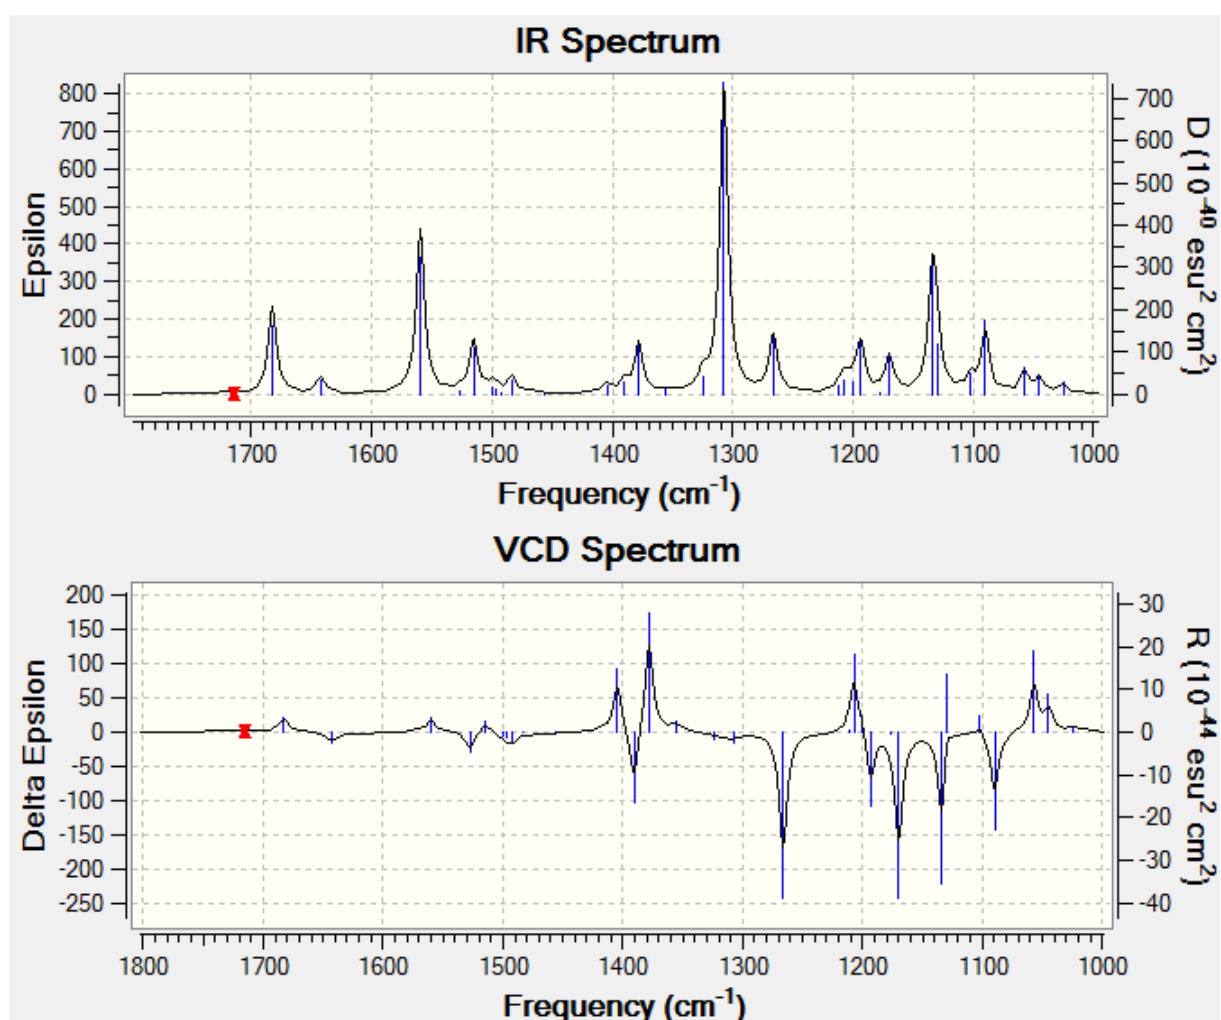

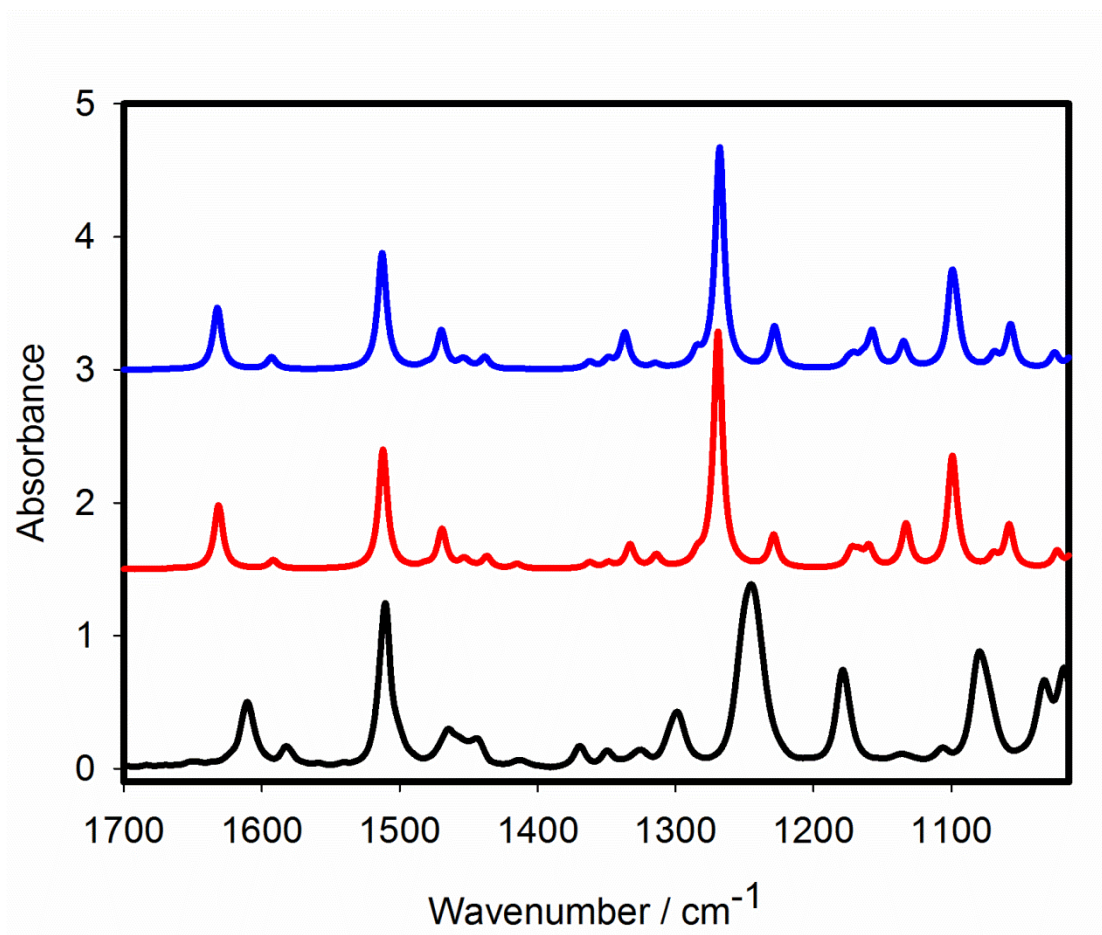

IR spectra: black: experiment (8 microliter in 200 microliter CD<sub>2</sub>Cl<sub>2</sub>), red and blue: calculated (two conformers).

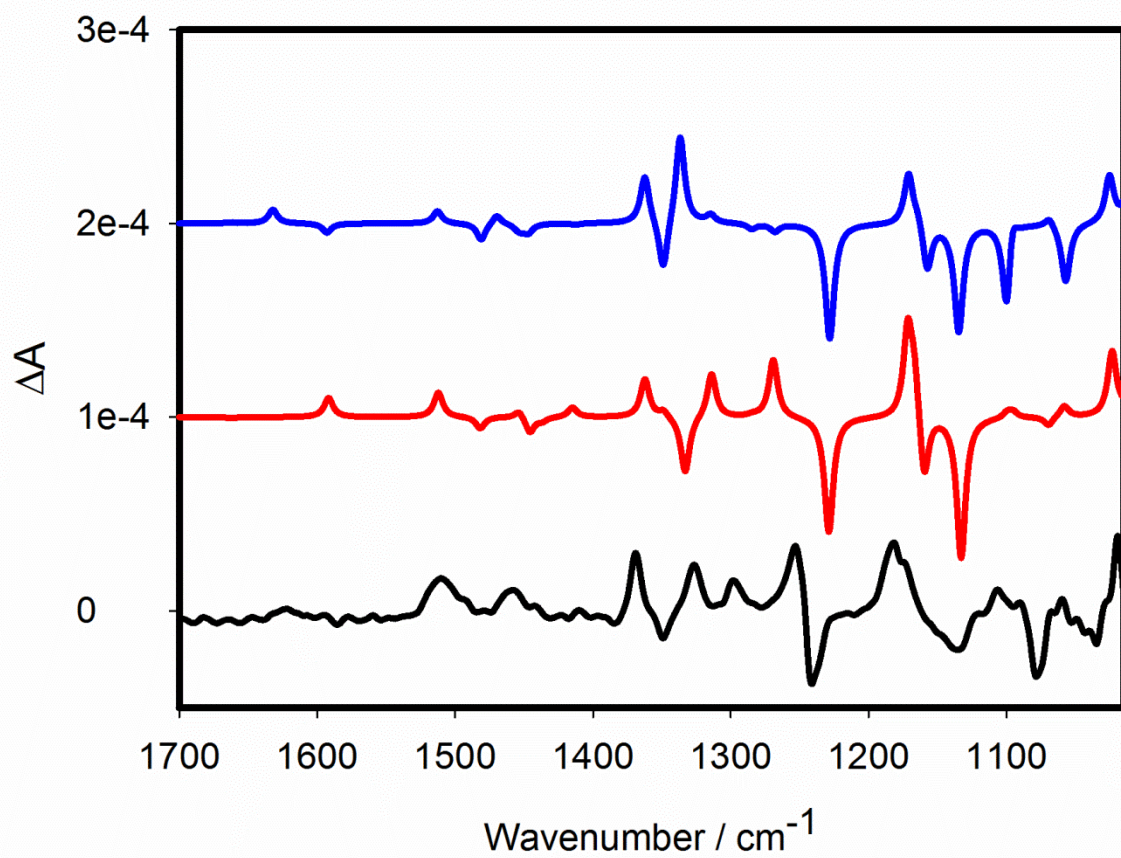

VCD spectra: black: experiment (8 microliter in 200 microliter  $\text{CD}_2\text{Cl}_2$ ), red and blue: calculated (two conformers).

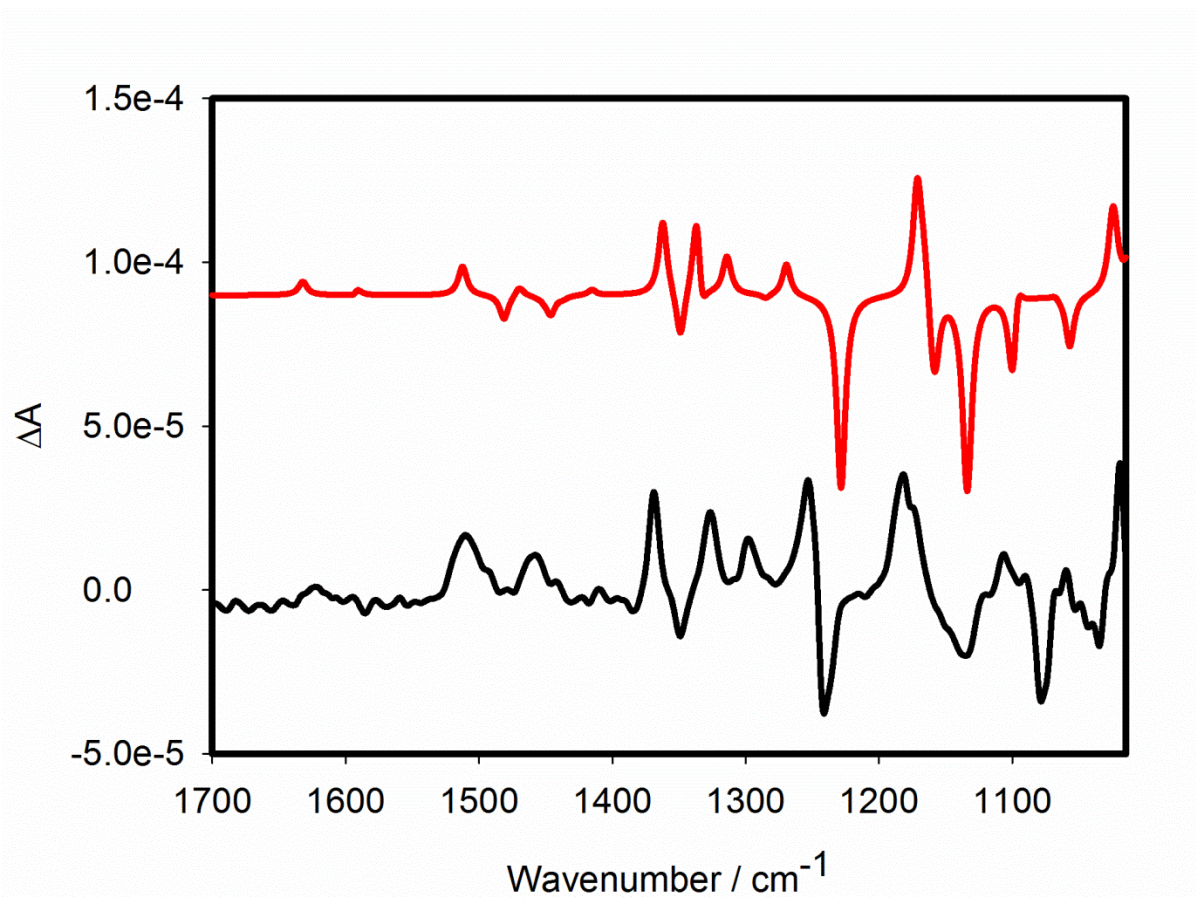

VCD spectra: black: experiment (8 microliter in 200 microliter  $\text{CD}_2\text{Cl}_2$ ), red: calculated, mixture of 40% conformer 1 and 60% conformer 2.

3.2 (*R*)-2-(4-ethoxycarbonylphenyl)-2-methyl-2,3-dihydrofuran (4ap)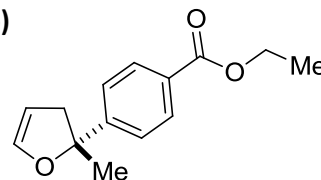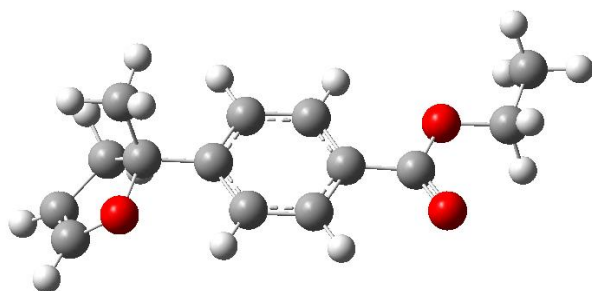

| gustavo            |                    |
|--------------------|--------------------|
| File Name          | gustavob11         |
| File Type          | .log               |
| Calculation Type   | FREQ               |
| Calculation Method | RB3PW91            |
| Basis Set          | 6-31G(d,p)         |
| Charge             | 0                  |
| Spin               | Singlet            |
| E(RB3PW91)         | -768.52500474 a.u. |
| RMS Gradient Norm  | 0.00000242 a.u.    |
| Imaginary Freq     | 0                  |
| Dipole Moment      | 2.9782 Debye       |
| Point Group        | C1                 |

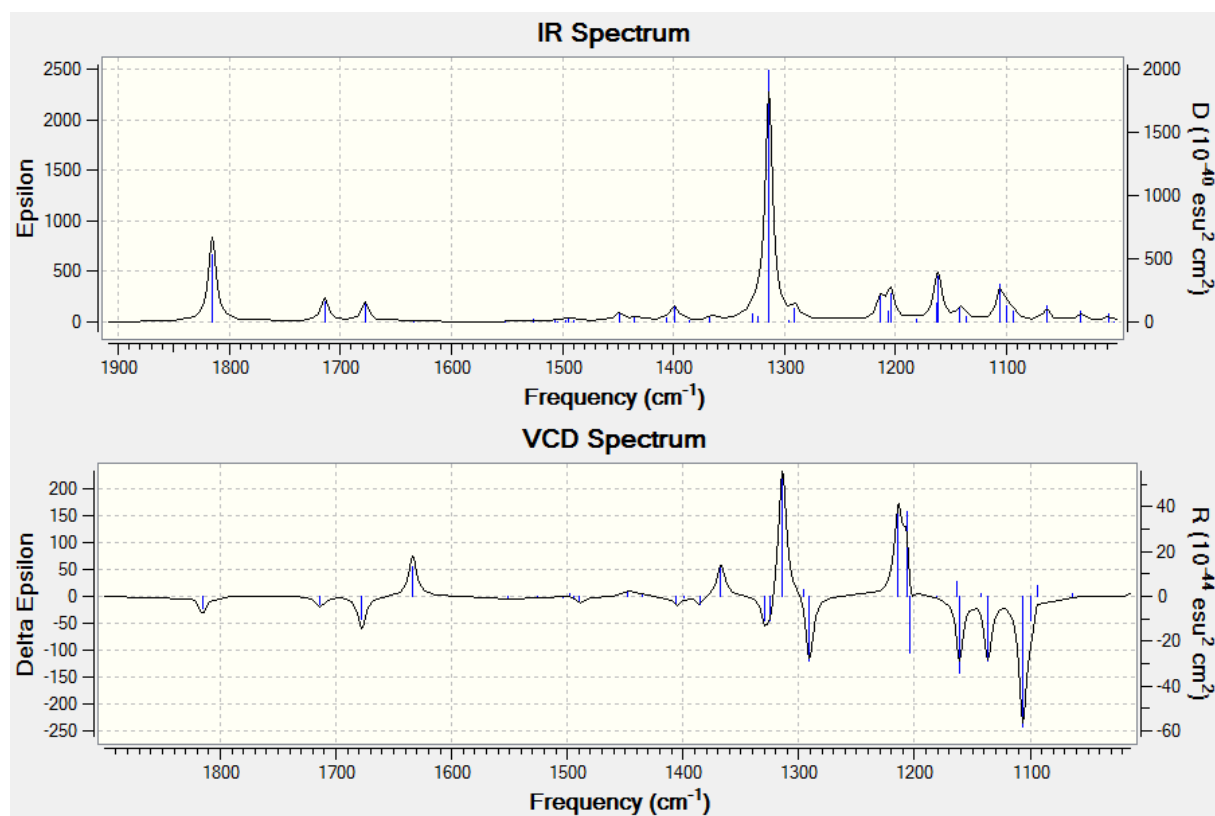

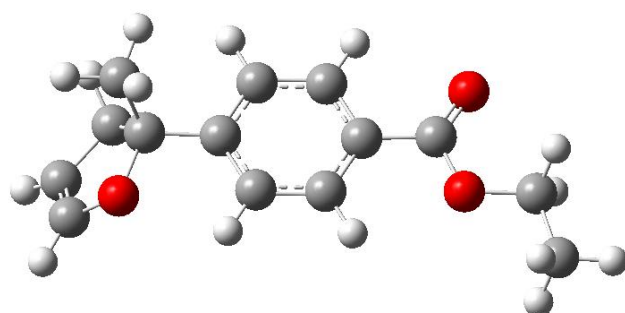

| gustavo            |               |       |
|--------------------|---------------|-------|
| File Name          | gustavob12    |       |
| File Type          | .log          |       |
| Calculation Type   | FREQ          |       |
| Calculation Method | RB3PW91       |       |
| Basis Set          | 6-31G(d,p)    |       |
| Charge             | 0             |       |
| Spin               | Singlet       |       |
| E(RB3PW91)         | -768.52516140 | a.u.  |
| RMS Gradient Norm  | 0.00000187    | a.u.  |
| Imaginary Freq     | 0             |       |
| Dipole Moment      | 1.6217        | Debye |
| Point Group        | C1            |       |

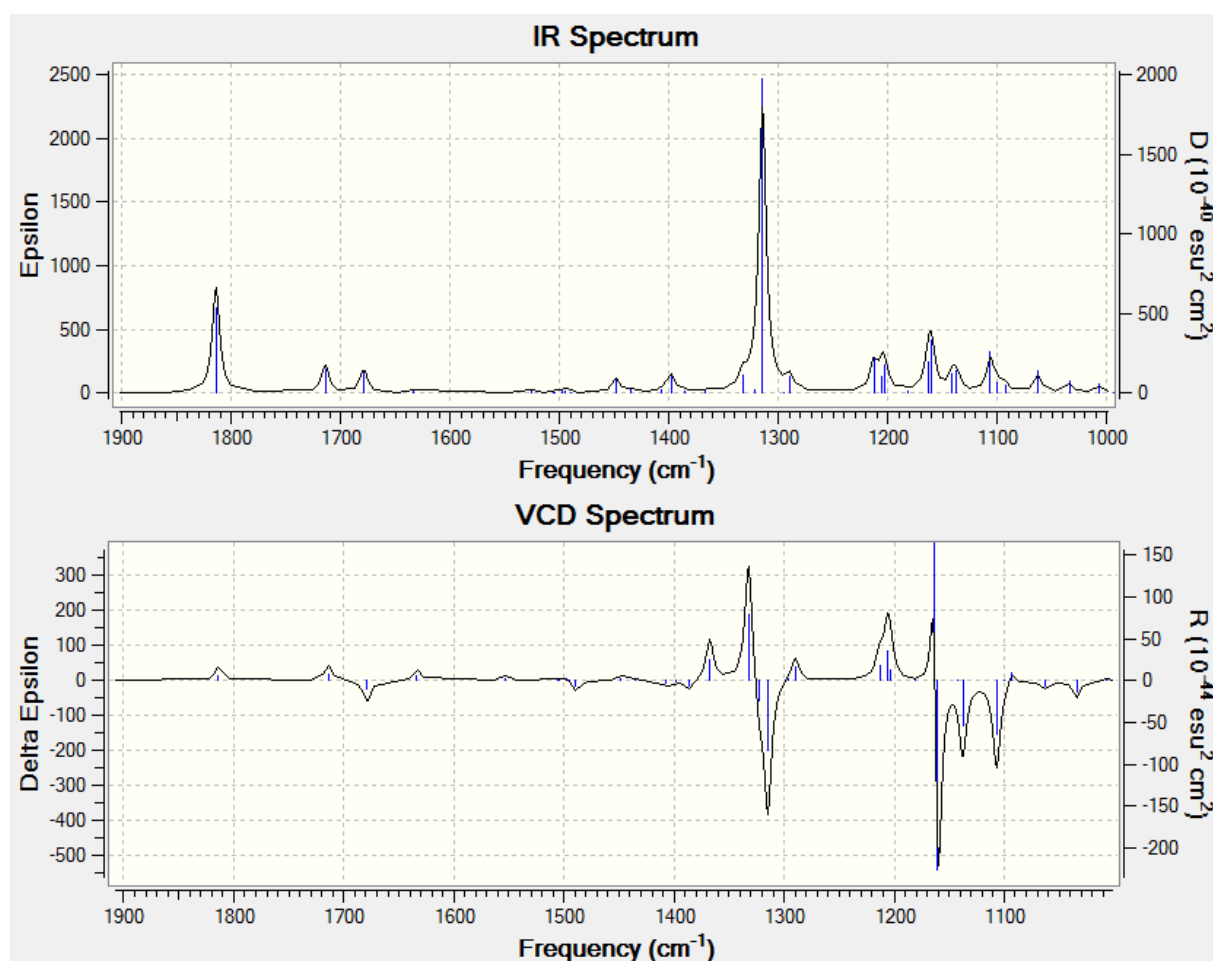

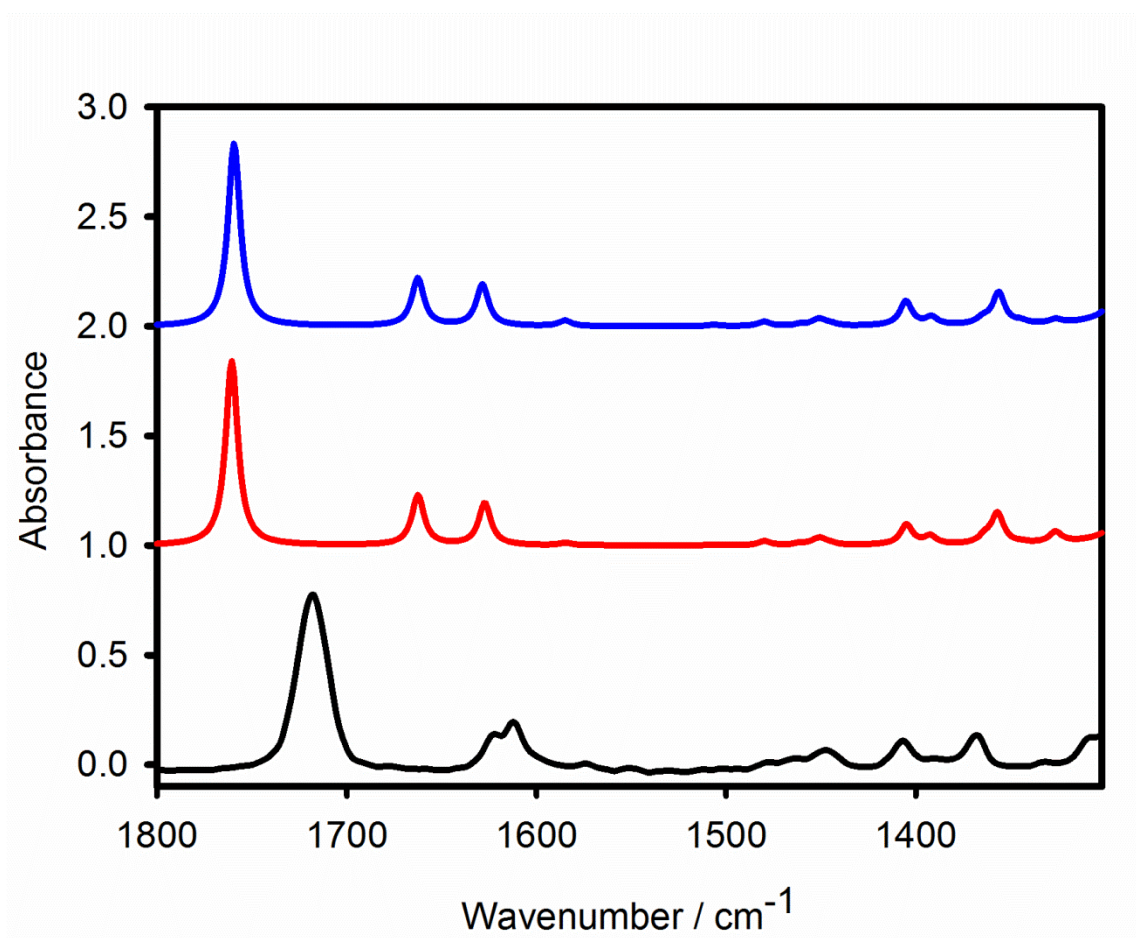

IR spectra: black: experiment (1 microliter in 200 microliter CD<sub>2</sub>Cl<sub>2</sub>), red and blue: calculated (two conformers).



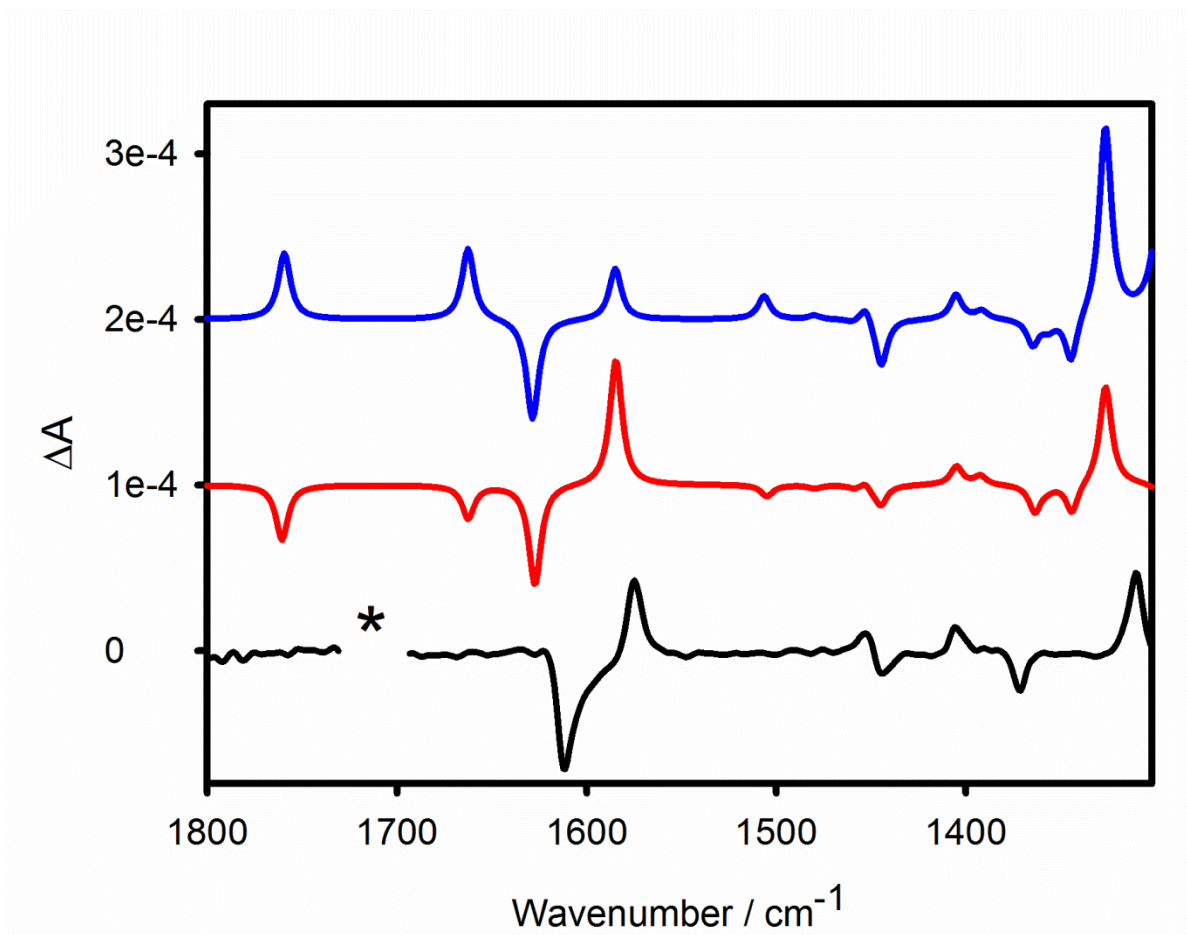

VCD spectra: black: experiment (3 microliter in 200 microliter  $\text{CD}_2\text{Cl}_2$ ), red and blue: calculated (two conformers). The region marked by the asterisks could not be measured at this concentration due to strong absorption in this region.

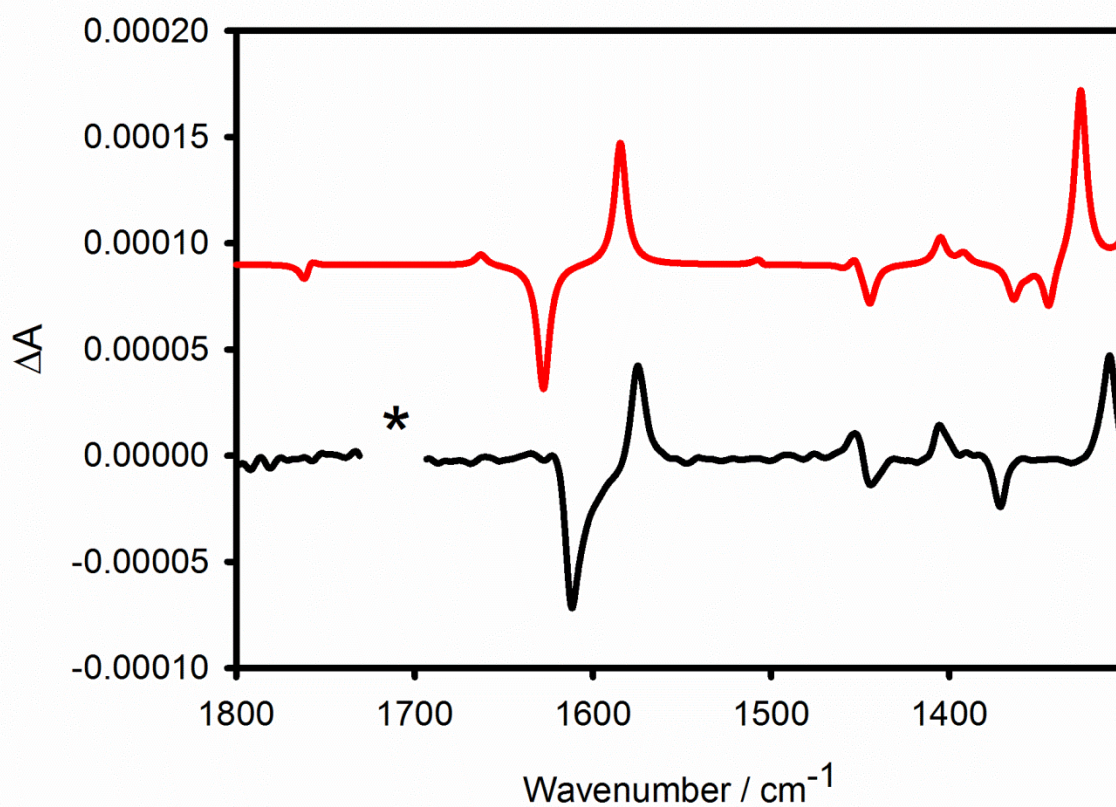

VCD spectra: black: experiment (3 microliter in 200 microliter  $\text{CD}_2\text{Cl}_2$ ), red: calculated, mixture of 60% conformer 1 and 40% conformer 2. The region marked by the asterisks could not be measured at this concentration due to strong absorption in this region.

Conclusion: Quite good agreement between experiment and calculations for a mixture of both conformers. Absolute configuration of the measured sample is the same as the one of the calculated enantiomer.

## 4 Experimental procedures and characterization data

### 4.1 General procedure for the synthesis of 5-alkyl-2,3-dihydrofuran (in a 2-Me-THF solution) (GP1)

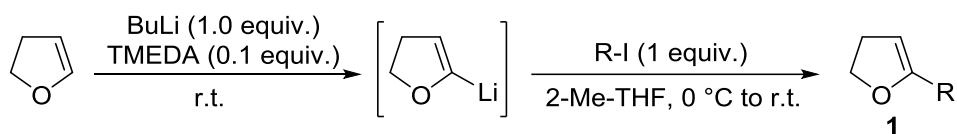

To a mixture of 2,3-dihydrofuran (2.72 mL, 36 mmol, 1 equiv.) and TMEDA (0.54 mL, 3.6 mmol, 0.1 equiv.) at room temperature in a water bath was added dropwise *n*-butyllithium (1.6 M, 22.5 mL, 36 mmol, 1 equiv.) in solution in hexane over 15 min. Over the course of addition, the reaction became light yellow with formation of an off-white precipitate. The reaction was then stirred 2 h at room temperature, then concentrated under reduced pressure and the resulting solid was dissolved in dried and degassed 2-Me-THF (5 mL). The resulting brown solution was cooled again to 0 °C and the appropriate alkyl iodide (36 mmol, 1 equiv.) was added dropwise over 15 min with vigorous stirring. The solution was stirred at room temperature for 3 h and then distilled to dryness using a dry ice cooled condenser to give a colorless liquid. The solution is then refluxed over sodium for 4 h while the mixture became blue. After stirring at room temperature overnight, the solution was distilled to give a colorless solution of 5-substituted-2,3-dihydrofuran **1** in 2-Me-THF as a colorless liquid. The concentration of **1** was determined by <sup>1</sup>H NMR using 1,3-di-*tert*-butyl-2-methoxy-5-methylbenzene as internal reference.

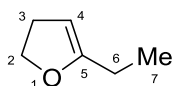

#### 5-Ethyl-2,3-dihydrofuran (**1b**)

Prepared according to **GP1** using ethyl iodide as electrophile. Isolated by distillation (44% yield, 3.7 M in 2-Me-THF). <sup>1</sup>H-NMR (C<sub>6</sub>D<sub>6</sub>, 300 MHz):  $\delta$  (ppm) = 1.00 (t, <sup>3</sup>J<sub>H-H</sub> = 7.5 Hz, 3H, H-7), 2.06 (ddq, <sup>3</sup>J<sub>H-H</sub> = 7.5 Hz, <sup>4</sup>J<sub>H-H</sub> = 3.2 Hz, <sup>5</sup>J<sub>H-H</sub> = 1.8 Hz, 2H, H-6), 2.32 (ddq, <sup>3</sup>J<sub>H-H</sub> = 9.4 Hz, <sup>3</sup>J<sub>H-H</sub> = 4.1 Hz, <sup>5</sup>J<sub>H-H</sub> = 2.0 Hz, 2H, H-3), 4.09 (t, <sup>3</sup>J<sub>H-H</sub> = 9.3 Hz, 2H, H-2), 4.44-4.46 (m, 1H, H-4); <sup>13</sup>C{<sup>1</sup>H}-NMR (C<sub>6</sub>D<sub>6</sub>, 75 MHz):  $\delta$  (ppm) = 11.4 (C-7), 21.6 (C-6), 30.3 (C-3), 69.8 (C-2), 92.5 (C-4), 161.1 (C-5); GC-MS (EI): (C<sub>6</sub>H<sub>10</sub>O), 98.1 (100, M<sup>+</sup>), 69.1 (30, M<sup>+</sup> - 29), 57.1 (86, M<sup>+</sup> - 41); IR spectrum (2-MeTHF) (cm<sup>-1</sup>) = 2970, 1668, 1462, 1377, 1165, 1090, 1008, 932, 898, 717.

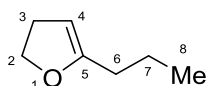

### 5-Propyl-2,3-dihydrofuran

Prepared according to **GP1** using propyl iodide as electrophile. Isolated by distillation (51% yield, 3.3 M in 2-Me-THF). **<sup>1</sup>H-NMR (C<sub>6</sub>D<sub>6</sub>, 400 MHz):**  $\delta$  (ppm) = 0.85 (t,  $^3J_{\text{H-H}} = 7.4$  Hz, 3H, H-8), 1.52 (hex,  $^3J_{\text{H-H}} = 7.4$  Hz, 2H, H-7), 2.07 (t,  $^3J_{\text{H-H}} = 7.5$  Hz, 2H, H-6), 2.33 (m, 2H, H-3), 4.09 (t,  $^3J_{\text{H-H}} = 9.3$  Hz, 2H, H-2), 4.47-4.49 (m, 1H, H-4); **<sup>13</sup>C{<sup>1</sup>H}-NMR (C<sub>6</sub>D<sub>6</sub>, 100 MHz):**  $\delta$  (ppm) = 13.9 (C-8), 20.4 (C-7), 26.2 (C-6 + C-3), 69.7 (C-2), 93.6 (C-4), 159.4 (C-5); **GC-MS (EI):** (C<sub>7</sub>H<sub>12</sub>O), 112.1 (41, M<sup>+</sup>), 97.1 (92, M<sup>+</sup> - 15), 84.9 (27, M<sup>+</sup> - 28), 69.0 (26, M<sup>+</sup> - 43), 55.1 (100, M<sup>+</sup> - 57); **IR spectrum (2-MeTHF) (cm<sup>-1</sup>)** = 2960, 1667, 1460, 1376, 1258, 1165, 1003, 963, 935, 719.

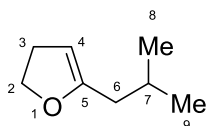

### 5-isobutyl-2,3-dihydrofuran (1c)

Prepared according to **GP1** using isobutyl iodide as electrophile. Isolated by distillation (25% yield, 2.0 M in 2-Me-THF). **<sup>1</sup>H-NMR (C<sub>6</sub>D<sub>6</sub>, 400 MHz):**  $\delta$  (ppm) = 0.89 (d,  $^3J_{\text{H-H}} = 6.5$  Hz, 6H, H-8 + H-9), 1.89-1.96 (m, 1H, H-7), 1.98-1.99 (m, 2H, H-6), 2.30-2.36 (m, 2H, H-3), 4.07 (t,  $^3J_{\text{H-H}} = 9.3$  Hz, 2H, H-2), 4.47-4.48 (m, 1H, H-4); **<sup>13</sup>C{<sup>1</sup>H}-NMR (C<sub>6</sub>D<sub>6</sub>, 100 MHz):**  $\delta$  (ppm) = 22.7 (C-8 + C-9), 26.5 (C-7), 30.4 (C-3), 37.6 (C-6), 69.7 (C-2), 94.7 (C-4), 158.6 (C-5); **GC-MS (EI):** (C<sub>8</sub>H<sub>14</sub>O), 126.1 (27, M<sup>+</sup>), 111.1 (93, M<sup>+</sup> - 15), 84.1 (24, M<sup>+</sup> - 42), 69.1 (100, M<sup>+</sup> - 57), 55.1 (23, M<sup>+</sup> - 71); **IR spectrum (2-MeTHF) (cm<sup>-1</sup>)** = 2960, 2278, 1667, 1457, 1330, 1171, 1089, 1005, 936, 812.

## 4.2 Procedures for the synthesis of 5-alkyl-2,3-dihydrofuran (neat)

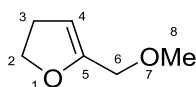

### 5-(methoxymethyl)-2,3-dihydrofuran (1d)

To a solution of sodium hydride (720 mg, 30 mmol, 2 equiv.) in dry THF (20 mL) at 0 °C was added dropwise 5-(methanolyl)-2,3-dihydrofuran (1.5 g, 15 mmol, 1 equiv.) over 5 min. The reaction was then stirred for 2 h at room temperature. The solution was cooled again to 0 °C and methyl iodide (1.9 mL, 30 mmol, 2 equiv.) was added dropwise over 15 min. The solution was stirred for 2 h at room temperature. The reaction was carefully quenched with water, extracted with diethyl ether, dried over magnesium sulfate, filtered and concentrated under reduced pressure. The residue was

distilled with Kugelrohr distillation set to afford 5-(methoxymethyl)-2,3-dihydrofuran (1.0 g, 60%) as a colorless oil.

**$^1\text{H-NMR}$  ( $\text{C}_6\text{D}_6$ , 400 MHz):**  $\delta$  (ppm) = 2.21-2.26 (m, 1H, H-3), 3.14 (s, 3H, H-8), 3.86 (m, 2H, H-6), 4.05 (t,  $^3J_{\text{H-H}} = 9.4$  Hz, 2H, H-2), 4.75-4.76 (m, 1H, H-4);  **$^{13}\text{C}\{^1\text{H}\}$ -NMR ( $\text{C}_6\text{D}_6$ , 100 MHz):**  $\delta$  (ppm) = 30.1 (C-3), 58.1 (C-8), 67.5 (C-6), 70.1 (C-2), 97.2 (C-4), 156.2 (C-5); **GC-MS (EI):** ( $\text{C}_6\text{H}_{10}\text{O}_2$ ), 114.1 (100,  $\text{M}^+$ ), 99.0 (81), 81.2 (12), 72.1 (21), 58.1 (36); **IR spectrum (neat)** ( $\text{cm}^{-1}$ ) = 2902, 1776, 1670, 1452, 1186, 1049, 999, 957, 926, 895, 721.

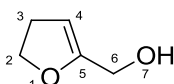

### 5-(methanolyl)-2,3-dihydrofuran (1e)

To a mixture of 2,3-dihydrofuran (3.8 mL, 50 mmol, 1 equiv.) in dry THF (50 mL) at room temperature in a water bath was added dropwise *n*-butyllithium (1.6 M, 31.3 mL, 50 mmol, 1 equiv.) in solution in hexane over 15 min. The reaction was then stirred 2 h at room temperature. The solution was cooled to 0 °C and paraformaldehyde (2.4 g, 80 mmol, 1.6 equiv.) was added portionwise over 5 min. The solution was then refluxed for 2 h. After cooling down to room temperature, iced water (10 mL) was added to the mixture. The organic phase was collected, while the aqueous phase was extracted 5 times with dichloromethane. Combined organic phases were dried over magnesium sulfate, filtered and concentrated under reduced pressure. The residue was distilled with Kugelrohr distillation set to afford 5-(methanolyl)-2,3-dihydrofuran (3.0 g, 60%) as a colorless oil.

**$^1\text{H-NMR}$  ( $\text{C}_6\text{D}_6$ , 400 MHz):**  $\delta$  (ppm) = 2.23-2.28 (m, 2H, H-3), 3.01 (bs, 1H, H-7), 4.05 (t,  $^3J_{\text{H-H}} = 9.5$  Hz, 2H, H-2), 4.07 (s, 2H, H-6), 4.73 (s, 1H, H-4);  **$^{13}\text{C}\{^1\text{H}\}$ -NMR ( $\text{C}_6\text{D}_6$ , 100 MHz):**  $\delta$  (ppm) = 30.0 (C-3), 58.1 (C-6), 70.3 (C-2), 95.6 (C-4), 158.4 (C-5); **GC-MS (EI):** ( $\text{C}_5\text{H}_8\text{O}_2$ ), 100.1 (6,  $\text{M}^+$ ), 84.1 (100,  $\text{M}^+ - 16$ ), 71.1 (10,  $\text{M}^+ - 29$ ), 56.1 (18,  $\text{M}^+ - 44$ ); **IR spectrum (neat)** ( $\text{cm}^{-1}$ ) = 3419, 2877, 1674, 1263, 1179, 1058, 1024, 999, 929, 893, 732.

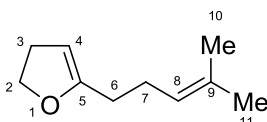

### 5-(4-methylpent-3-en-1-yl)-2,3-dihydrofuran (1f)

To a mixture of 2,3-dihydrofuran (1.13 mL, 15 mmol, 1 equiv.) and TMEDA (0.22 mL, 1.5 mmol, 0.1 equiv.) in dry THF (30 mL), *n*-butyllithium (1.6 M, 9.4 mL, 15 mmol, 1 equiv.) in solution in hexane

was added dropwise over 15 min at room temperature. The reaction was stirred for 2 h at room temperature. The solution was cooled to 0 °C and 5-bromo-2-methylpent-2-ene<sup>6</sup> (1 mL, 7.5 mmol, 0.5 equiv.) was added dropwise with vigorous stirring over 5 min. The solution was stirred at room temperature overnight. The remaining traces of 5-bromo-2-methylpent-2-ene were removed by refluxing the solution over small pieces of sodium for 4 h. Then the reaction was diluted with diethyl ether (20 mL), filtered over a short pad of Celite® and concentrated under reduced pressure. The residue was distilled with Kugelrohr distillation set to afford 5-(4-methylpent-3-en-1-yl)-2,3-dihydrofuran (520 mg, 46%) as a colorless oil.

**<sup>1</sup>H-NMR (C<sub>6</sub>D<sub>6</sub>, 400 MHz):**  $\delta$  (ppm) = 1.52 (s, 3H, H-10), 1.63 (s, 3H, H-11), 2.19-2.23 (m, 2H, H-6), 2.26-2.36 (m, 4H, H-7 + H-3), 4.09 (t, <sup>3</sup>J<sub>H-H</sub> = 9.3 Hz, 2H, H-2), 4.51-4.52 (m, 1H, H-4), 5.17-5.21 (m, 1H, H-8); **<sup>13</sup>C{<sup>1</sup>H}-NMR (C<sub>6</sub>D<sub>6</sub>, 100 MHz):**  $\delta$  (ppm) = 17.7 (C-10), 25.8 (C-11), 25.9 (C-7), 28.7 (C-6), 30.4 (C-3), 69.8 (C-2), 93.7 (C-4), 124.4 (C-8), 131.8 (C-9), 159.3 (C-5); **GC-MS (EI):** (C<sub>10</sub>H<sub>16</sub>O), 152.1 (35, M<sup>+</sup>), 137.1 (25, M<sup>+</sup> – 15), 84.1 (77, M<sup>+</sup> – 68), 69.1 (100, M<sup>+</sup> – 83), 55.1 (29, M<sup>+</sup> – 97); **IR spectrum (neat)** (cm<sup>-1</sup>) = 2917, 1667, 1445, 1376, 1246, 1162, 1003, 958, 930, 902, 718.

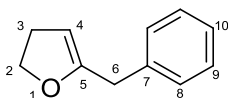

### 5-benzyl-2,3-dihydrofuran (1g)

To a mixture of 2,3-dihydrofuran (1.13 mL, 15 mmol, 1 equiv.) and TMEDA (0.22 mL, 1.5 mmol, 0.1 equiv.) in dry THF (30 mL) at room temperature in a water bath was added dropwise *n*-butyllithium (1.6 M, 9.4 mL, 15 mmol, 1 equiv.) in solution in hexane over 15 min. The reaction was then stirred for 2 h at room temperature. The solution was cooled to 0 °C and benzyl bromide (1.8 mL, 15 mmol, 1 equiv.) was added dropwise with vigorous stirring over 15 min. Then, the solution was stirred at room temperature overnight. The remaining traces of benzyl bromide were removed by refluxing the solution over small pieces of sodium for 4 h. Then the reaction was diluted with diethyl ether (20 mL), filtered over a short pad of Celite® and concentrated under reduced pressure. The residue was distilled with Kugelrohr distillation set to afford 5-benzyl-2,3-dihydrofuran (1.2 g, 48%, 95% purity) as a colorless oil.

**<sup>1</sup>H-NMR (C<sub>6</sub>D<sub>6</sub>, 400 MHz):**  $\delta$  (ppm) = 2.22-2.28 (m, 2H, H-3), 3.34 (s, 2H, H-6), 4.03 (t, <sup>3</sup>J<sub>H-H</sub> = 9.3 Hz, 2H, H-2), 4.41-4.42 (m, 1H, H-4), 7.04-7.08 (m, 1H, H-10), 7.12-7.16 (m, 2H, H-9), 7.20-7.21 (m, 2H, H-8); **<sup>13</sup>C{<sup>1</sup>H}-NMR (C<sub>6</sub>D<sub>6</sub>, 100 MHz):**  $\delta$  (ppm) = 30.3 (C-3), 35.1 (C-6), 70.1 (C-2), 95.4 (C-4), 126.6 (C-10),

<sup>6</sup> Prepared according to B. D. Schwartz, D. P. Tilly, R. Heim, S. Wiedemann, C. M. Williams and P. V. Bernhardt, *Eur. J. Org. Chem.* 2006, 3181.

128.6 (C-9), 129.4 (C-8), 138.4 (C-7), 158.5 (C-5); **GC-MS (EI)**: (C<sub>11</sub>H<sub>12</sub>O), 160.1 (100, M<sup>+</sup>), 118.0 (100, M<sup>+</sup> – 42), 104.1 (45, M<sup>+</sup> – 56), 90.1 (88, M<sup>+</sup> – 70); **IR spectrum (neat)** (cm<sup>-1</sup>) = 2895, 1666, 1494, 1454, 1375, 1256, 1156, 1002, 944, 699.

#### 4.3 General procedure for the asymmetric intermolecular Heck reaction with neat 5-alkyl-2,3-dihydrofurans (GP2)

In a glovebox, a 5 mL Young valve Schlenk was charged with Pd<sub>2</sub>(dba)<sub>3</sub> (4.57 mg, 0.005 mmol, 2.5 mol%), the appropriate chiral ligand (0.02 mmol, 10 mol%) and 0.68 mL of degassed 2-Me-THF. The Schlenk was taken outside the glovebox, connecting to a two-manifold line and the mixture was stirred at r.t. for 15 min. Next, PhCF<sub>3</sub> (i.e. internal standard; 29.2 mg, 0.2 mmol, 1 equiv.), ArOTf (0.2 mmol, 1 equiv.), <sup>i</sup>Pr<sub>2</sub>NEt (0.105 mL, 0.6 mmol, 3 equiv.) and neat 5-alkyl-2,3-dihydrofuran (1 mmol, 5 equiv.) were added consecutively under a flow of N<sub>2</sub> gas. The sealed reaction tube was immersed in a 100 °C pre-heated oil bath for 48-72 h. After cooling to r.t., the reaction mixture was poured into pentane (5 mL) under vigorous stirring, and the resulting precipitate was removed passing the solution through a short pad of Celite®. The filtrate was concentrated to dryness to give an oil which was directly subjected to flash chromatography (Cyclohexane:AcOEt).

The **large scale experiment** described on Figure 2 of the manuscript was performed according to GP2 using 5-methyl-2,3-dihydrofuran (3.87 mL, 42.5 mmol, 5 equiv.), 4-cyanophenyl trifluoromethanesulfonate (2.13 g, 8.5 mmol, 1 equiv.), Pd<sub>2</sub>(dba)<sub>3</sub> (192 mg, 0.21 mmol, 2.5 mol%), (*R*)-**L2** (518 mg, 0.85 mmol, 10 mol%), <sup>i</sup>Pr<sub>2</sub>NEt (4.44 mL, 25.5 mmol, 3 equiv.) in 2-Me-THF (29 mL) and the reaction run for 60 h.

#### 4.4 General procedure for the asymmetric intermolecular Heck reaction with 5-alkyl-2,3-dihydrofuran in a 2-Me-THF solution (GP3)

For 5-alkyl-2,3-dihydrofurans in 2-Me-THF solutions the overall concentration of the reaction is maintained to 0.3 M (i.e. volume of the 5-alkyl-2,3-dihydrofuran in 2-Me-THF + volume of 2-Me-THF added in the glovebox to prepare the catalyst, V<sub>Tot</sub> = 0.68 mL).

## 4.5 Characterization data of 2-aryl-2-methyl-2,5-dihydrofurans

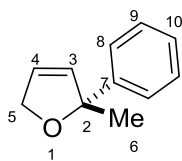**(R)-2-methyl-2-phenyl-2,5-dihydrofuran (3aa)**

Prepared according to **GP2** using 5-methyl-2,3-dihydrofuran (**1a**). Isolated by column chromatography (Cyclohexane:AcOEt 80:1) as a pale yellow oil (27% yield, 92% *ee*) with  $R_f = 0.67$  (Cyclohexane:AcOEt 10:1);  $^1\text{H-NMR}$  ( $\text{C}_6\text{D}_6$ , 400 MHz):  $\delta$  (ppm) = 1.63 (s, 3H, H-6), 4.53 (ddd,  $^2J_{\text{H-H}} = 12.9$  Hz,  $^3J_{\text{H-H}} = 2.4$  Hz,  $^4J_{\text{H-H}} = 1.6$  Hz, 2H, H-5), 4.55 (ddd,  $^2J_{\text{H-H}} = 12.9$  Hz,  $^3J_{\text{H-H}} = 2.4$  Hz,  $^4J_{\text{H-H}} = 1.6$  Hz, 1H, H-5'), 5.39 (dt,  $^3J_{\text{H-H}} = 6.0$  Hz,  $^4J_{\text{H-H}} = 1.6$  Hz, 1H, H-3), 5.72 (dt,  $^3J_{\text{H-H}} = 6.0$  Hz,  $^3J_{\text{H-H}} = 2.4$  Hz, 1H, H-4), 6.83 (m, 2H, H-9), 7.35 (m, 2H, H-8);  $^{13}\text{C}\{^1\text{H}\}$ -NMR ( $\text{C}_6\text{D}_6$ , 100 MHz): 28.8 (C-6), 74.7 (C-5), 90.8 (C-2), 125.10 (C-3), 125.15 (C-8), 126.89 (C-10), 128.50 (C-9), 134.55 (C-4), 147.36 (C-7); **MS (ESI)**:  $\text{C}_{11}\text{H}_{12}\text{O}$ Li, 167.1  $[\text{M}+\text{Li}]^+$ ; **IR spectrum (neat)** ( $\text{cm}^{-1}$ ) = 2973, 2925, 2849, 1600, 1492, 1444, 1367, 1347, 1237, 1134, 1083, 1067, 1017, 904, 863, 762, 696, 710;  $[\alpha]_D^{23} = +108.2$  (c 0.83,  $\text{CH}_2\text{Cl}_2$ ); **HPLC**: OJ-H, 220 nm, Hexane:*i*PrOH, 98:2, 1 mL/min, 30 °C,  $t_{R1} = 10.7$  and  $t_{R2} = 12.6$  min.

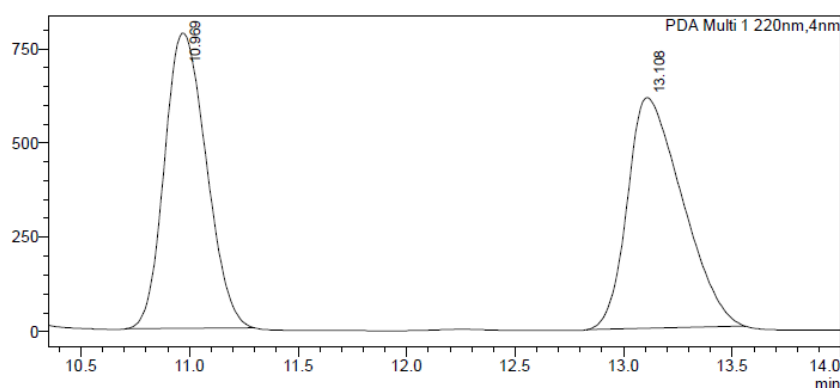**<Peak Table>**

| PDA Ch1 220nm |           |         |
|---------------|-----------|---------|
| Peak#         | Ret. Time | Area%   |
| 1             | 10.969    | 49.336  |
| 2             | 13.108    | 50.664  |
| Total         |           | 100.000 |

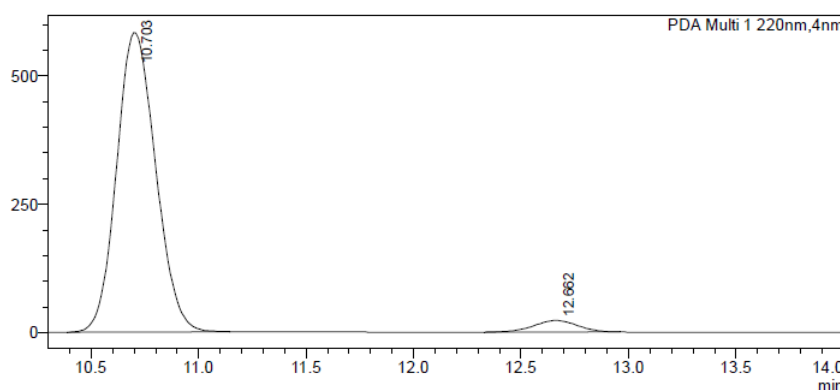**<Peak Table>**

| PDA Ch1 220nm |           |         |
|---------------|-----------|---------|
| Peak#         | Ret. Time | Area%   |
| 1             | 10.703    | 95.865  |
| 2             | 12.662    | 4.135   |
| Total         |           | 100.000 |



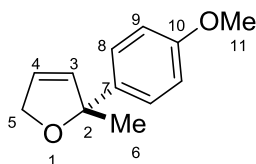

### (R)-2-(4-methoxyphenyl)-2-methyl-2,5-dihydrofuran (3ab)

Prepared according to **GP2** using 5-methyl-2,3-dihydrofuran (**1a**). Isolated by column chromatography (Cyclohexane:AcOEt 60:1) as a pale yellow oil (64% yield, 93% *ee*) with  $R_f = 0.67$  (Cyclohexane:AcOEt 10:1);  **$^1\text{H-NMR}$  ( $\text{C}_6\text{D}_6$ , 400 MHz):**  $\delta$  (ppm) = 1.63 (s, 3H, H-6), 3.32 (s, 3H, H-11), 4.53 (ddd,  $^2J_{\text{H-H}} = 12.9$  Hz,  $^3J_{\text{H-H}} = 2.4$  Hz,  $^4J_{\text{H-H}} = 1.6$  Hz, 2H, H-5), 4.55 (ddd,  $^2J_{\text{H-H}} = 12.9$  Hz,  $^3J_{\text{H-H}} = 2.4$  Hz,  $^4J_{\text{H-H}} = 1.6$  Hz, 1H, H-5'), 5.39 (dt,  $^3J_{\text{H-H}} = 6.0$  Hz,  $^4J_{\text{H-H}} = 1.6$  Hz, 1H, H-3), 5.72 (dt,  $^3J_{\text{H-H}} = 6.0$  Hz,  $^3J_{\text{H-H}} = 2.4$  Hz, 1H, H-4), 6.83 (m, 2H, H-9), 7.35 (m, 2H, H-8);  **$^{13}\text{C}\{^1\text{H}\}$ -NMR ( $\text{C}_6\text{D}_6$ , 100 MHz):**  $\delta$  (ppm) = 28.7 (C-6), 54.8 (C-11), 74.6 (C-5), 90.5 (C-2), 113.9 (C-9), 124.8 (C-3), 126.4 (C-8), 134.9 (C-4), 139.4 (C-7), 159.0 (C-10); **HRMS** (ESI positive) calculated for  $\text{C}_{12}\text{H}_{15}\text{O}_2$ , 191.1067  $[\text{M}+\text{H}]^+$ , found 191.1058; **IR spectrum (neat)** ( $\text{cm}^{-1}$ ) = 2969, 1610, 1509, 1457, 1299, 1241, 1176, 1017, 829, 704;  $[\alpha]_{\text{D}}^{23} = +137.1$  (c 0.63,  $\text{CH}_2\text{Cl}_2$ ); **HPLC:** OJ-H, 220 nm, Hexane:*i*PrOH, 98:2, 1 mL/min, 30 °C,  $t_{\text{R}1} = 27.6$  and  $t_{\text{R}2} = 41.6$  min.

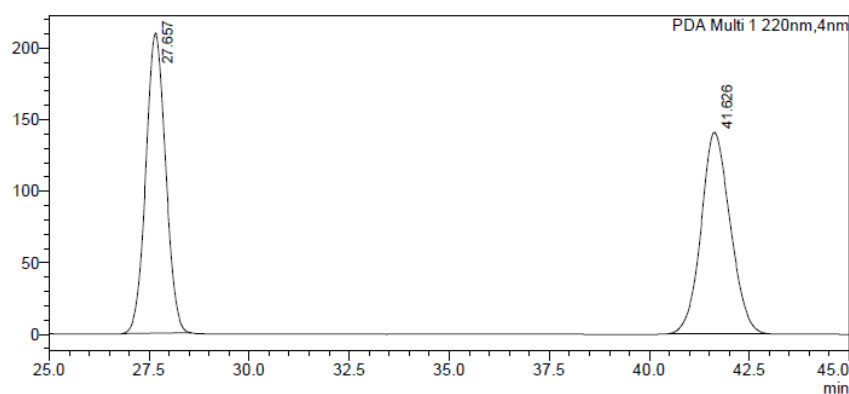

#### <Peak Table>

| PDA Ch1 220nm |           |         |
|---------------|-----------|---------|
| Peak#         | Ret. Time | Area%   |
| 1             | 27.657    | 50.313  |
| 2             | 41.626    | 49.687  |
| Total         |           | 100.000 |

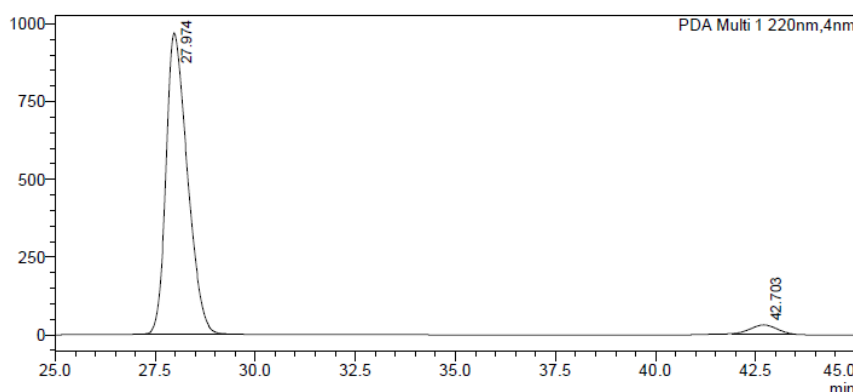

#### <Peak Table>

| PDA Ch1 220nm |           |         |
|---------------|-----------|---------|
| Peak#         | Ret. Time | Area%   |
| 1             | 27.974    | 96.720  |
| 2             | 42.703    | 3.280   |
| Total         |           | 100.000 |

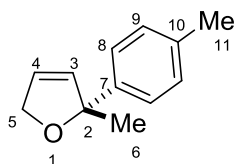

### (R)-2-methyl-2-(p-tolyl)-2,5-dihydrofuran (3ad)

Prepared according to **GP2** using 5-methyl-2,3-dihydrofuran (**1a**). Isolated by column chromatography (Cyclohexane:AcOEt 70:1) as a pale yellow oil (47% yield, 92% *ee*) with  $R_f = 0.58$  (Cyclohexane:AcOEt 10:1);  $^1\text{H-NMR}$  ( $\text{C}_6\text{D}_6$ , 400 MHz)  $\delta$  (ppm) = 1.62 (s, 3H, H-6), 2.13 (s, 3H, H-11), 4.52 (ddd,  $^2J_{\text{H-H}} = 12.9$  Hz,  $^3J_{\text{H-H}} = 2.4$  Hz,  $^4J_{\text{H-H}} = 1.7$  Hz, 1H, H-5), 4.59 (ddd,  $^2J_{\text{H-H}} = 12.9$  Hz,  $^3J_{\text{H-H}} = 2.4$  Hz,  $^4J_{\text{H-H}} = 1.7$  Hz, 1H, H-5'), 5.37 (dt,  $^3J_{\text{H-H}} = 6.0$  Hz,  $^4J_{\text{H-H}} = 1.6$  Hz, 1H, H-3), 5.73 (dt,  $^3J_{\text{H-H}} = 6.0$  Hz,  $^3J_{\text{H-H}} = 2.4$  Hz, 1H, H-4), 7.04 (m, 2H, H-9), 7.36 (m, 2H, H-8);  $^{13}\text{C}\{^1\text{H}\}$ -NMR ( $\text{C}_6\text{D}_6$ , 100 MHz):  $\delta$  (ppm) = 21.0 (C-11), 28.8 (C-6), 74.7 (C-5), 90.7 (C-2), 124.9 (C-3), 125.1 (C-8 or C-9), 128.7 (C-8 or C-9), 134.8 (C-4), 136.1 (C-10), 144.5 (C-7); **HRMS** (ESI positive) calculated for  $\text{C}_{12}\text{H}_{13}\text{O}$ , 173.0961  $[\text{M-H}]^+$ , found 173.0939; **IR spectrum** (neat) ( $\text{cm}^{-1}$ ) = 2973, 1511, 1240, 1078, 1017, 814, 726, 701;  $[\alpha]_D^{23} = +240.7$  (c 0.23,  $\text{CH}_2\text{Cl}_2$ ); **HPLC** : OJ-H, 204 nm, Hexane:*i*PrOH, 98:2, 1 mL/min, 30 °C,  $t_{R1} = 10.8$  and  $t_{R2} = 14.3$  min.

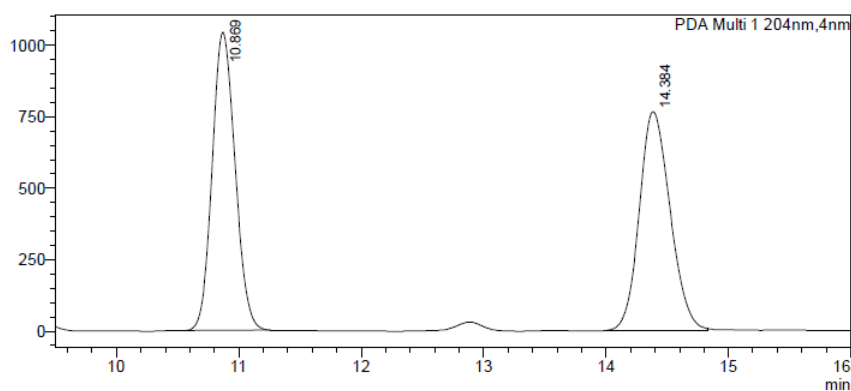

#### <Peak Table>

| PDA Ch1 204nm |           |         |
|---------------|-----------|---------|
| Peak#         | Ret. Time | Area%   |
| 1             | 10.869    | 50.281  |
| 2             | 14.384    | 49.719  |
| Total         |           | 100.000 |

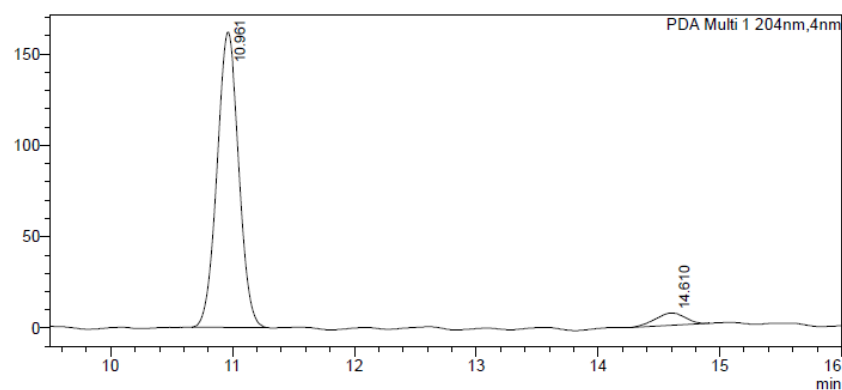

#### <Peak Table>

| PDA Ch1 204nm |           |         |
|---------------|-----------|---------|
| Peak#         | Ret. Time | Area%   |
| 1             | 10.961    | 94.478  |
| 2             | 14.610    | 5.522   |
| Total         |           | 100.000 |

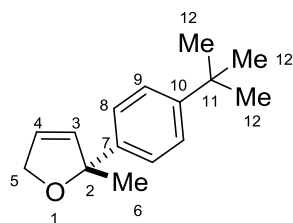

### (R)-2-(4-(tert-butyl)phenyl)-2-methyl-2,5-dihydrofuran (3ae)

Prepared according to **GP2** using 5-methyl-2,3-dihydrofuran (**1a**). Isolated by column chromatography (Cyclohexane:AcOEt 60:1) as a pale yellow oil (65 % yield, 89% *ee*) with  $R_f = 0.50$  (Cyclohexane:AcOEt 10:1);  **$^1\text{H-NMR}$** ( $\text{C}_6\text{D}_6$ , 400 MHz):  $\delta$  (ppm) = 1.24 (s, 9H, H-12), 1.65 (s, 3H, H-6), 4.54 (ddd,  $^2J_{\text{H-H}} = 12.9$  Hz,  $^3J_{\text{H-H}} = 2.4$  Hz,  $^4J_{\text{H-H}} = 1.6$  Hz, 1H, H-5), 4.61 (ddd,  $^2J_{\text{H-H}} = 12.9$  Hz,  $^3J_{\text{H-H}} = 2.4$  Hz,  $^4J_{\text{H-H}} = 1.6$  Hz, 1H, H-5'), 5.38 (dt,  $^3J_{\text{H-H}} = 6.0$  Hz,  $^4J_{\text{H-H}} = 1.6$  Hz, 1H, H-3), 5.76 (dt,  $^3J_{\text{H-H}} = 6.0$  Hz,  $^3J_{\text{H-H}} = 2.4$  Hz, 1H, H-4), 7.32 (m, 2H, H-9), 7.43 (m, 2H, H-8);  **$^{13}\text{C}\{^1\text{H}\}$ -NMR**( $\text{C}_6\text{D}_6$ , 100 MHz):  $\delta$  (ppm) = 28.6 (C-6), 31.2 (C-12), 34.1 (C-11), 74.5 (C-5), 90.5 (C-2), 124.7 (C-3), 124.7 (C-8), 125.1 (C-9), 134.5 (C-4), 144.2 (C-7), 149.1 (C-11); **HRMS** (ESI positive) calculated for  $\text{C}_{15}\text{H}_{21}\text{O}$ , 217.1587  $[\text{M}+\text{H}]^+$ , found 217.1596; **IR spectrum (neat)** ( $\text{cm}^{-1}$ ) = 2961, 1082, 1015, 836, 727, 702, 569;  $[\alpha]_D^{23} = +84.7$  (c 0.62,  $\text{CH}_2\text{Cl}_2$ ); **HPLC**: IC, 203 nm, Hexane:*i*PrOH, 98:2, 1 mL/min, 30 °C,  $t_{R1} = 4.2$  and  $t_{R2} = 5.7$  min.

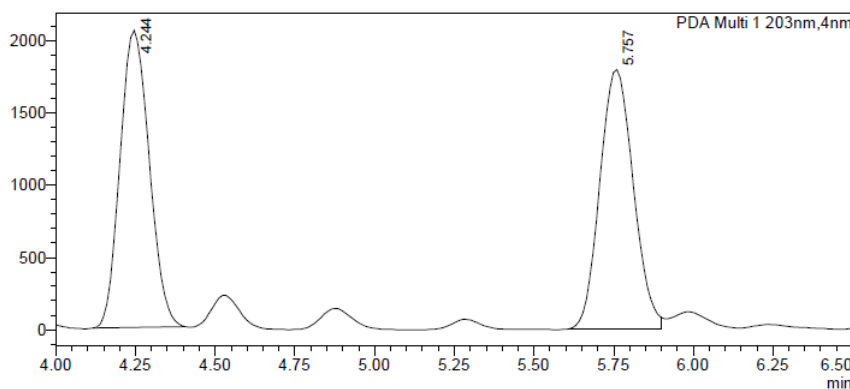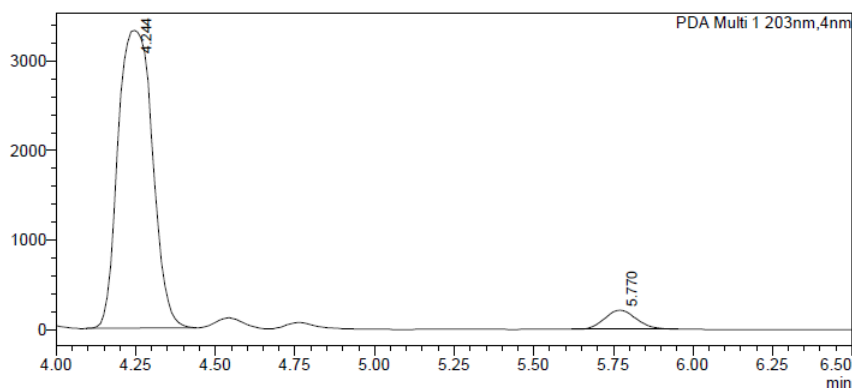

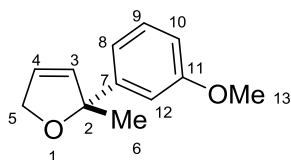

### (R)-2-(3-methoxyphenyl)-2-methyl-2,5-dihydrofuran (3af)

Prepared according to **GP2** using 5-methyl-2,3-dihydrofuran (**1a**). Isolated by column chromatography (Cyclohexane:AcOEt 60:1) as a pale yellow oil (48% yield, 88% *ee*) with  $R_f = 0.50$  (Cyclohexane:AcOEt 10:1);  $^1\text{H-NMR}$  ( $\text{C}_6\text{D}_6$ , 400 MHz):  $\delta$  (ppm) = 1.61 (s, 3H, H-6), 3.36 (s, 3H, H-13), 4.50 (ddd,  $^2J_{\text{H-H}} = 12.9$  Hz,  $^3J_{\text{H-H}} = 2.4$  Hz,  $^4J_{\text{H-H}} = 1.6$  Hz, 1H, H-5), 4.57 (ddd,  $^2J_{\text{H-H}} = 12.9$  Hz,  $^3J_{\text{H-H}} = 2.4$  Hz,  $^4J_{\text{H-H}} = 1.6$  Hz, 1H, H-5'), 5.35 (dt,  $^3J_{\text{H-H}} = 6.0$  Hz,  $^4J_{\text{H-H}} = 1.6$  Hz, 1H, H-3), 5.72 (dt,  $^3J_{\text{H-H}} = 6.0$  Hz,  $^3J_{\text{H-H}} = 2.4$  Hz, 1H, H-4), 6.70 (ddd,  $^3J_{\text{H-H}} = 8.1$  Hz,  $^4J_{\text{H-H}} = 2.6$  Hz,  $^4J_{\text{H-H}} = 0.9$  Hz, 1H, H-8), 7.01 (ddd,  $^3J_{\text{H-H}} = 7.7$  Hz,  $^4J_{\text{H-H}} = 1.6$  Hz,  $^4J_{\text{H-H}} = 1.0$  Hz, 1H, H-10), 7.14 (t,  $^3J_{\text{H-H}} = 7.9$  Hz, 1H, H-9), 7.24 (dd,  $^4J_{\text{H-H}} = 2.6$  Hz,  $^4J_{\text{H-H}} = 1.6$  Hz, 1H, H-12);  $^{13}\text{C}\{^1\text{H}\}$ -NMR( $\text{C}_6\text{D}_6$ , 100 MHz):  $\delta$  (ppm) = 28.6 (C-6), 54.3 (C-13), 74.3 (C-5), 90.5 (C-2), 110.9 (C-9), 111.8 (C-8), 117.1 (C-10), 124.7 (C-3), 129.1 (C-12), 134.1 (C-4), 148.7 (C-7), 160.0 (C-11); **HRMS** (ESI positive) calculated for  $\text{C}_{12}\text{H}_{14}\text{O}_2\text{Li}$ , 197.1148  $[\text{M}+\text{Li}]^+$ , found 197.1144; **IR spectrum (neat)** ( $\text{cm}^{-1}$ ) = 2969, 1601, 1583, 1483, 1432, 1264, 1209, 1080, 1044, 1018, 782, 717, 695;  $[\alpha]_{\text{D}}^{23} = +72.6$  (c 0.55,  $\text{CH}_2\text{Cl}_2$ ); **HPLC**: OJ-H, 209 nm, Hexane:*i*PrOH, 98:2, 1 mL/min, 30 °C,  $t_{\text{R}1} = 15.2$  and  $t_{\text{R}2} = 17.3$  min.

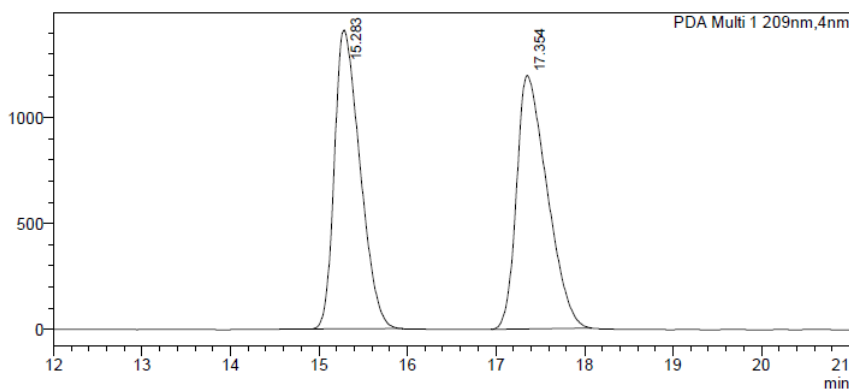

#### <Peak Table>

| PDA Ch1 209nm |           |         |
|---------------|-----------|---------|
| Peak#         | Ret. Time | Area%   |
| 1             | 15.283    | 49.656  |
| 2             | 17.354    | 50.344  |
| Total         |           | 100.000 |

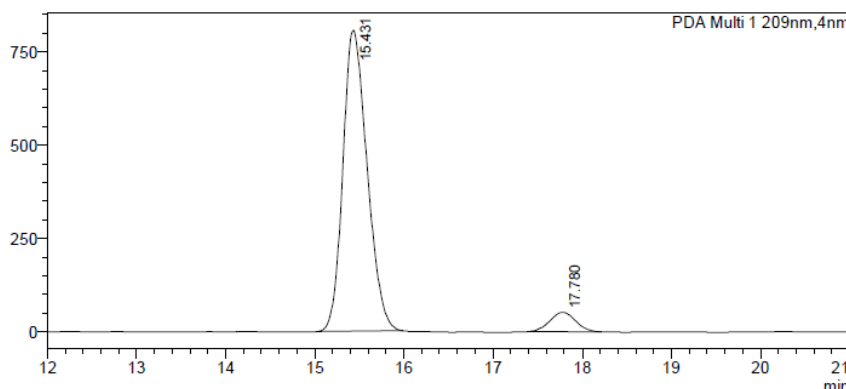

#### <Peak Table>

| PDA Ch1 209nm |           |         |
|---------------|-----------|---------|
| Peak#         | Ret. Time | Area%   |
| 1             | 15.431    | 93.618  |
| 2             | 17.780    | 6.382   |
| Total         |           | 100.000 |

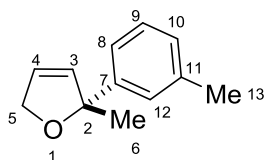

### (R)-2-methyl-2-(m-tolyl)-2,5-dihydrofuran (3ag)

Prepared according to **GP2** using 5-methyl-2,3-dihydrofuran (**1a**). Isolated by column chromatography (Cyclohexane:AcOEt 75:1) as a pale yellow oil (37% yield, 91% *ee*) with  $R_f = 0.52$  (Cyclohexane:AcOEt 10:1);  **$^1\text{H-NMR}$  ( $\text{C}_6\text{D}_6$ , 400 MHz):**  $\delta$  (ppm) = 1.63 (s, 3H, H-6), 2.17 (s, 3H, H-13), 4.53 (ddd,  $^2J_{\text{H-H}} = 12.9$  Hz,  $^3J_{\text{H-H}} = 2.4$  Hz,  $^4J_{\text{H-H}} = 1.6$  Hz, 2H, H-5), 4.60 (ddd,  $^2J_{\text{H-H}} = 12.9$  Hz,  $^3J_{\text{H-H}} = 2.4$  Hz,  $^4J_{\text{H-H}} = 1.6$  Hz, 1H, H-5'), 5.36 (dt,  $^3J_{\text{H-H}} = 6.0$  Hz,  $^4J_{\text{H-H}} = 1.6$  Hz, 1H, H-3), 5.72 (dt,  $^3J_{\text{H-H}} = 6.0$  Hz,  $^3J_{\text{HH}} = 2.5$  Hz, 1H, H-4), 6.93 (m, 1H, H-10), 7.26 (m, 1H, H-8), 7.35 (m, 1H, H-12);  **$^{13}\text{C}\{^1\text{H}\}$ -NMR ( $\text{C}_6\text{D}_6$ , 100 MHz):**  $\delta$  (ppm) = 21.6 (C-13), 29.0 (C-6), 74.7 (C-5), 90.9 (C-2), 122.3 (C-8), 125.0 (C-3), 125.8 (C-12), 127.6 (C-10), 128.4 (C-9), 134.6 (C-4), 137.8 (C-11), 147.3 (C-7); **HRMS** (ESI positive) calculated for  $\text{C}_{12}\text{H}_{13}\text{O}$  173.0961  $[\text{M-H}]^+$ , found 173.0936; **IR spectrum (neat)** ( $\text{cm}^{-1}$ ) = 2974, 2847, 1606, 1485, 1346, 1260, 1189, 1076, 1018, 784, 715, 698;  $[\alpha]_{\text{D}}^{23} = +93.5$  ( $c$  0.55,  $\text{CH}_2\text{Cl}_2$ ); **HPLC:** OJ-H, 203 nm, Hexane:*i*PrOH, 99.5:0.5, 1 mL/min, 30 °C,  $t_{\text{R}1} = 10.2$  and  $t_{\text{R}2} = 11.5$  min.

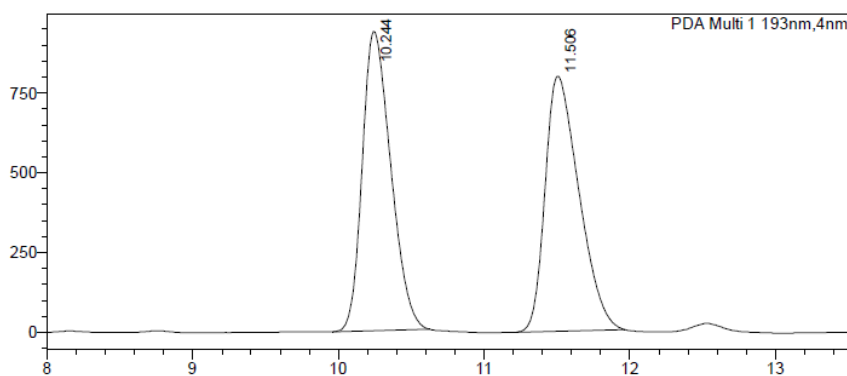

#### <Peak Table>

| PDA Ch1 193nm |           |         |
|---------------|-----------|---------|
| Peak#         | Ret. Time | Area%   |
| 1             | 10.244    | 49.727  |
| 2             | 11.506    | 50.273  |
| Total         |           | 100.000 |

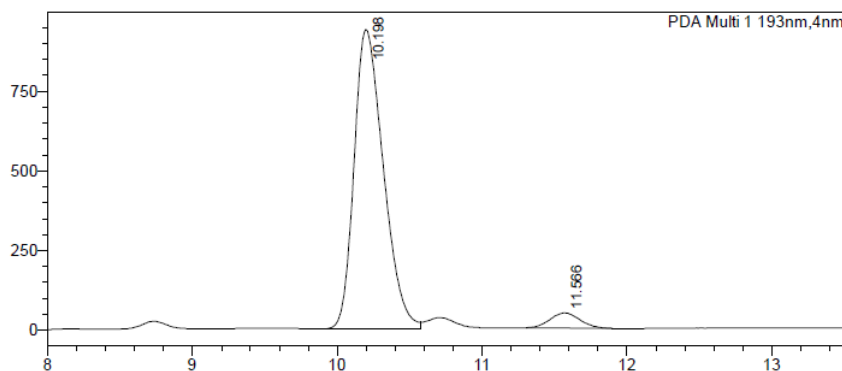

#### <Peak Table>

| PDA Ch1 193nm |           |         |
|---------------|-----------|---------|
| Peak#         | Ret. Time | Area%   |
| 1             | 10.198    | 95.103  |
| 2             | 11.566    | 4.897   |
| Total         |           | 100.000 |

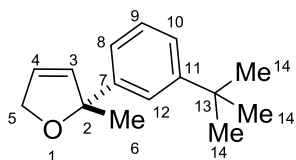

### (R)-2-(3-(tert-butyl)phenyl)-2-methyl-2,5-dihydrofuran (3ah)

Prepared according to **GP2** using 5-methyl-2,3-dihydrofuran (**1a**). Isolated by column chromatography (Cyclohexane:AcOEt 60:1) as a pale yellow oil (56% yield, 90% *ee*) with  $R_f = 0.62$  (Cyclohexane:AcOEt 10:1);  $^1\text{H-NMR}$  ( $\text{C}_6\text{D}_6$ , 400 MHz):  $\delta$  (ppm) = 1.27 (s, 9H, H-14), 1.65 (s, 3H, H-6), 4.55 (ddd,  $^2J_{\text{H-H}} = 13.0$  Hz,  $^3J_{\text{H-H}} = 2.4$  Hz,  $^4J_{\text{H-H}} = 1.6$  Hz, 1H, H-5), 4.62 (ddd,  $^2J_{\text{H-H}} = 13.0$  Hz,  $^3J_{\text{H-H}} = 2.4$  Hz,  $^4J_{\text{H-H}} = 1.6$  Hz, 1H, H-5'), 5.38 (dt,  $^3J_{\text{H-H}} = 6.0$  Hz,  $^4J_{\text{H-H}} = 1.6$  Hz, 1H, H-3), 5.79 (dt,  $^3J_{\text{H-H}} = 6.0$  Hz,  $^3J_{\text{H-H}} = 2.4$  Hz, 1H, H-4), 7.21-7.25 (m, 3H, H-8, H-10 and H-12), 7.70 (m, 1H, H-9);  $^{13}\text{C}\{^1\text{H}\}$ -NMR ( $\text{C}_6\text{D}_6$ , 100 MHz):  $\delta$  (ppm) = 28.9 (C-6), 31.3 (C-14), 34.6 (C-13), 74.4 (C-5), 90.4 (C-2), 121.5 (C-9), 122.2, 123.7 and 128.0 (C-8, C-10 and C-12), 124.8 (C-3), 134.5 (C-4), 146.8 (C-7), 150.9 (C-11); HRMS (ESI positive) calculated for  $\text{C}_{15}\text{H}_{21}\text{O}$ , 217.1587  $[\text{M}+\text{H}]^+$ , found 217.1581; IR spectrum (neat) ( $\text{cm}^{-1}$ ) = 2962, 1601, 1364, 1225, 1077, 1019, 794, 732, 708;  $[\alpha]_{\text{D}}^{23} = +96.4$  ( $c$  0.61,  $\text{CH}_2\text{Cl}_2$ ); HPLC: IC, 191 nm, Hexane:*i*PrOH, 99.5:0.5, 1 mL/min, 30 °C,  $t_{\text{R}1} = 4.5$  and  $t_{\text{R}2} = 5.4$  min).

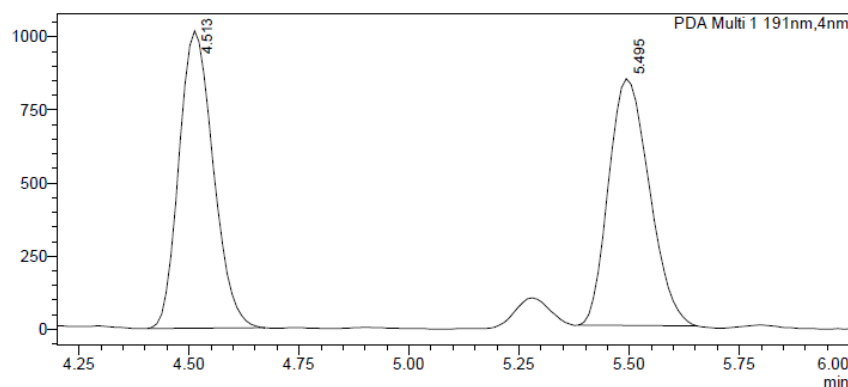

#### <Peak Table>

| PDA Ch1 191nm |           |         |
|---------------|-----------|---------|
| Peak#         | Ret. Time | Area%   |
| 1             | 4.513     | 50.309  |
| 2             | 5.495     | 49.691  |
| Total         |           | 100.000 |

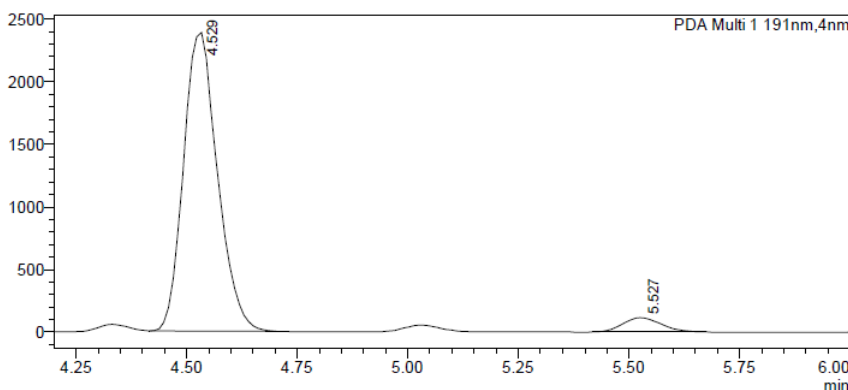

#### <Peak Table>

| PDA Ch1 191nm |           |         |
|---------------|-----------|---------|
| Peak#         | Ret. Time | Area%   |
| 1             | 4.529     | 94.880  |
| 2             | 5.527     | 5.120   |
| Total         |           | 100.000 |

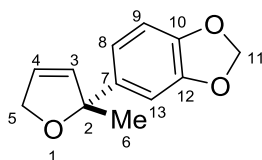

### (R)-2-methyl-2-(3,4-methylenedioxyphenyl)-2,5-dihydrofuran (**3ai**)

Prepared according to **GP2** using 5-methyl-2,3-dihydrofuran (**1a**). Isolated by column chromatography (Cyclohexane:AcOEt 60:1) as a pale yellow oil (54% yield, 88% *ee*) with  $R_f = 0.47$  (Cyclohexane:AcOEt 10:1);  **$^1\text{H-NMR}$  ( $\text{C}_6\text{D}_6$ , 400 MHz):**  $\delta$  (ppm) = 1.55 (s, 3H, H-6), 4.44 (ddd,  $^2J_{\text{H-H}} = 13.0$  Hz,  $^3J_{\text{H-H}} = 6.1$  Hz,  $^4J_{\text{H-H}} = 1.6$  Hz, 2H, H-5), 4.53 (ddd,  $^2J_{\text{H-H}} = 13.0$  Hz,  $^3J_{\text{H-H}} = 6.1$  Hz,  $^4J_{\text{H-H}} = 1.6$  Hz, 1H, H-5'), 5.32 (s, 2H, H-11), 5.33 (m, 1H, H-3), 5.62 (dt,  $^3J_{\text{H-H}} = 6.0$  Hz,  $^3J_{\text{H-H}} = 2.4$  Hz, 1H, H-4), 6.68 (d,  $^3J_{\text{H-H}} = 8.0$  Hz, 1H, H-9), 6.80 (dd,  $^3J_{\text{H-H}} = 8.0$  Hz,  $^4J_{\text{H-H}} = 1.7$  Hz 1H, H-8), 7.06 (d,  $^4J_{\text{H-H}} = 1.7$  Hz, 1H, H-13);  **$^{13}\text{C}\{^1\text{H}\}$ -NMR ( $\text{C}_6\text{D}_6$ , 100 MHz):**  $\delta$  (ppm) = 28.7 (C-6), 74.6 (C-5), 90.6 (C-2), 100.8 (C-11), 106.4 (C-13), 108.1 (C-9), 118.1 (C-8), 125.0 (C-3) 134.6 (C-4), 141.6 (C-7), 146.8 (C-10), 148.2 (C-12); **HRMS (ESI positive)** calculated for  $\text{C}_{12}\text{H}_{13}\text{O}_3$ , 205.0859  $[\text{M}+\text{H}]^+$ , found 205.0858; **IR spectrum (neat)** ( $\text{cm}^{-1}$ ) = 1504, 1484, 1432, 1346, 1240, 1078, 1036, 1017, 938, 809, 730, 710;  $[\alpha]_{\text{D}}^{23} = +86.3$  (c 0.90,  $\text{CH}_2\text{Cl}_2$ ); **HPLC:** OJ-H, 206 nm, Hexane:*i*PrOH, 98:2, 1 mL/min, 30 °C,  $t_{\text{R}1} = 18.7$  and  $t_{\text{R}2} = 20.6$  min.

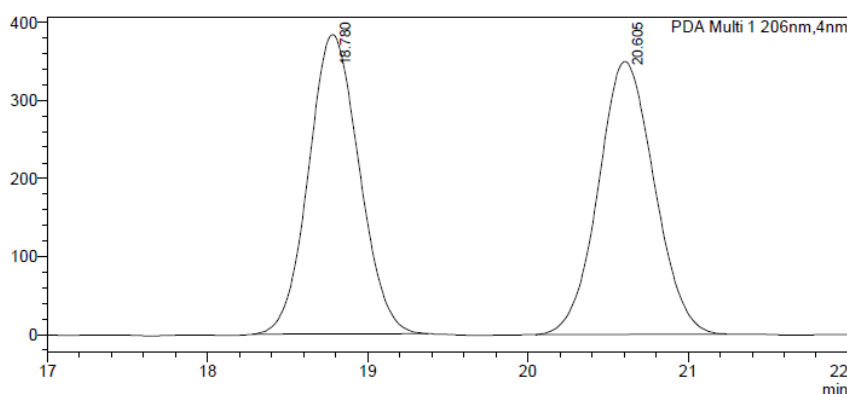

#### <Peak Table>

| PDA Ch1 206nm |           |         |
|---------------|-----------|---------|
| Peak#         | Ret. Time | Area%   |
| 1             | 18.780    | 49.866  |
| 2             | 20.605    | 50.134  |
| Total         |           | 100.000 |

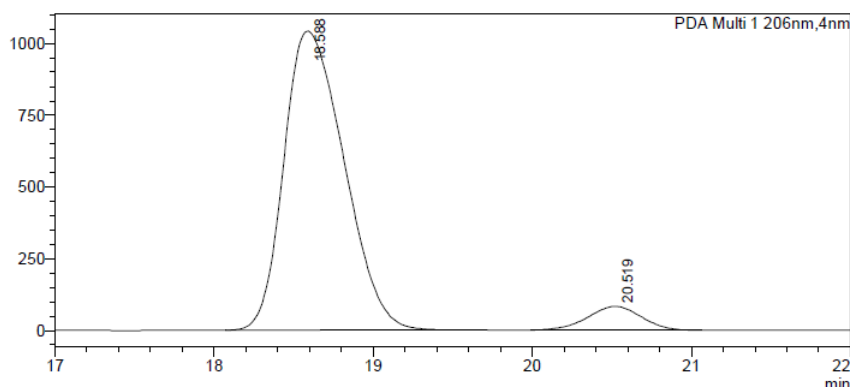

#### <Peak Table>

| PDA Ch1 206nm |           |         |
|---------------|-----------|---------|
| Peak#         | Ret. Time | Area%   |
| 1             | 18.588    | 93.364  |
| 2             | 20.519    | 6.636   |
| Total         |           | 100.000 |

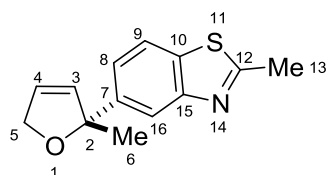

### (R)-2-methyl-2-(2-methyl-5-benzo[d]thiazolyl)-2,5-dihydrofuran (3aj)

Prepared according to **GP2** using 5-methyl-2,3-dihydrofuran (**1a**). Isolated by column chromatography (Cyclohexane:AcOEt 10:1) as a colorless oil (50% yield, >95% purity, 88% *ee*) with  $R_f$  = 0.2 (Cyclohexane:AcOEt 4:1);  **$^1\text{H-NMR}$  ( $\text{C}_6\text{D}_6$ , 400 MHz):**  $\delta$  (ppm) = 1.60 (s, 3H, H-6), 2.35 (s, 3H, H-13), 4.47 (ddd,  $^2J_{\text{H-H}}$  = 13.1 Hz,  $^3J_{\text{H-H}}$  = 2.5 Hz,  $^3J_{\text{H-H}}$  = 1.6 Hz, 1H, H-5), 4.55 (ddd,  $^2J_{\text{H-H}}$  = 13.1 Hz,  $^3J_{\text{H-H}}$  = 2.5 Hz,  $^3J_{\text{H-H}}$  = 1.6 Hz, 1H, H-5'), 5.34 (dt,  $^3J_{\text{H-H}}$  = 6.0 Hz,  $^4J_{\text{H-H}}$  = 1.7 Hz, 1H, H-3), 5.69 (dt,  $^3J_{\text{H-H}}$  = 6.0 Hz,  $^3J_{\text{H-H}}$  = 2.4 Hz, 1H, H-4), 7.36 (dd,  $^3J_{\text{H-H}}$  = 8.4 Hz,  $^4J_{\text{H-H}}$  = 1.8 Hz, 1H, H-8), 7.46 (d,  $^3J_{\text{H-H}}$  = 8.4 Hz, 1H, H-9), 8.29 (d,  $^4J_{\text{H-H}}$  = 1.8 Hz, 1H, H-16);  **$^{13}\text{C}\{^1\text{H}\}$ -NMR ( $\text{C}_6\text{D}_6$ , 100 MHz):**  $\delta$  (ppm) = 19.8 (C-13), 29.0 (C-6), 74.8 (C-5), 90.8 (C-2), 119.4 (C-16), 121.2 (C-9), 122.4 (C-8), 125.3 (C-3), 134.5 (C-4), 134.6 (C-10), 145.8 (C-7), 154.8 (C-15), 166.5 (C-12); **HRMS (EI positive)** calculated for  $\text{C}_9\text{H}_{14}\text{NOS}$ , 232.0791 [M+H] $^+$ , found 232.0794; **IR spectrum (neat)** ( $\text{cm}^{-1}$ ) = 2973, 2925, 1621, 1525, 1417, 1154, 1053, 879, 813, 703, 643;  $[\alpha]_{\text{D}}^{23}$  = +88.0 (c 1.09,  $\text{CH}_2\text{Cl}_2$ ); **HPLC:** OJ-H, 206 nm, Hexane:*i*-PrOH, 98:2, 1 mL/min, 30  $^\circ\text{C}$ ,  $t_{\text{R}1}$  = 22.1 and  $t_{\text{R}2}$  = 27.3 min.

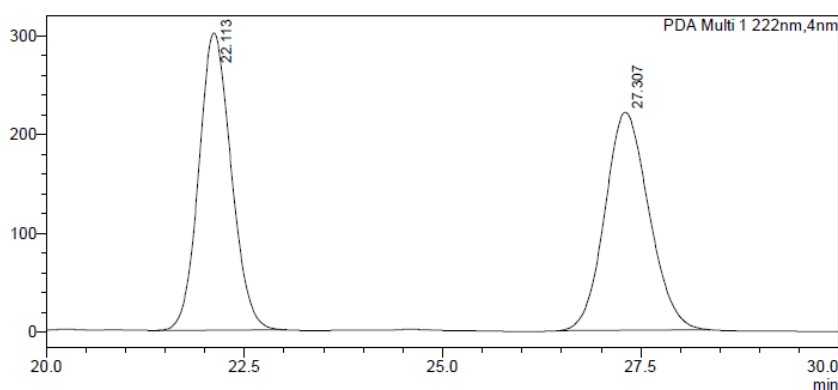

#### <Peak Table>

| PDA Ch1 222nm |           |         |
|---------------|-----------|---------|
| Peak#         | Ret. Time | Area%   |
| 1             | 22.113    | 50.060  |
| 2             | 27.307    | 49.940  |
| Total         |           | 100.000 |

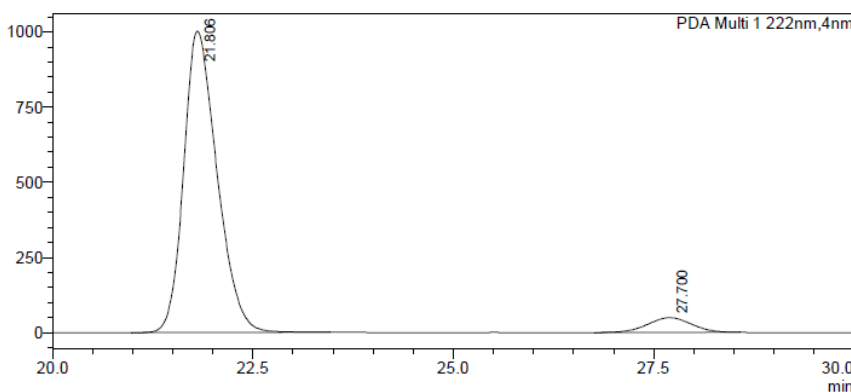

#### <Peak Table>

| PDA Ch1 222nm |           |         |
|---------------|-----------|---------|
| Peak#         | Ret. Time | Area%   |
| 1             | 21.806    | 93.934  |
| 2             | 27.700    | 6.066   |
| Total         |           | 100.000 |



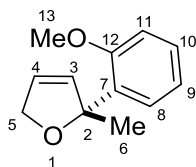

### (R)-2-(2-methoxyphenyl)-2-methyl-2,5-dihydrofuran (3ak)

Prepared according to **GP2** using 5-methyl-2,3-dihydrofuran (**1a**). Isolated by column chromatography (Cyclohexane:AcOEt 80:1) as a colorless oil (53% yield, 90% *ee*) with  $R_f = 0.63$  (Cyclohexane:AcOEt 10:1);  **$^1\text{H-NMR}$  ( $\text{C}_6\text{D}_6$ , 400 MHz):**  $\delta$  (ppm) = 2.87 (s, 3H, H-6), 3.24 (s, 3H, H-13), 4.52 (ddd,  $^2J_{\text{H-H}} = 12.8$  Hz,  $^3J_{\text{H-H}} = 2.6$  Hz,  $^4J_{\text{H-H}} = 1.6$  Hz, 1H, H-5), 4.63 (ddd,  $^2J_{\text{H-H}} = 12.8$  Hz,  $^3J_{\text{H-H}} = 2.6$  Hz,  $^4J_{\text{H-H}} = 1.6$  Hz, 1H, H-5'), 5.41 (dt,  $^3J_{\text{H-H}} = 6.1$  Hz,  $^4J_{\text{H-H}} = 1.6$  Hz, 1H, H-3), 6.52 (m, 2H, H-4 and H-11), 6.98 (td,  $^3J_{\text{H-H}} = 7.5$  Hz,  $^4J_{\text{H-H}} = 1.1$  Hz, 1H, H-9), 7.09 (td,  $^3J_{\text{H-H}} = 7.3$  Hz,  $^4J_{\text{H-H}} = 1.8$  Hz, 1H, H-10), 8.02 (dd,  $^3J_{\text{H-H}} = 7.6$  Hz,  $^4J_{\text{H-H}} = 1.8$  Hz, 1H, H-8);  **$^{13}\text{C}\{^1\text{H}\}$ -NMR ( $\text{C}_6\text{D}_6$ , 100 MHz):**  $\delta$  (ppm) = 27.8 (C-6), 54.6 (C-13), 73.8 (C-5), 90.4 (C-2), 111.2 (C-11), 121.2 (C-9), 124.6 (C-3), 126.2 (C-8), 128.1 (C-10), 134.1 (C-4), 135.4 (C-7), 155.4 (C-12); **IR spectrum (neat)** ( $\text{cm}^{-1}$ ) = 2928, 2867, 1727, 1598, 1583, 1484, 1435, 1362, 1321, 1279, 1236, 1179, 1143, 1111, 1079, 1063, 1019, 865, 811, 786, 752, 706, 651;  $[\alpha]_D^{23} = +148.4$  (c 0.83,  $\text{CH}_2\text{Cl}_2$ ); **HPLC:** OJ-H, 206 nm, Hexane:*i*-PrOH, 99:1, 0.5 mL/min, 30 °C,  $t_{R1} = 11.5$  and  $t_{R2} = 12.3$  min.

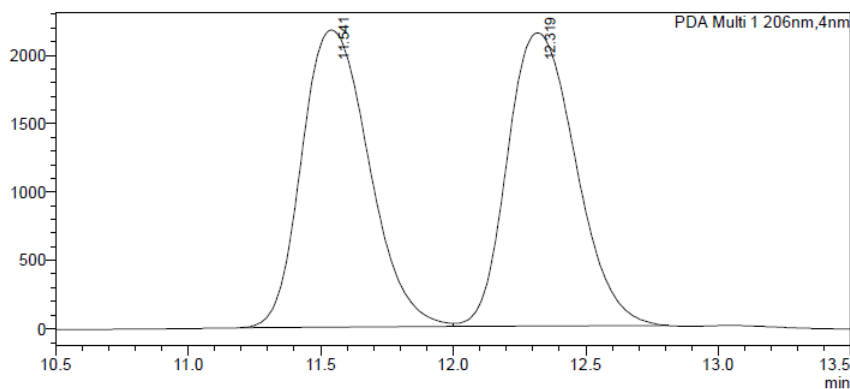

#### <Peak Table>

| PDA Ch1 206nm |           |         |
|---------------|-----------|---------|
| Peak#         | Ret. Time | Area%   |
| 1             | 11.541    | 49.922  |
| 2             | 12.319    | 50.078  |
| Total         |           | 100.000 |

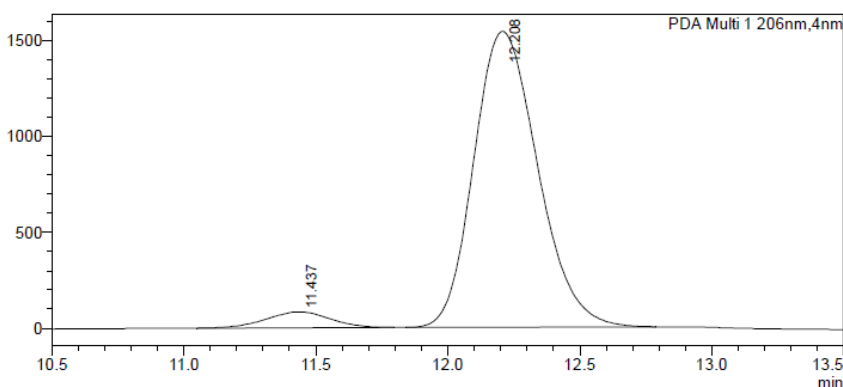

#### <Peak Table>

| PDA Ch1 206nm |           |         |
|---------------|-----------|---------|
| Peak#         | Ret. Time | Area%   |
| 1             | 11.437    | 5.107   |
| 2             | 12.208    | 94.893  |
| Total         |           | 100.000 |

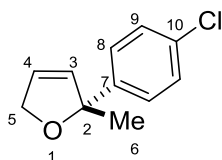

### (R)-2-(2-chlorophenyl)-2-methyl-2,5-dihydrofuran (**3a**)

Prepared according to **GP2** using 5-methyl-2,3-dihydrofuran (**1a**). Isolated by column chromatography (Cyclohexane:AcOEt 60:1) as a colorless oil (25% yield, 92% *ee*) with  $R_F = 0.6$  (Cyclohexane:AcOEt 10:1);  $^1\text{H-NMR}$  ( $\text{C}_6\text{D}_6$ , 400 MHz):  $\delta$  (ppm) = 1.46 (s, 3H, H-6), 4.38 (ddd,  $^2J_{\text{H-H}} = 13.0$  Hz,  $^3J_{\text{H-H}} = 2.4$  Hz,  $^4J_{\text{H-H}} = 1.6$  Hz, 1H, H-5), 4.50 (ddd,  $^2J_{\text{H-H}} = 13.0$  Hz,  $^3J_{\text{H-H}} = 2.4$  Hz,  $^4J_{\text{H-H}} = 1.6$  Hz, 1H, H-5'), 5.31 (dt,  $^3J_{\text{H-H}} = 6.0$  Hz,  $^4J_{\text{H-H}} = 1.6$  Hz, 1H, H-3), 5.55 (dt,  $^3J_{\text{H-H}} = 6.0$  Hz,  $^3J_{\text{H-H}} = 2.4$  Hz, 1H, H-4), 7.11 (m, 4H, H-8 and H-9);  $^{13}\text{C}\{^1\text{H}\}$ -NMR ( $\text{C}_6\text{D}_6$ , 100 MHz):  $\delta$  (ppm) = 28.6 (C-6), 74.7 (C-5), 90.3 (C-2), 125.3 (C-3), 126.6 (C-8 or C-9), 128.6 (C-8 or C-9), 132.7 (C-10), 134.0 (C-4), 145.8 (C-7); IR spectrum (neat) ( $\text{cm}^{-1}$ ) = 2923, 1720, 1489, 1083, 1012, 826, 730, 696, 578;  $[\alpha]_D^{23} = +110.1.0$  (c 0.4,  $\text{CH}_2\text{Cl}_2$ ); HPLC: OJ-H, 193 nm, Hexane:*i*-PrOH, 98:2, 1 mL/min, 30 °C,  $t_{R1} = 7.0$  and  $t_{R2} = 7.4$  min.

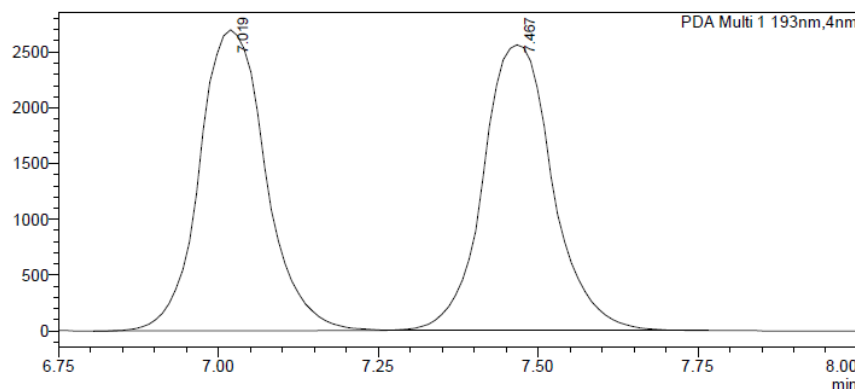

#### <Peak Table>

| PDA Ch1 193nm |           |         |
|---------------|-----------|---------|
| Peak#         | Ret. Time | Area%   |
| 1             | 7.019     | 50.064  |
| 2             | 7.467     | 49.936  |
| Total         |           | 100.000 |

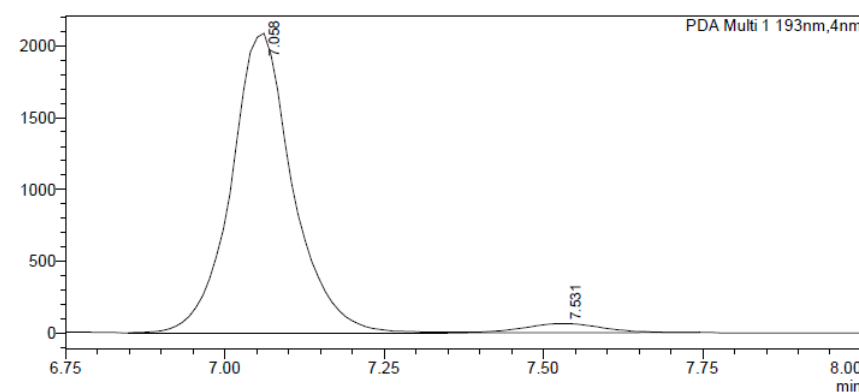

#### <Peak Table>

| PDA Ch1 193nm |           |         |
|---------------|-----------|---------|
| Peak#         | Ret. Time | Area%   |
| 1             | 7.058     | 96.234  |
| 2             | 7.531     | 3.766   |
| Total         |           | 100.000 |

## 4.6 Characterization data of 2-aryl-2-methyl-2,3-dihydrofurans

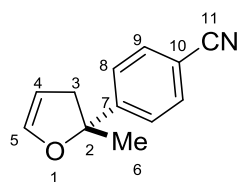**(R)-2-(4-cyanophenyl)-2-methyl-2,3-dihydrofuran (4ac)**

Prepared according to **GP2** using 5-methyl-2,3-dihydrofuran (**1a**). Isolated by column chromatography (Cyclohexane:AcOEt 60:1) as a pale yellow oil (59% yield, 97% *ee*) with  $R_f = 0.42$  (Cyclohexane:AcOEt 10:1);  $^1\text{H-NMR}$  ( $\text{C}_6\text{D}_6$ , 400 MHz):  $\delta$  (ppm) = 1.29 (s, 3H, H-6), 2.32 (m, 2H, H-3), 4.51 (m, 1H, H-4), 6.10 (m, 1H, H-5), 6.95 (m, 2H, H-8), 7.04 (m, 2H, H-9);  $^{13}\text{C}\{^1\text{H}\}$ -NMR ( $\text{C}_6\text{D}_6$ , 100 MHz):  $\delta$  (ppm) = 28.8 (C-6), 44.1 (C-3), 86.7 (C-2), 98.4 (C-4), 111.3 (C-10), 118.8 (C-11), 125.3 (C-8), 132.1 (C-9), 144.4 (C-5), 152.70 (C-7); **HRMS (ESI positive)** calculated for  $\text{C}_{12}\text{H}_{11}\text{NO}$ , 185.08325[M] $^+$ , found 185.08352; **IR spectrum (neat)** ( $\text{cm}^{-1}$ ) = 2927, 2228, 1624, 1607, 1503, 1294, 1160, 1053, 978, 835, 712, 581;  $[\alpha]_D^{23} = +24.2$  (c 1.05,  $\text{CH}_2\text{Cl}_2$ ); **HPLC**: OJ-H, 223 nm, Hexane:*i*PrOH, 98:2, 1 mL/min, 30 °C,  $t_{R1} = 10.1$  and  $t_{R2} = 10.8$  min.

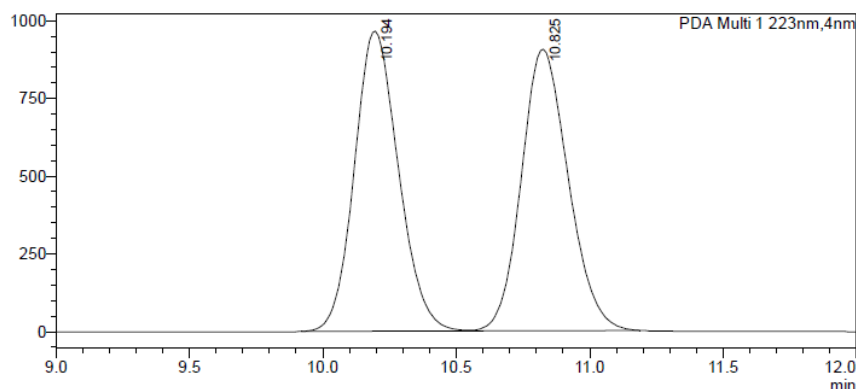

## &lt;Peak Table&gt;

| PDA Ch1 223nm |           |         |
|---------------|-----------|---------|
| Peak#         | Ret. Time | Area%   |
| 1             | 10.194    | 50.012  |
| 2             | 10.825    | 49.988  |
| Total         |           | 100.000 |

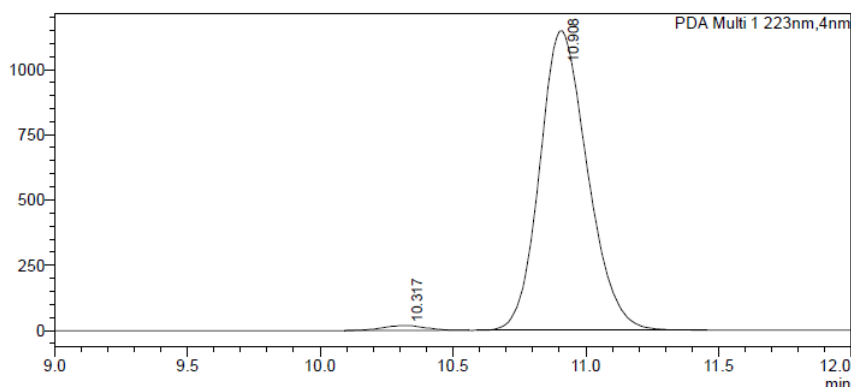

## &lt;Peak Table&gt;

| PDA Ch1 223nm |           |         |
|---------------|-----------|---------|
| Peak#         | Ret. Time | Area%   |
| 1             | 10.317    | 1.416   |
| 2             | 10.908    | 98.584  |
| Total         |           | 100.000 |

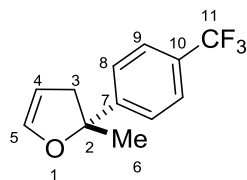

### (R)-2-methyl-2-(4-(trifluoromethyl)phenyl)-2,3-dihydrofuran (4am)

Prepared according to **GP2** using 5-methyl-2,3-dihydrofuran (**1a**). Isolated by column chromatography (Cyclohexane:AcOEt 10:1) as a colorless oil (51% yield, 98% *ee*) with  $R_f = 0.44$  (Cyclohexane:AcOEt 10:1);  $^1\text{H-NMR}$  ( $\text{C}_6\text{D}_6$ , 400 MHz):  $\delta$  (ppm) = 1.38 (s, 3H, H-6), 2.39 (dt,  $^2J_{\text{H-H}} = 15.1$  Hz,  $^3J_{\text{H-H}} = 2.5$  Hz, 1H, H-3), 2.45 (dt,  $^2J_{\text{H-H}} = 15.1$  Hz,  $^3J_{\text{H-H}} = 2.5$  Hz, 1H, H-3'), 4.55-4.57 (m, 1H, H-4), 6.15-6.17 (m, 1H, H-5), 7.15-7.17 (m, 2H, H-8), 7.35-7.37 (m, 2H, H-9);  $^{13}\text{C}\{^1\text{H}\}$ -NMR ( $\text{C}_6\text{D}_6$ , 100 MHz):  $\delta$  (ppm) = 29.2 (C-6), 44.3 (C-3), 86.9 (C-2), 98.5 (C-4), 125.07 (q,  $^1J_{\text{C-F}} = 271.8$  Hz, C-11), 125.3 (C-8), 125.5 (q,  $^3J_{\text{C-F}} = 3.8$  Hz, C-9), 129.2 (q,  $^2J_{\text{C-F}} = 32.2$  Hz, C-10), 144.5 (C-5), 152.2 (C-7); **GC-MS (EI)**: ( $\text{C}_{12}\text{H}_{11}\text{F}_3\text{O}$ ), 228.1 (45,  $\text{M}^+$ ), 213.1 (60), 199.1 (83), 159.1 (100), 115.1 (49), 103.0 (22); **IR spectrum (neat)** ( $\text{cm}^{-1}$ ) = 2978, 2935, 2861, 1620, 1450, 1410, 1324, 1161, 1117, 1054, 1014, 978, 919, 841, 704, 607;  $[\alpha]_{\text{D}}^{23} = +44.9$  ( $c$  0.81,  $\text{CH}_2\text{Cl}_2$ ); **GC**: Lipodex E, 60-20-1-100-20-170, 45 cm/s,  $\text{H}_2$ ,  $t_{\text{R}1} = 30.7$  and  $t_{\text{R}2} = 32.7$  min.

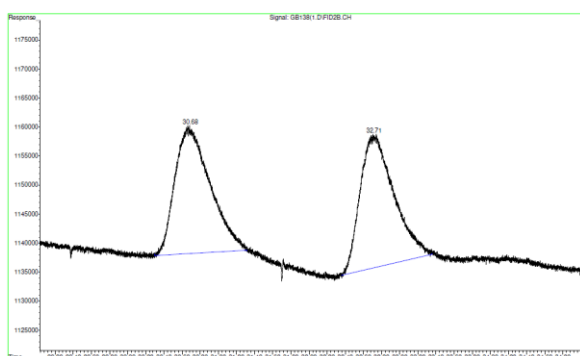

|   |        |        |        |   |       |         |         |         |
|---|--------|--------|--------|---|-------|---------|---------|---------|
| 1 | 30.680 | 30.296 | 31.315 | M | 22032 | 5865242 | 99.10%  | 49.773% |
| 2 | 32.707 | 32.360 | 33.359 | M | 23065 | 5918727 | 100.00% | 50.227% |

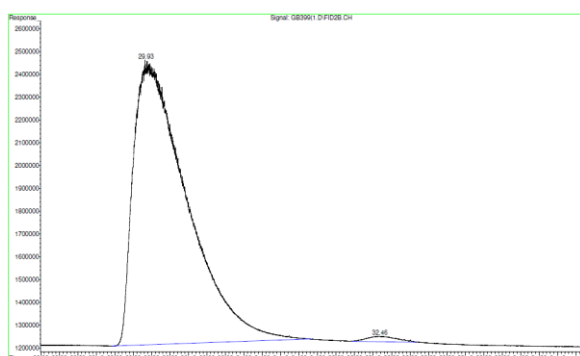

|   |        |        |        |   |         |           |         |         |
|---|--------|--------|--------|---|---------|-----------|---------|---------|
| 1 | 29.930 | 29.597 | 31.813 | M | 1250770 | 502126435 | 100.00% | 99.015% |
| 2 | 32.463 | 32.168 | 32.866 | M | 23974   | 4994602   | 0.99%   | 0.985%  |

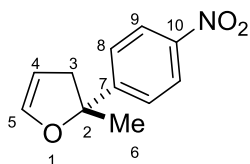

### (R)-2-methyl-2-(4-nitrophenyl)-2,3-dihydrofuran (4a)

Prepared according to **GP2** using 5-methyl-2,3-dihydrofuran (**1a**). Isolated by column chromatography (Cyclohexane:AcOEt 75:1) as a pale yellow oil (54% yield, 98% *ee*) with  $R_f = 0.54$  (Cyclohexane:AcOEt 10:1);  $^1\text{H-NMR}$  ( $\text{C}_6\text{D}_6$ , 400 MHz):  $\delta$  (ppm) = 1.31 (s, 3H, H-6), 2.34 (m, 2H, H-3 and H-3'), 4.52 (m, 1H, H-4), 6.10 (m, 1H, H-5), 6.97 (m, 2H, H-8), 7.83 (m, 2H, H-9);  $^{13}\text{C}\{^1\text{H}\}$ -NMR ( $\text{C}_6\text{D}_6$ , 100 MHz):  $\delta$  (ppm) = 28.9 (C-6), 44.1 (C-3), 86.7 (C-2), 98.5 (C-4), 123.6 (C-9), 125.4 (C-8), 144.4 (C-5), 147.2 (C-10), 154.6 (C-7); **HRMS (ESI positive)** calculated for  $\text{C}_{11}\text{H}_{11}\text{NO}_3$ , 205.2130  $[\text{M}]^+$ , found 205.3; **IR spectrum (neat)** ( $\text{cm}^{-1}$ ) = 1603, 1518, 1160, 1052, 853, 699;  $[\alpha]_D^{23} = +16.1$  (c 0.81,  $\text{CH}_2\text{Cl}_2$ ); **HPLC**: OD-H, 264 nm, Hexane:*i*PrOH, 99.5:0.5, 1 mL/min, 30 °C,  $t_{R1} = 9.5$  and  $t_{R2} = 10.3$  min.

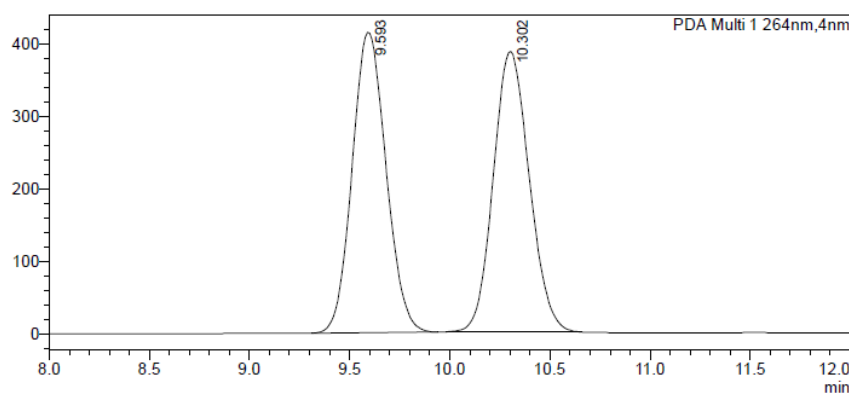

#### <Peak Table>

| PDA Ch1 264nm |           |         |
|---------------|-----------|---------|
| Peak#         | Ret. Time | Area%   |
| 1             | 9.593     | 50.166  |
| 2             | 10.302    | 49.834  |
| Total         |           | 100.000 |

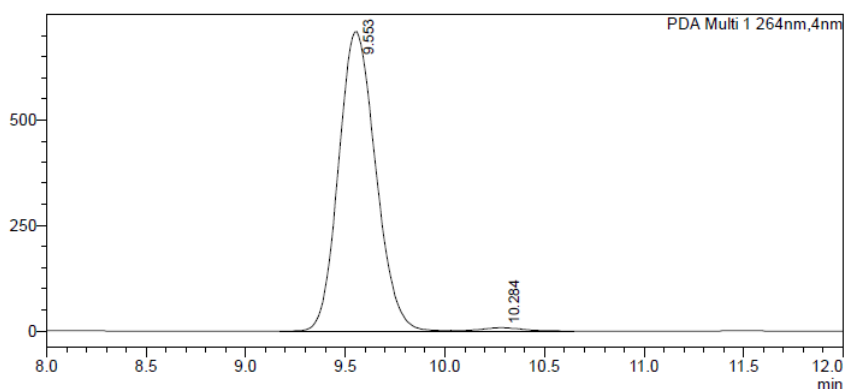

#### <Peak Table>

| PDA Ch1 264nm |           |         |
|---------------|-----------|---------|
| Peak#         | Ret. Time | Area%   |
| 1             | 9.553     | 98.871  |
| 2             | 10.284    | 1.129   |
| Total         |           | 100.000 |

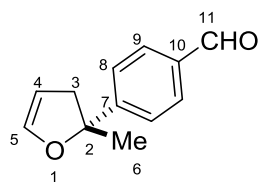

### (R)-2-(4-formylphenyl)-2-methyl-2,3-dihydrofuran (4ao)

Prepared according to **GP2** using 5-methyl-2,3-dihydrofuran (**1a**). Isolated by column chromatography (Cyclohexane:AcOEt 60:1) as a pale yellow oil (35% yield, 97% *ee*) with  $R_f = 0.48$  (Cyclohexane:AcOEt 10:1);  $^1\text{H-NMR}$  ( $\text{C}_6\text{D}_6$ , 400 MHz):  $\delta$  (ppm) = 1.40 (s, 3H, H-6), 2.41 (dt,  $^2J_{\text{H-H}} = 14.8$  Hz,  $^3J_{\text{H-H}} = 2.4$  Hz, 1H, H-3), 2.46 (dt,  $^2J_{\text{H-H}} = 14.8$  Hz,  $^3J_{\text{H-H}} = 2.4$  Hz, 1H, H-3'), 4.55 (m, 1H, H-4), 6.17 (m, 1H, H-5), 7.24 (m, 2H, H-8), 7.56 (m, 2H, H-9), 9.68 (s, 1H, H-11);  $^{13}\text{C}\{^1\text{H}\}$ -NMR ( $\text{C}_6\text{D}_6$ , 100 MHz):  $\delta$  (ppm) = 29.1 (C-6), 44.2 (C-3), 87.1 (C-2), 98.5 (C-4), 125.3 (C-8), 129.8 (C-9), 135.8 (C-10), 144.5 (C-5), 154.3 (C-10), 190.9 (C-11); **MS (ESI)**:  $\text{C}_{12}\text{H}_{12}\text{O}_2$ , 189.3  $[\text{M}+\text{H}]^+$ ; **IR spectrum (neat)** ( $\text{cm}^{-1}$ ) = 1698, 1607, 1211, 1161, 1053, 827, 705, 568;  $[\alpha]_D^{23} = +15.4$  (*c* 0.55,  $\text{CH}_2\text{Cl}_2$ ); **HPLC**: OJ-H, 246 nm, Hexane:*i*PrOH, 98:2, 1 mL/min, 30 °C,  $t_{R1} = 12.6$  and  $t_{R2} = 14.0$  min.

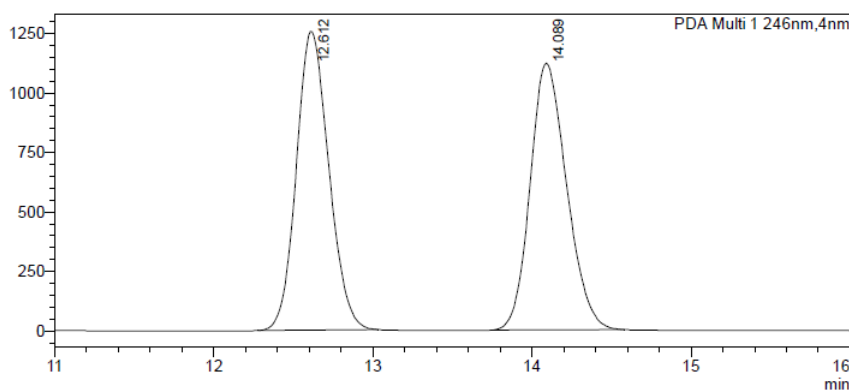

#### <Peak Table>

| PDA Ch1 246nm |           |         |
|---------------|-----------|---------|
| Peak#         | Ret. Time | Area%   |
| 1             | 12.612    | 49.941  |
| 2             | 14.089    | 50.059  |
| Total         |           | 100.000 |

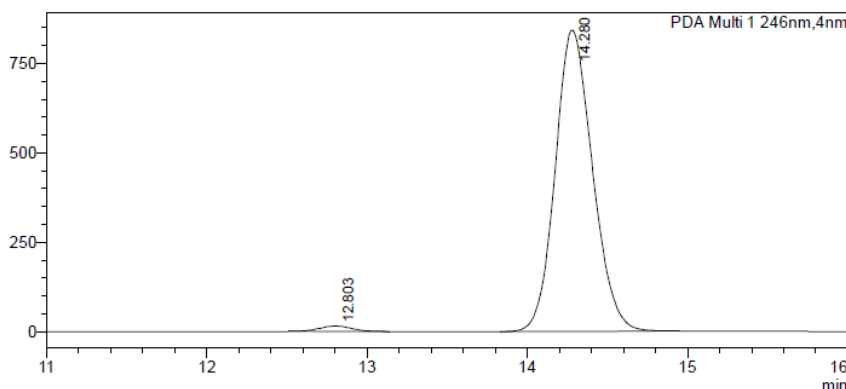

#### <Peak Table>

| PDA Ch1 246nm |           |         |
|---------------|-----------|---------|
| Peak#         | Ret. Time | Area%   |
| 1             | 12.803    | 1.529   |
| 2             | 14.280    | 98.471  |
| Total         |           | 100.000 |

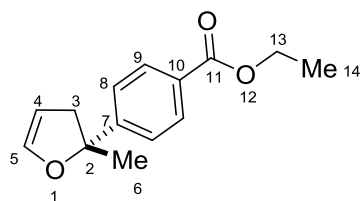

### (R)-2-(4-ethoxycarbonylphenyl)-2-methyl-2,3-dihydrofuran (4ap)

Prepared according to **GP2** using 5-methyl-2,3-dihydrofuran (**1a**). Isolated by column chromatography (Cyclohexane:AcOEt 85:1) as a pale yellow oil (40% yield, 92% *ee*) with  $R_f = 0.53$  (Cyclohexane:AcOEt 10:1);  **$^1\text{H-NMR}$  ( $\text{C}_6\text{D}_6$ , 400 MHz):**  $\delta$  (ppm) = 1.03 (t,  $^3J_{\text{H-H}} = 7$  Hz, 3H, H-14), 1.44 (s, 3H, H-6), 2.42 (dt,  $^2J_{\text{H-H}} = 15.0$  Hz,  $^3J_{\text{H-H}} = 2.4$  Hz, 2H, H-3), 2.53 (dt,  $^2J_{\text{H-H}} = 15.0$  Hz,  $^3J_{\text{H-H}} = 2.4$  Hz, 2H, H-3'), 4.14 (c,  $^3J_{\text{H-H}} = 7$  Hz, 2H, H-13), 4.56 (m, 1H, H-4), 6.18 (m, 1H, H-5), 7.32 (m, 2H, H-8), 8.19 (m, 2H, H-9);  **$^{13}\text{C}\{^1\text{H}\}$ -NMR ( $\text{C}_6\text{D}_6$ , 100 MHz):**  $\delta$  (ppm) = 13.1 (C-13), 27.9 (C-6), 43.1 (C-3), 59.5 (C-12), 86.0 (C-2), 97.2 (C-4), 123.7 (C-8), 128.6 (C-10), 128.8 (C-9), 143.3 (C-5), 151.9 (C-7), 164.9 (C-11); **HRMS (ESI positive)** calculated for  $\text{C}_{14}\text{H}_{16}\text{O}_3$ , 233.1172 [M+H] $^+$ , found 233.1167; **IR spectrum (neat)** ( $\text{cm}^{-1}$ ) = 1714, 1613, 1270, 1162, 1104, 1054, 1019, 858, 773, 705;  $[\alpha]_D^{23} = +10.0$  (c 0.87,  $\text{CH}_2\text{Cl}_2$ ); **HPLC:** OJ-H, 226 nm, Hexane:*i*PrOH, 98:2, 1 mL/min, 30 °C,  $t_{R1} = 11.3$  and  $t_{R2} = 12.3$  min.

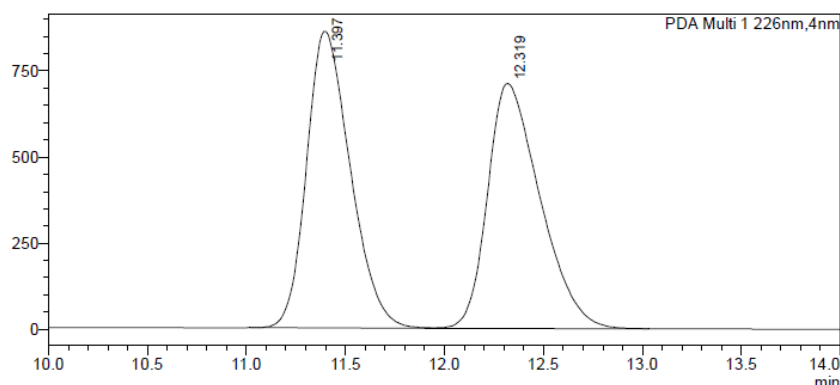

#### <Peak Table>

| PDA Ch1 226nm |           |         |
|---------------|-----------|---------|
| Peak#         | Ret. Time | Area%   |
| 1             | 11.397    | 50.286  |
| 2             | 12.319    | 49.714  |
| Total         |           | 100.000 |

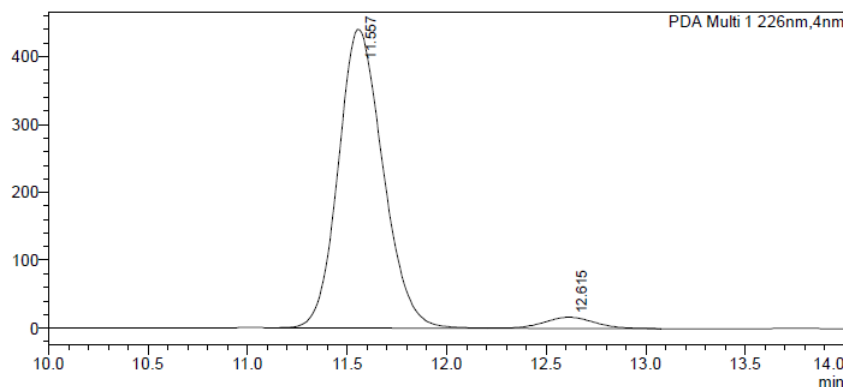

#### <Peak Table>

| PDA Ch1 226nm |           |         |
|---------------|-----------|---------|
| Peak#         | Ret. Time | Area%   |
| 1             | 11.557    | 96.005  |
| 2             | 12.615    | 3.995   |
| Total         |           | 100.000 |

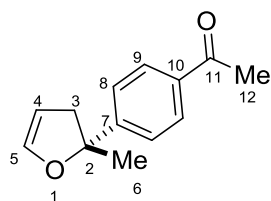

### (R)-2-methyl-2-(4-methylcarbonylphenyl)-2,3-dihydrofuran (4aq)

Prepared according to **GP2** using 5-methyl-2,3-dihydrofuran (**1a**). Isolated by column chromatography (Cyclohexane:AcOEt 60:1) as a pale yellow oil (45% yield with 95% purity, 72% *ee*) with  $R_f = 0.35$  (Cyclohexane:AcOEt 10:1);  $^1\text{H-NMR}$  ( $\text{C}_6\text{D}_6$ , 400 MHz):  $\delta$  (ppm) = 1.46 (s, 3H, H-6), 2.12 (s, 3H, H-12), 2.44 (dt,  $^2J_{\text{H-H}} = 15.2$  Hz,  $^3J_{\text{H-H}} = 2.4$  Hz, 2H, H-3), 2.56 (dt,  $^2J_{\text{H-H}} = 15.2$  Hz,  $^3J_{\text{H-H}} = 2.4$  Hz, 2H, H-3'), 4.58 (m, 1H, H-4), 6.21 (m, 1H, H-5), 7.28 (m, 2H, H-8), 7.80 (m, 2H, H-9);  $^{13}\text{C}\{^1\text{H}\}$ -NMR ( $\text{C}_6\text{D}_6$ , 100 MHz):  $\delta$  (ppm) = 26.1 (C-12), 29.1 (C-6), 44.3 (C-3), 87.2 (C-2), 98.5 (C-4), 124.9 (C-8), 128.7 (C-9), 136.4 (C-10), 144.6 (C-5), 153.0 (C-7), 196.1 (C-11); **HRMS (ESI positive)** calculated for  $\text{C}_{13}\text{H}_{15}\text{O}_2$ , 203.1067 [M+H] $^+$ , found 203.1070; **IR spectrum (neat)** ( $\text{cm}^{-1}$ ) = 1681, 1622, 1607, 1358, 1267, 1161, 1054, 1015, 958, 837, 706, 598;  $[\alpha]_D^{23} = +6.3$  ( $c$  0.87,  $\text{CH}_2\text{Cl}_2$ ); **HPLC**: OJ-H, 206 nm, Hexane:*i*PrOH, 98:2, 1 mL/min, 30 °C,  $t_{R1} = 18.5$  and  $t_{R2} = 20.0$  min.

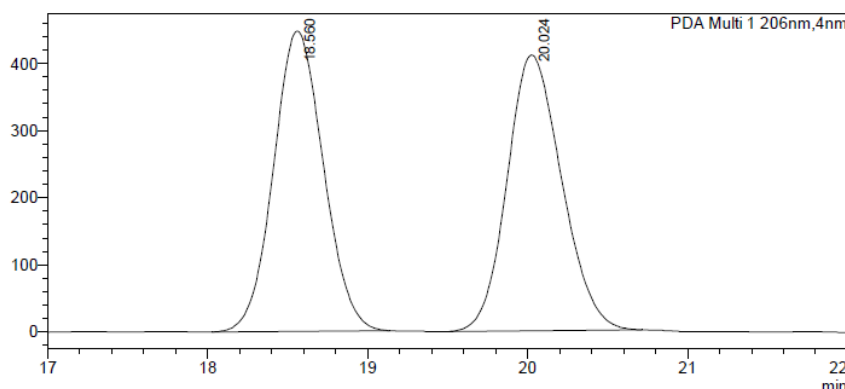

#### <Peak Table>

| PDA Ch1 206nm |           |         |
|---------------|-----------|---------|
| Peak#         | Ret. Time | Area%   |
| 1             | 18.560    | 49.899  |
| 2             | 20.024    | 50.101  |
| Total         |           | 100.000 |

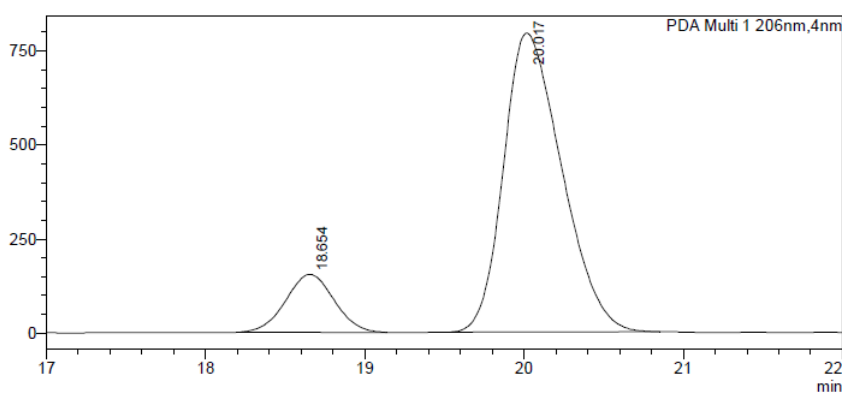

#### <Peak Table>

| PDA Ch1 206nm |           |         |
|---------------|-----------|---------|
| Peak#         | Ret. Time | Area%   |
| 1             | 18.654    | 13.841  |
| 2             | 20.017    | 86.159  |
| Total         |           | 100.000 |



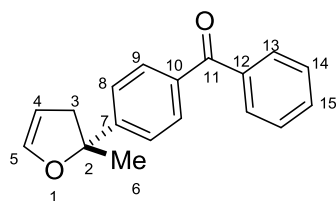

### (R)-2-(benzophenone-4-yl)-2-methyl-2,3-dihydrofuran (4ar)

Prepared according to **GP2** using 5-methyl-2,3-dihydrofuran (**1a**). Isolated by column chromatography (Cyclohexane:AcOEt 85:1) as a pale yellow oil (39% yield, 93% *ee*) with  $R_f = 0.54$  (Cyclohexane:AcOEt 10:1);  $^1\text{H-NMR}$  ( $\text{C}_6\text{D}_6$ , 400 MHz):  $\delta$  (ppm) = 1.47 (s, 3H, H-6), 2.44 (dt,  $^2J_{\text{H-H}} = 15.0$  Hz,  $^3J_{\text{H-H}} = 2.3$  Hz, 2H, H-3), 2.58 (dt,  $^2J_{\text{H-H}} = 15.0$  Hz,  $^3J_{\text{H-H}} = 2.3$  Hz, 2H, H-3'), 4.55 (m, 1H, H-4), 6.20 (m, 1H, H-5), 7.05 (m, 2H, H-14), 7.12 (m, 1H, H-15), 7.28 (m, 2H, H-8), 7.74 (m, 4H, H-9 and H-13);  $^{13}\text{C}\{^1\text{H}\}$ -NMR ( $\text{C}_6\text{D}_6$ , 100 MHz):  $\delta$  (ppm) = 29.2 (C-6), 44.3 (C-3), 87.23 (C-2), 98.5 (C-4), 124.7 (C-8), 128.4 (C-14), 130.2 (C-13 or C-9), 130.4 (C-13 or C-9), 132.1 (C-15), 136.8 (C-10), 138.4 (C-12), 144.6 (C-5), 152.4 (C-7), 195.4 (C-11); **HRMS (ESI positive)** calculated for  $\text{C}_{18}\text{H}_{17}\text{O}_2$ , 265.1223  $[\text{M}+\text{H}]^+$ , found 265.1222; **IR spectrum (neat)** ( $\text{cm}^{-1}$ ) = 1657, 1604, 1446, 1403, 1372, 1313, 1274, 1161, 1053, 922, 851, 698;  $[\alpha]_D^{23} = -4.4$  (c 0.75,  $\text{CH}_2\text{Cl}_2$ ); **HPLC**: OJ-H, 206 nm, Hexane:*i*PrOH, 98:2, 1 mL/min, 30 °C,  $t_{R1} = 15.8$  and  $t_{R2} = 17.1$  min.

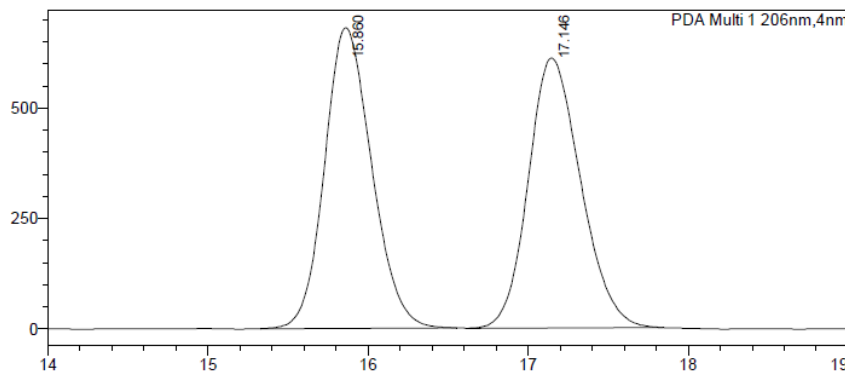

#### <Peak Table>

| PDA Ch1 206nm |           |         |
|---------------|-----------|---------|
| Peak#         | Ret. Time | Area%   |
| 1             | 15.860    | 50.047  |
| 2             | 17.146    | 49.953  |
| Total         |           | 100.000 |

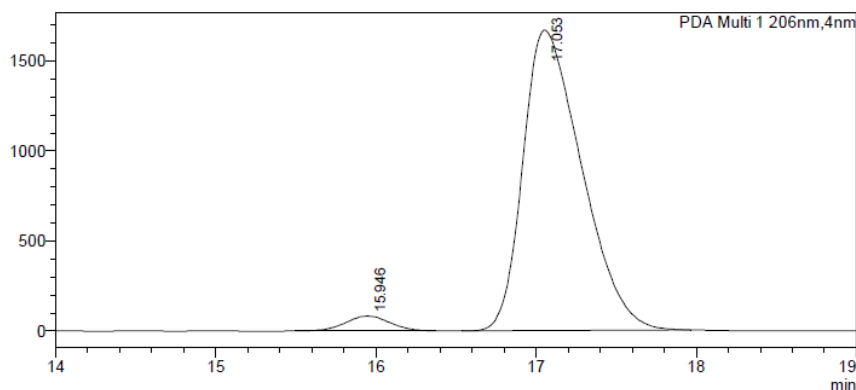

#### <Peak Table>

| PDA Ch1 206nm |           |         |
|---------------|-----------|---------|
| Peak#         | Ret. Time | Area%   |
| 1             | 15.946    | 3.605   |
| 2             | 17.053    | 96.395  |
| Total         |           | 100.000 |

## 4.7 Characterization data of 2-alkyl-2-aryl-2,5-dihydrofurans

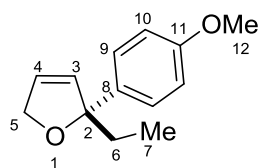**(R)-2-Ethyl-2-(4-methoxyphenyl)-2,5-dihydrofuran (3bb)**

Prepared according to **GP3** using 5-ethyl-2,3-dihydrofuran (**1b**). Isolated by column chromatography (Cyclohexane:AcOEt 80:1) as a colorless oil (61% yield, 92% *ee*) with  $R_f = 0.17$  (Cyclohexane:AcOEt 10:1);  $^1\text{H-NMR}$  ( $\text{C}_6\text{D}_6$ , 400 MHz):  $\delta$  (ppm) = 0.95 (t,  $^3J_{\text{H-H}} = 7.4$  Hz, 3H, H-7), 1.85 (dq,  $^2J_{\text{H-H}} = 14.4$  Hz,  $^3J_{\text{H-H}} = 7.4$  Hz, 1H, H-6), 1.96 (dq,  $^2J_{\text{H-H}} = 14.8$  Hz,  $^3J_{\text{H-H}} = 7.4$  Hz, 1H, H-6'), 3.33 (s, 3H, H-12), 4.52 (ddd,  $^2J_{\text{H-H}} = 12.9$  Hz,  $^3J_{\text{H-H}} = 2.4$  Hz,  $^4J_{\text{H-H}} = 1.7$  Hz, 1H, H-5), 4.57 (ddd,  $^2J_{\text{H-H}} = 12.9$  Hz,  $^3J_{\text{H-H}} = 2.4$  Hz,  $^4J_{\text{H-H}} = 1.7$  Hz, 1H, H-5'), 5.43 (dt,  $^3J_{\text{H-H}} = 6.1$  Hz,  $^4J_{\text{H-H}} = 1.7$  Hz, 1H, H-3), 5.69 (dt,  $^3J_{\text{H-H}} = 6.1$  Hz,  $^3J_{\text{H-H}} = 2.4$  Hz, 1H, H-4), 6.82-6.84 (m, 2H, H-10), 7.31-7.35 (m, 2H, H-9);  $^{13}\text{C}\{^1\text{H}\}$ -NMR ( $\text{C}_6\text{D}_6$ , 100 MHz):  $\delta$  (ppm) = 8.7 (C-7), 34.9 (C-6), 54.8 (C-12), 75.2 (C-5), 93.8 (C-2), 113.9 (C-10), 125.7 (C-3), 126.5 (C-9), 133.0 (C-4), 138.8 (C-8), 159.0 (C-11); **GC-MS (EI)**: ( $\text{C}_{13}\text{H}_{16}\text{O}_2$ ), 204.0 (1,  $\text{M}^+$ ), 175.1 (100,  $\text{M}^+ - 29$ ), 160.0 (23,  $\text{M}^+ - 44$ ); **IR spectrum (neat)** ( $\text{cm}^{-1}$ ) = 2966, 2839, 2610, 1509, 1245, 1176, 1083, 1033, 829, 809, 699;  $[\alpha]_{\text{D}}^{23} = +115.4$  (c 1.00,  $\text{CH}_2\text{Cl}_2$ ); **HPLC**: OJ-H, 226 nm, Hexane:*i*-PrOH, 98:2, 1 mL/min, 30 °C,  $t_{\text{R}1} = 22.6$  and  $t_{\text{R}2} = 24.2$  min.

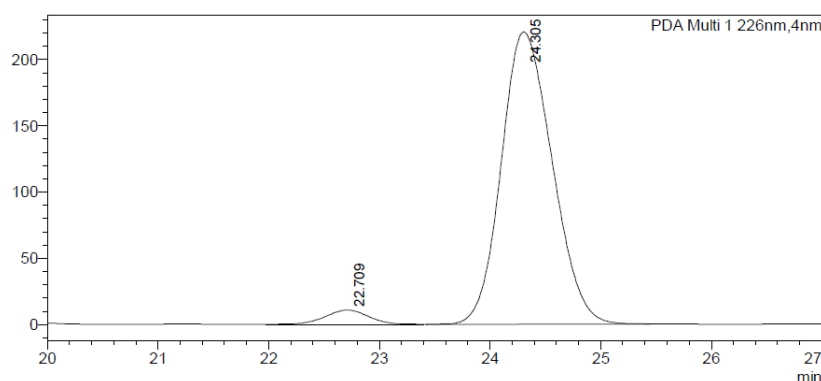

## &lt;Peak Table&gt;

| PDA Ch1 226nm |           |         |
|---------------|-----------|---------|
| Peak#         | Ret. Time | Area%   |
| 1             | 22.610    | 50.440  |
| 2             | 24.241    | 49.560  |
| Total         |           | 100.000 |

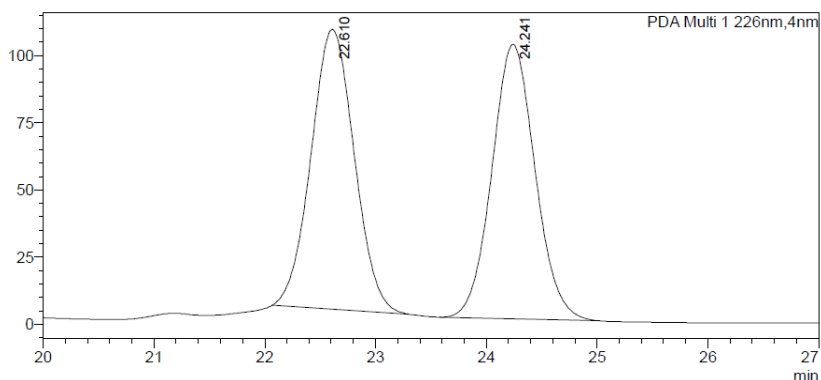

## &lt;Peak Table&gt;

| PDA Ch1 226nm |           |         |
|---------------|-----------|---------|
| Peak#         | Ret. Time | Area%   |
| 1             | 22.709    | 3.927   |
| 2             | 24.305    | 96.073  |
| Total         |           | 100.000 |

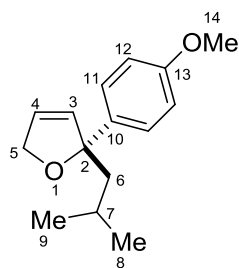

### (*R*)-2-isobutyl-2-(4-methoxyphenyl)-2,5-dihydrofuran (**3cb**)

Prepared according to **GP3** using 5-isobutyl-2,3-dihydrofuran (**1c**). Isolated by column chromatography (Cyclohexane:AcOEt 70:1) as a pale yellow oil (44% yield, 91% *ee*) with  $R_f = 0.65$  (Cyclohexane:AcOEt 10:1);  **$^1\text{H-NMR}$  ( $\text{C}_6\text{D}_6$ , 500 MHz):**  $\delta$  (ppm) = 0.93 (d,  $^3J_{\text{H-H}} = 6.5$  Hz, 3H, H-8 or H-9), 1.02 (d,  $^3J_{\text{H-H}} = 6.4$  Hz, 3H, H-8 or H-9), 1.75 (dd,  $^2J_{\text{H-H}} = 13.7$  Hz,  $^3J_{\text{H-H}} = 6.3$  Hz, 3H, H-6), 1.81 (m, 1H, H-7), 1.90 (dd,  $^2J_{\text{H-H}} = 13.7$  Hz,  $^3J_{\text{H-H}} = 6.3$  Hz, 3H, H-6'), 3.33 (s, 3H, H-14), 4.49 (ddd,  $^2J_{\text{H-H}} = 12.9$  Hz,  $^3J_{\text{H-H}} = 2.3$  Hz,  $^4J_{\text{H-H}} = 1.7$  Hz, 1H, H-5), 4.57 (ddd,  $^2J_{\text{H-H}} = 12.9$  Hz,  $^3J_{\text{H-H}} = 2.3$  Hz,  $^4J_{\text{H-H}} = 1.7$  Hz, 1H, H-5'), 5.38 (dt,  $^3J_{\text{H-H}} = 6.1$  Hz,  $^4J_{\text{H-H}} = 1.6$  Hz, 1H, H-3), 5.75 (dt,  $^3J_{\text{H-H}} = 6.0$  Hz,  $^3J_{\text{H-H}} = 2.4$  Hz, 1H, H-4), 6.84 (m, 2H, H-12), 7.32 (m, 2H, H-11);  **$^{13}\text{C}\{^1\text{H}\}$ -NMR ( $\text{C}_6\text{D}_6$ , 125 MHz):**  $\delta$  (ppm) = 24.5 (C-8 or C-9), 24.7 (C-8 or C-9), 25.0 (C-7), 50.6 (C-6), 54.8 (C-14), 74.8 (C-5), 93.8 (C-2), 113.9 (C-12), 125.0 (C-3), 126.3 (C-11), 134.2 (C-4), 139.1 (C-10), 158.8 (C-13); **MS (ESI):**  $\text{C}_{15}\text{H}_{20}\text{O}_2$ , 233.4  $[\text{M}]^+$ ; **MS (EI positive)** calculated for  $[\text{M}]^+$  233, found 233.4; **IR spectrum (neat)** ( $\text{cm}^{-1}$ ) = 2952, 2837, 1610, 1608, 1463, 1351, 1298, 1245, 1124, 1084, 10396, 530, 831, 807, 735, 701, 651;  $[\alpha]_{\text{D}}^{23} = +100.6$  (c 0.79,  $\text{CH}_2\text{Cl}_2$ ); **HPLC:** OJ-H, 205 nm, Hexane:*i*PrOH, 98:2, 1 mL/min, 30 °C,  $t_{\text{R}1} = 10.0$  and  $t_{\text{R}2} = 11.0$  min.

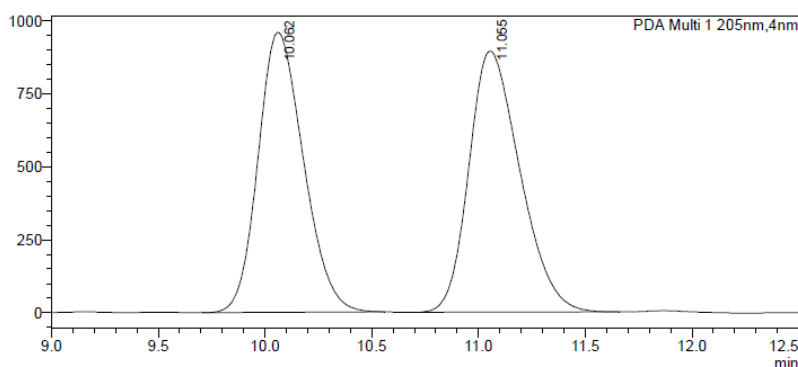

#### <Peak Table>

| PDA Ch1 205nm |           |         |
|---------------|-----------|---------|
| Peak#         | Ret. Time | Area%   |
| 1             | 10.062    | 48.786  |
| 2             | 11.055    | 51.214  |
| Total         |           | 100.000 |

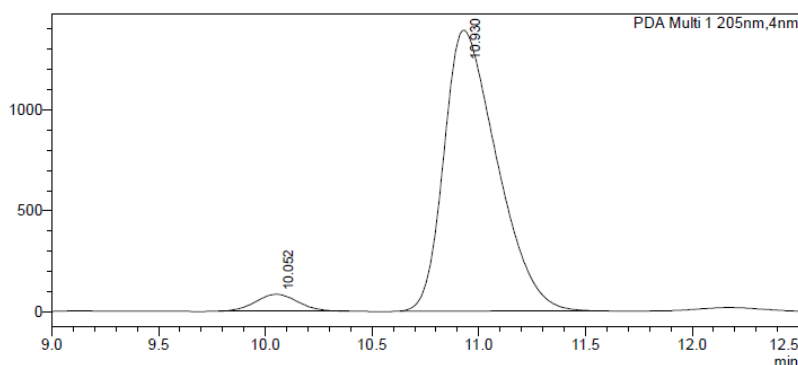

#### <Peak Table>

| PDA Ch1 205nm |           |         |
|---------------|-----------|---------|
| Peak#         | Ret. Time | Area%   |
| 1             | 10.052    | 4.595   |
| 2             | 10.930    | 95.405  |
| Total         |           | 100.000 |

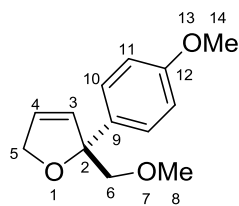

### (R)-2-(Methoxymethyl)-2-(4-methoxyphenyl)-2,5-dihydrofuran (3db)

Prepared according to **GP2** using 5-(methoxymethyl)-2,3-dihydrofuran (**1d**). Isolated by column chromatography (Cyclohexane:AcOEt 10:1) as a colorless oil (64% yield, 91% *ee*) with  $R_f = 0.35$  (Cyclohexane:AcOEt 2:1);  $^1\text{H-NMR}$  ( $\text{C}_6\text{D}_6$ , 400 MHz):  $\delta$  (ppm) = 3.15 (s, 3H, H-8), 3.32 (s, 3H, H-14), 3.58 (d,  $^2J_{\text{H-H}} = 9.9$  Hz, 1H, H-6), 3.61 (d,  $^2J_{\text{H-H}} = 9.9$  Hz, 1H, H-6'), 4.52 (ddd,  $^2J_{\text{H-H}} = 12.8$  Hz,  $^3J_{\text{H-H}} = 2.5$  Hz,  $^3J_{\text{H-H}} = 1.6$  Hz, 1H, H-5), 4.67 (ddd,  $^2J_{\text{H-H}} = 12.8$  Hz,  $^3J_{\text{H-H}} = 2.4$  Hz,  $^3J_{\text{H-H}} = 1.6$  Hz, 1H, H-5'), 5.53 (dt,  $^3J_{\text{H-H}} = 6.1$  Hz,  $^4J_{\text{H-H}} = 1.6$  Hz, 1H, H-3), 5.98 (dt,  $^3J_{\text{H-H}} = 6.1$  Hz,  $^3J_{\text{H-H}} = 2.4$  Hz, 1H, H-4), 6.82-6.86 (m, 2H, H-11), 7.42-7.46 (m, 2H, H-10);  $^{13}\text{C}\{^1\text{H}\}$ -NMR ( $\text{C}_6\text{D}_6$ , 100 MHz):  $\delta$  (ppm) = 54.8 (C-14), 59.3 (C-8), 75.3 (C-5), 79.8 (C-6), 93.3 (C-2), 113.9 (C-11), 126.9 (C-3), 127.2 (C-10), 131.1 (C-4), 136.4 (C-12), 159.3 (C-9); **GC-MS (EI)**: ( $\text{C}_{13}\text{H}_{16}\text{O}_3$ ), 221.0 (9,  $\text{M}^+ + \text{H}$ ), 175.1 (100), 160.1 (25), 147.1 (20), 115.1 (21), 91.0 (15), 77.1 (10); **IR spectrum (neat)** ( $\text{cm}^{-1}$ ) = 2931, 2844, 1610, 1510, 1295, 1176, 1106, 1078, 1024, 828, 706;  $[\alpha]_{\text{D}}^{23} = +4.3$  (c 0.87,  $\text{CH}_2\text{Cl}_2$ ); **HPLC**: OJ-H, 204 nm, Hexane:*i*-PrOH, 98:2, 1 mL/min, 30 °C,  $t_{\text{R}1} = 31.8$  and  $t_{\text{R}2} = 37.1$  min.

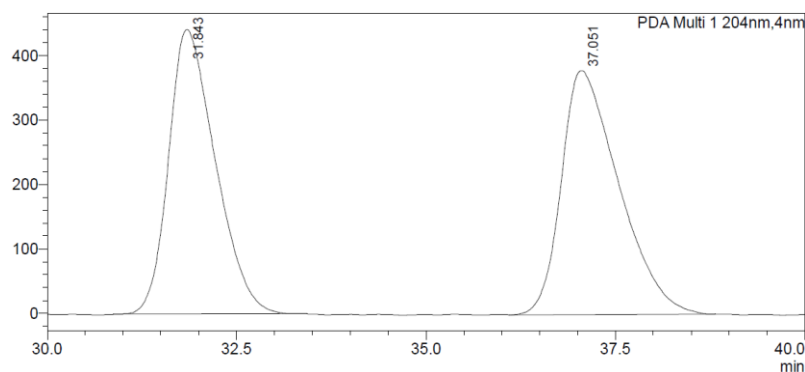

#### <Peak Table>

| PDA Ch1 204nm |           |         |
|---------------|-----------|---------|
| Peak#         | Ret. Time | Area%   |
| 1             | 31.843    | 48.752  |
| 2             | 37.051    | 51.248  |
| Total         |           | 100.000 |

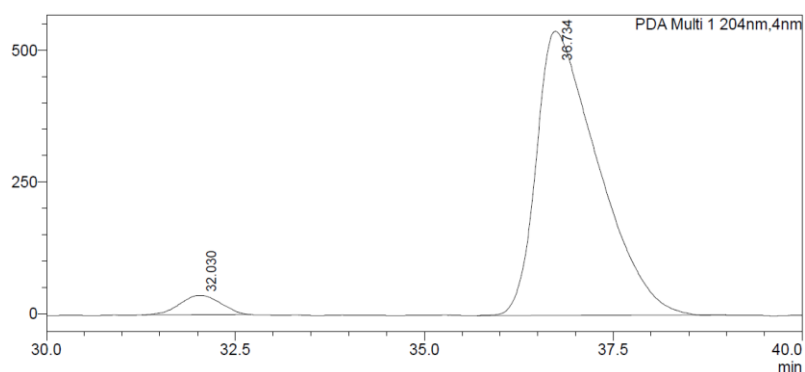

#### <Peak Table>

| PDA Ch1 204nm |           |         |
|---------------|-----------|---------|
| Peak#         | Ret. Time | Area%   |
| 1             | 32.030    | 4.311   |
| 2             | 36.734    | 95.689  |
| Total         |           | 100.000 |

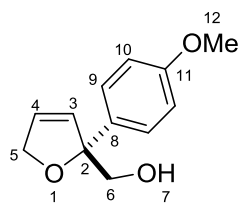

### (R)-2-hydroxymethyl-2-(4-methoxyphenyl)-2,5-dihydrofuran (3eb)

Prepared according to **GP2** using 5-(methanolyl)-2,3-dihydrofuran (**1e**). Isolated by column chromatography (Cyclohexane:AcOEt 3:1) as a pale yellow oil (34% yield, 83% *ee*) with  $R_f = 0.13$  (Cyclohexane:AcOEt 3:1);  $^1\text{H-NMR}$  ( $\text{C}_6\text{D}_6$ , 400 MHz)  $\delta$  (ppm) = 1.72 (dd,  $^3J_{\text{H-H}} = 8.1$  Hz,  $^3J_{\text{H-H}} = 5.2$  Hz, 1H, H-7), 3.30 (s, 3H, H-12), 3.70 (dd,  $^2J_{\text{H-H}} = 11.4$  Hz,  $^3J_{\text{H-H}} = 8.0$  Hz, 1H, H-6), 3.77 (dd,  $^2J_{\text{H-H}} = 11.4$  Hz,  $^3J_{\text{H-H}} = 5.0$  Hz, 1H, H-6'), 4.42 (m, 2H, H-5), 5.46 (dt,  $^3J_{\text{H-H}} = 6.1$  Hz,  $^4J_{\text{H-H}} = 1.7$  Hz, 1H, H-3), 5.74 (dt,  $^3J_{\text{H-H}} = 6.2$  Hz,  $^3J_{\text{H-H}} = 2.4$  Hz, 1H, H-4), 6.79 (m, 2H, H-10), 7.24 (m, 2H, H-9);  $^{13}\text{C}\{^1\text{H}\}$ -NMR ( $\text{C}_6\text{D}_6$ , 100 MHz):  $\delta$  (ppm) = 54.8 (C-12), 69.2 (C-6), 75.4 (C-5), 94.4 (C-2), 113.6 (C-10), 126.8 (C-9), 127.3 (C-3), 130.6 (C-4), 135.4 (C-8), 159.4 (C-11); **MS (ESI)**:  $\text{C}_{12}\text{H}_{14}\text{O}_3$ , 205.1 [M-H] $^+$ ; **IR spectrum (neat)** ( $\text{cm}^{-1}$ ) = 3437, 2853, 1610, 1510, 1460, 1359, 1247, 1176, 1082, 1038, 941, 881, 829, 732, 702, 633, 591;  $[\alpha]_D^{23} = +81.0$  (*c* 0.59,  $\text{CH}_2\text{Cl}_2$ ); **HPLC**: IC, 226 nm, Hexane:*i*PrOH, 95:5, 1 mL/min, 30 °C,  $t_{R1} = 27.8$  and  $t_{R2} = 38.1$  min.

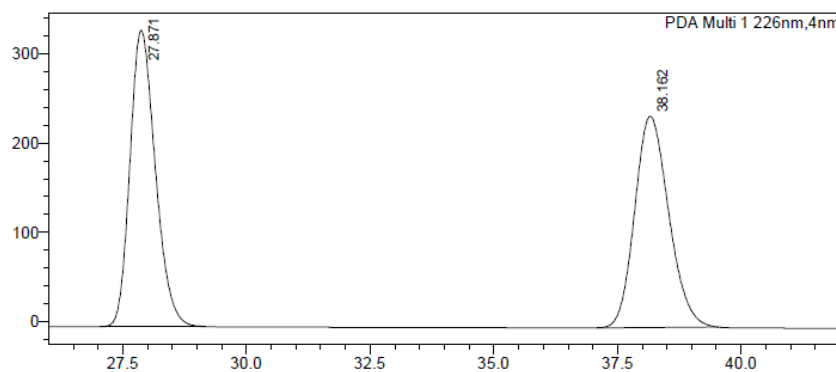

#### <Peak Table>

| PDA Ch1 226nm |           |         |
|---------------|-----------|---------|
| Peak#         | Ret. Time | Area%   |
| 1             | 27.871    | 51.167  |
| 2             | 38.162    | 48.833  |
| Total         |           | 100.000 |

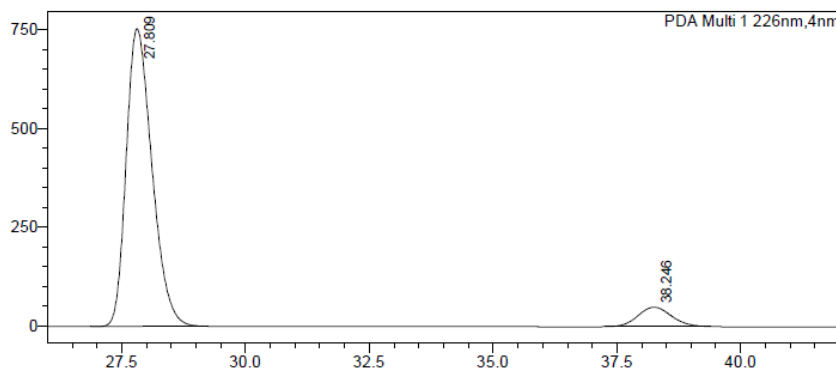

#### <Peak Table>

| PDA Ch1 226nm |           |         |
|---------------|-----------|---------|
| Peak#         | Ret. Time | Area%   |
| 1             | 27.809    | 92.201  |
| 2             | 38.246    | 7.799   |
| Total         |           | 100.000 |

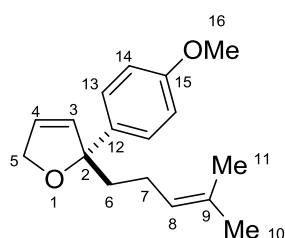

### (*R*)-2-(4-methoxyphenyl)-2-(4-methylpent-3-en-1-yl)-2,5-dihydrofuran (**3fb**)

Prepared according to **GP2** using 5-(4-methylpent-3-en-1-yl)-2,3-dihydrofuran (**1f**). Isolated by column chromatography (Cyclohexane:AcOEt 90:1) as a pale yellow oil (43% yield, 94% *ee*) with  $R_f = 0.58$  (Cyclohexane:AcOEt 10:1);  $^1\text{H-NMR}$  ( $\text{C}_6\text{D}_6$ , 400 MHz):  $\delta$  (ppm) = 1.54 (s, 3H, H-10 or H-11), 1.65 (s, 3H, H-10 or H-11), 1.96 (m, 1H, H-6), 2.06 (m, 1H, H-6'), 2.22 (m, 2H, H-7), 3.33 (s, 3H, H-16), 4.52 (ddd,  $^2J_{\text{H-H}} = 12.9$  Hz,  $^3J_{\text{H-H}} = 2.4$  Hz,  $^4J_{\text{H-H}} = 1.7$  Hz, 1H, H-5), 4.59 (ddd,  $^2J_{\text{H-H}} = 12.9$  Hz,  $^3J_{\text{H-H}} = 2.4$  Hz,  $^4J_{\text{H-H}} = 1.7$  Hz, 1H, H-5'), 5.24 (m, 1H, H-8), 5.42 (dt,  $^3J_{\text{H-H}} = 6.1$  Hz,  $^4J_{\text{H-H}} = 1.6$  Hz, 1H, H-3), 5.74 (dt,  $^3J_{\text{H-H}} = 6.0$  Hz,  $^3J_{\text{H-H}} = 2.4$  Hz, 1H, H-4), 6.84 (m, 2H, H-14), 7.34 (m, 2H, H-13);  $^{13}\text{C}\{^1\text{H}\}$ -NMR ( $\text{C}_6\text{D}_6$ , 100 MHz):  $\delta$  (ppm) = 17.6 (C-10 or C-11), 23.5 (C-7), 25.8 (C-10 or C-11), 42.3 (C-6), 54.8 (C-16), 75.1 (C-5), 93.4 (C-2), 113.9 (C-14), 125.2 (C-8), 125.5 (C-3), 126.4 (C-13), 131.1 (C-9), 133.3 (C-4), 138.8 (C-12), 158.9 (C-15); **MS (ESI)**:  $\text{C}_{17}\text{H}_{22}\text{O}_2$ , 259.5  $[\text{M}+\text{H}]^+$ ; **IR spectrum (neat)** ( $\text{cm}^{-1}$ ) = 2916, 2840, 1619, 1509, 1159, 1377, 1299, 1243, 1175, 1071, 1031, 828, 808, 701, 575;  $[\alpha]_{\text{D}}^{23} = +68.2$  (c 0.91,  $\text{CH}_2\text{Cl}_2$ ); **HPLC**: OJ-H, 205 nm, Hexane:*i*PrOH, 98:2, 1 mL/min, 30 °C,  $t_{\text{R}1} = 15.4$  and  $t_{\text{R}2} = 18.1$  min.

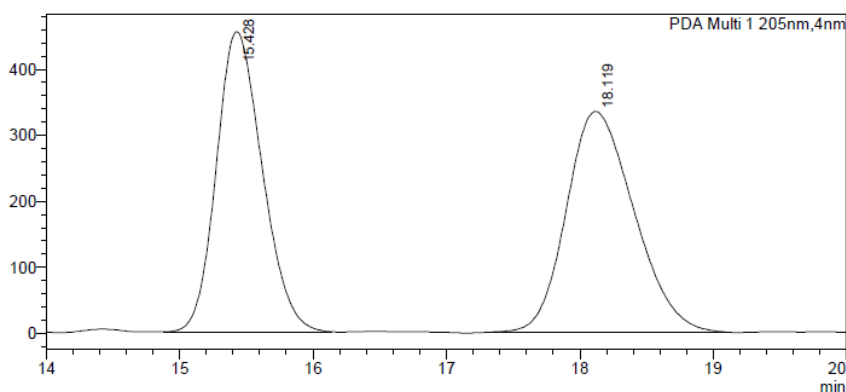

#### <Peak Table>

| PDA Ch1 205nm |           |         |
|---------------|-----------|---------|
| Peak#         | Ret. Time | Area%   |
| 1             | 15.428    | 48.023  |
| 2             | 18.119    | 51.977  |
| Total         |           | 100.000 |

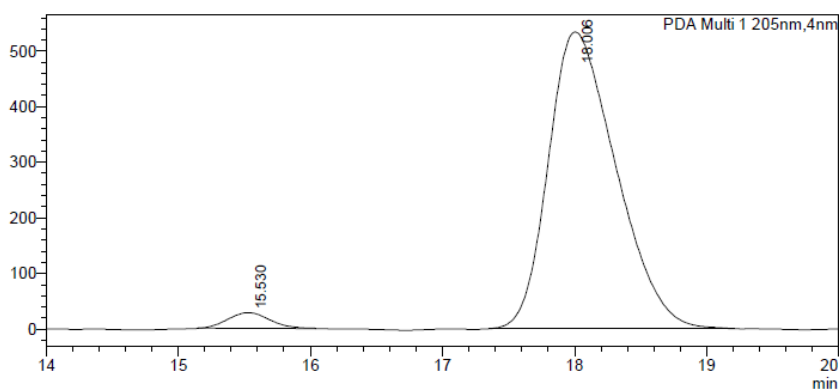

#### <Peak Table>

| PDA Ch1 205nm |           |         |
|---------------|-----------|---------|
| Peak#         | Ret. Time | Area%   |
| 1             | 15.530    | 3.175   |
| 2             | 18.006    | 96.825  |
| Total         |           | 100.000 |

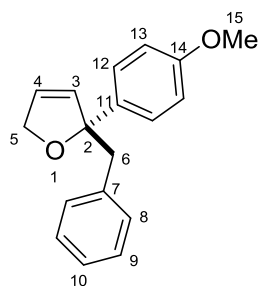

### (*R*)-2-benzyl-2-(4-methoxyphenyl)-2,5-dihydrofuran (**3gb**)

Prepared according to **GP2** using 5-benzyl-2,3-dihydrofuran (**1g**). Isolated by column chromatography (Cyclohexane:AcOEt 70:1) as a pale yellow oil (50% yield, 94% *ee*) with  $R_f = 0.50$  (Cyclohexane:AcOEt 10:1);  **$^1\text{H-NMR}$  ( $\text{C}_6\text{D}_6$ , 400 MHz):**  $\delta$  (ppm) = 3.08 (d,  $^2J_{\text{H-H}} = 13.4$  Hz, 1H, H-6), 3.23 (d,  $^2J_{\text{H-H}} = 13.4$  Hz, 1H, H-6'), 3.31 (s, 3H, H-15), 4.28 (ddd,  $^2J_{\text{H-H}} = 12.8$  Hz,  $^3J_{\text{H-H}} = 2.5$  Hz,  $^4J_{\text{H-H}} = 1.6$  Hz, H-5), 4.40 (ddd,  $^2J_{\text{H-H}} = 12.8$  Hz,  $^3J_{\text{H-H}} = 2.5$  Hz,  $^4J_{\text{H-H}} = 1.6$  Hz, H-5'), 5.28 (dt,  $^3J_{\text{H-H}} = 6.1$  Hz,  $^4J_{\text{H-H}} = 1.6$  Hz, H-3), 5.77 (dt,  $^3J_{\text{H-H}} = 6.1$  Hz,  $^3J_{\text{H-H}} = 2.5$  Hz, H-4), 6.81 (m, 2H, H-13), 7.04 (m, 5H, H-13, H-8 and H-9), 7.30 (m, 2H, H-12);  **$^{13}\text{C}\{^1\text{H}\}$ -NMR ( $\text{C}_6\text{D}_6$ , 100 MHz):**  $\delta$  (ppm) = 48.9 (C-6), 54.7 (C-15), 75.2 (C-5), 93.8 (C-2), 113.8 (C-13), 126.1 (C-3), 126.3 (C-10), 126.7 (C-12), 128.0 (C-8 or C-9), 131.2 (C-8 or C-9), 132.4 (C-4), 138.0 (C-7 or C-11), 138.5 (C-7 or C-11), 159.0 (C-14); **MS (ESI):**  $\text{C}_{18}\text{H}_{18}\text{O}_2$ , 267.5 [M+H] $^+$ ; **IR spectrum (neat)** ( $\text{cm}^{-1}$ ) = 2837, 1605, 1502, 1454, 1346, 1299, 1241, 1174, 1114, 1077, 1035, 994, 953, 903, 837, 813, 724, 695, 637, 568;  $[\alpha]_D^{23} = -225.1$  (c 0.83,  $\text{CH}_2\text{Cl}_2$ ); **HPLC:** OJ-H, 205nm, Hexane:*i*PrOH, 98:2, 1 mL/min, 30 °C,  $t_{R1} = 39.9$  and  $t_{R2} = 45.7$  min.

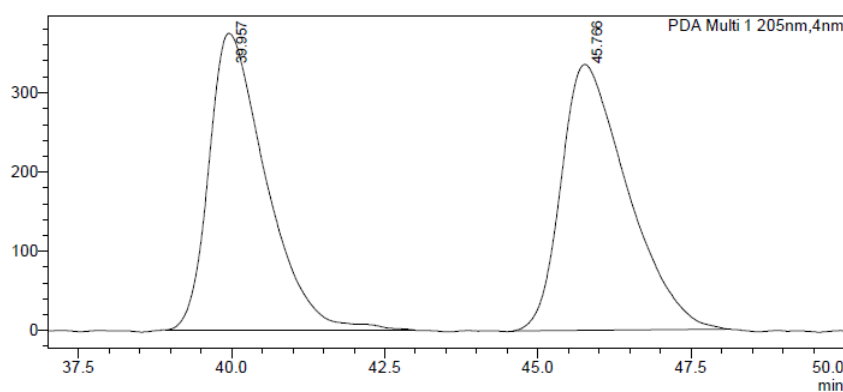

#### <Peak Table>

PDA Ch1 205nm

| Peak# | Ret. Time | Area%   |
|-------|-----------|---------|
| 1     | 39.957    | 48.914  |
| 2     | 45.766    | 51.086  |
| Total |           | 100.000 |

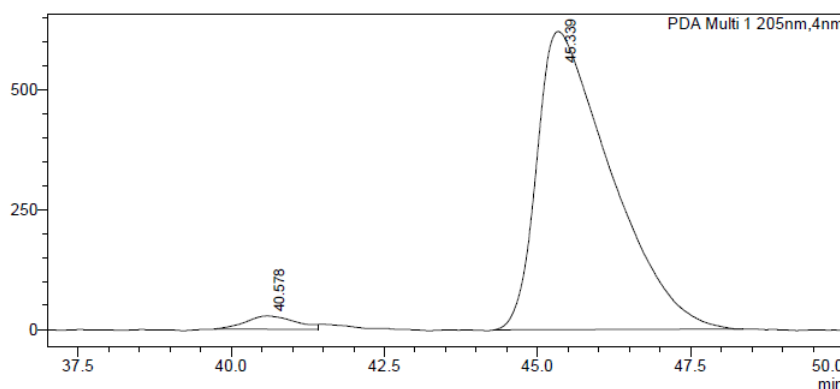

#### <Peak Table>

PDA Ch1 205nm

| Peak# | Ret. Time | Area%   |
|-------|-----------|---------|
| 1     | 40.578    | 2.964   |
| 2     | 45.339    | 97.036  |
| Total |           | 100.000 |

## 4.8 Characterization data of 2-alkyl-2-aryl-2,3-dihydrofurans

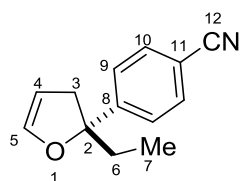**(R)-2-(4-cyanophenyl)-2-ethyl-2,3-dihydrofuran (4bc)**

Prepared according to **GP3** using 5-ethyl-2,3-dihydrofuran (**1b**). Isolated by column chromatography (Cyclohexane:AcOEt 80:1) as a colorless oil (63% yield, 96% *ee*) with  $R_F = 0.44$  (Cyclohexane:AcOEt 10:1);  $^1\text{H-NMR}$  ( $\text{C}_6\text{D}_6$ , 400 MHz):  $\delta$  (ppm) = 0.67 (t,  $^3J_{\text{H-H}} = 7.3$  Hz, 3H, H-7), 1.48 (dq,  $^2J_{\text{H-H}} = 14.5$  Hz,  $^3J_{\text{H-H}} = 7.3$  Hz, 1H, H-6), 1.68 (dq,  $^2J_{\text{H-H}} = 14.5$  Hz,  $^3J_{\text{H-H}} = 7.3$  Hz, 1H, H-6'), 2.29 (dt,  $^2J_{\text{H-H}} = 15.2$  Hz,  $^3J_{\text{H-H}} = 2.4$  Hz, 1H, H-3), 2.40 (dt,  $^2J_{\text{H-H}} = 15.2$  Hz,  $^3J_{\text{H-H}} = 2.4$  Hz, 1H, H-3'), 4.50-4.52 (m, 1H, H-4), 6.09-6.10 (m, 1H, H-5), 6.92-6.94 (m, 2H, H-9), 7.03-7.05 (m, 2H, H-10);  $^{13}\text{C}\{^1\text{H}\}$ -NMR ( $\text{C}_6\text{D}_6$ , 100 MHz):  $\delta$  (ppm) = 8.2 (C-7), 35.1 (C-6), 42.7 (C-3), 89.6 (C-2), 98.6 (C-4), 111.3 (C-11), 118.9 (C-12), 125.8 (C-9), 132.0 (C-10), 144.5 (C-5), 151.7 (C-8); **GC-MS (EI)**: ( $\text{C}_{13}\text{H}_{13}\text{NO}$ ), 199.1 (9,  $\text{M}^+$ ), 170.1 (100), 142.1 (40), 116.1 (30), 115.0 (30), 89.1 (10); **IR spectrum (neat)** ( $\text{cm}^{-1}$ ) = 2971, 2930, 2229, 1625, 1608, 1155, 1055, 840, 707;  $[\alpha]_{\text{D}}^{23} = +33.9$  (c 1.00,  $\text{CH}_2\text{Cl}_2$ ); **HPLC**: OJ-H, 229 nm, Hexane:*i*-PrOH, 98:2, 1 mL/min, 30 °C,  $t_{\text{R}1} = 8.6$  and  $t_{\text{R}2} = 9.3$  min.

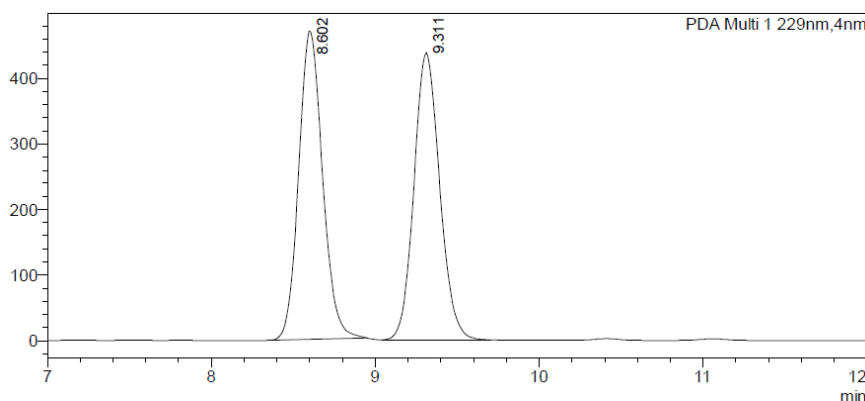

## &lt;Peak Table&gt;

PDA Ch1 229nm

| Peak# | Ret. Time | Area%   |
|-------|-----------|---------|
| 1     | 8.602     | 49.961  |
| 2     | 9.311     | 50.039  |
| Total |           | 100.000 |

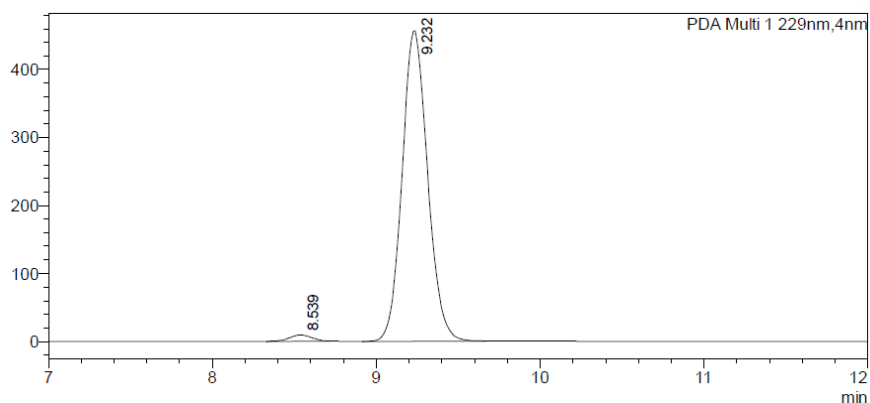

## &lt;Peak Table&gt;

PDA Ch1 229nm

| Peak# | Ret. Time | Area%   |
|-------|-----------|---------|
| 1     | 8.539     | 1.782   |
| 2     | 9.232     | 98.218  |
| Total |           | 100.000 |



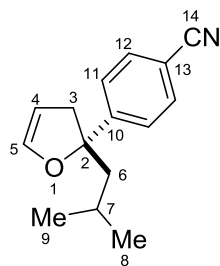

### (R)-2-(4-cyanophenyl)-2-isobutyl-2,3-dihydrofuran (4cc)

Prepared according to **GP3** using 5-isobutyl-2,3-dihydrofuran (**1c**). Isolated by column chromatography (Cyclohexane:AcOEt 90:1) as a pale yellow oil (44% yield, 97% *ee*) with  $R_f = 0.54$  (Cyclohexane:AcOEt 10:1);  **$^1\text{H-NMR}$  ( $\text{C}_6\text{D}_6$ , 400 MHz):**  $\delta$  (ppm) = 0.64 (d,  $^3J_{\text{H-H}} = 6.5$  Hz, 3H, H-8 or H-9), 0.89 (d,  $^3J_{\text{H-H}} = 6.5$  Hz, 3H, H-8 or H-9), 1.45 (m, 2H, H-6 and H-7), 1.65 (dd,  $^2J_{\text{H-H}} = 14.1$  Hz,  $^3J_{\text{H-H}} = 6.7$  Hz, 1H, H-6'), 2.30 (dt,  $^2J_{\text{H-H}} = 15.2$  Hz,  $^3J_{\text{H-H}} = 2.4$  Hz, 1H, H-3), 2.42 (dt,  $^2J_{\text{H-H}} = 15.2$  Hz,  $^3J_{\text{H-H}} = 2.4$  Hz, 1H, H-3'), 4.50 (m, 1H, H-4), 6.00 (m, 1H, H-5), 6.93 (m, 2H, H-11), 7.04 (m, 2H, H-12);  **$^{13}\text{C}\{^1\text{H}\}$ -NMR ( $\text{C}_6\text{D}_6$ , 100 MHz):**  $\delta$  (ppm) = 23.9 (C-8 or C-9), 24.3 (C-8 or C-9), 24.8 (C-7), 44.8 (C-3), 50.6 (C-6), 89.7 (C-2), 98.5 (C-4), 111.1 (C-13), 118.8 (C-14), 125.8 (C-11), 132.0 (C-12), 144.4 (C-5), 152.2 (C-10); **MS (ESI):**  $\text{C}_{15}\text{H}_{17}\text{NO}$ , 226.1  $[\text{M-H}]^+$ . **IR spectrum (neat)** ( $\text{cm}^{-1}$ ) = 2954, 2910, 2229, 1624, 1608, 1502, 1466, 1387, 1279, 1155, 1123, 1056, 967, 844, 704, 631;  $[\alpha]_{\text{D}}^{23} = +37.1$  (c 0.85,  $\text{CH}_2\text{Cl}_2$ ); **HPLC:** OJ-H, 229 nm, Hexane:*i*PrOH, 98:2, 1 mL/min, 30 °C,  $t_{\text{R}1} = 6.5$  and  $t_{\text{R}2} = 6.9$  min.

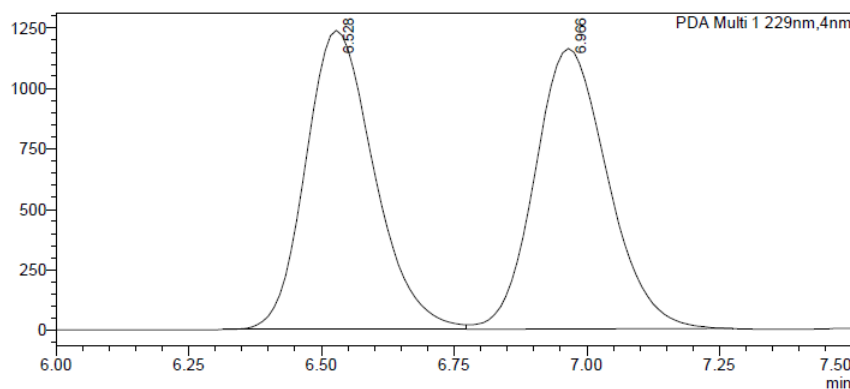

#### <Peak Table>

| PDA Ch1 229nm |           |         |
|---------------|-----------|---------|
| Peak#         | Ret. Time | Area%   |
| 1             | 6.528     | 50.004  |
| 2             | 6.966     | 49.996  |
| Total         |           | 100.000 |

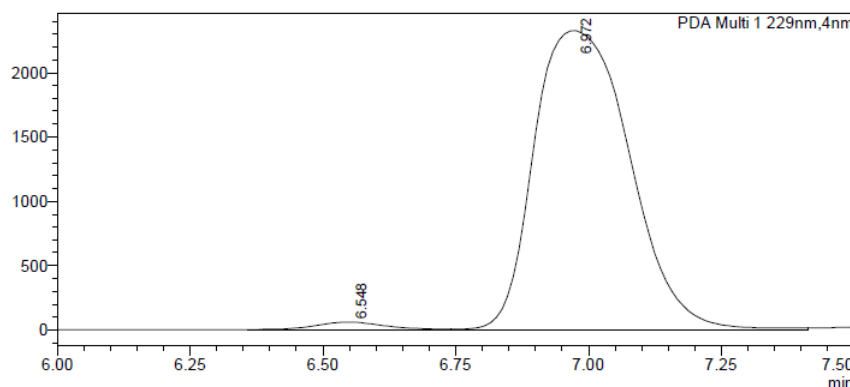

#### <Peak Table>

| PDA Ch1 229nm |           |         |
|---------------|-----------|---------|
| Peak#         | Ret. Time | Area%   |
| 1             | 6.548     | 1.682   |
| 2             | 6.972     | 98.318  |
| Total         |           | 100.000 |

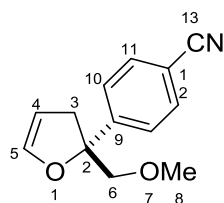

### (*R*)-2-(4-cyanophenyl)-2-(methoxymethyl)-2,3-dihydrofuran (**4dc**)

Prepared according to **GP2** using 5-(methoxymethyl)-2,3-dihydrofuran (**1d**). Isolated by column chromatography (Cyclohexane:AcOEt 10:1) as a colorless oil (63% yield, 96% *ee*) with  $R_f = 0.45$  (Cyclohexane:AcOEt 2:1);  $^1\text{H-NMR}$  ( $\text{C}_6\text{D}_6$ , 400 MHz):  $\delta$  (ppm) = 2.29 (dt,  $^2J_{\text{H-H}} = 15.2$  Hz,  $^3J_{\text{H-H}} = 2.4$  Hz, H-3), 2.81 (dt,  $^2J_{\text{H-H}} = 15.3$  Hz,  $^3J_{\text{H-H}} = 2.4$  Hz, 1H, H-3'), 2.98 (s, 3H, H-8), 3.21 (d,  $^2J_{\text{H-H}} = 9.9$  Hz, 1H, H-6), 3.25 (d,  $^2J_{\text{H-H}} = 10.0$  Hz, 1H, H-6'), 4.56-4.58 (m, 1H, H-4), 6.10-6.12 (m, 1H, H-5), 7.06-7.08 (m, 2H, H-11), 7.11-7.13 (m, 2H, H-10);  $^{13}\text{C}\{^1\text{H}\}$ -NMR ( $\text{C}_6\text{D}_6$ , 100 MHz):  $\delta$  (ppm) = 39.4 (C-3), 59.2 (C-8), 77.9 (C-6), 88.7 (C-2), 99.1 (C-4), 111.7 (C-12), 118.9 (C-13), 126.4 (C-10), 131.9 (C-11), 144.6 (C-5), 149.8 (C-9); **GC-MS (EI)**: ( $\text{C}_{13}\text{H}_{13}\text{NO}_2$ ), 215.1 (3,  $\text{M}^+$ ), 170.1 (100), 152.0 (14), 142.1 (31), 116.0 (28), 102.0 (12), 89.0 (17); **IR spectrum (neat)** ( $\text{cm}^{-1}$ ) = 2926, 2228, 1623, 1149, 1108, 1056, 841, 702, 557;  $[\alpha]_{\text{D}}^{23} = +38.5$  (c 0.88,  $\text{CH}_2\text{Cl}_2$ ); **HPLC**: AD-H, 204 nm, Hexane:*i*-PrOH, 98:2, 1 mL/min, 30 °C,  $t_{\text{R}1} = 9.4$  and  $t_{\text{R}2} = 11.3$  min.

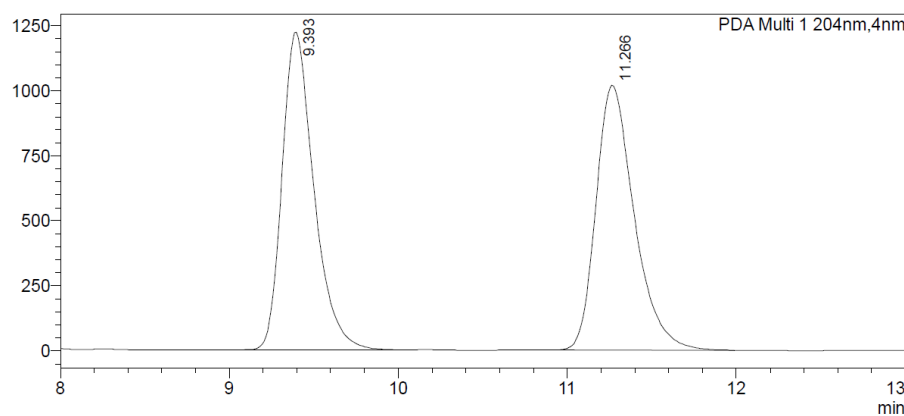

#### <Peak Table>

| PDA Ch1 204nm |           |         |
|---------------|-----------|---------|
| Peak#         | Ret. Time | Area%   |
| 1             | 9.393     | 49.891  |
| 2             | 11.266    | 50.109  |
| Total         |           | 100.000 |

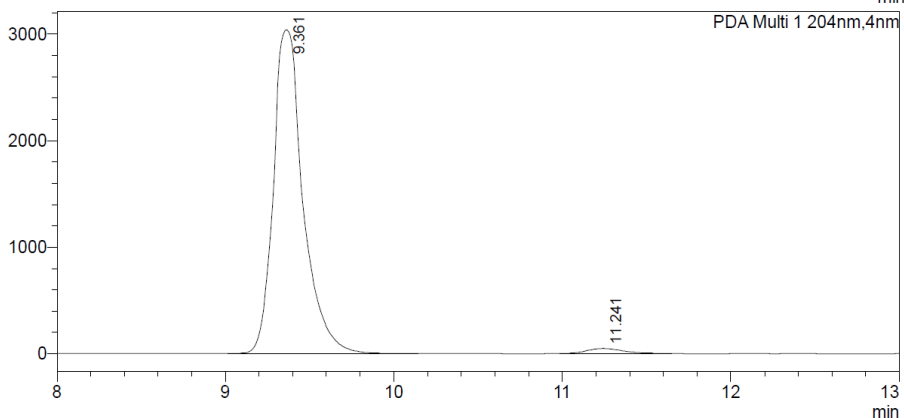

#### <Peak Table>

| PDA Ch1 204nm |           |         |
|---------------|-----------|---------|
| Peak#         | Ret. Time | Area%   |
| 1             | 9.361     | 98.102  |
| 2             | 11.241    | 1.898   |
| Total         |           | 100.000 |

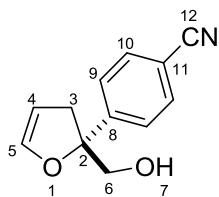

**(R)-2-(4-cyanophenyl)-2-hydroxymethyl-2,3-dihydrofuran (4ec)**

Prepared according to **GP2** using 5-(methanolyl)-2,3-dihydrofuran (**1e**). Isolated by column chromatography (Cyclohexane:AcOEt 4:1) as a pale yellow oil (37% yield, 92% *ee*) with  $R_f = 0.14$  (Cyclohexane:AcOEt 4:1).  $^1\text{H-NMR}$  ( $\text{C}_6\text{D}_6$ , 400 MHz):  $\delta$  (ppm) = 1.36 (m, 1H, H-7), 2.17 (dt,  $^2J_{\text{H-H}} = 15.2$  Hz,  $^3J_{\text{H-H}} = 2.4$  Hz, 1H, H-3), 2.65 (dt,  $^2J_{\text{H-H}} = 15.2$  Hz,  $^3J_{\text{H-H}} = 2.4$  Hz, 1H, H-3'), 3.32 (m, 2H, H-6), 4.51 (m, 2H, H-4), 6.00 (m, 2H, H-5), 6.90 (m, 2H, H-9), 7.00 (m, 2H, H-10);  $^{13}\text{C}\{^1\text{H}\}$ -NMR( $\text{C}_6\text{D}_6$ , 100 MHz):  $\delta$  (ppm) = 38.7 (C-3), 68.4 (C-6), 89.7 (C-2), 99.7 (C-4), 111.8 (C-11), 118.7 (C-12), 126.0 (C-9), 132.0 (C-10), 144.2 (C-5), 149.0 (C-8); **MS (ESI)**:  $\text{C}_{12}\text{H}_{11}\text{NO}_2$ , 202.1  $[\text{M}+\text{H}]^+$ ; **IR spectrum (neat)** ( $\text{cm}^{-1}$ ) = 3428, 2976, 2864, 2229, 1625, 1609, 1503, 1448, 1383, 1286, 1150, 1113, 1052, 968, 908, 841, 708, 628, 558;  $[\alpha]_D^{23} = +9.7$  (c 0.90,  $\text{CH}_2\text{Cl}_2$ ); **HPLC**: OD-H, 228 nm, Hexane:*i*PrOH, 95:5, 1 mL/min, 30 °C,  $t_{\text{R}1} = 22.8$  and  $t_{\text{R}2} = 24.8$  min.

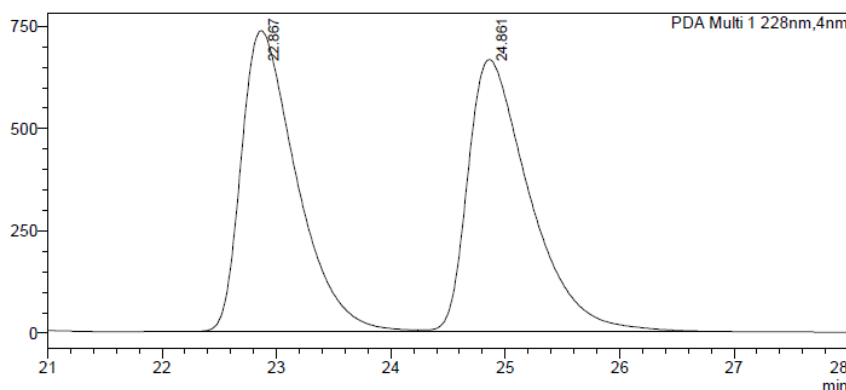

**<Peak Table>**

| PDA Ch1 228nm |           |         |
|---------------|-----------|---------|
| Peak#         | Ret. Time | Area%   |
| 1             | 22.867    | 49.781  |
| 2             | 24.861    | 50.219  |
| Total         |           | 100.000 |

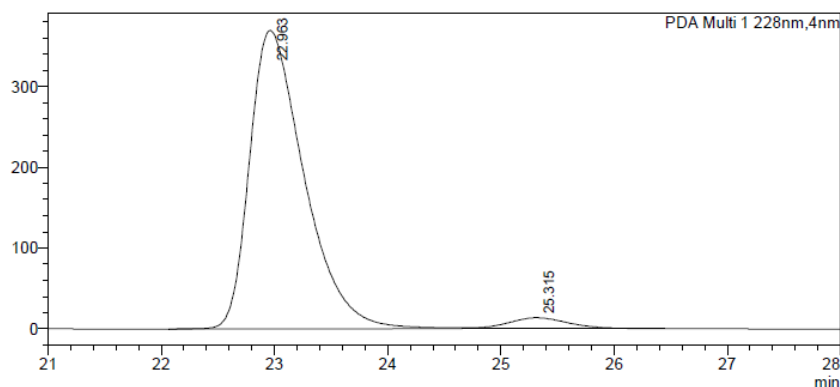

**<Peak Table>**

| PDA Ch1 228nm |           |         |
|---------------|-----------|---------|
| Peak#         | Ret. Time | Area%   |
| 1             | 22.963    | 96.072  |
| 2             | 25.315    | 3.928   |
| Total         |           | 100.000 |

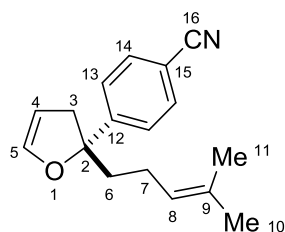

### (*R*)-2-(4-cyanophenyl)-2-(4-methylpent-3-en-1-yl)-2,3-dihydrofuran (**4fc**)

Prepared according to **GP2** using 5-(4-methylpent-3-en-1-yl)-2,3-dihydrofuran (**1f**). Isolated by column chromatography (Cyclohexane:AcOEt 85:1) as a pale yellow oil (58% yield, 98% *ee*) with  $R_f = 0.60$  (Cyclohexane:AcOEt 10:1);  $^1\text{H-NMR}$  ( $\text{C}_6\text{D}_6$ , 400 MHz):  $\delta$  (ppm) = 1.42 (s, 3H, H-10 or H-11), 1.60 (H-10 or H-11), 1.75-1.83 (m, 3H, H-6, H-6' and H-7), 2.1 (m, 1H, H-7'), 2.32 (dt,  $^2J_{\text{H-H}} = 15.2$  Hz,  $^3J_{\text{H-H}} = 2.4$  Hz, 1H, H-3), 2.47 (dt,  $^2J_{\text{H-H}} = 15.2$  Hz,  $^3J_{\text{H-H}} = 2.4$  Hz, 1H, H-3'), 4.5 (m, 1H, H-4), 5.05 (m, 1H, H-14), 6.1 (m, 1H, H-5), 6.97 (m, 2H, H-13), 7.05 (m, 2H, H-14);  $^{13}\text{C}\{^1\text{H}\}$ -NMR ( $\text{C}_6\text{D}_6$ , 100 MHz):  $\delta$  (ppm) = 17.5 (C-10 or C-11), 22.9 (C-7), 25.7 (C-10 or C-11), 42.5 (C-6), 43.2 (C-3), 89.2 (C-2), 98.6 (C-4), 111.2 (C-15), 118.8 (C-16), 124.1 (C-8), 125.7 (C-13), 131.8 (C-9), 132.0 (C-14), 144.5 (C-5), 151.8 (C-12); **MS (ESI)**:  $\text{C}_{17}\text{H}_{19}\text{NO}$ , 254.6  $[\text{M}+\text{H}]^+$ ; **IR spectrum (neat)** ( $\text{cm}^{-1}$ ) = 2921, 2229, 1624, 1609, 1503, 1448, 1407, 1377, 1327, 1147, 1124, 1053, 1016, 965, 930, 882, 842, 775, 706, 560;  $[\alpha]_{\text{D}}^{23} = +57.2$  (c 0.85,  $\text{CH}_2\text{Cl}_2$ ); **HPLC**: OJ-H, 205 nm, Hexane:*i*PrOH, 98:2, 1 mL/min, 30 °C,  $t_{\text{R}1} = 7.4$  and  $t_{\text{R}2} = 8.1$  min.

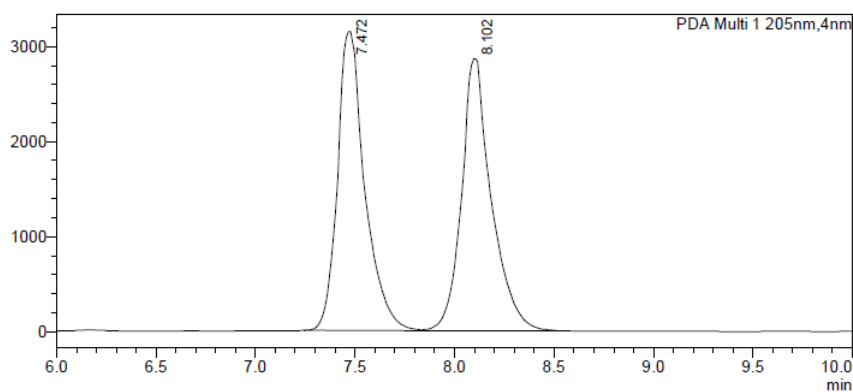

#### <Peak Table>

| PDA Ch1 205nm |           |         |
|---------------|-----------|---------|
| Peak#         | Ret. Time | Area%   |
| 1             | 7.472     | 50.150  |
| 2             | 8.102     | 49.850  |
| Total         |           | 100.000 |

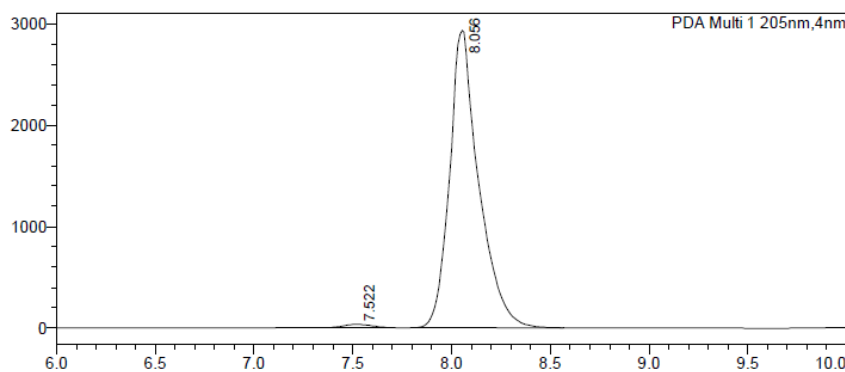

#### <Peak Table>

| PDA Ch1 205nm |           |         |
|---------------|-----------|---------|
| Peak#         | Ret. Time | Area%   |
| 1             | 7.522     | 1.051   |
| 2             | 8.056     | 98.949  |
| Total         |           | 100.000 |

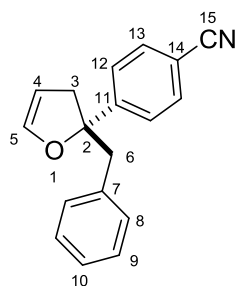

**(R)-2-(4-cyanophenyl)-2-benzyl-2,3-dihydrofuran (4gc)**

Prepared according to **GP2** using 5-benzyl-2,3-dihydrofuran (**1g**). Isolated by column chromatography (Cyclohexane:AcOEt 80:1) as a pale yellow oil (64% yield, 98% *ee*) with  $R_f = 0.45$  (Cyclohexane:AcOEt 10:1);  **$^1\text{H-NMR}$  ( $\text{C}_6\text{D}_6$ , 400 MHz):**  $\delta$  (ppm) = 2.35 (dt,  $^2J_{\text{H-H}} = 15.1$  Hz,  $^3J_{\text{H-H}} = 2.4$  Hz, 1H, H-3), 2.55 (dt,  $^2J_{\text{H-H}} = 15.1$  Hz,  $^3J_{\text{H-H}} = 2.4$  Hz, 1H, H-3'), 2.71 (d,  $^2J_{\text{H-H}} = 13.7$  Hz, H-6), 2.92 (d,  $^2J_{\text{H-H}} = 13.7$  Hz, H-6'), 4.49 (m, 1H, H-4), 6.05 (m, 1H, H-5), 6.80 (m, 2H, H-12), 6.83 (m, 2H, H-8), 6.95 (m, 2H, H-13), 7.02 (m, 3H, H-9 and H-10);  **$^{13}\text{C}\{^1\text{H}\}$ -NMR ( $\text{C}_6\text{D}_6$ , 100 MHz):**  $\delta$  (ppm) = 42.1 (C-3), 48.0 (C-6), 89.5 (C-2), 99.0 (C-4), 111.3 (C-14), 118.8 (C-15), 126.2 (C-12), 126.9 (C-10), 128.0 (C-9), 130.8 (C-8), 131.7 (C-13), 136.1 (C-7), 144.2 (C-5), 151.1 (C-11); **MS (ESI):**  $\text{C}_{18}\text{H}_{15}\text{NO}$ , 262.0 [M+H]<sup>+</sup>; **IR spectrum (neat)** ( $\text{cm}^{-1}$ ) = 2919, 2228, 1624, 1607, 1497, 1453, 1403, 1333, 1281, 1146, 1055, 994, 970, 843, 753, 698, 628;  $[\alpha]_{\text{D}}^{23} = -41.5$  (c 0.86,  $\text{CH}_2\text{Cl}_2$ ); **HPLC:** OJ-H, 205 nm, Hexane:*i*PrOH, 98:2, 1 mL/min, 30 °C,  $t_{\text{R}1} = 25.7$  and  $t_{\text{R}2} = 28.2$  min.

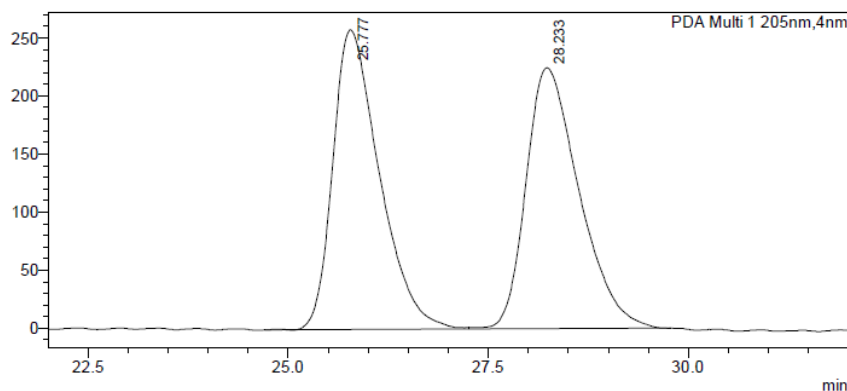

**<Peak Table>**

| PDA Ch1 205nm |           |         |
|---------------|-----------|---------|
| Peak#         | Ret. Time | Area%   |
| 1             | 25.777    | 50.241  |
| 2             | 28.233    | 49.759  |
| Total         |           | 100.000 |

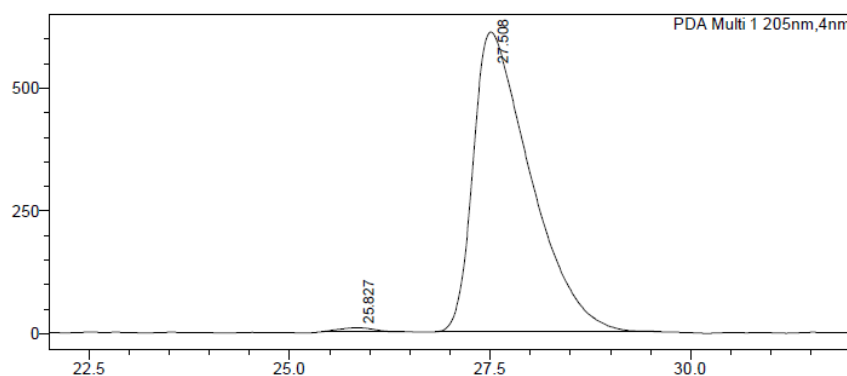

**<Peak Table>**

| PDA Ch1 205nm |           |         |
|---------------|-----------|---------|
| Peak#         | Ret. Time | Area%   |
| 1             | 25.827    | 0.798   |
| 2             | 27.508    | 99.202  |
| Total         |           | 100.000 |

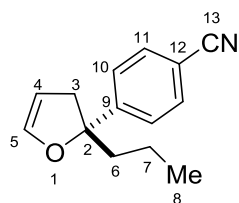

### (R)-2-(4-cyanophenyl)-2-propyl-2,3-dihydrofuran

Prepared according to **GP3** using 5-propyl-2,3-dihydrofuran (**xxx**). Isolated by column chromatography (Cyclohexane:AcOEt 80:1) as a colorless oil (66% yield, 96% *ee*) with  $R_F = 0.5$  (Cyclohexane:AcOEt 10:1);  $^1\text{H-NMR}$  ( $\text{C}_6\text{D}_6$ , 400 MHz):  $\delta$  (ppm) = 0.72 (t,  $^3J_{\text{H-H}} = 7.3$  Hz, 3H, H-8), 0.89-0.99 (m, 1H, H-7), 1.25-1.32 (m, 1H, H-7'), 1.46 (ddd,  $^2J_{\text{H-H}} = 13.6$  Hz,  $^3J_{\text{H-H}} = 11.7$  Hz,  $^3J_{\text{H-H}} = 4.5$  Hz, 1H, H-6), 1.65 (ddd,  $^2J_{\text{H-H}} = 13.7$  Hz,  $^3J_{\text{H-H}} = 11.6$  Hz,  $^3J_{\text{H-H}} = 4.6$  Hz, 1H, H-6'), 2.31 (dt,  $^2J_{\text{H-H}} = 15.2$  Hz,  $^3J_{\text{H-H}} = 2.4$  Hz, 1H, H-3), 2.42 (dt,  $^2J_{\text{H-H}} = 15.2$  Hz,  $^3J_{\text{H-H}} = 2.4$  Hz, 1H, H-3'), 4.51-4.53 (m, 1H, H-4), 6.09-6.11 (m, 1H, H-5), 6.93-6.96 (m, 2H, H-10), 7.04-7.07 (m, 2H, H-11);  $^{13}\text{C}\{^1\text{H}\}$ -NMR ( $\text{C}_6\text{D}_6$ , 100 MHz):  $\delta$  (ppm) = 14.3 (C-8), 17.4 (C-7), 43.2 (C-3), 44.7 (C-6), 89.4 (C-2), 98.5 (C-4), 111.3 (C-12), 118.9 (C-13), 125.8 (C-10), 132.0 (C-11), 144.5 (C-5), 152.06 (C-9); **GC-MS (EI)**: ( $\text{C}_{14}\text{H}_{15}\text{NO}$ ), 213.1 (11,  $\text{M}^+$ ), 170.1 (100), 154.0 (23), 142.1 (40), 127.1 (13), 116.0 (33), 102.0 (10); **IR spectrum (neat)** ( $\text{cm}^{-1}$ ) = 2958, 2872, 2280, 1624, 1608, 1457, 1155, 1051, 842, 704, 557;  $[\alpha]_D^{23} = +42.4$  (c 0.41,  $\text{CH}_2\text{Cl}_2$ ); **HPLC**: OJ-H, 226 nm, Hexane:*i*-PrOH, 98:2, 1 mL/min, 30°C,  $t_{R1} = 7.4$  and  $t_{R2} = 7.8$  min.

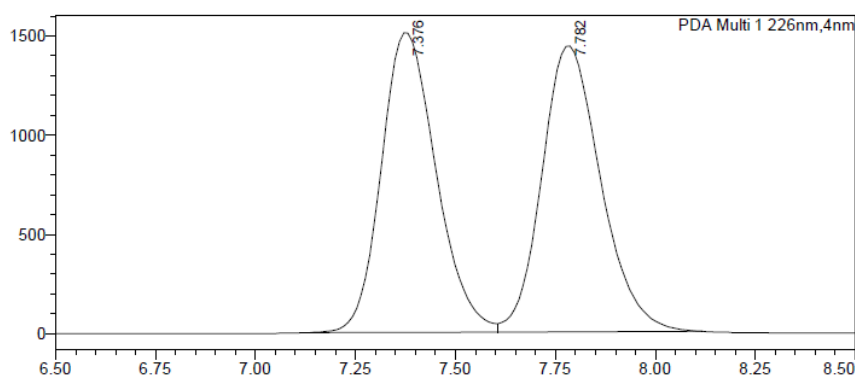

#### <Peak Table>

| PDA Ch1 226nm |           |         |
|---------------|-----------|---------|
| Peak#         | Ret. Time | Area%   |
| 1             | 7.376     | 49.437  |
| 2             | 7.782     | 50.563  |
| Total         |           | 100.000 |

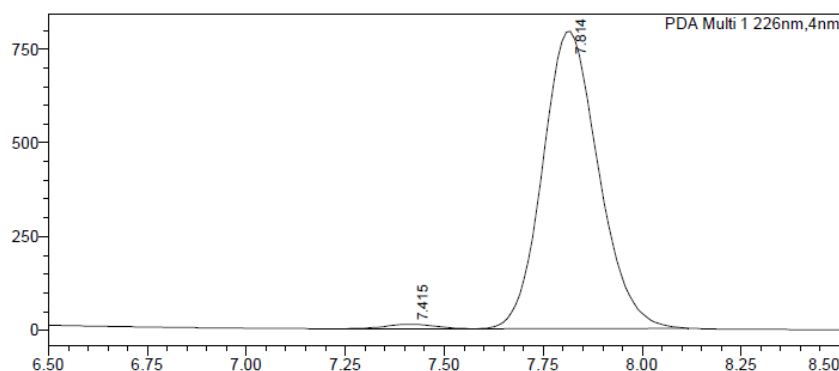

#### <Peak Table>

| PDA Ch1 226nm |           |         |
|---------------|-----------|---------|
| Peak#         | Ret. Time | Area%   |
| 1             | 7.415     | 1.270   |
| 2             | 7.814     | 98.730  |
| Total         |           | 100.000 |

## 5 NMR spectra of all compounds

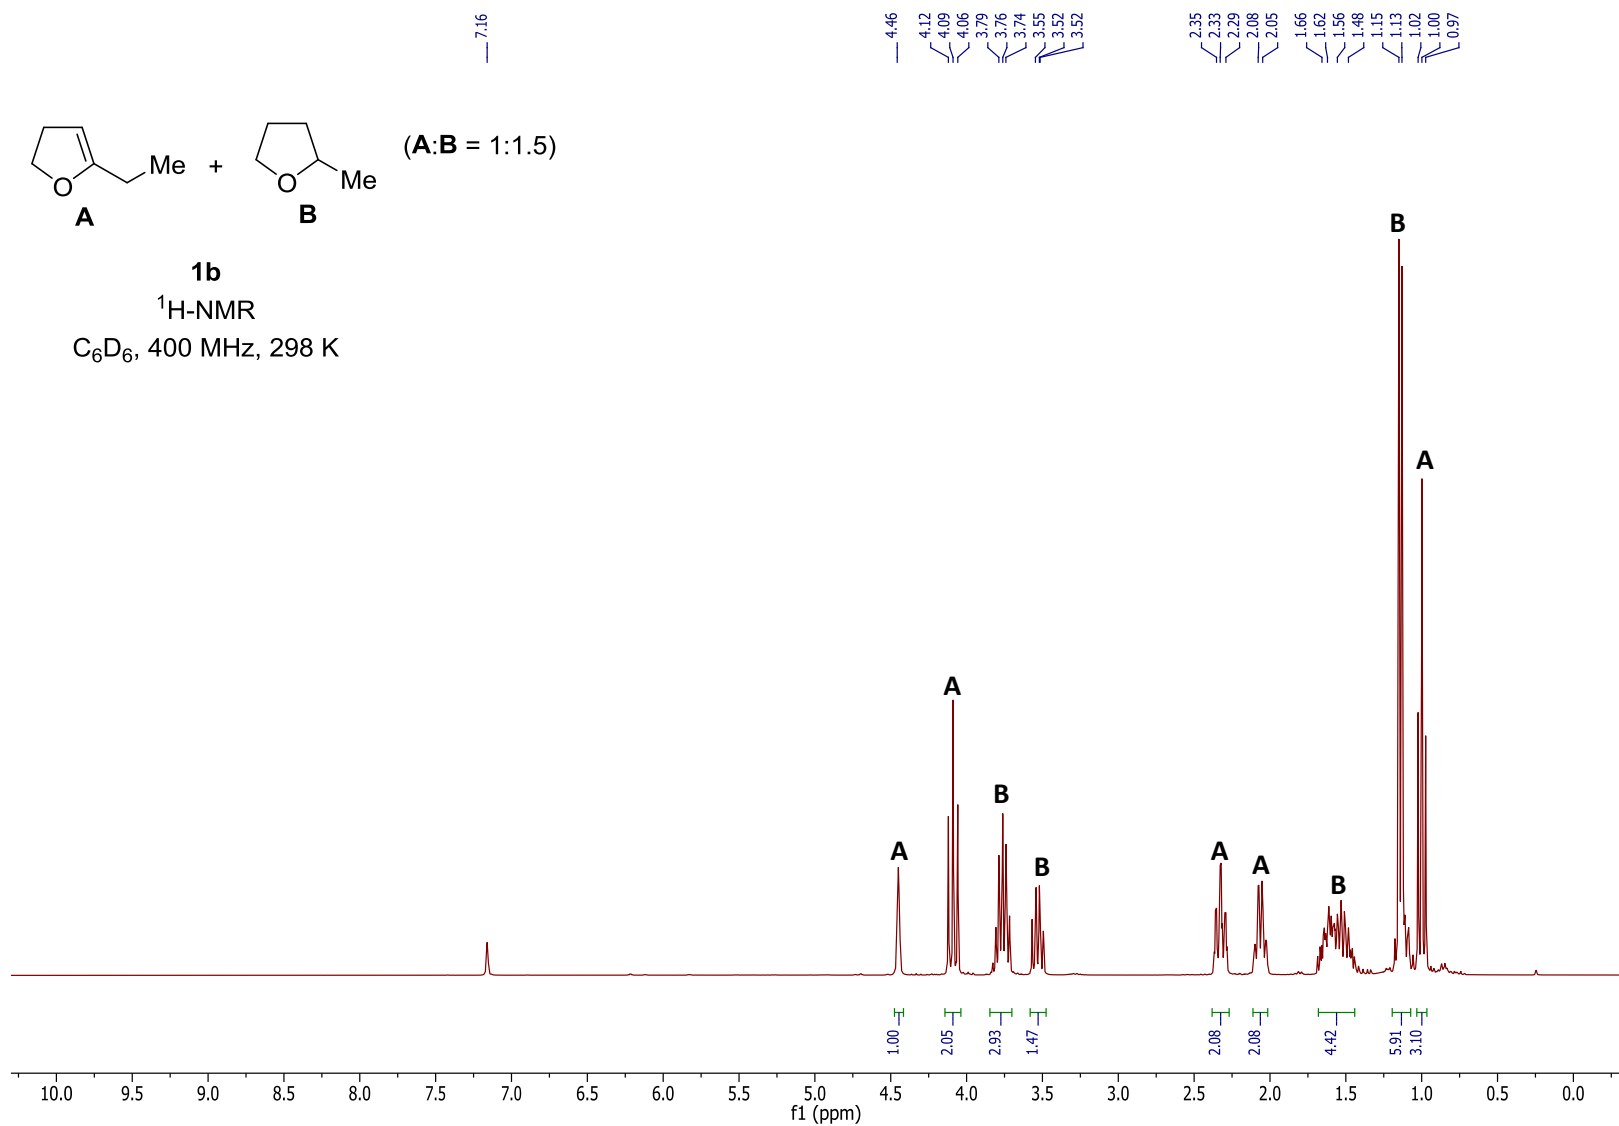

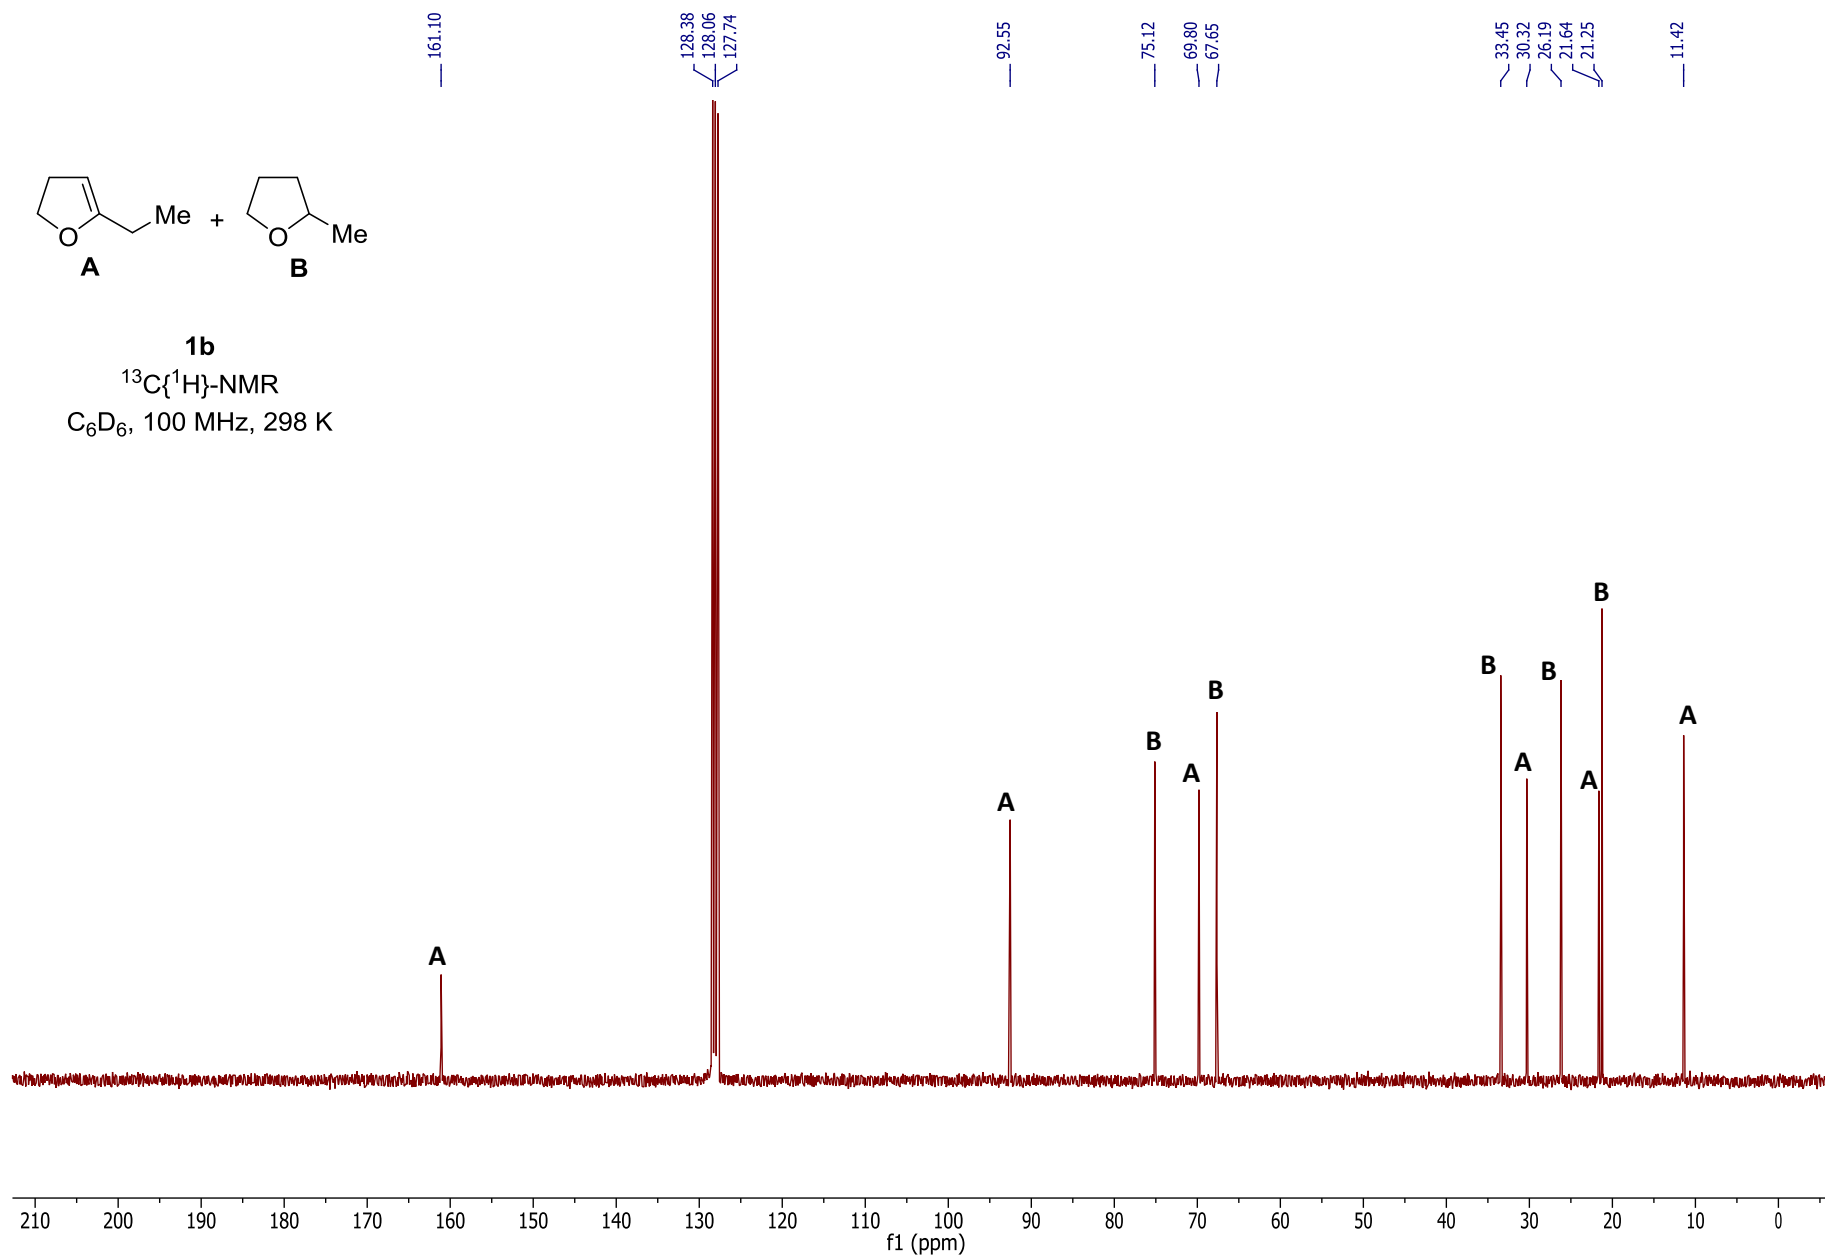



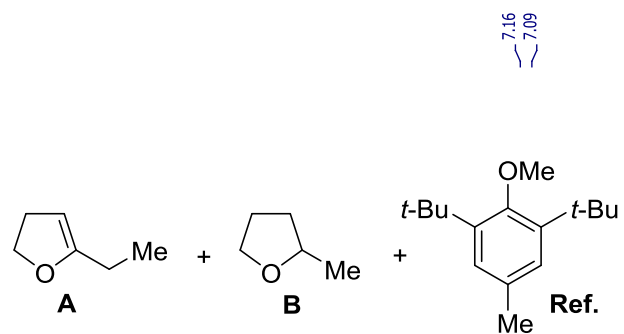

(A:Ref. = 3.7:1)  
[A] = 3.7 M

**1b**  
<sup>1</sup>H-NMR  
C<sub>6</sub>D<sub>6</sub>, 400 MHz, 298 K

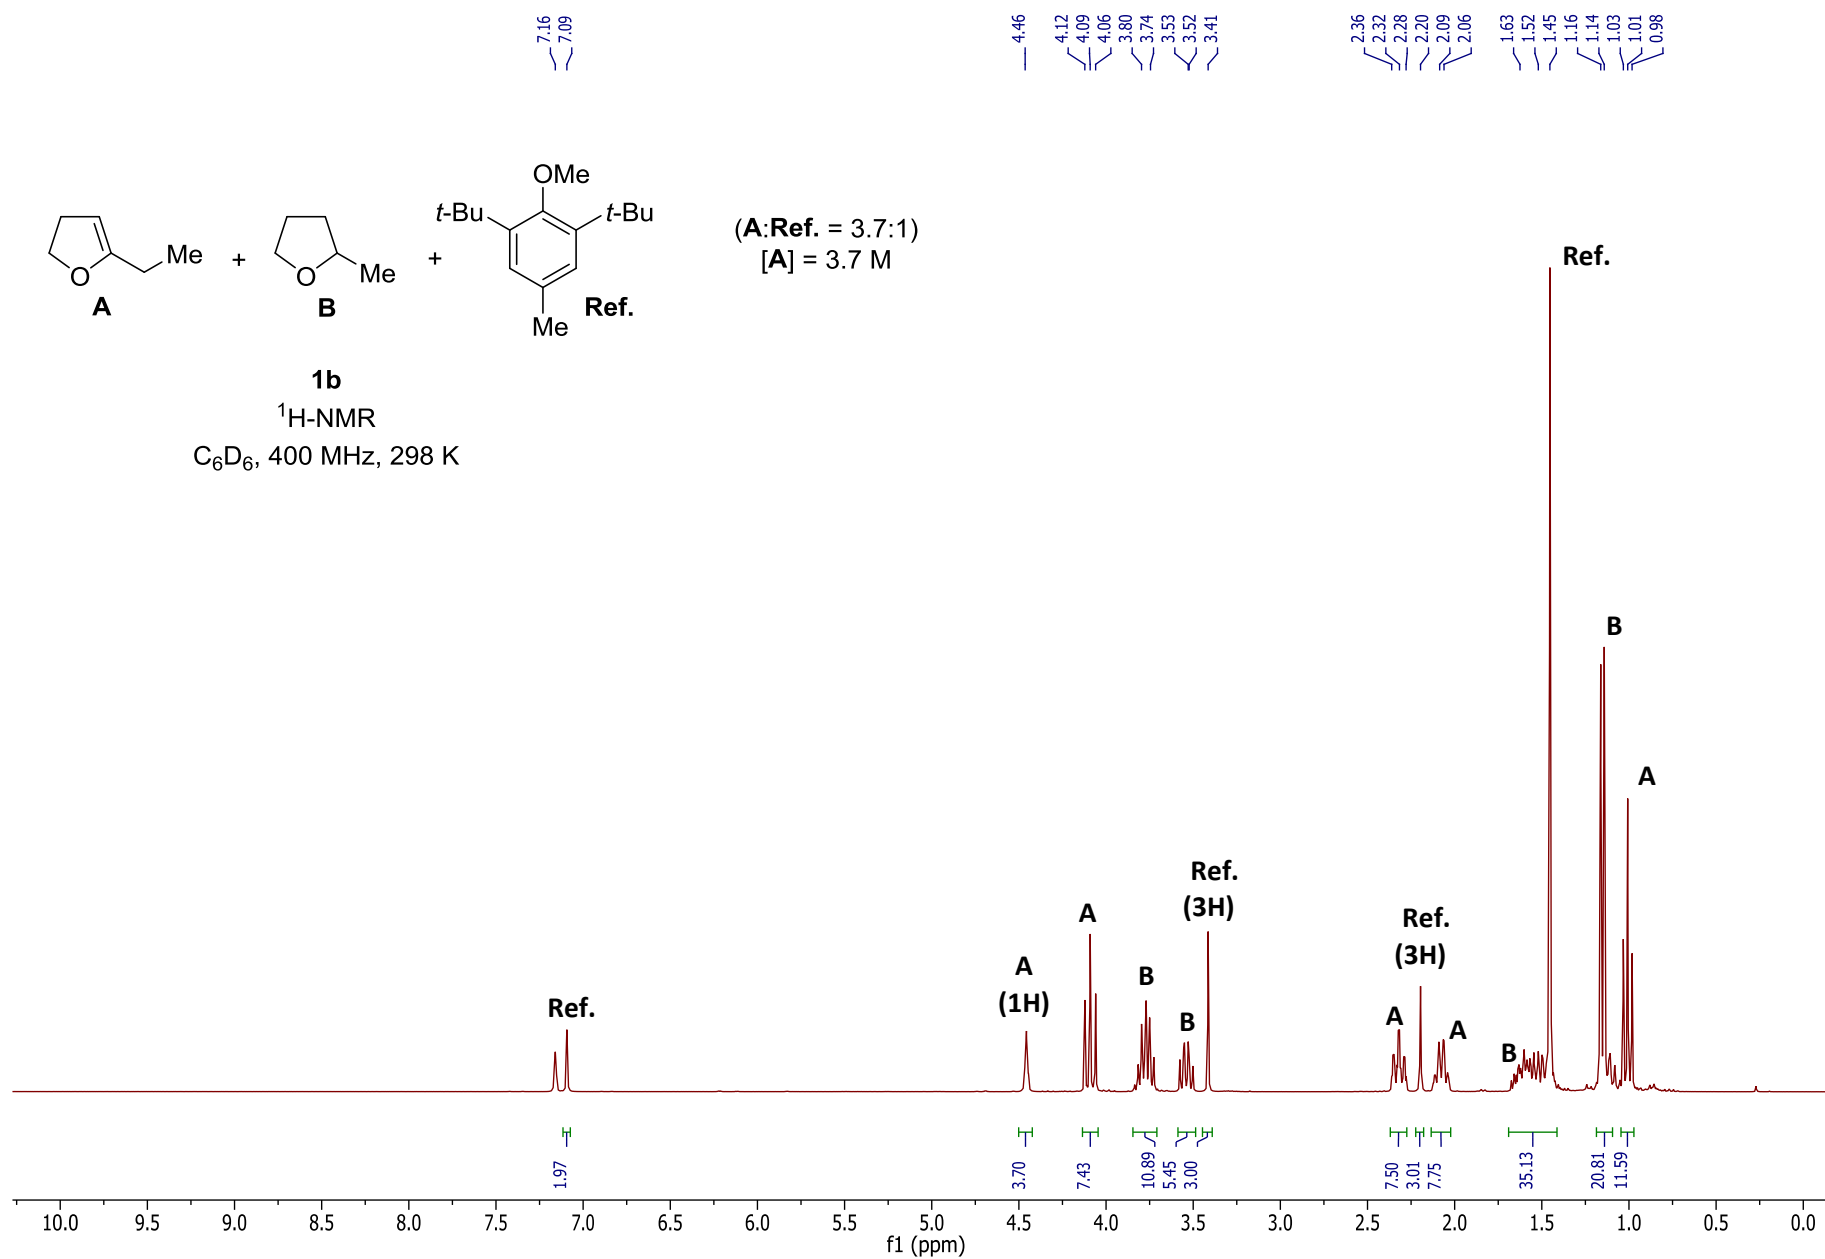

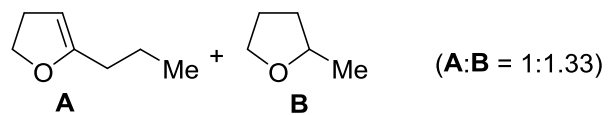

<sup>1</sup>H-NMR  
C<sub>6</sub>D<sub>6</sub>, 400 MHz, 298 K

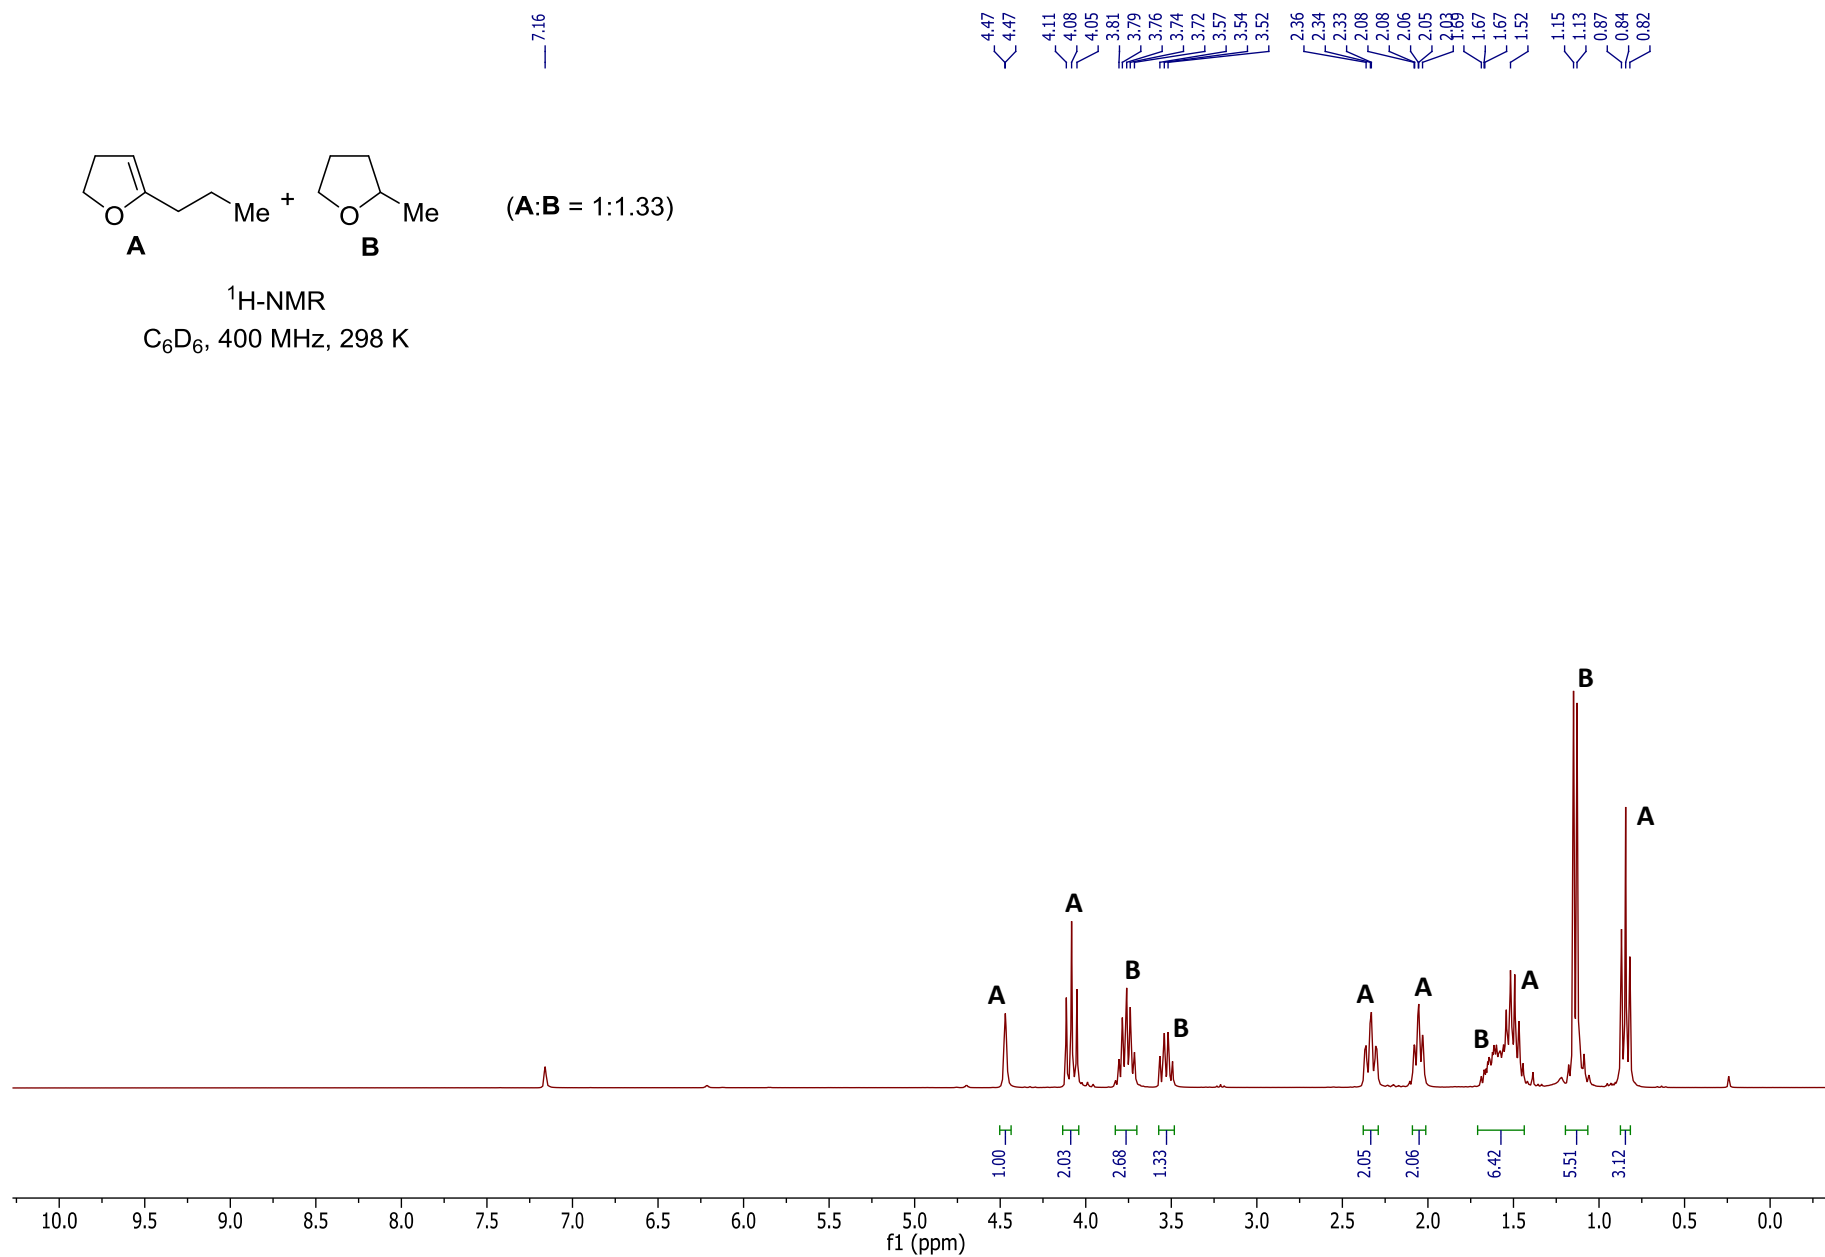

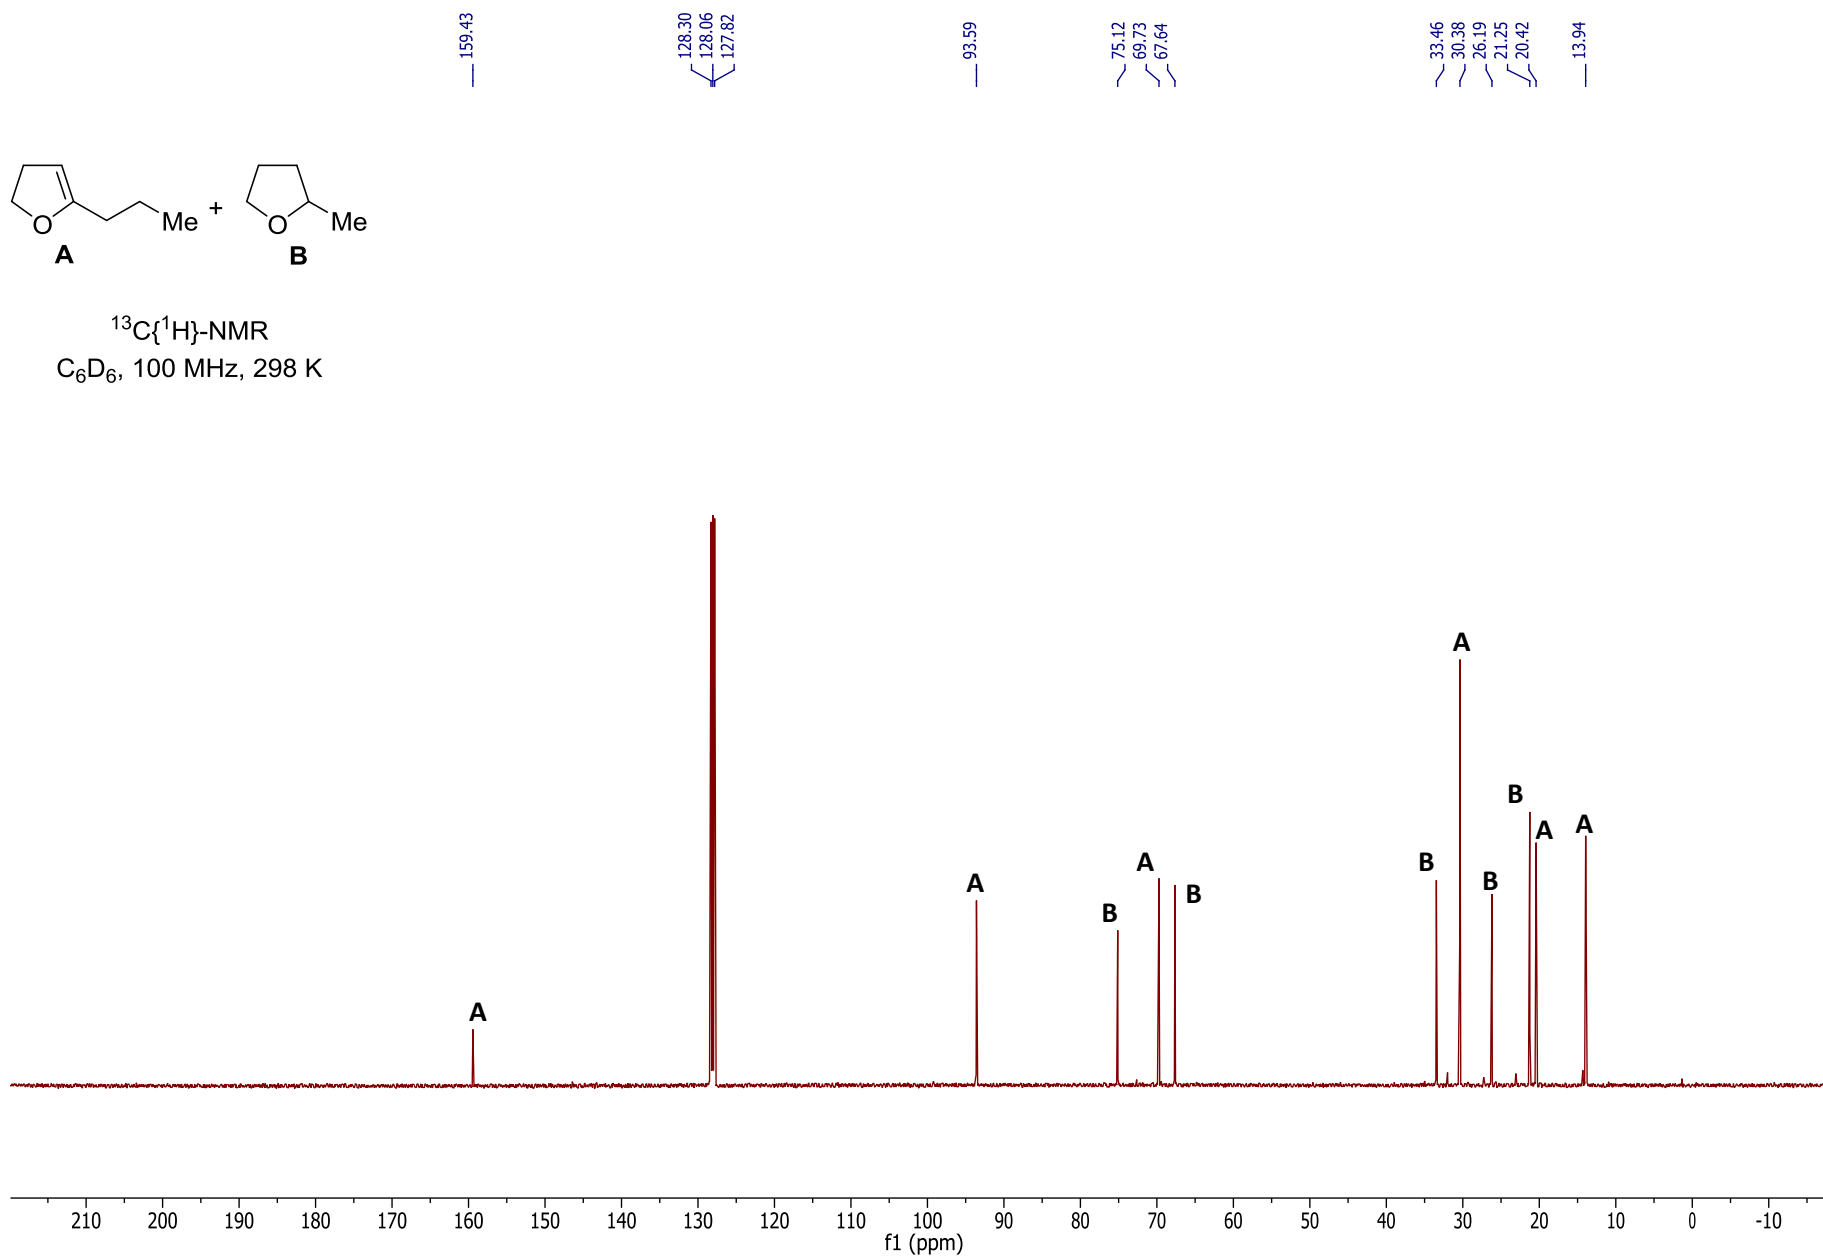

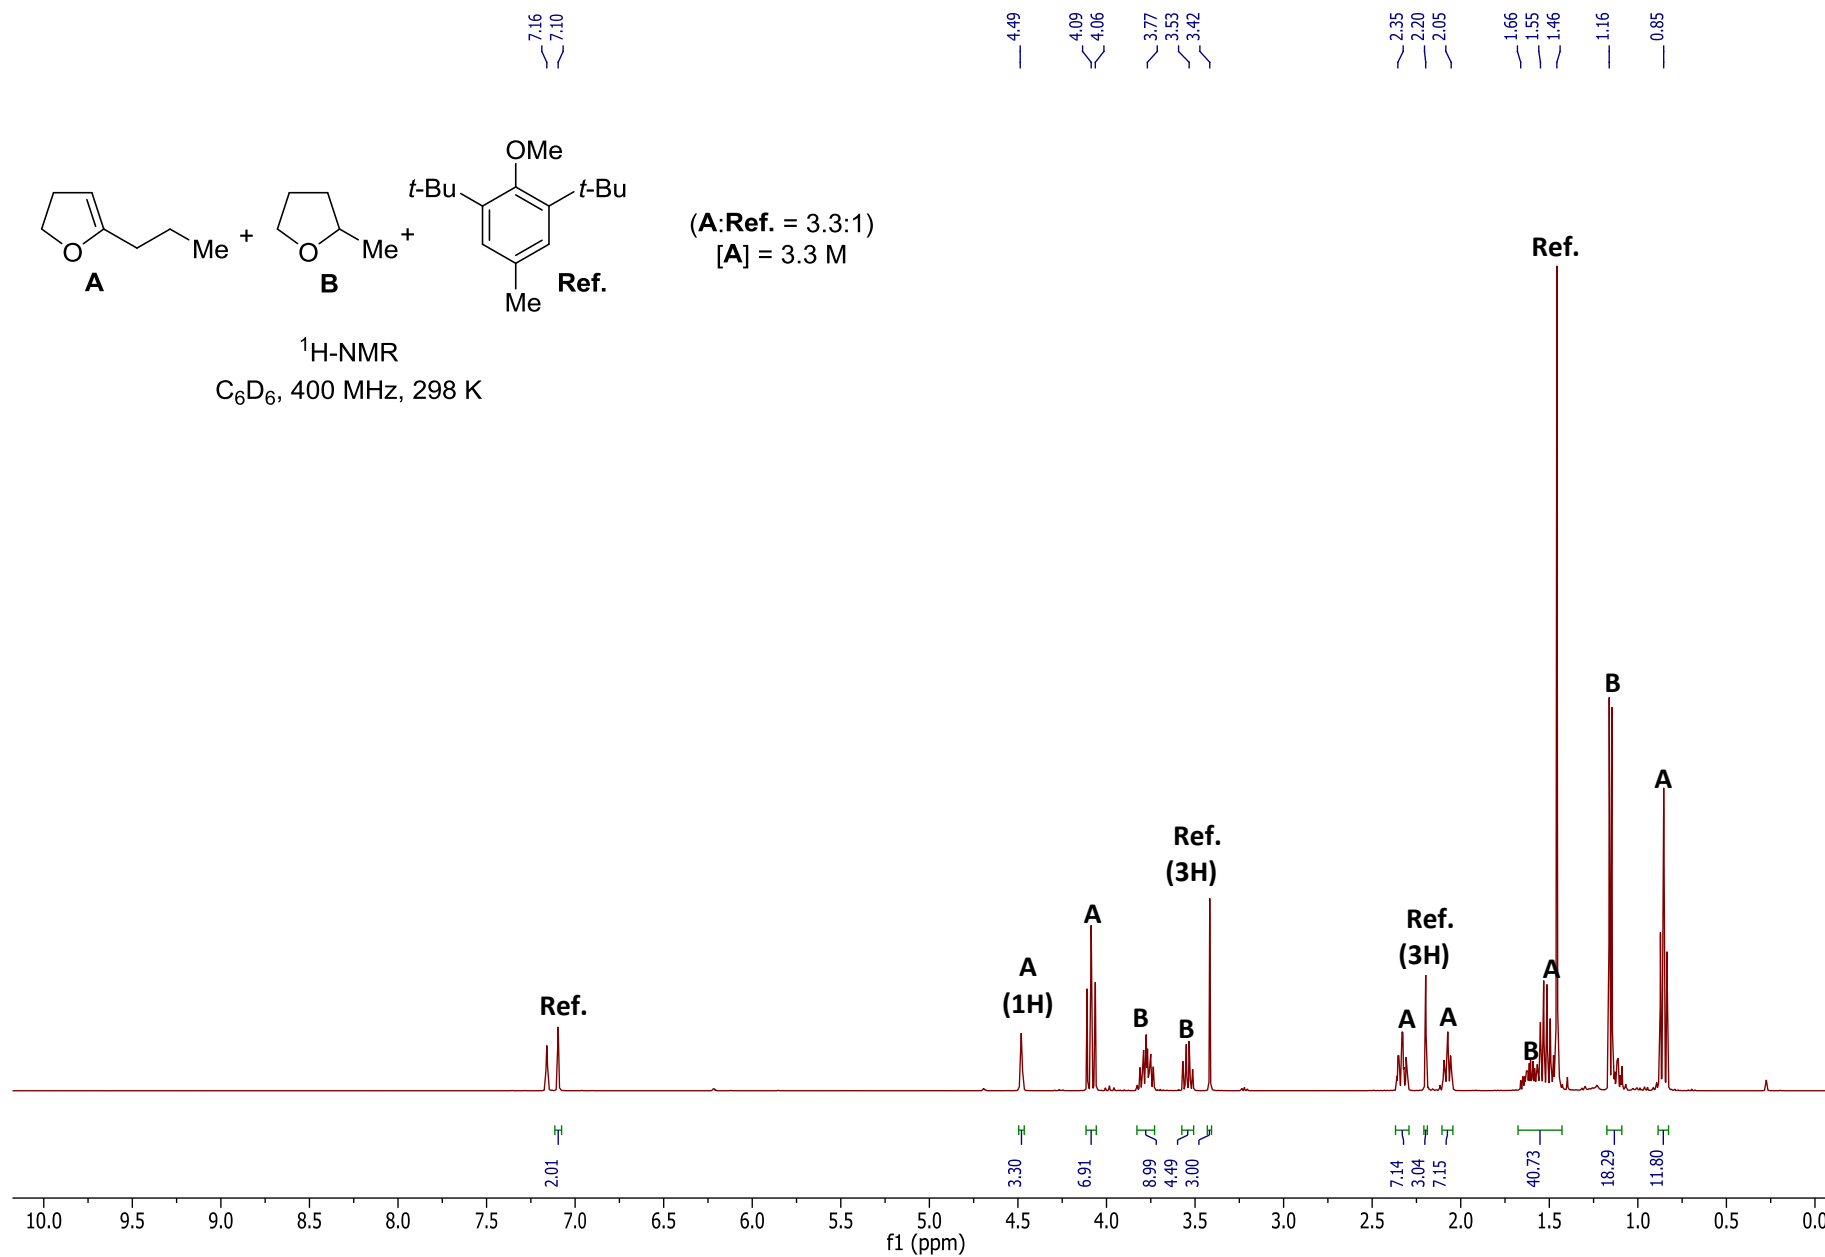

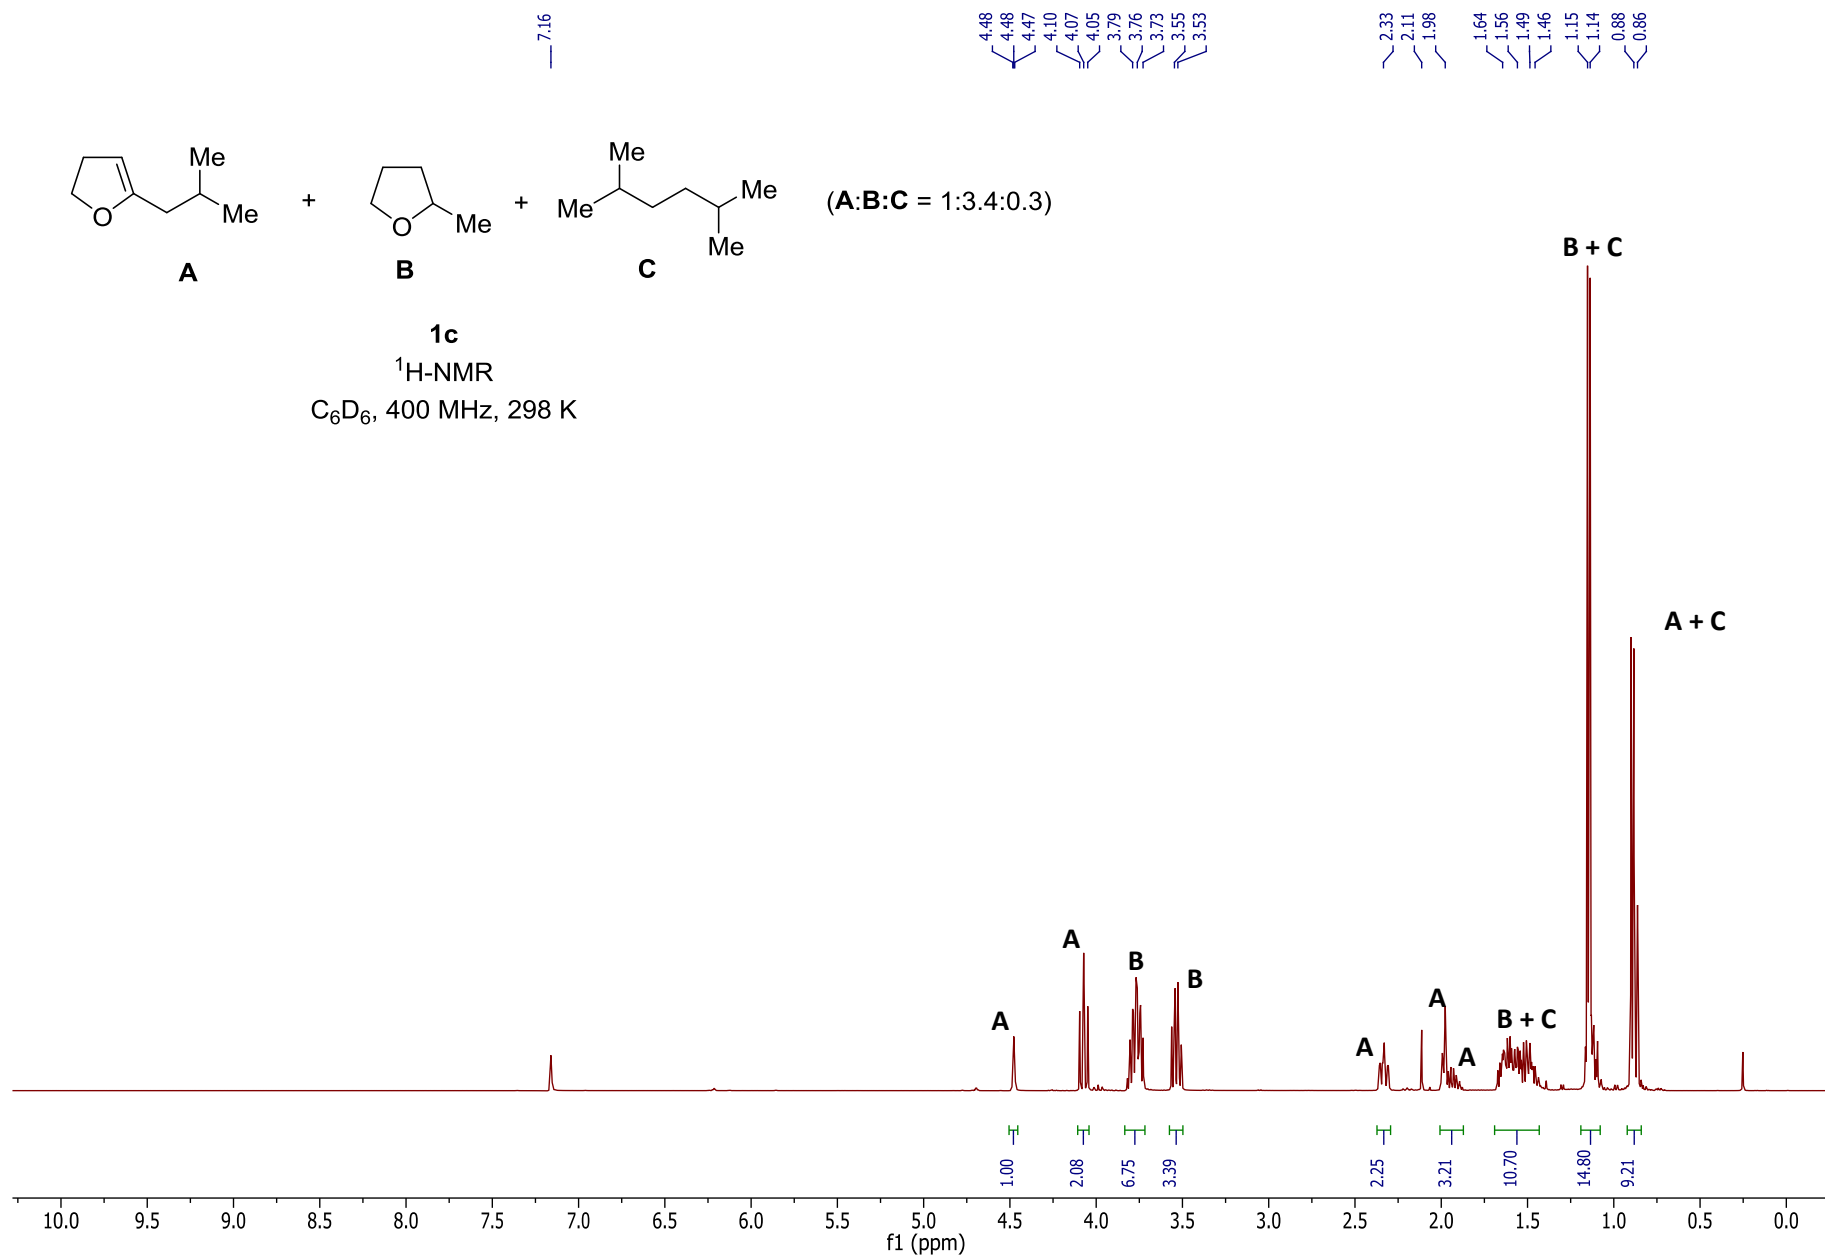

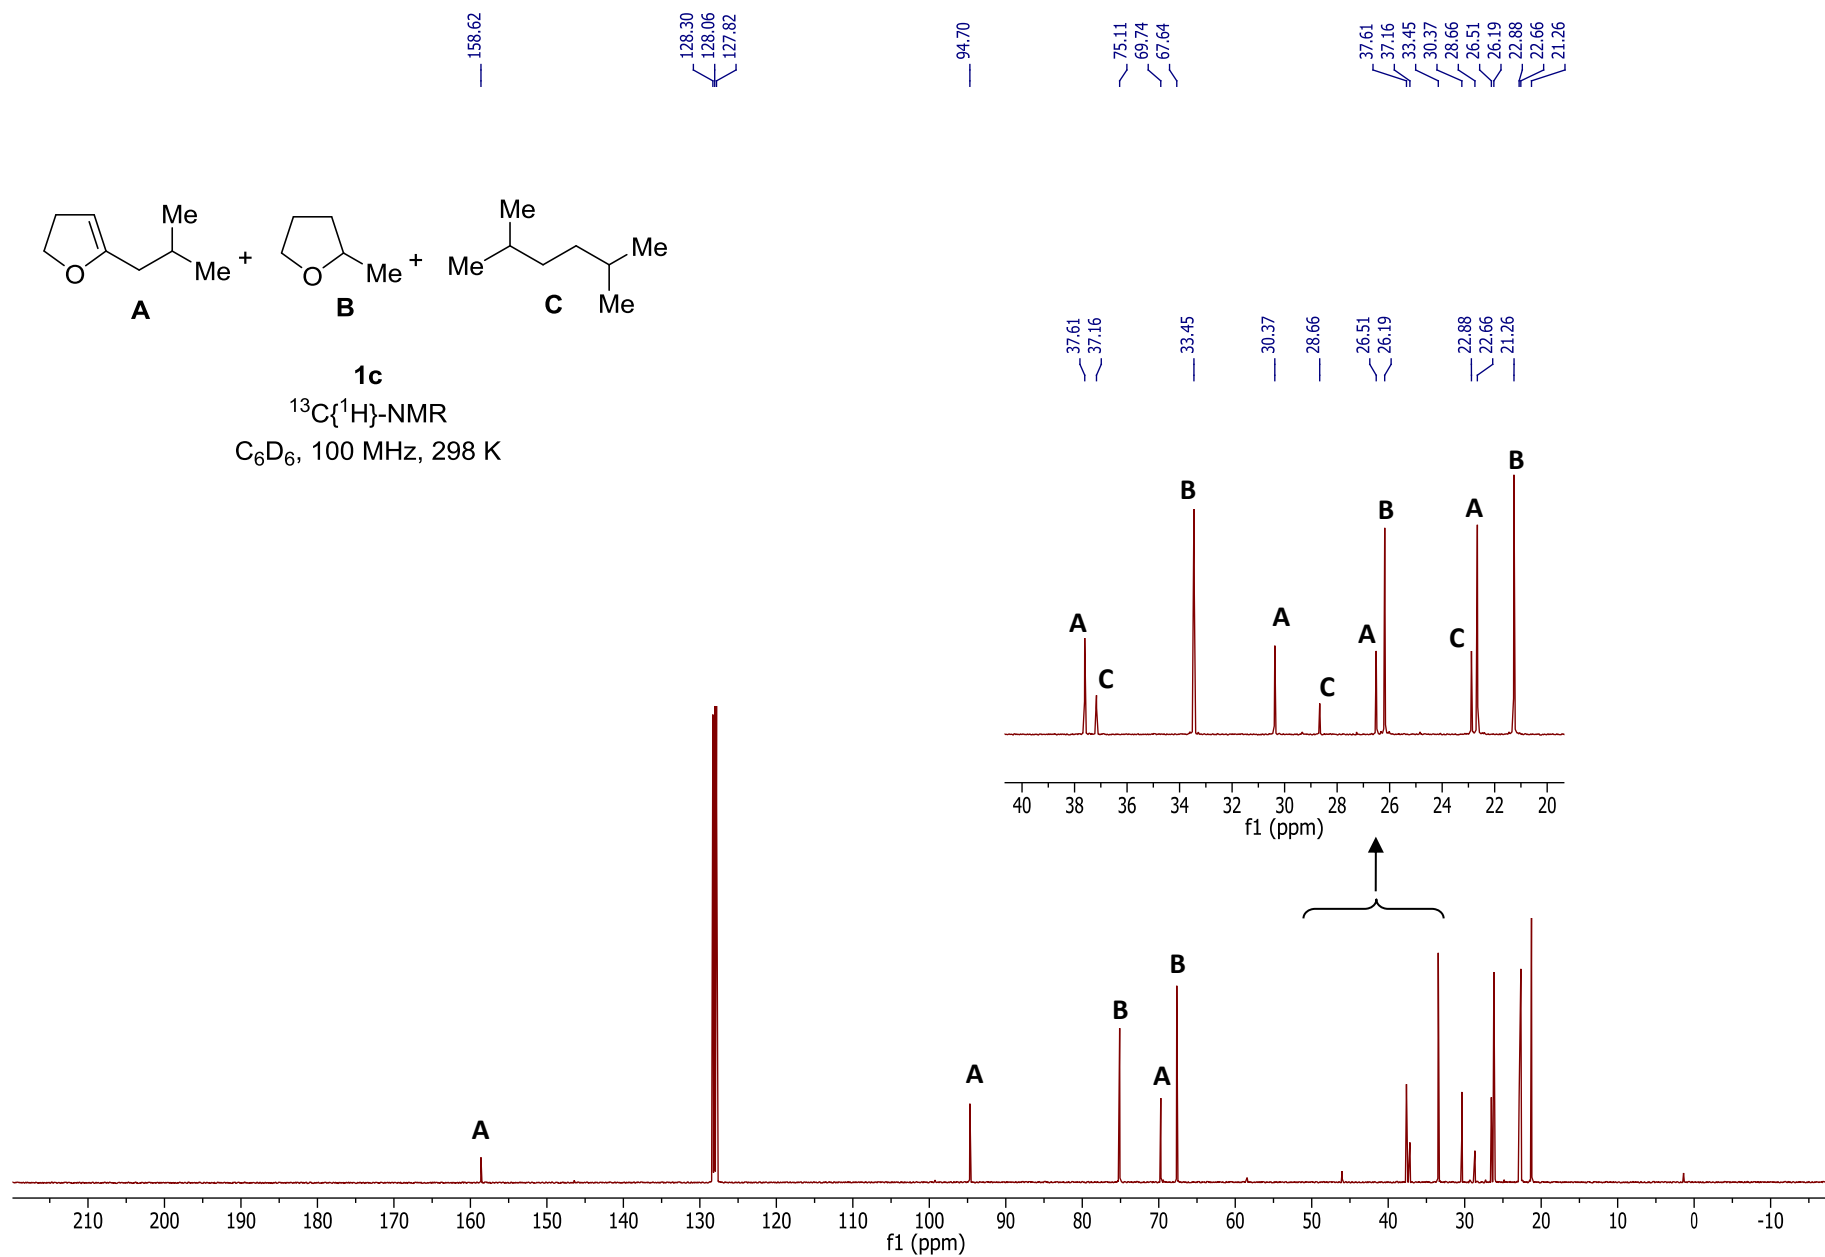

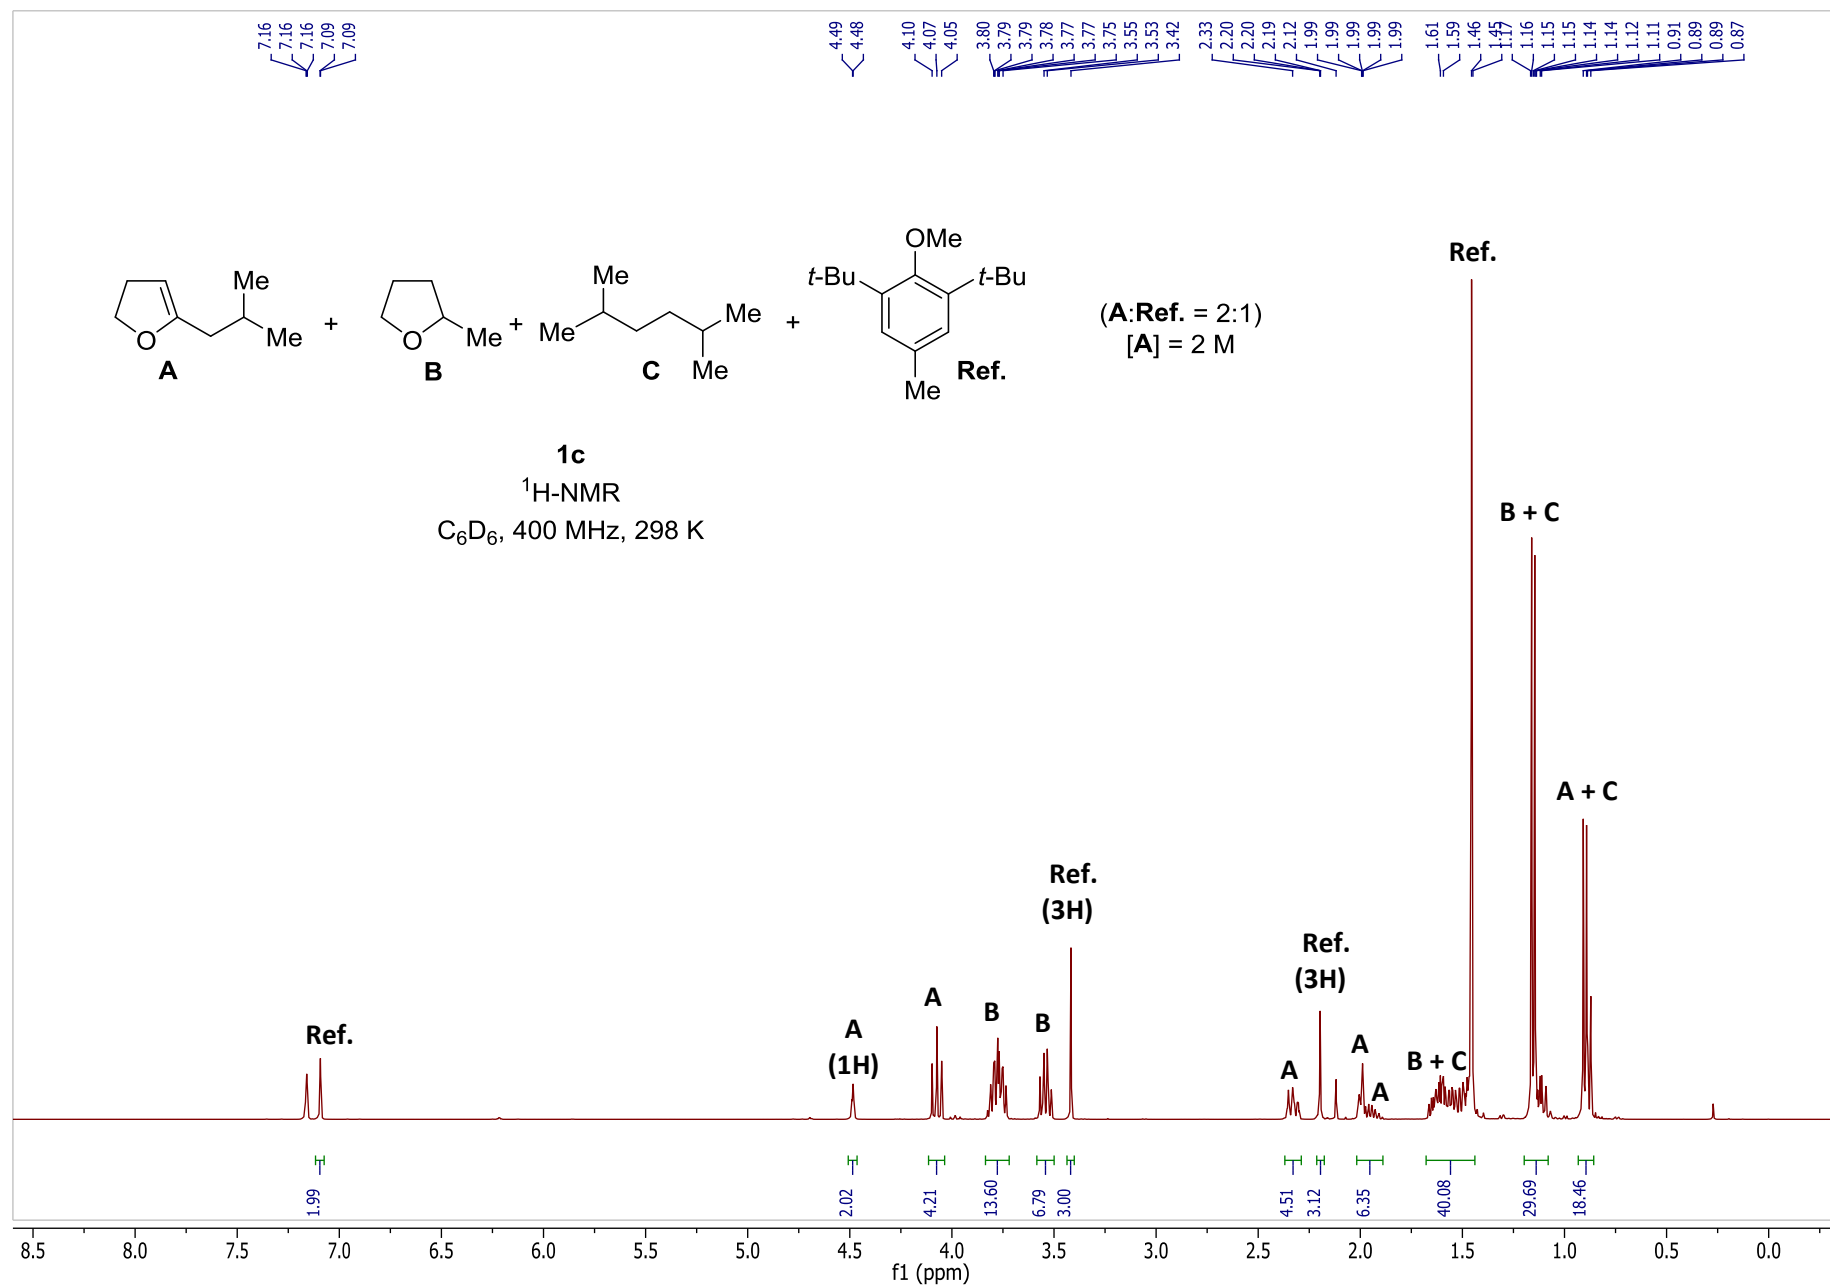

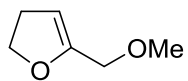**1d**<sup>1</sup>H-NMRC<sub>6</sub>D<sub>6</sub>, 400 MHz, 298 K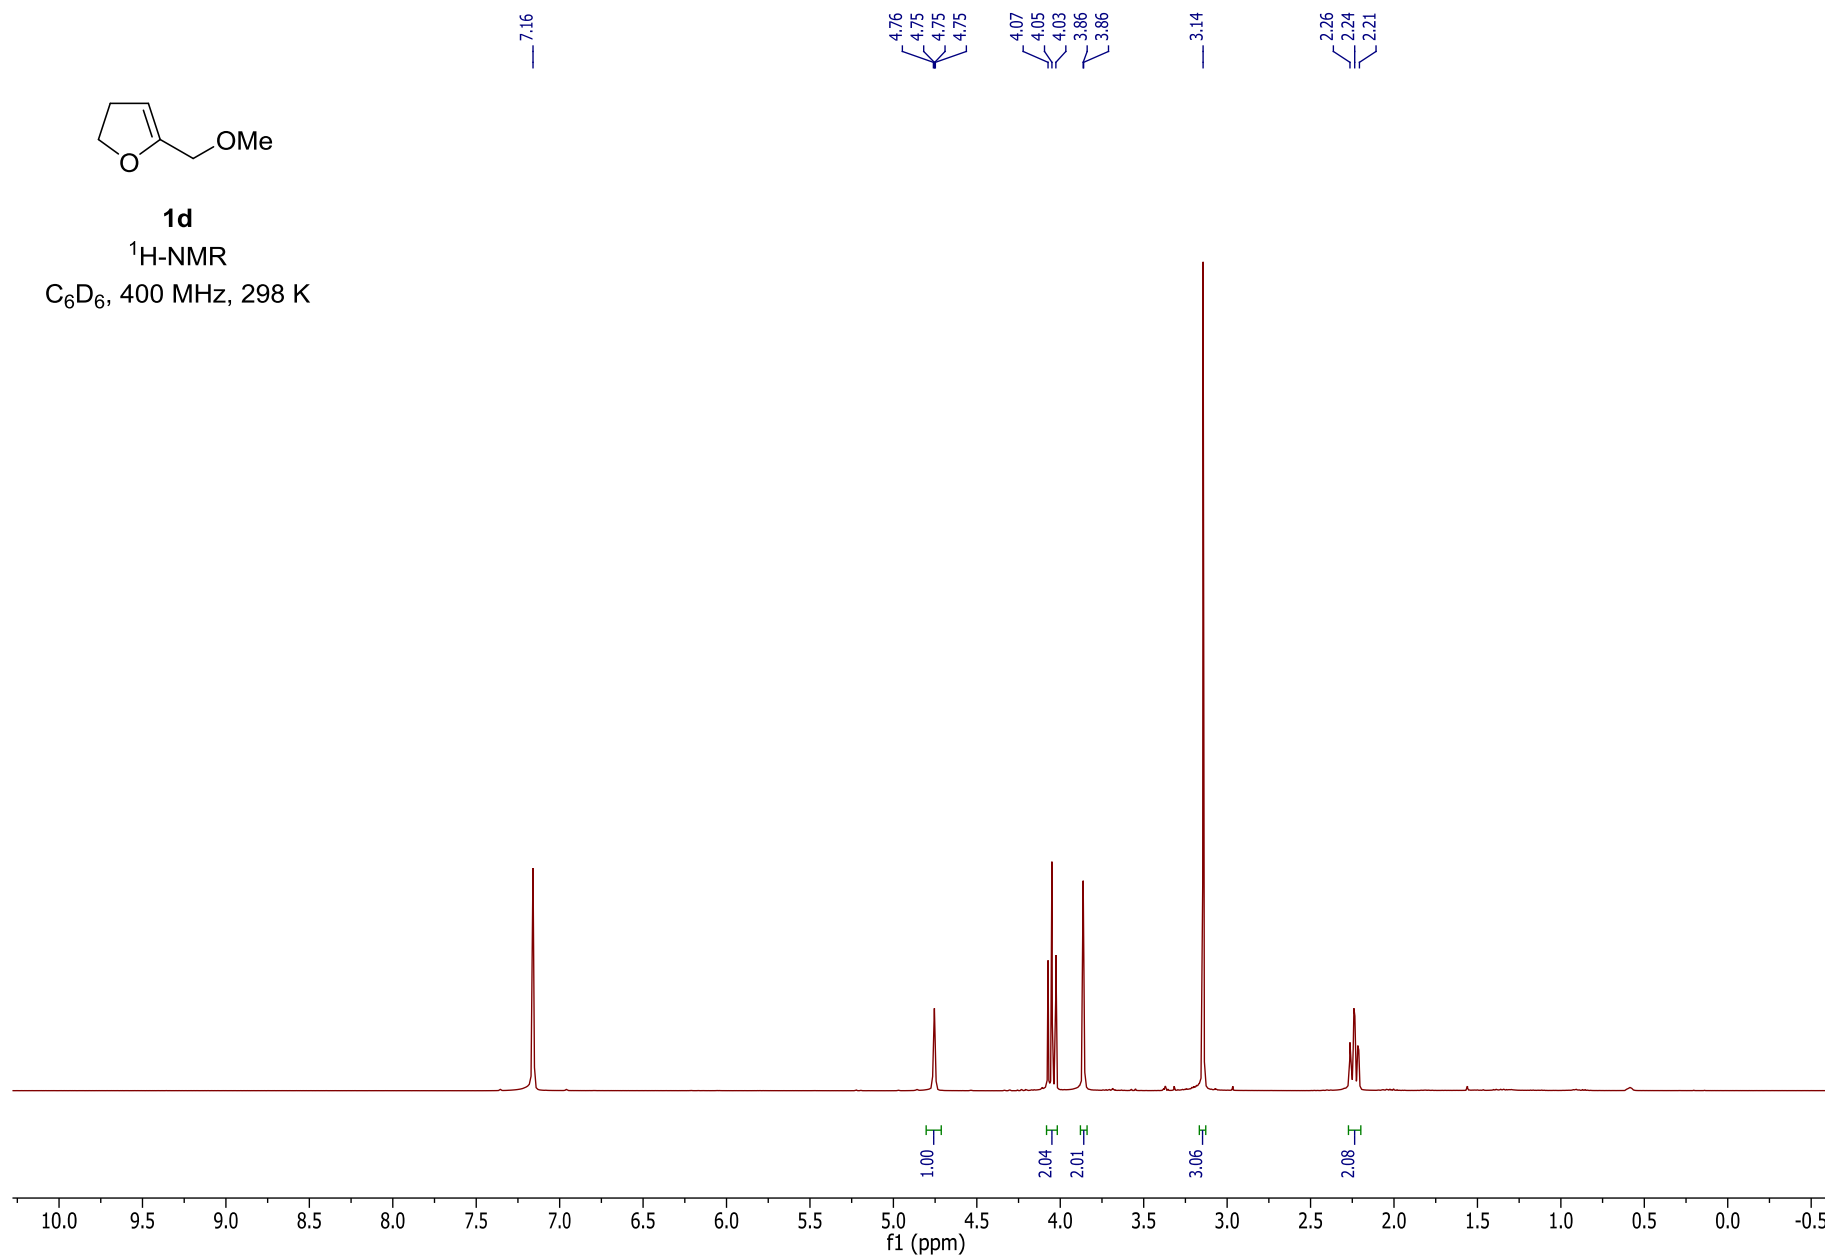



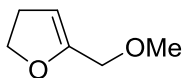**1d**

$^{13}\text{C}\{^1\text{H}\}$ -NMR  
 $\text{C}_6\text{D}_6$ , 100 MHz, 298 K

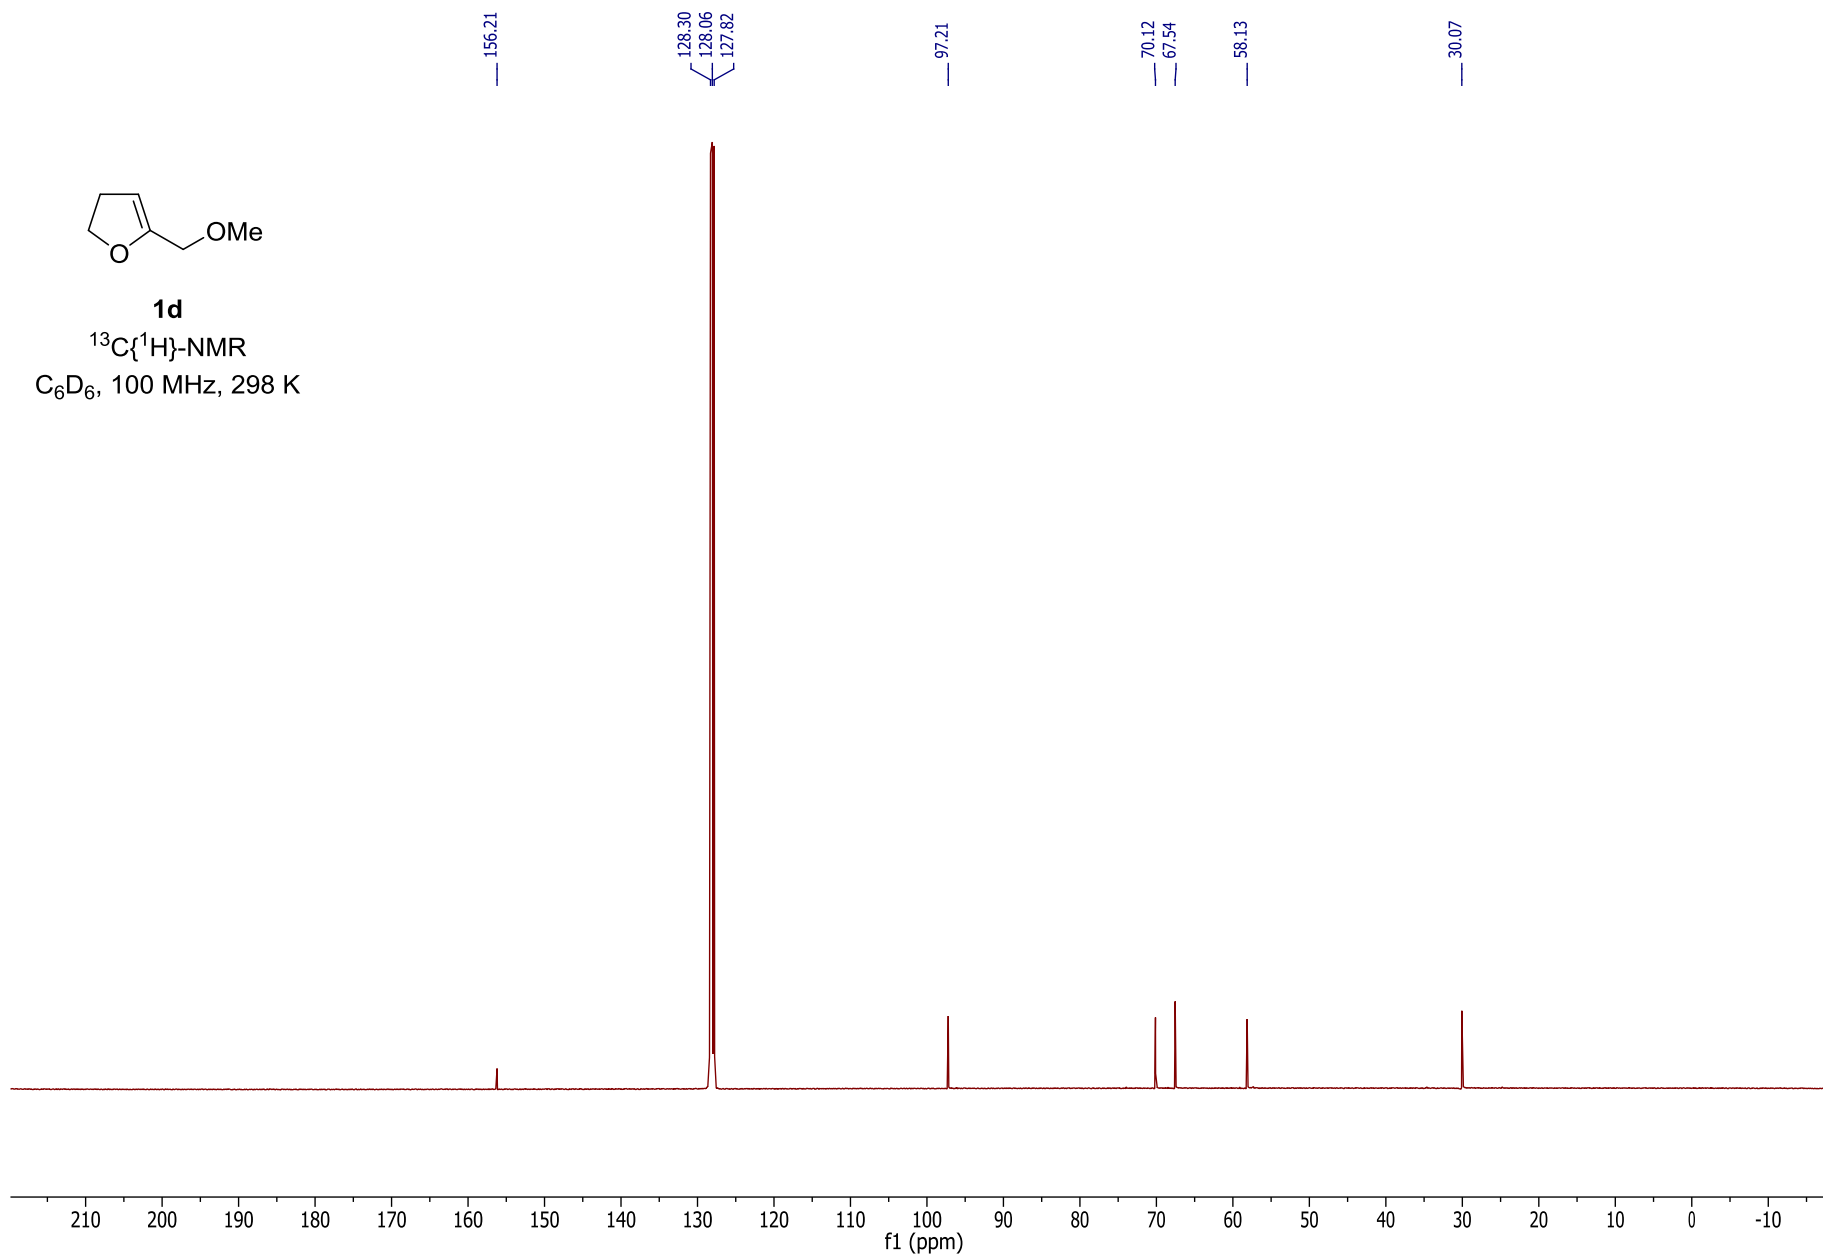

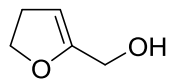**1e**<sup>1</sup>H-NMRC<sub>6</sub>D<sub>6</sub>, 400 MHz, 298 K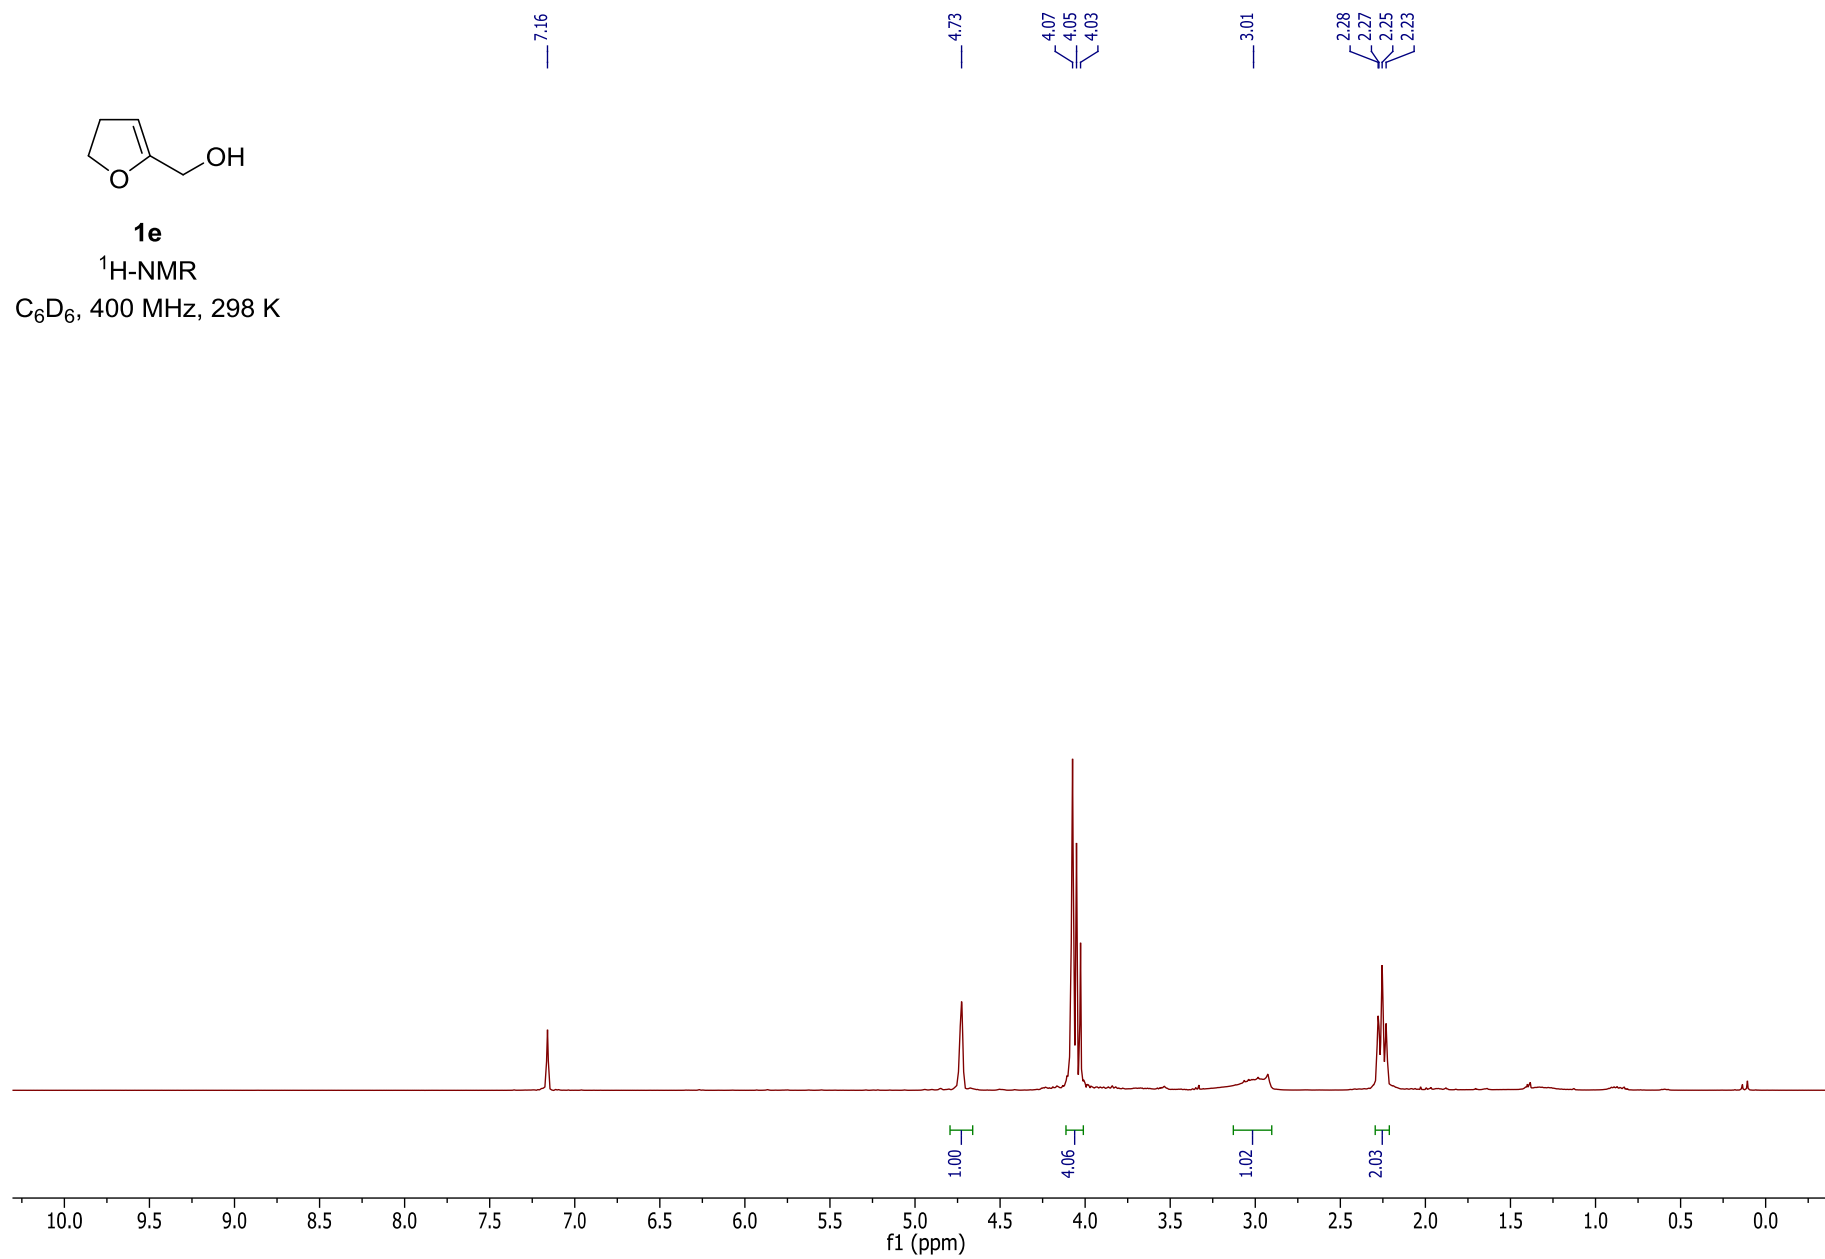

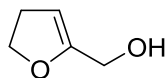**1e** $^{13}\text{C}\{^1\text{H}\}$ -NMR  
 $\text{C}_6\text{D}_6$ , 100 MHz, 298 K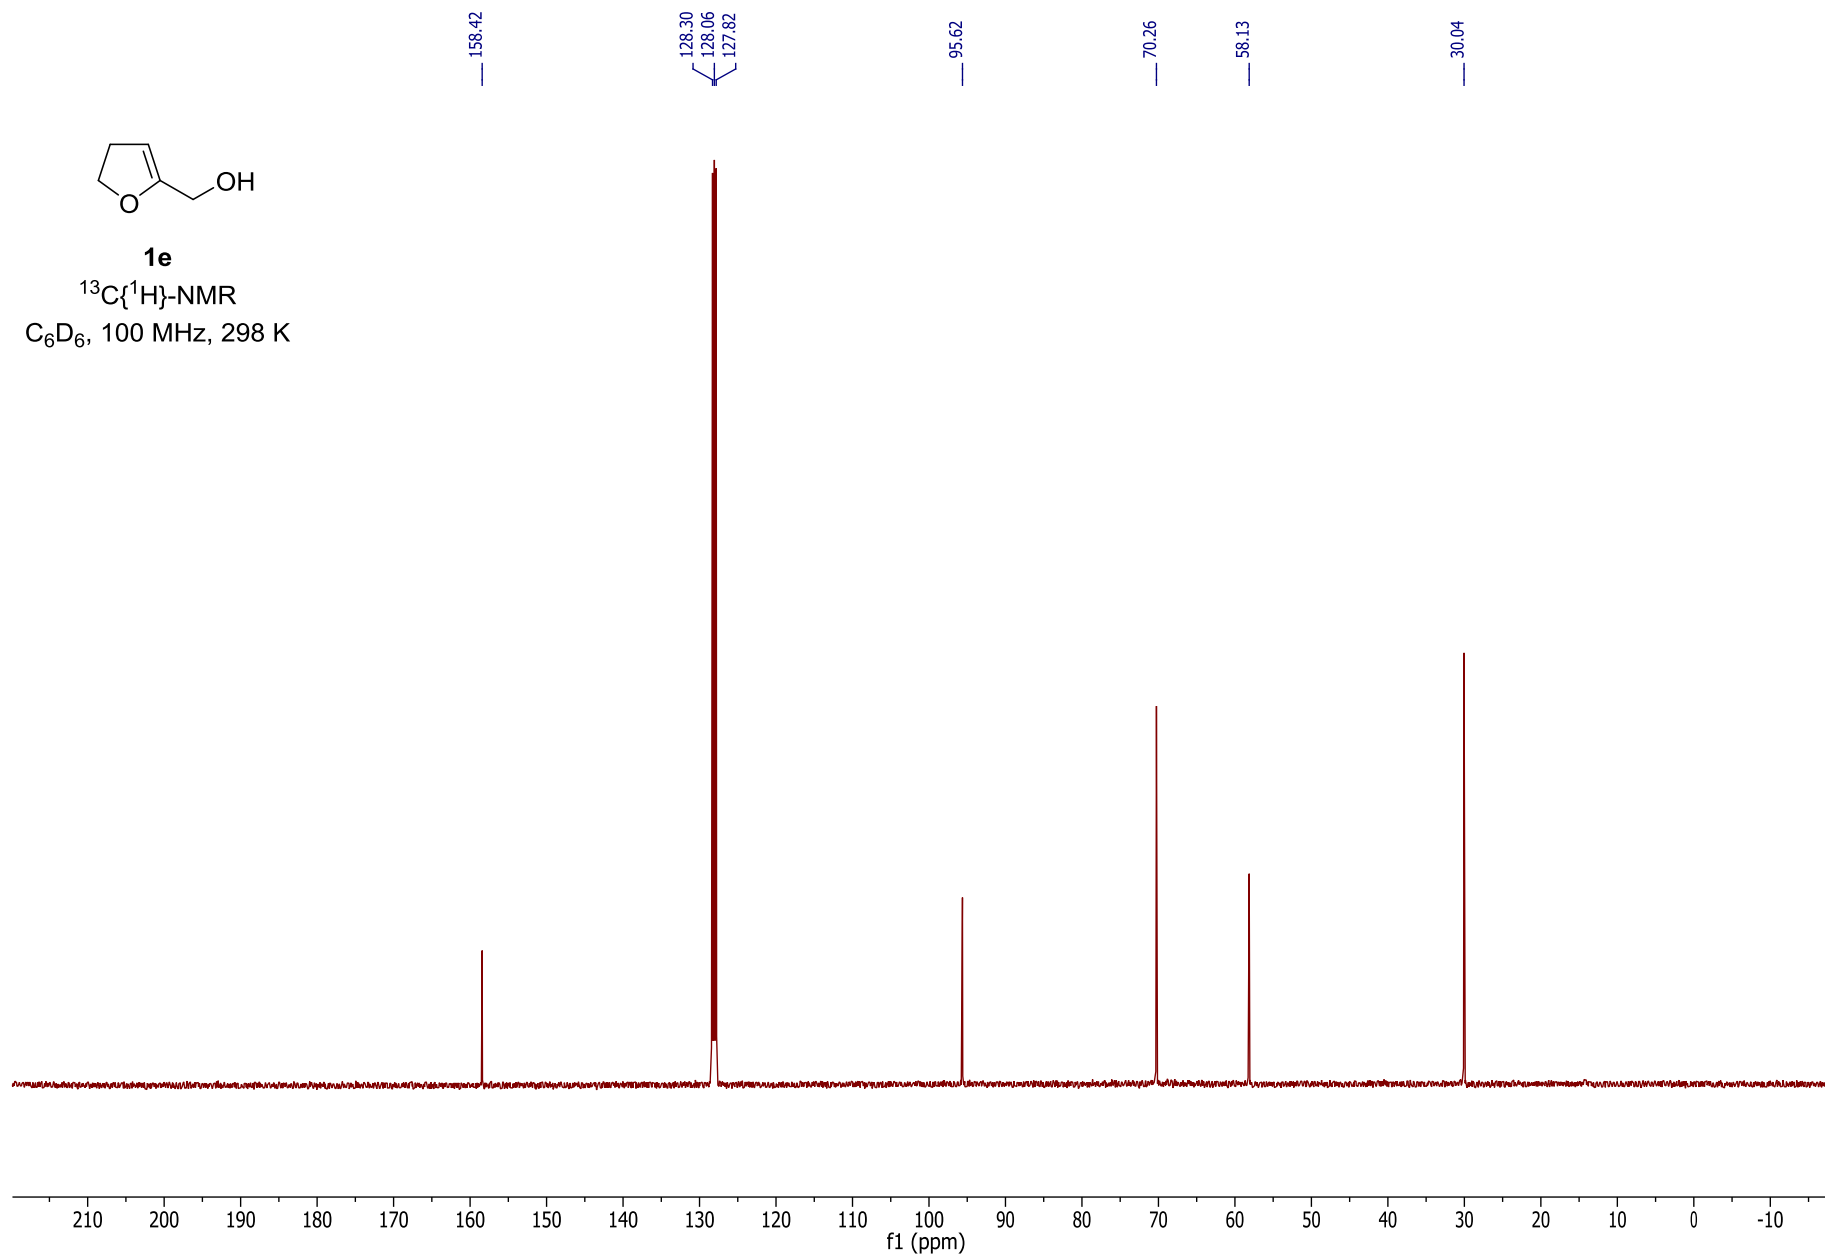

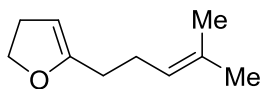**1f**<sup>1</sup>H-NMRC<sub>6</sub>D<sub>6</sub>, 400 MHz, 298 K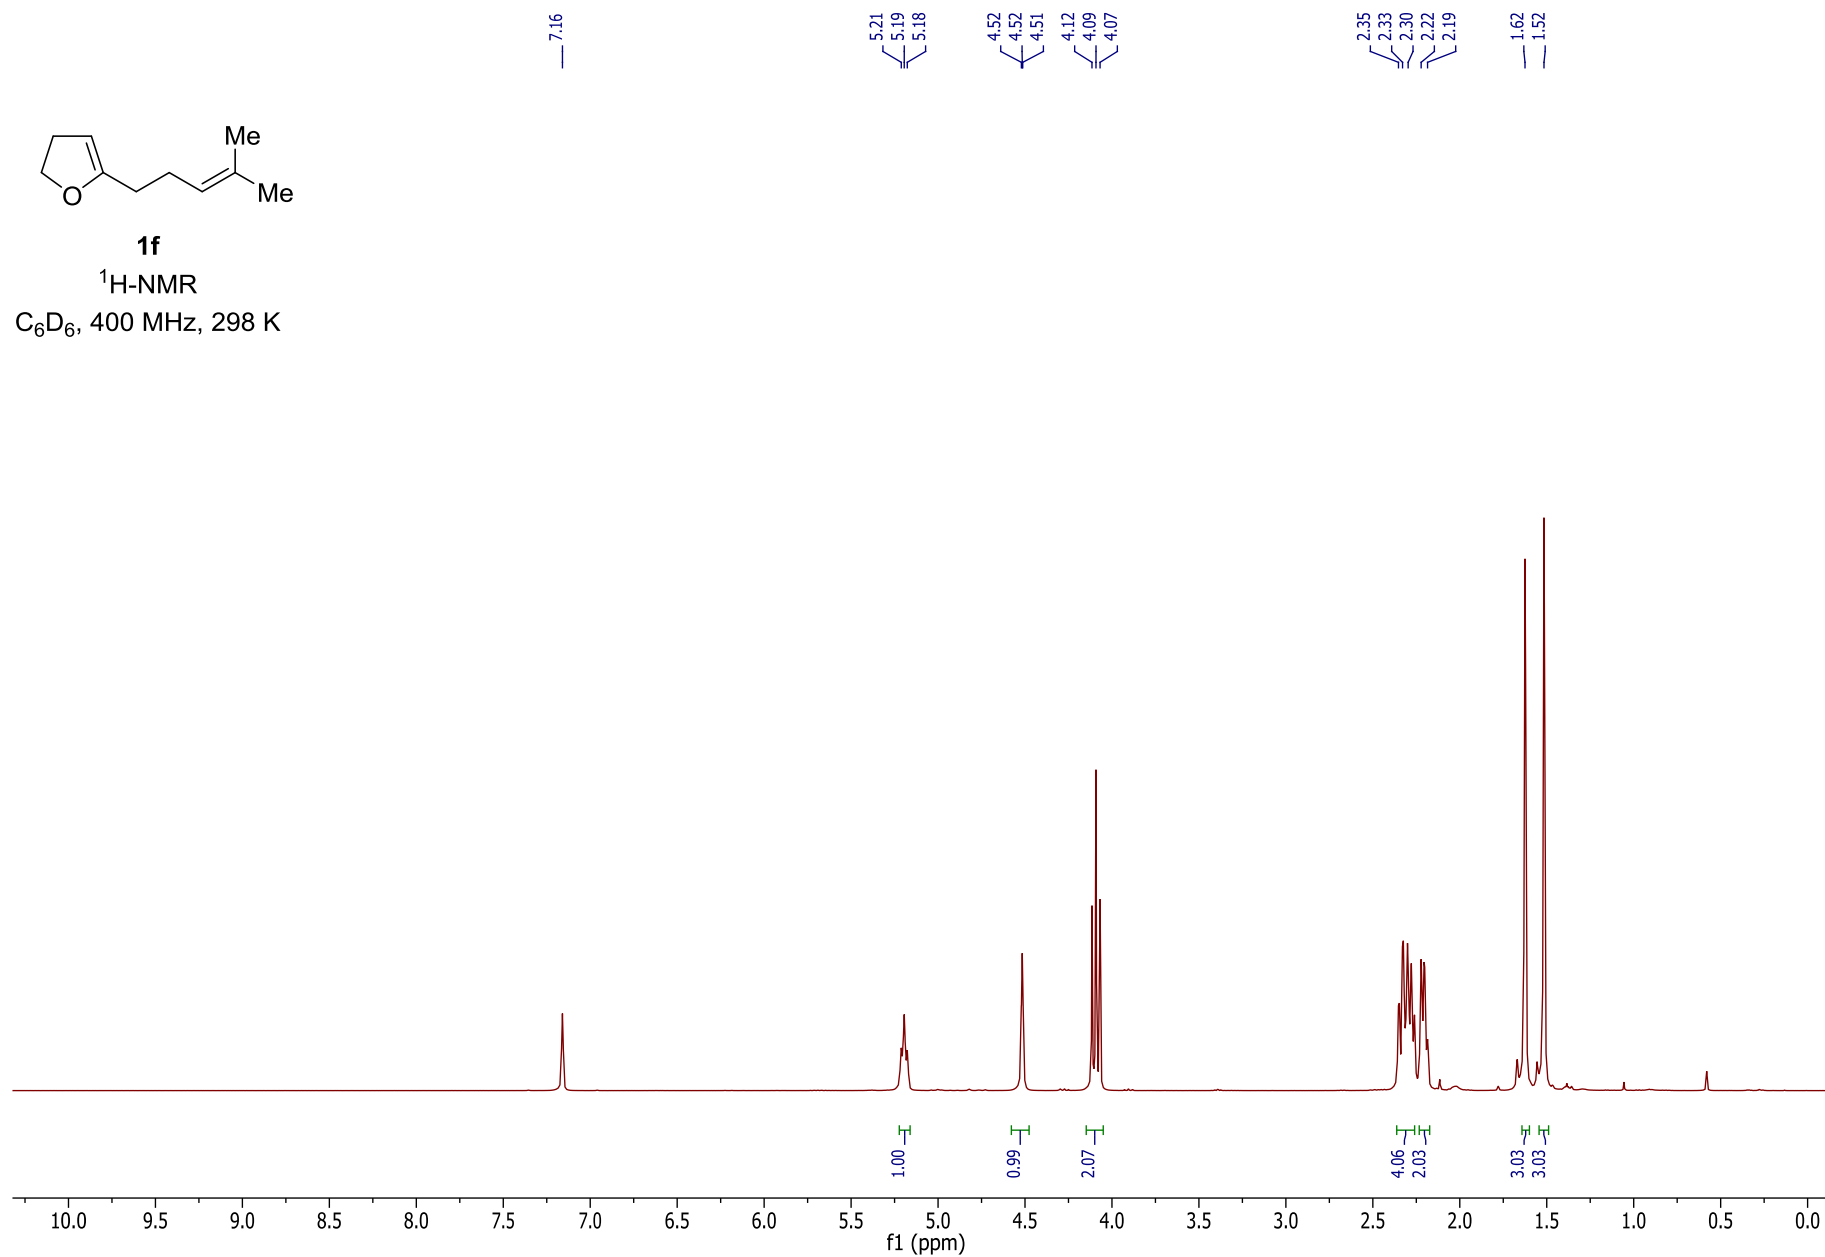

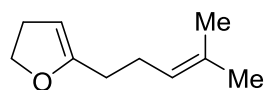**1f** $^{13}\text{C}\{^1\text{H}\}$ -NMR  
 $\text{C}_6\text{D}_6$ , 100 MHz, 298 K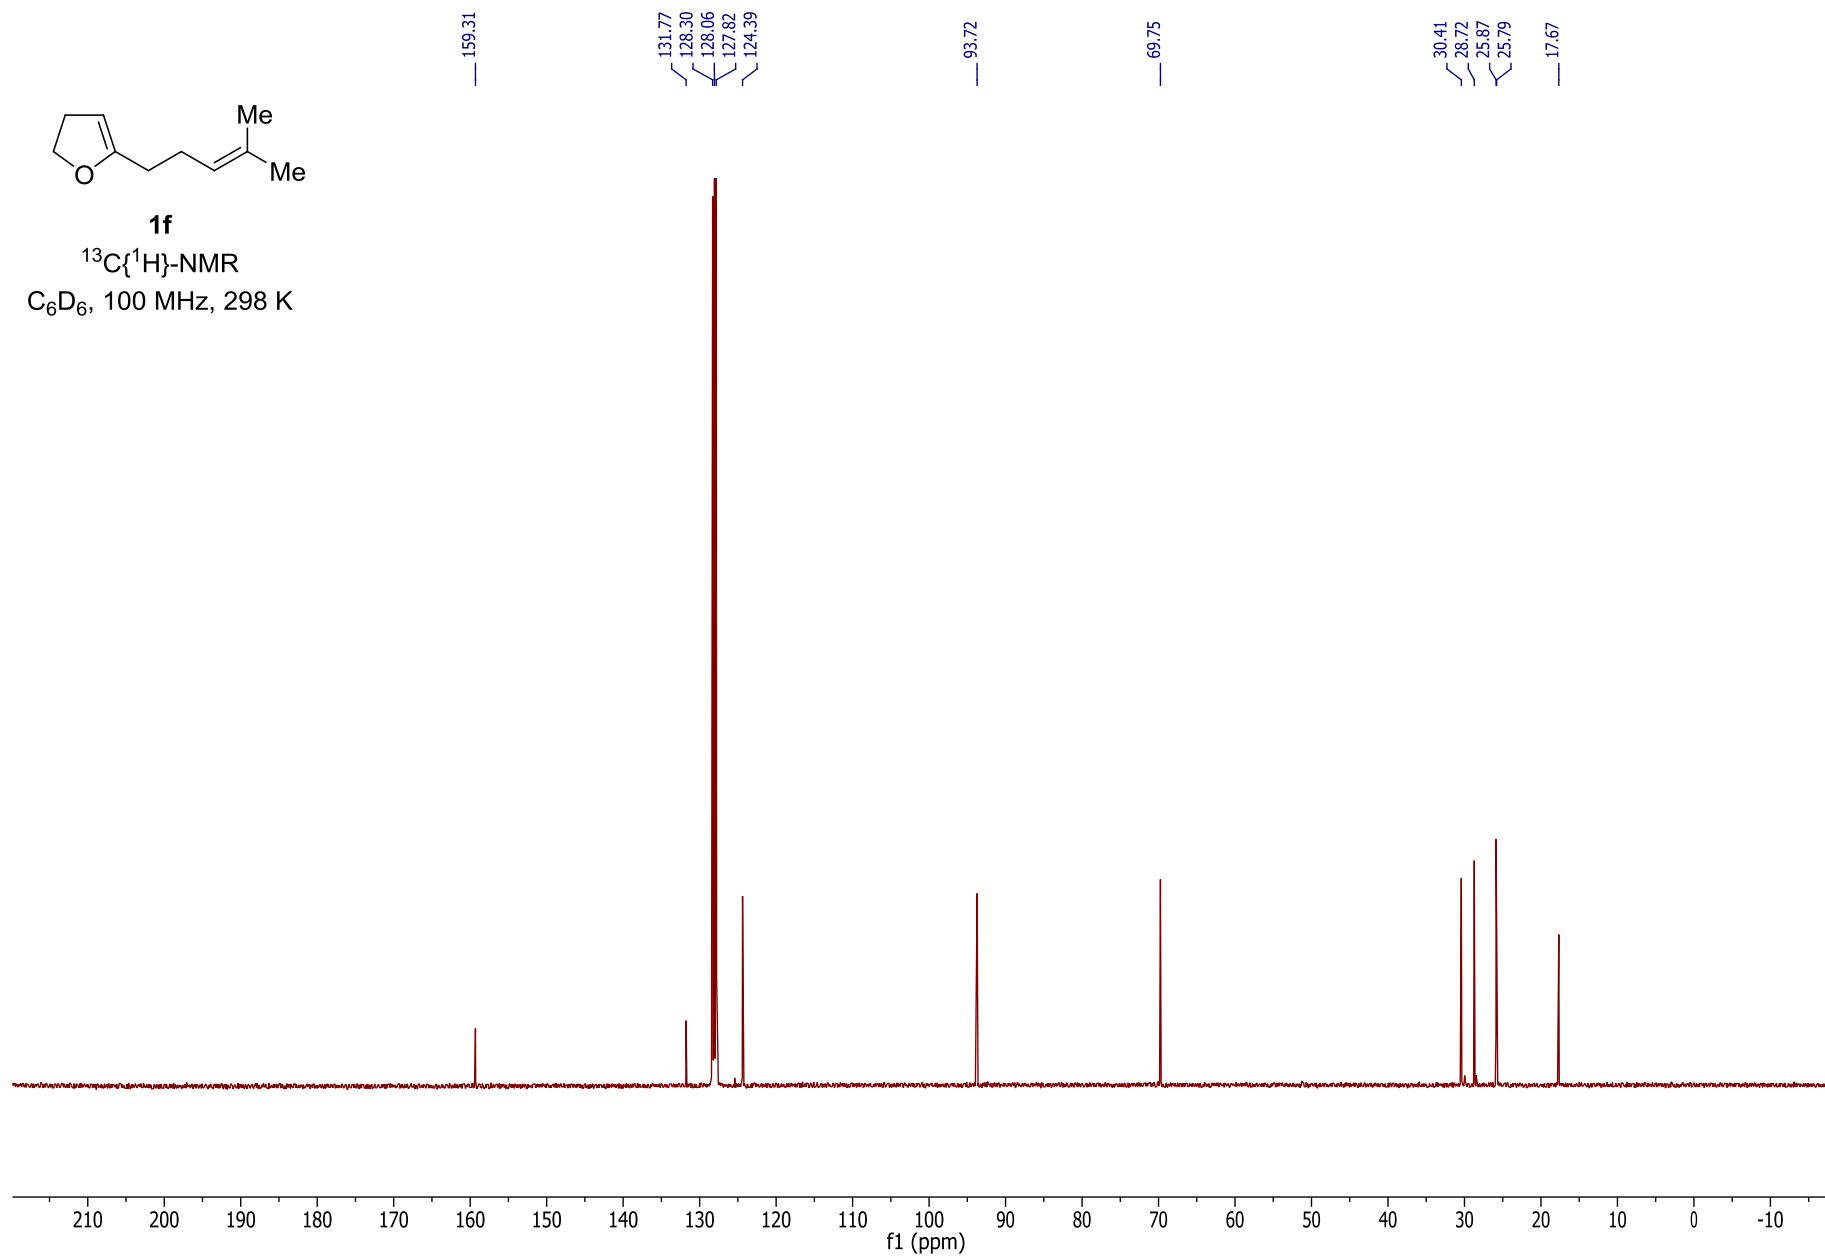

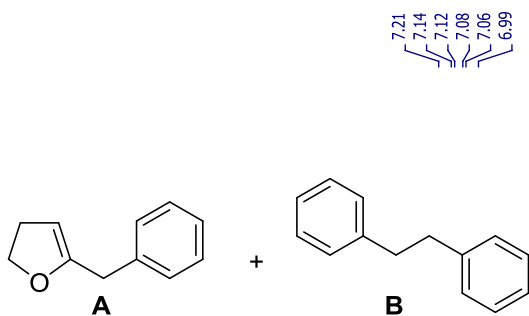

**1g**  
<sup>1</sup>H-NMR  
C<sub>6</sub>D<sub>6</sub>, 400 MHz, 298 K

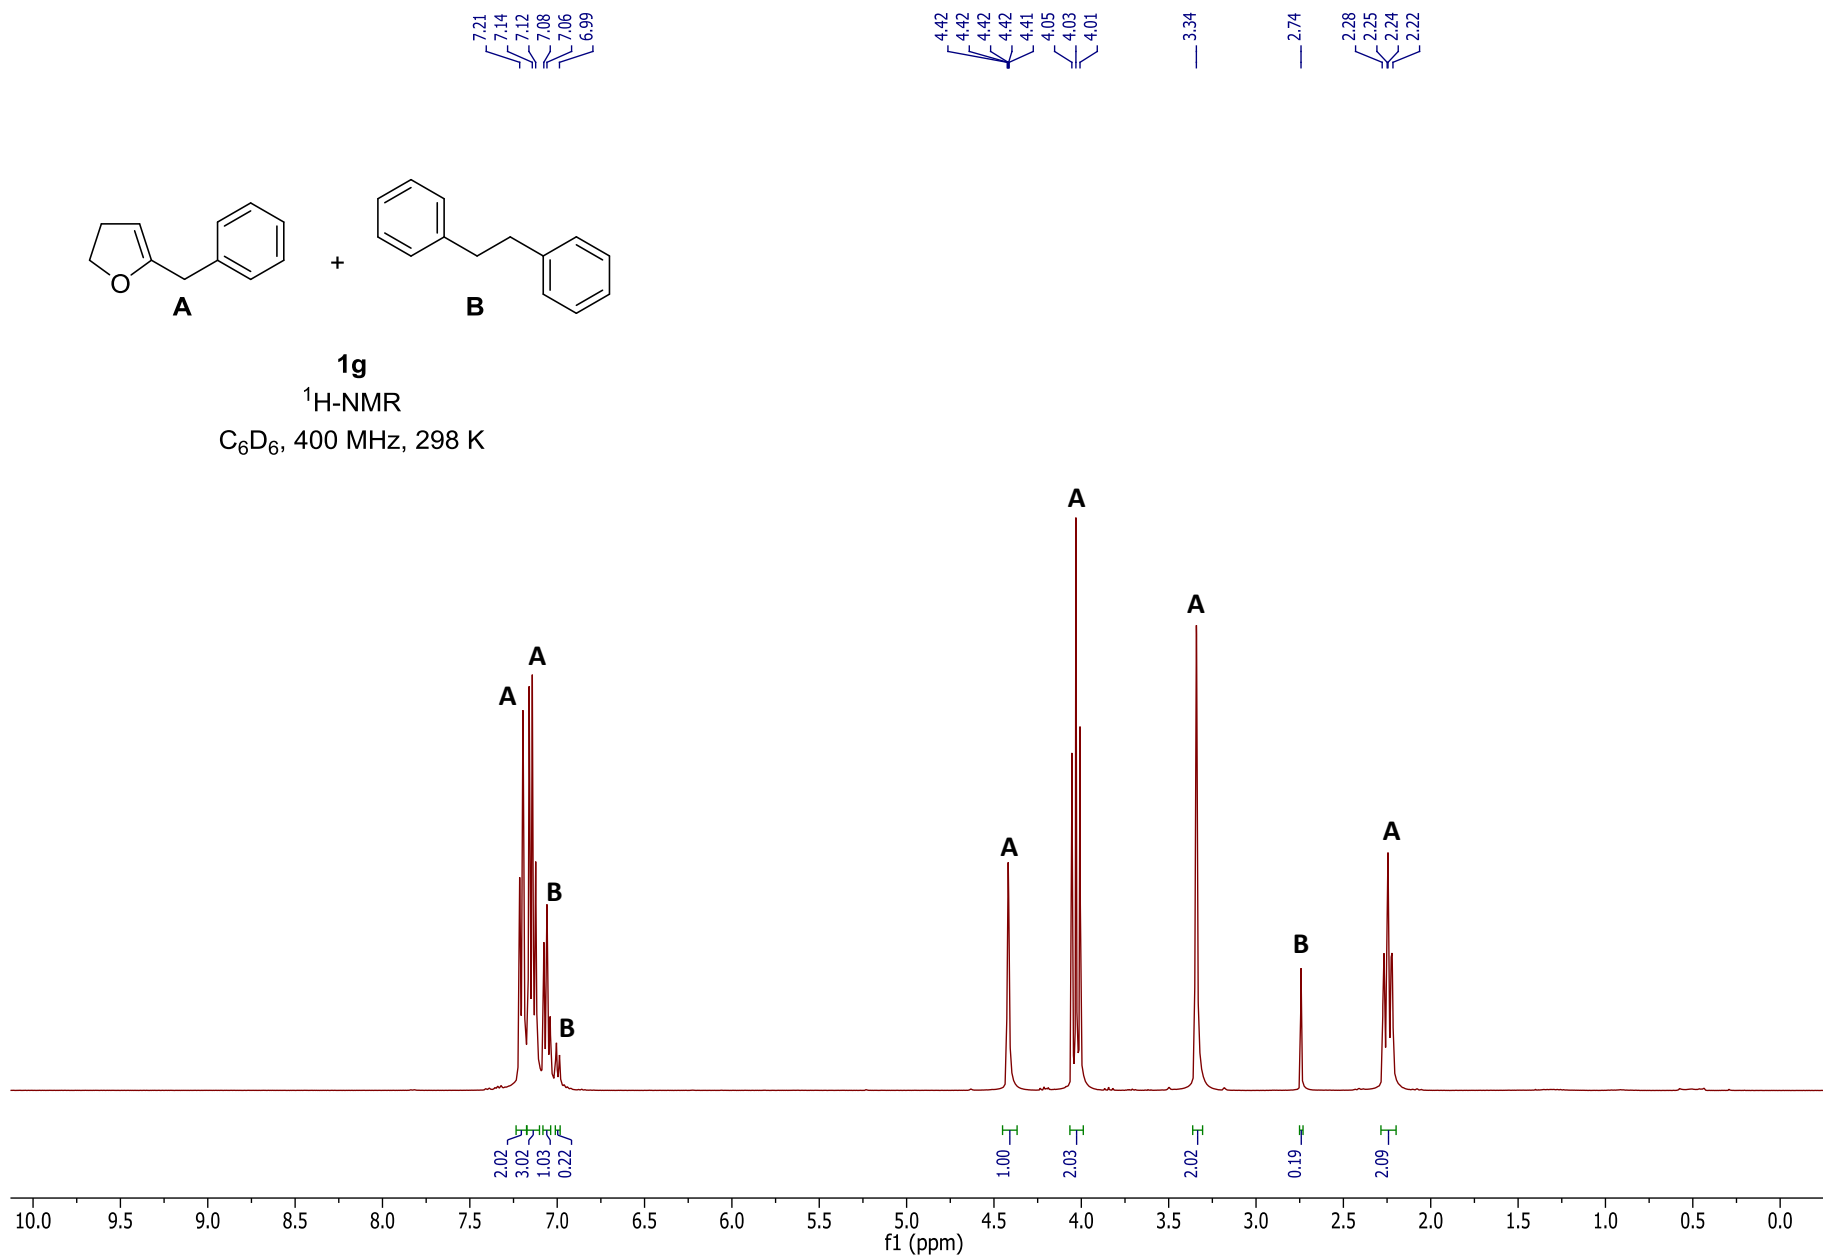

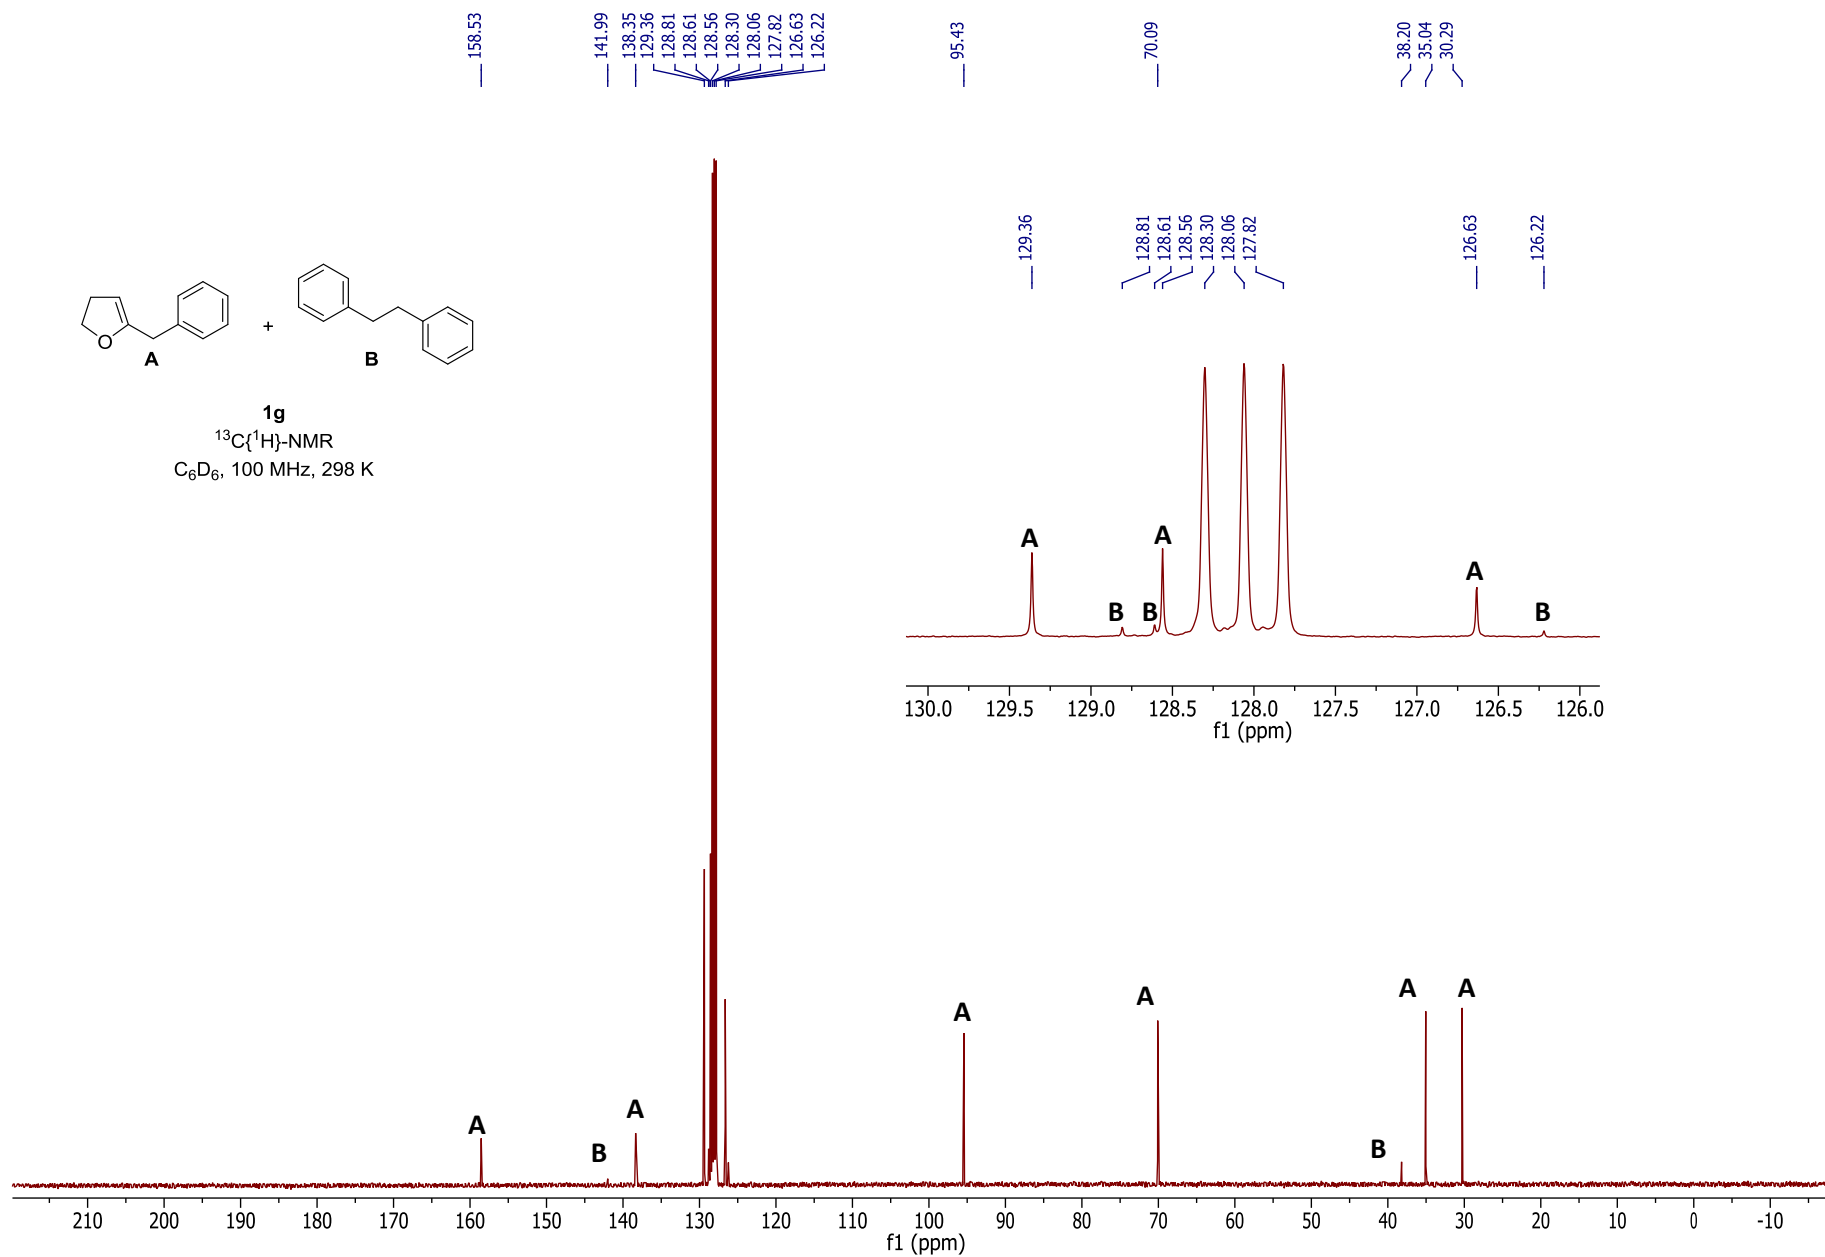

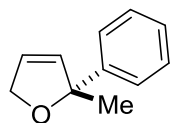**3a**<sup>1</sup>H-NMRC<sub>6</sub>D<sub>6</sub>, 400 MHz, 298 K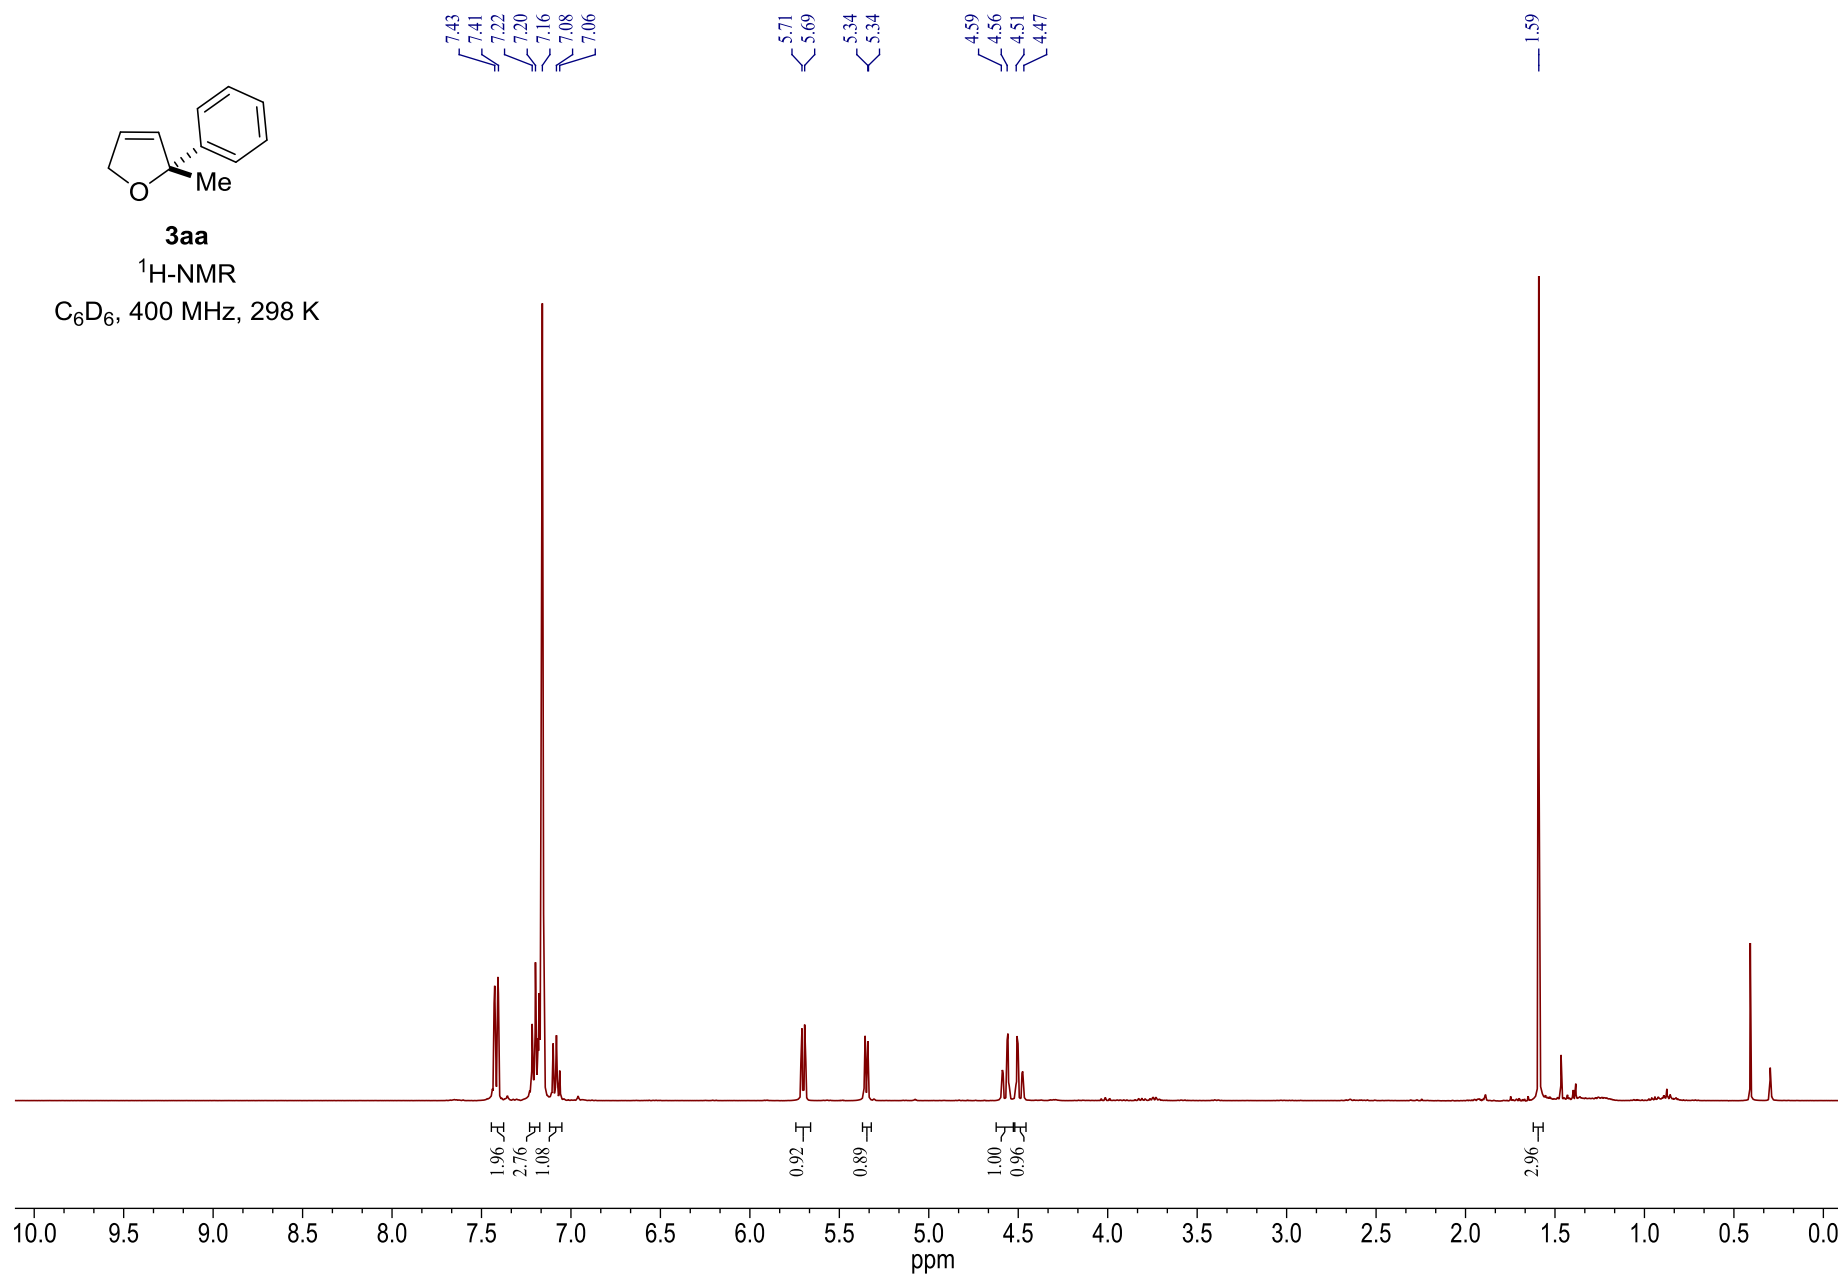



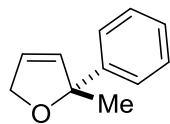**3aa** $\{^{13}\text{C}\}^1\text{H-NMR}$  $\text{C}_6\text{D}_6$ , 125 MHz, 298 K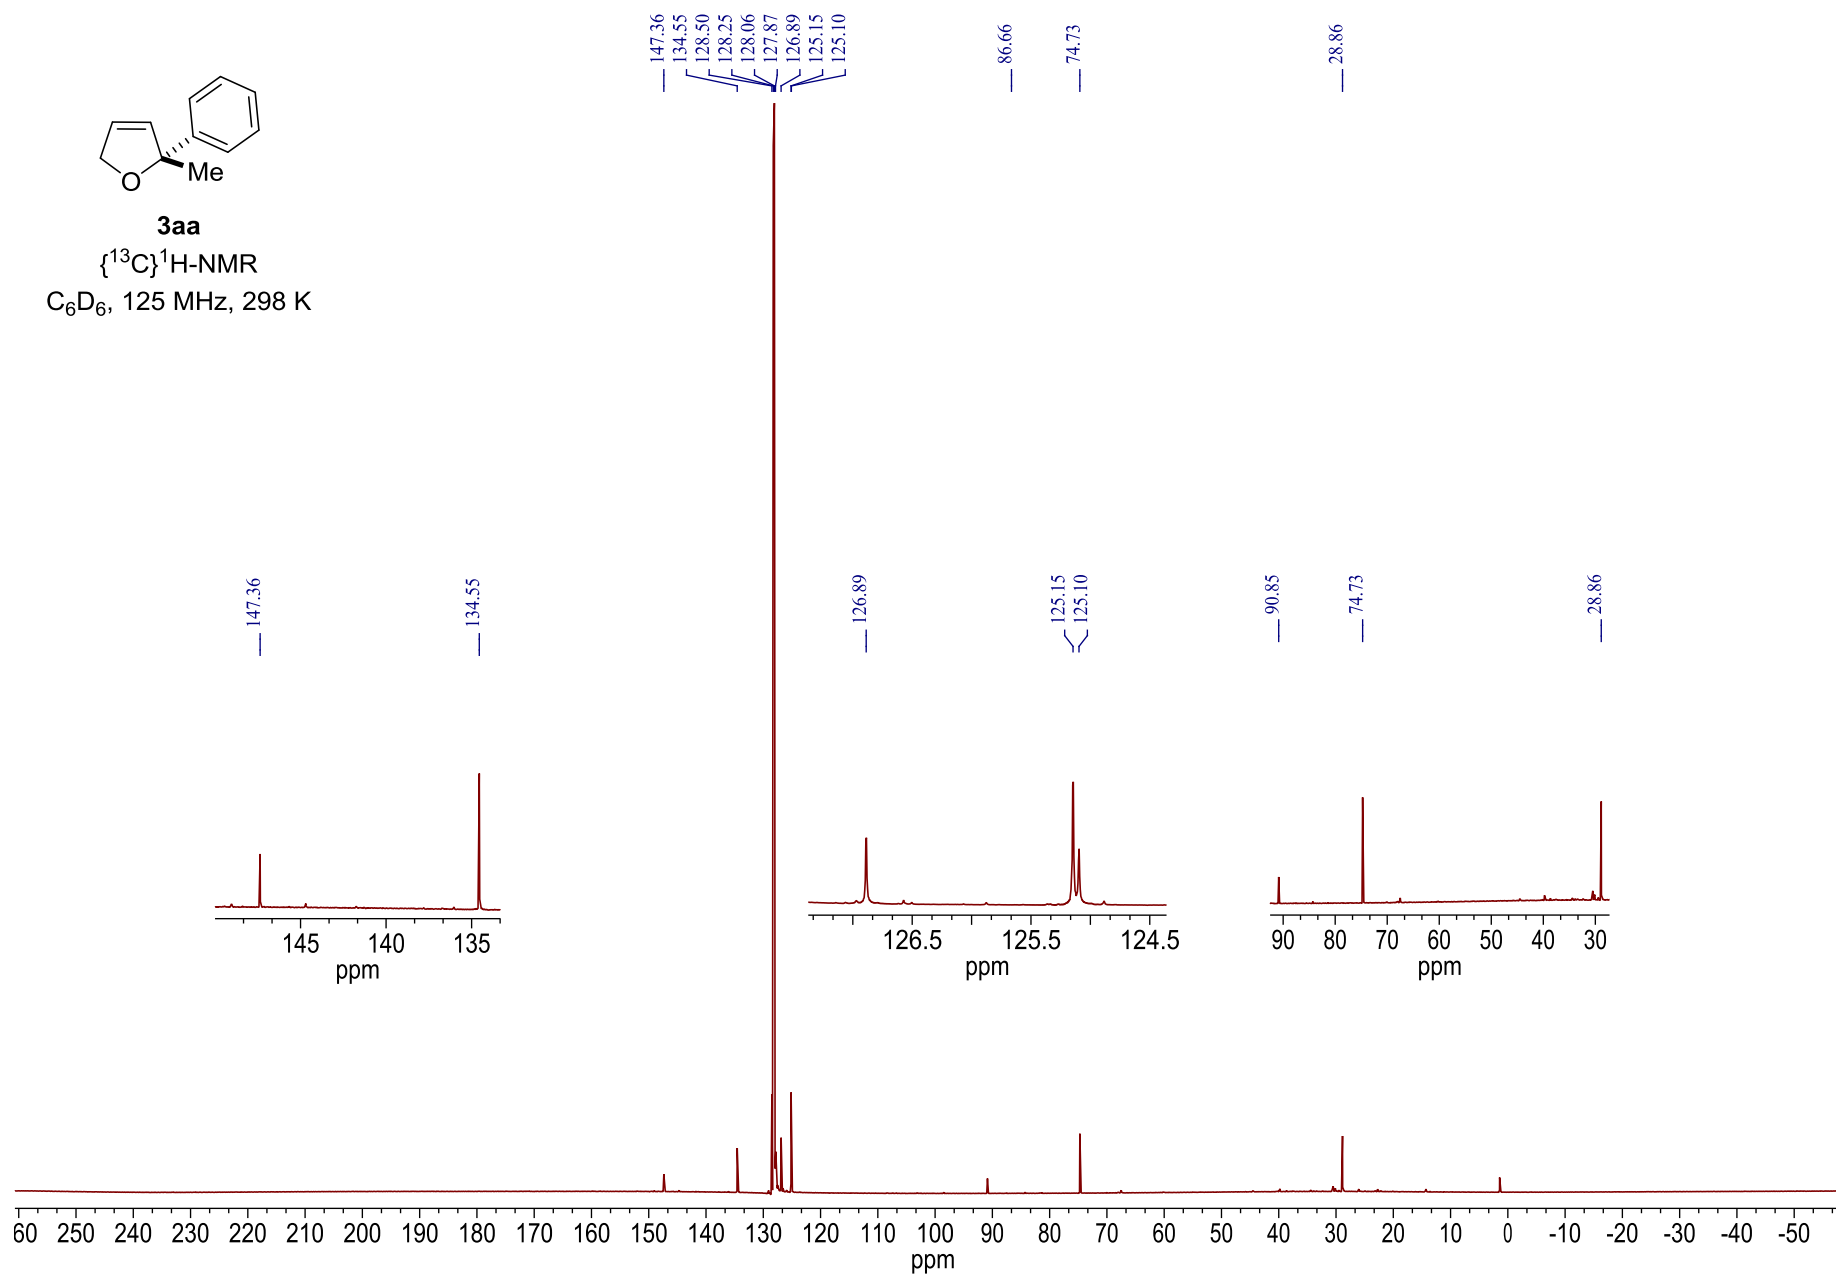

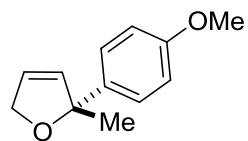**3ab**<sup>1</sup>H-NMRC<sub>6</sub>D<sub>6</sub>, 400 MHz, 298 K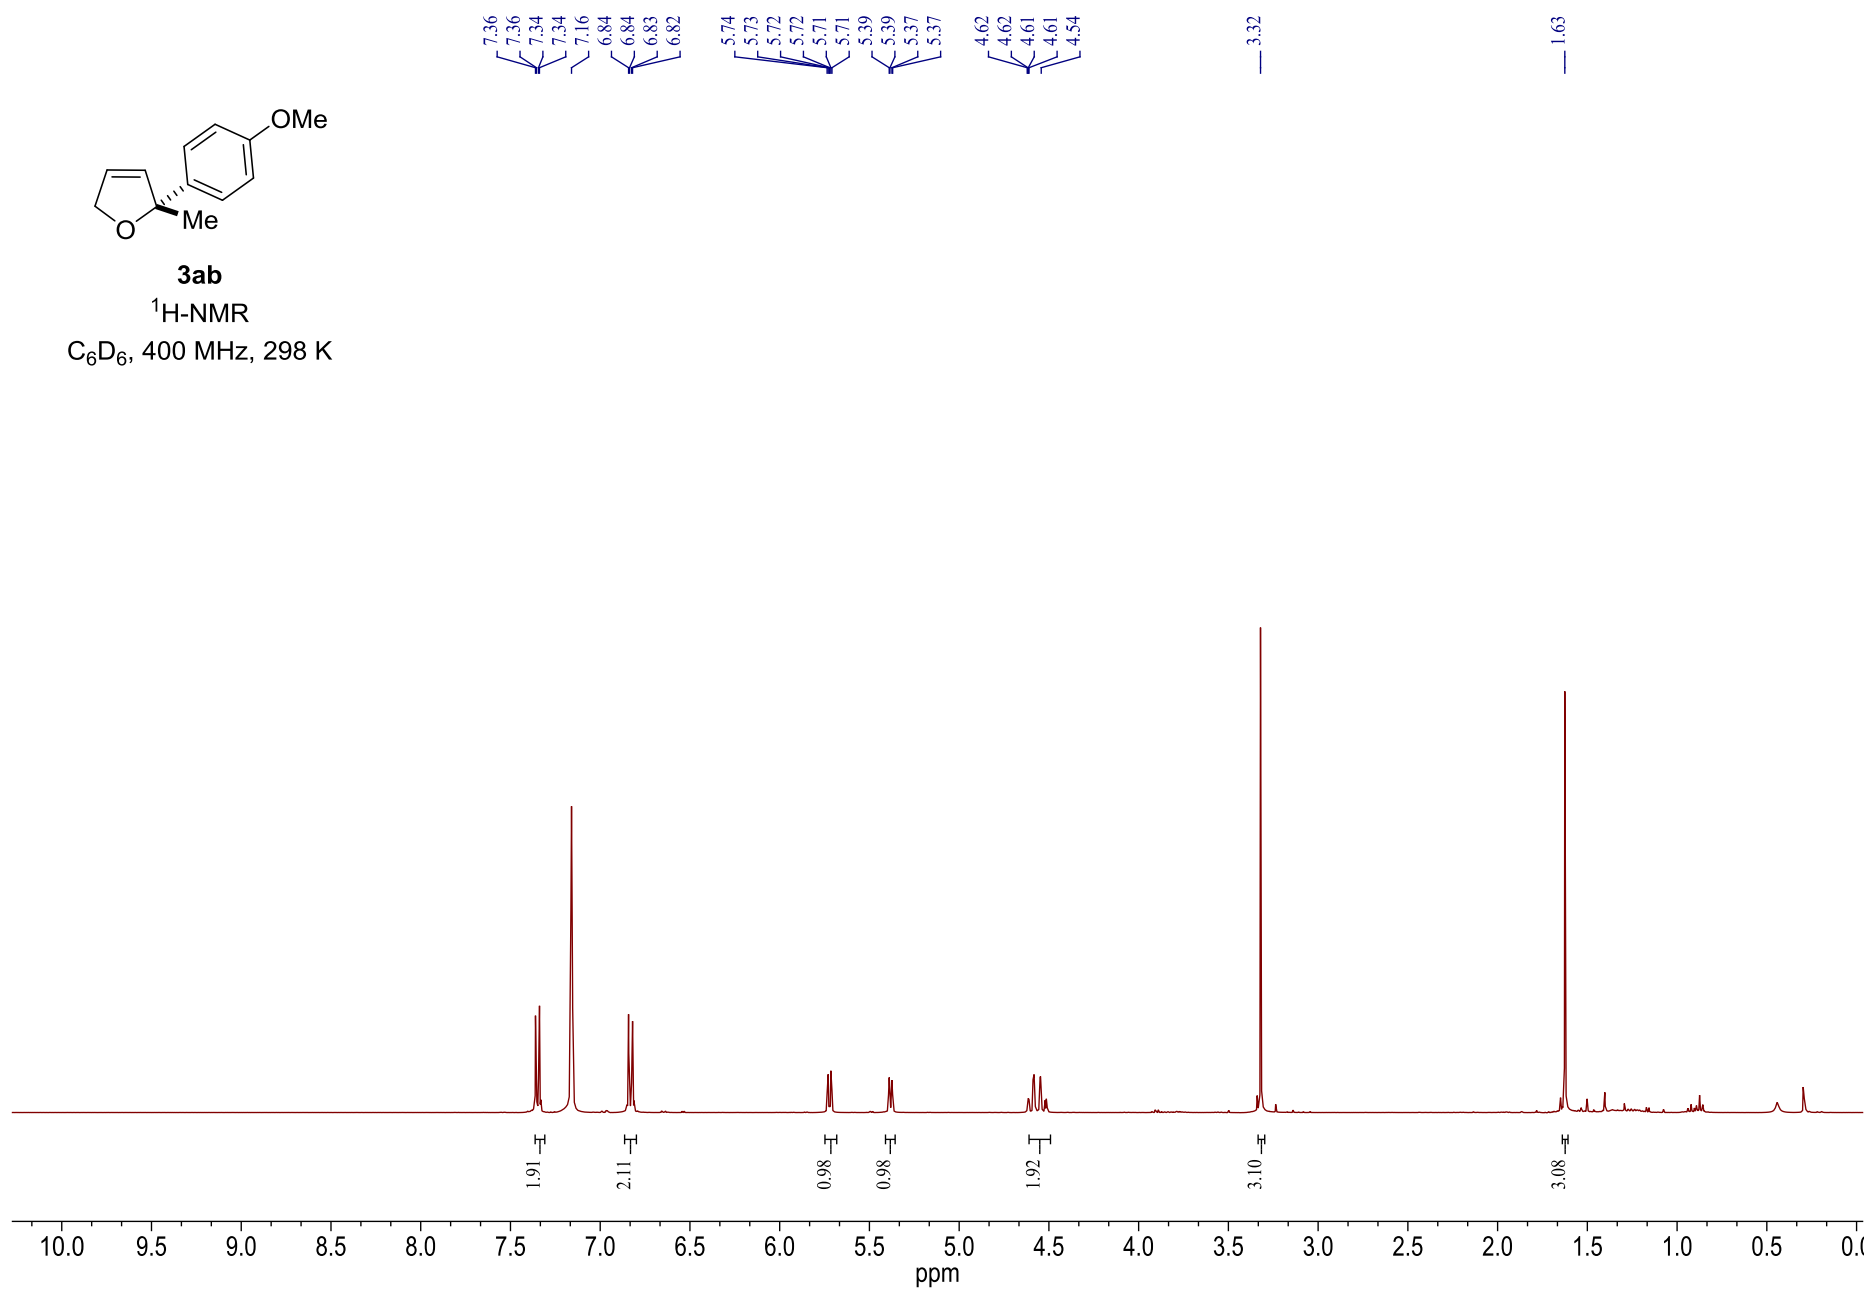

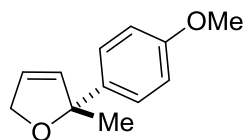**3ab**

$^{13}\text{C}\{^1\text{H}\}$ -NMR  
 $\text{C}_6\text{D}_6$ , 100 MHz, 298 K

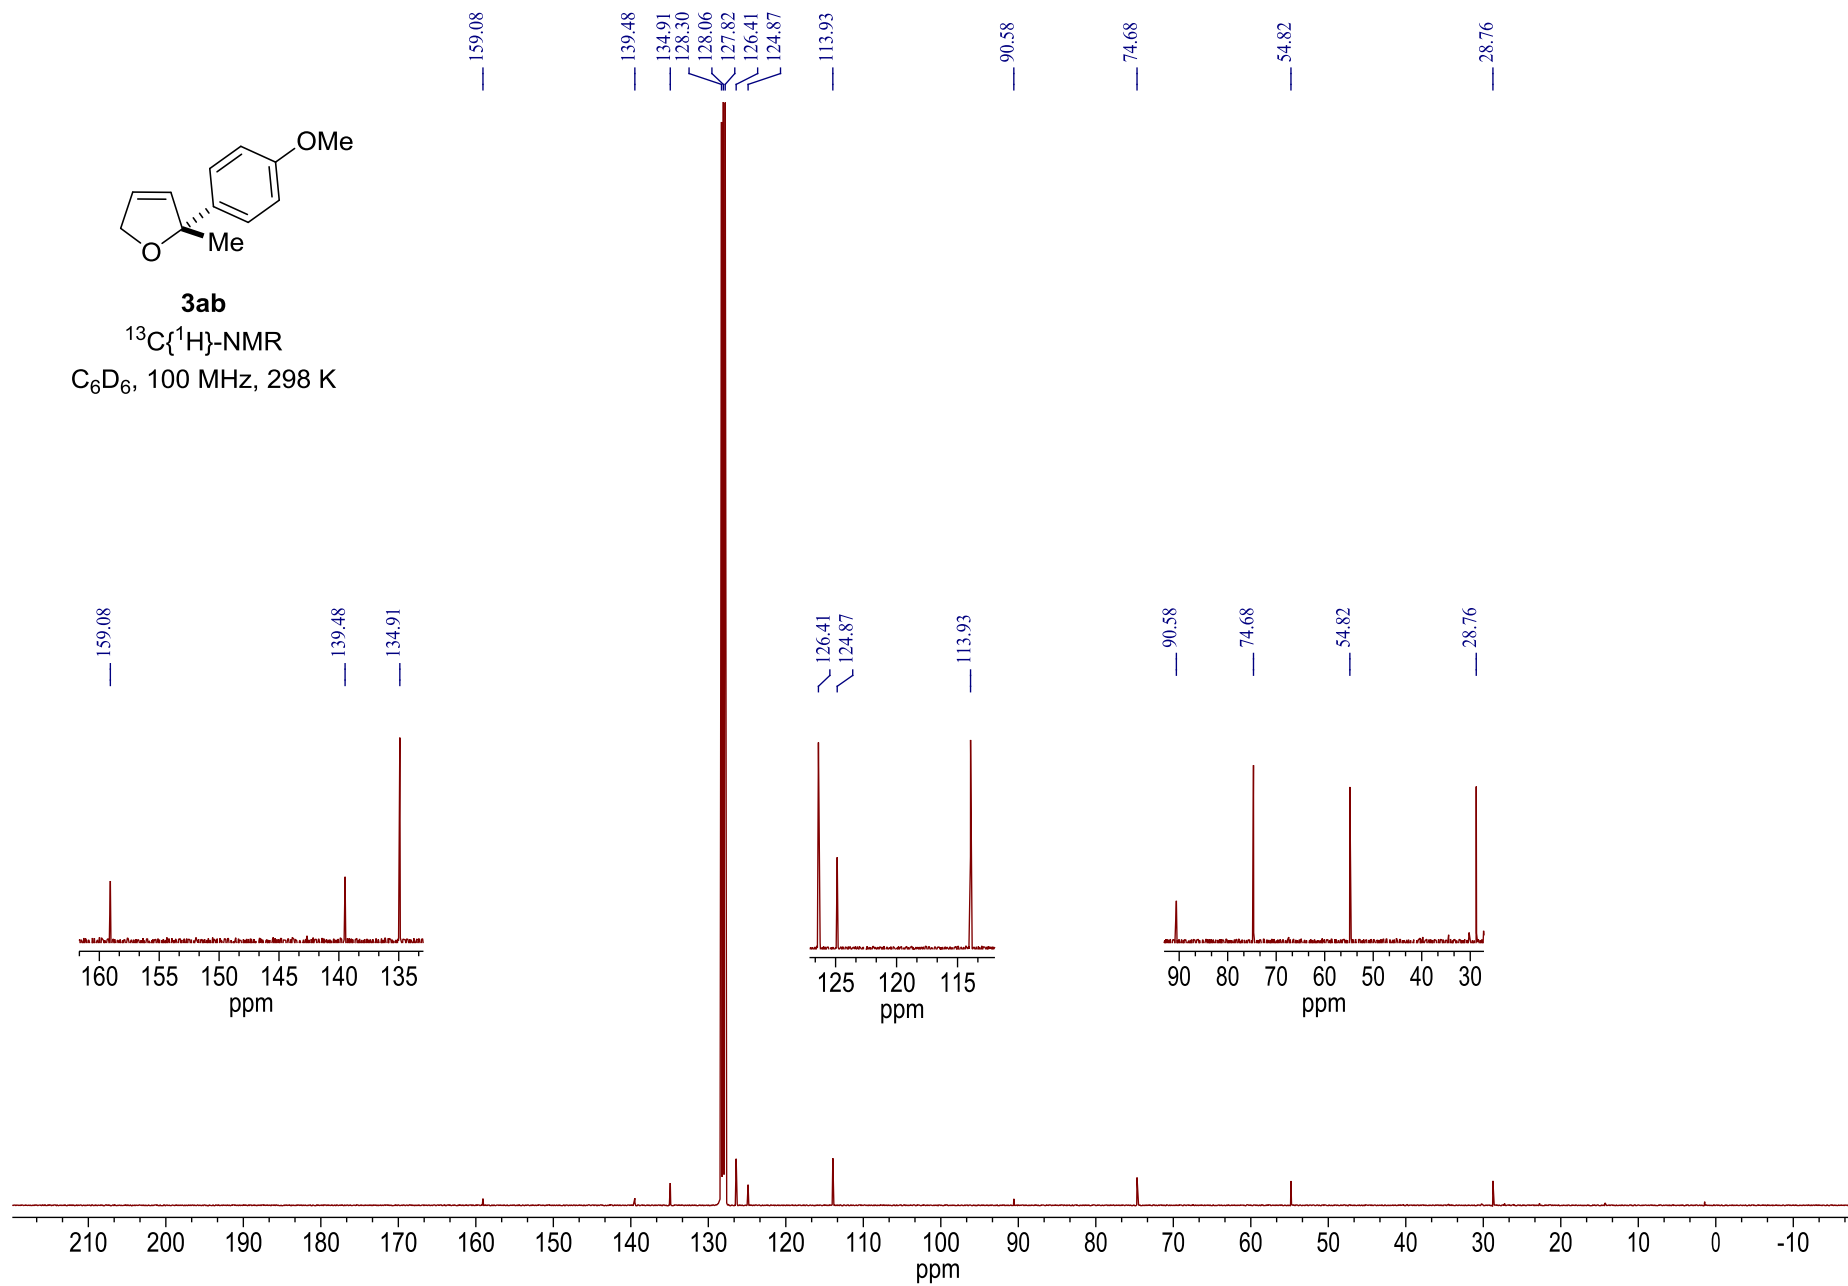

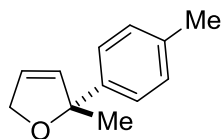**3ad**<sup>1</sup>H-NMRC<sub>6</sub>D<sub>6</sub>, 400 MHz, 298 K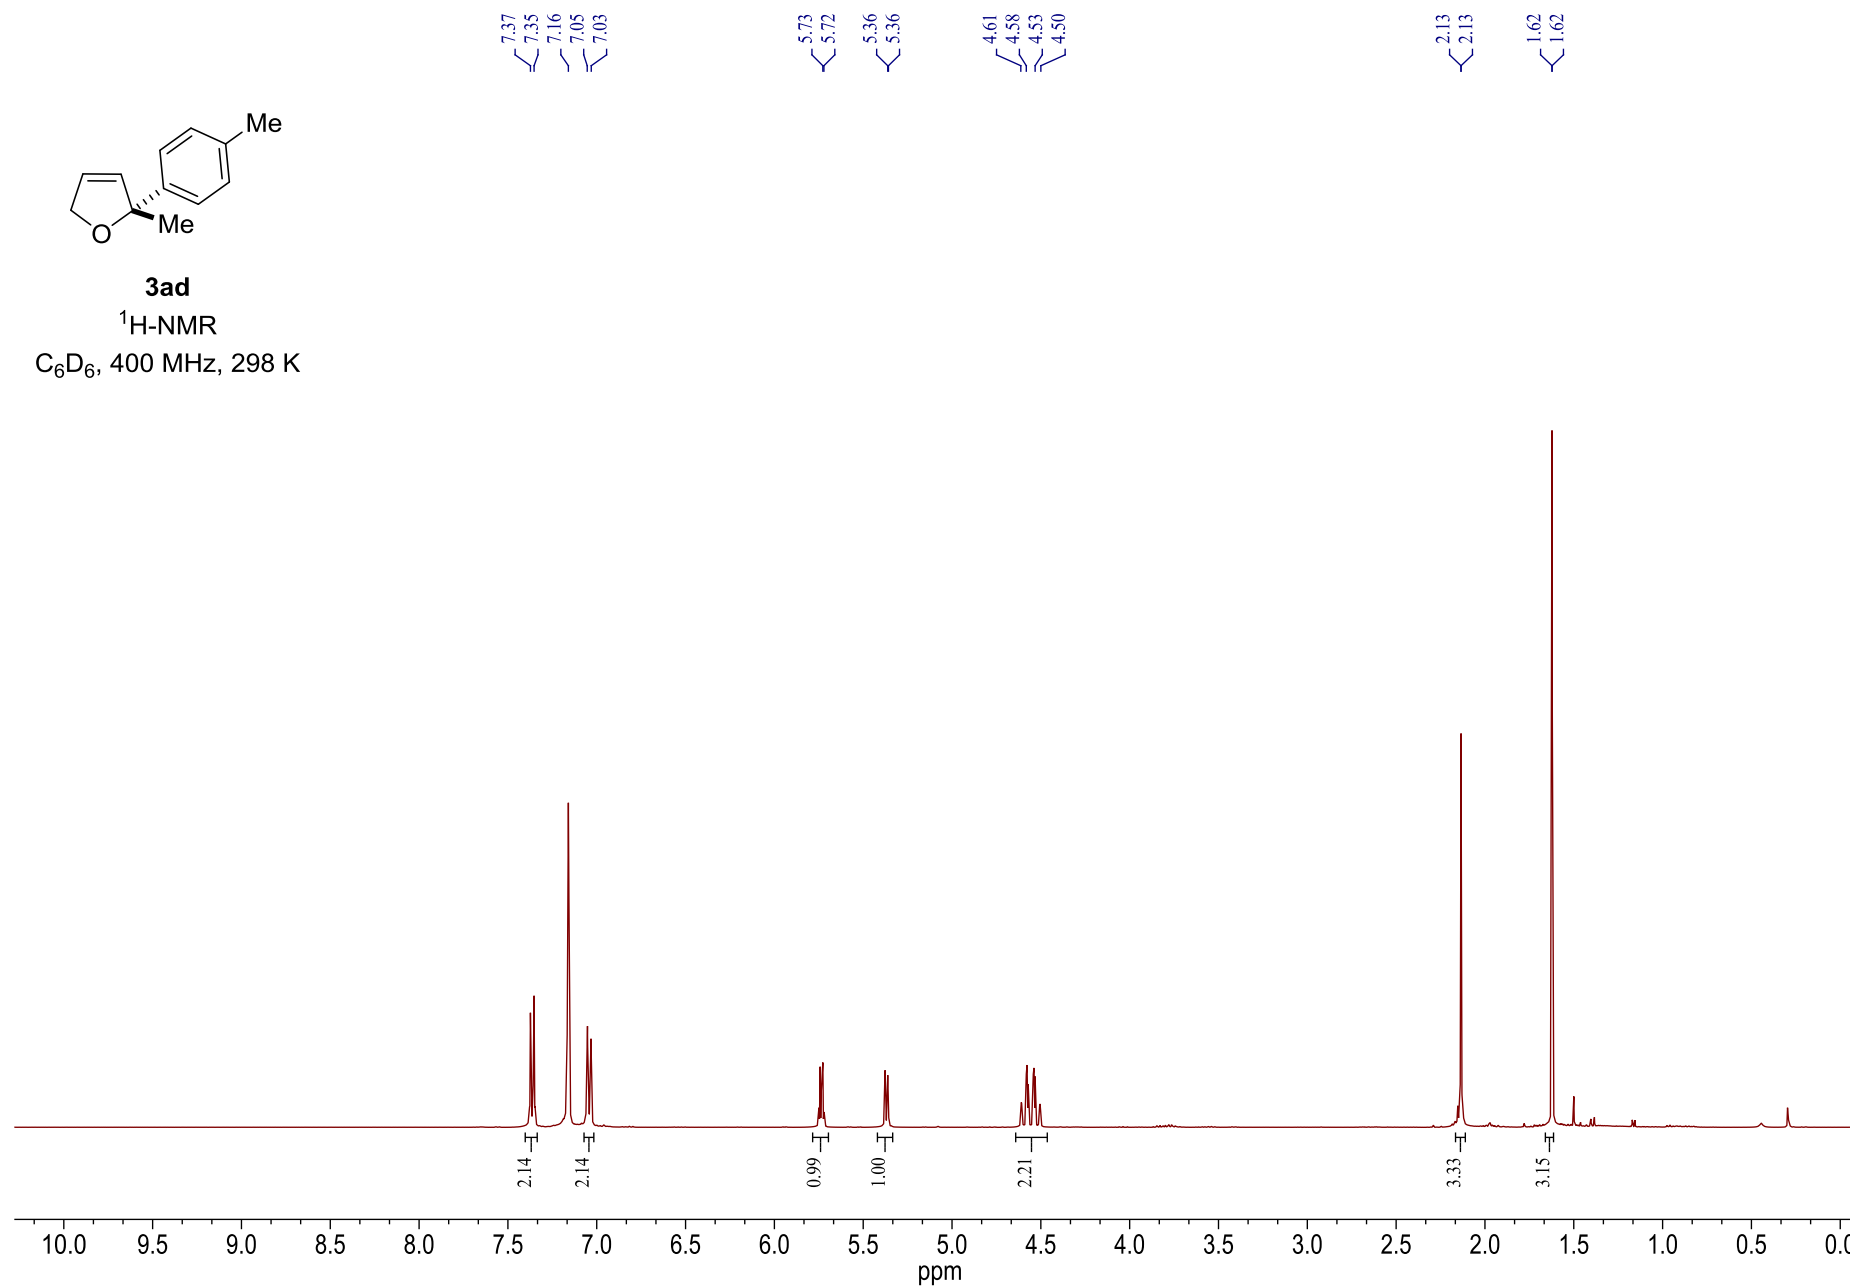

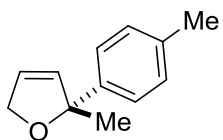**3ad**

$^{13}\text{C}\{^1\text{H}\}$ -NMR  
 $\text{C}_6\text{D}_6$ , 100 MHz, 298 K

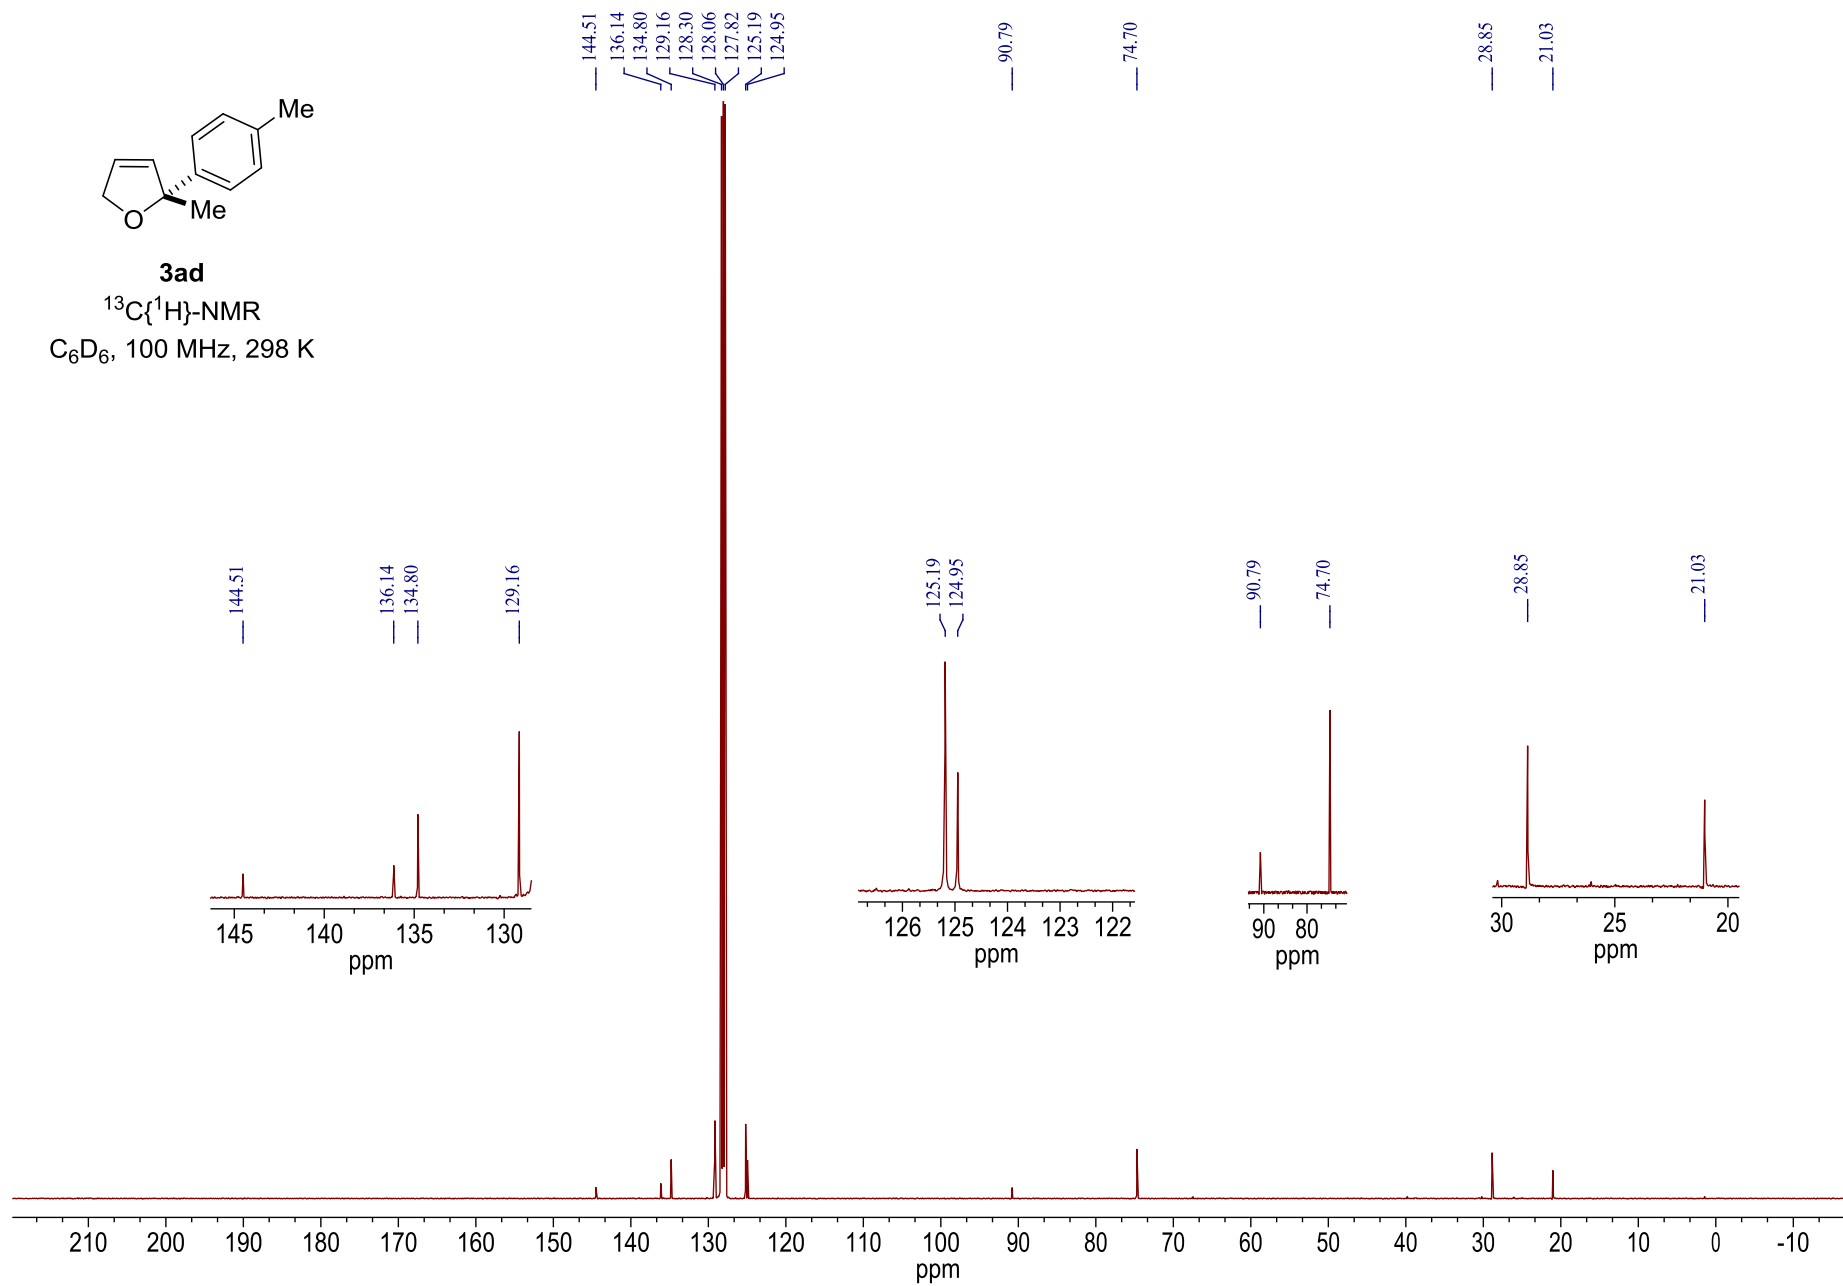

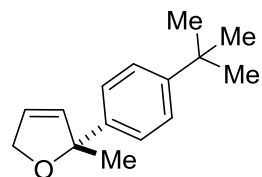**3ae**<sup>1</sup>H-NMRC<sub>6</sub>D<sub>6</sub>, 400 MHz, 298 K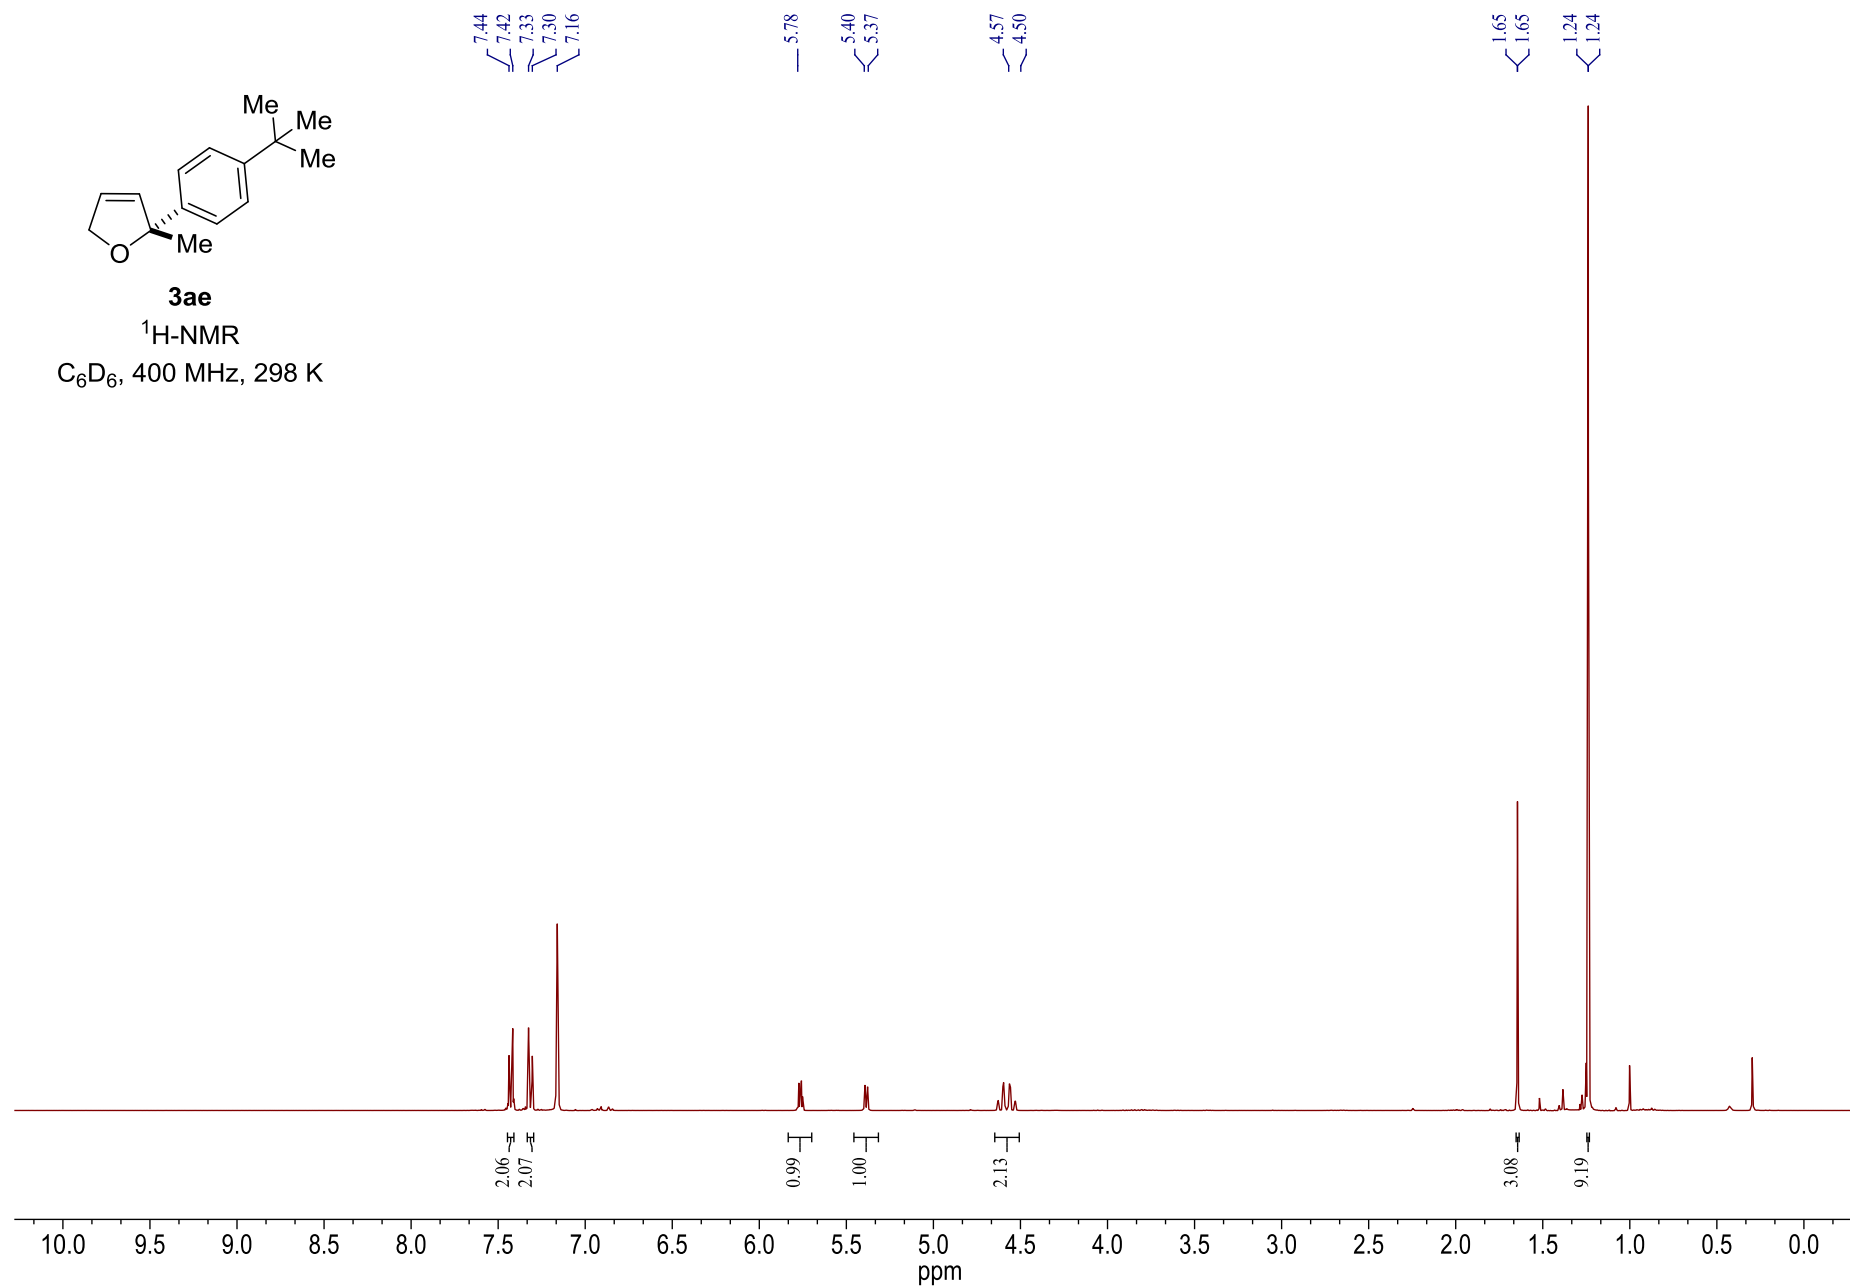

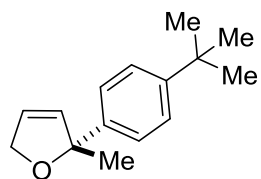**3ae**

$^{13}\text{C}\{^1\text{H}\}$ -NMR  
 $\text{C}_6\text{D}_6$ , 100 MHz, 298 K

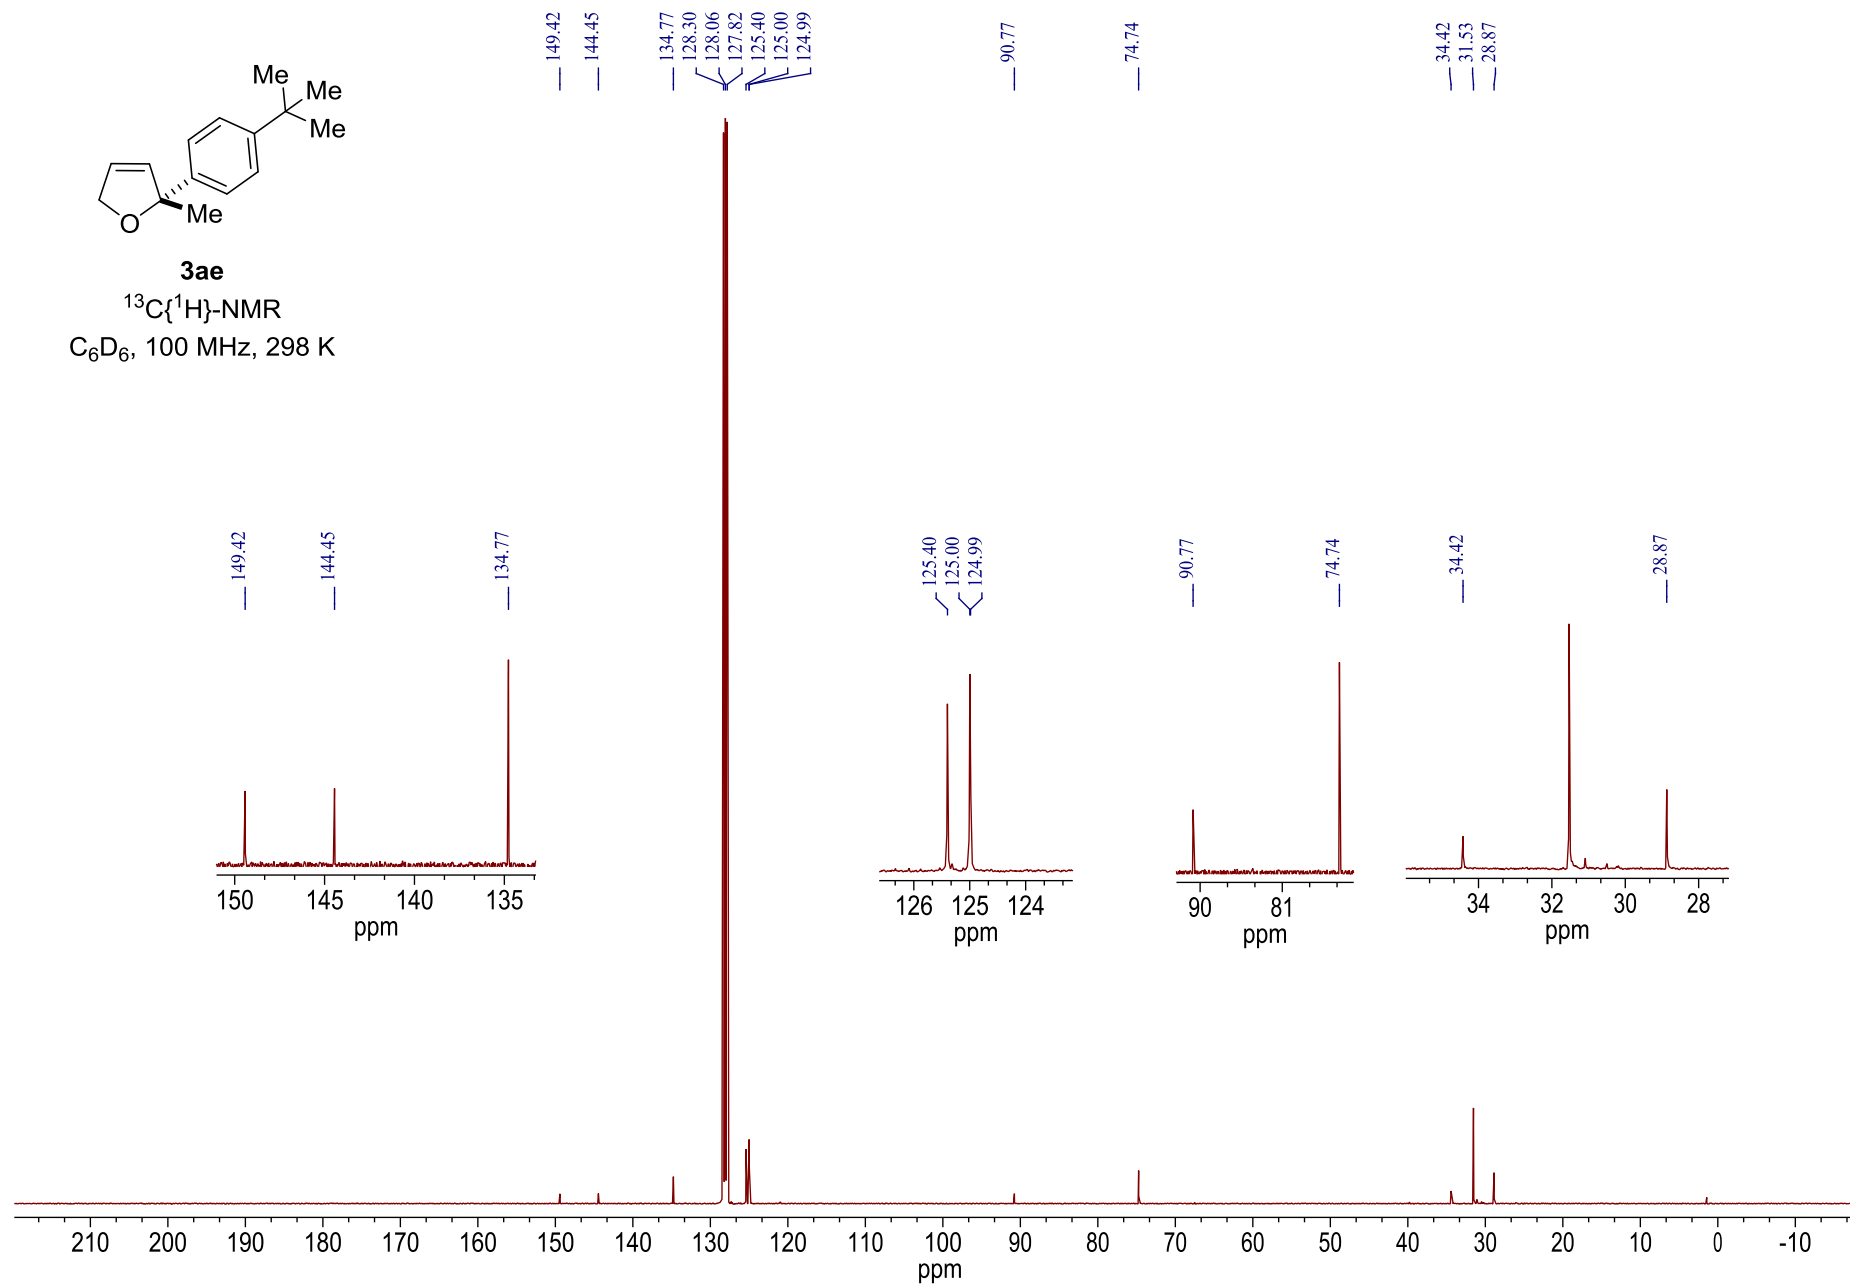

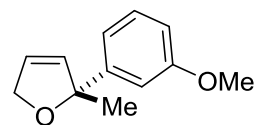**3af**<sup>1</sup>H-NMRC<sub>6</sub>D<sub>6</sub>, 400 MHz, 298 K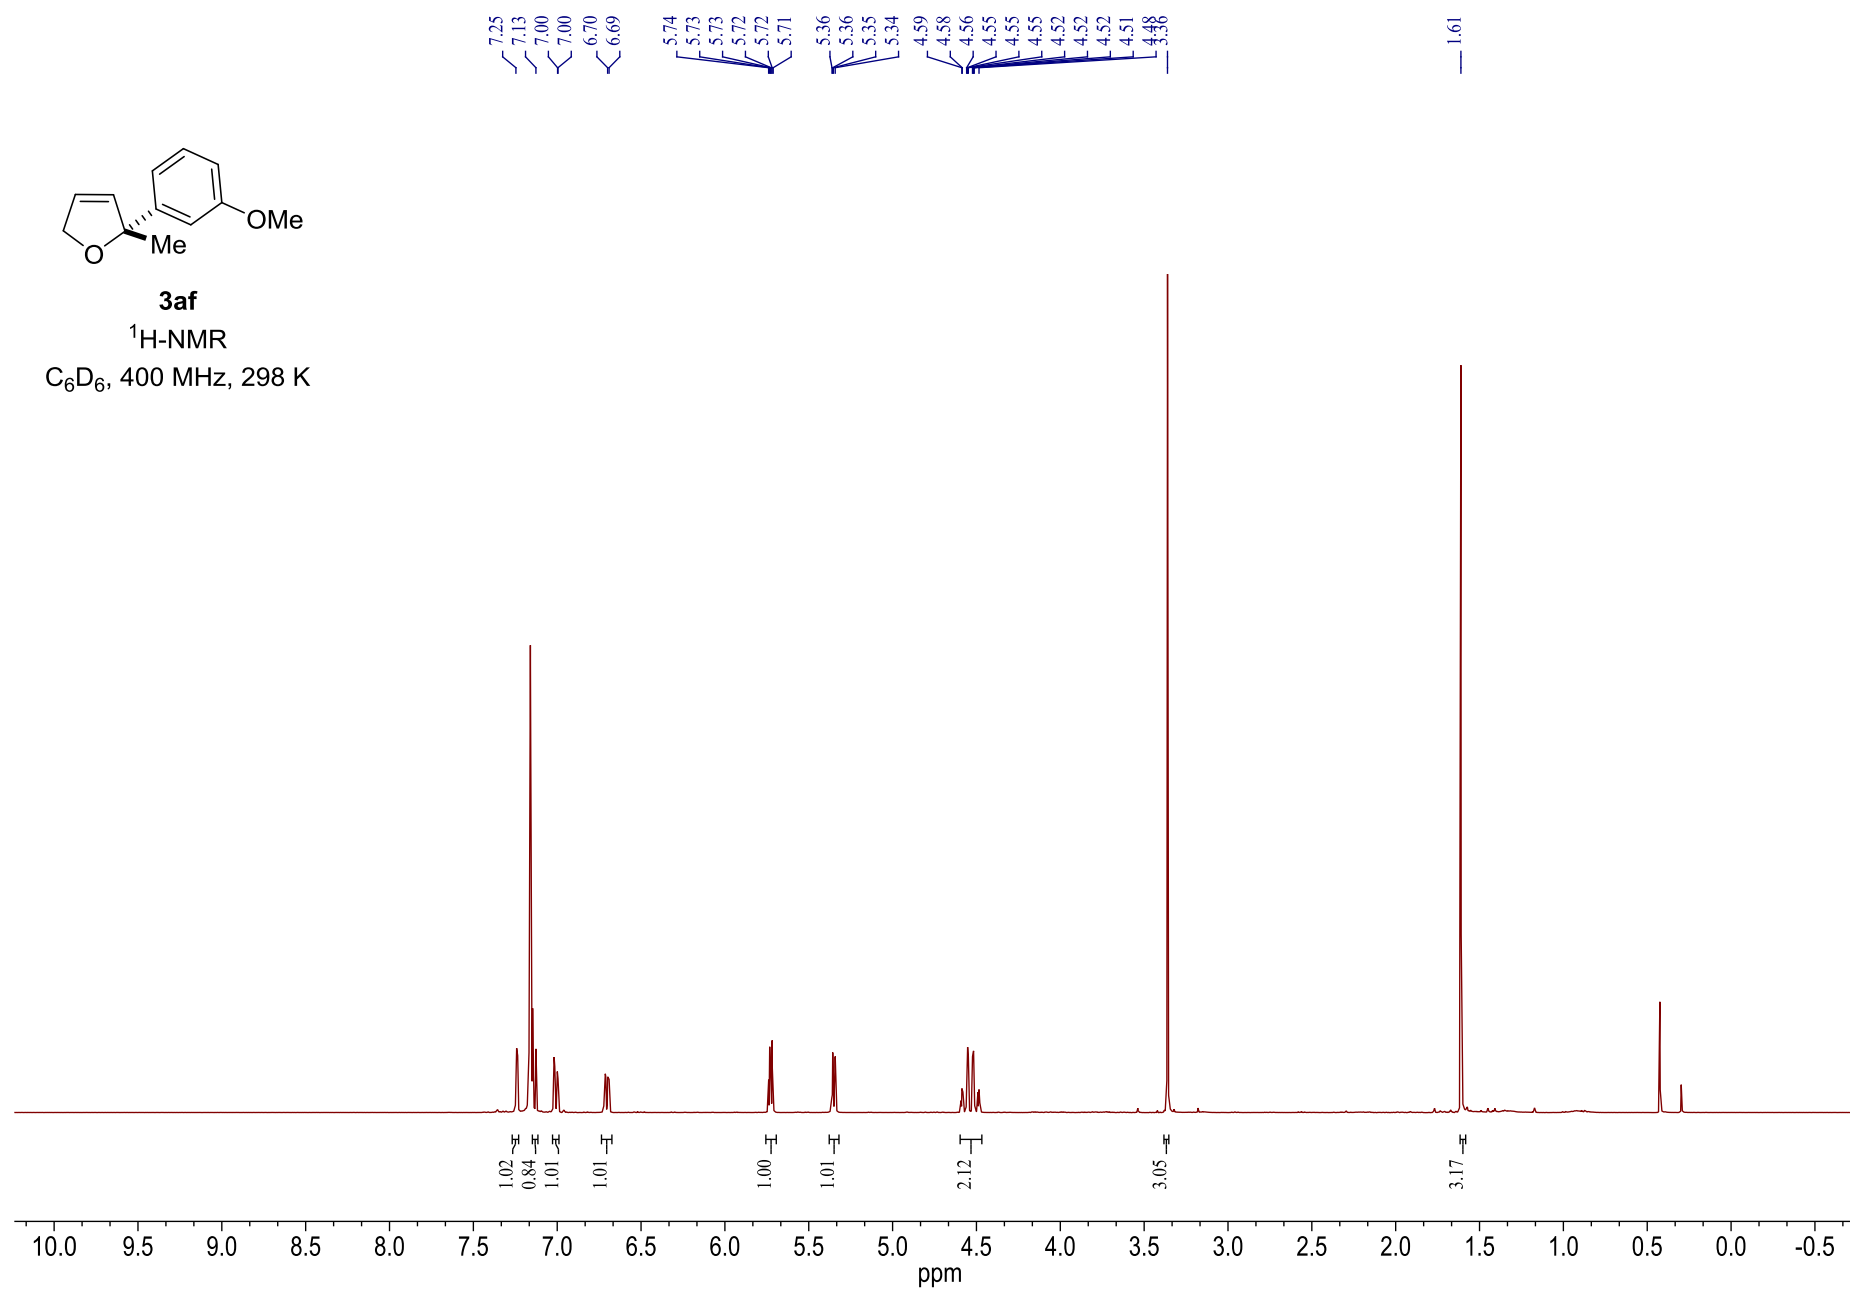



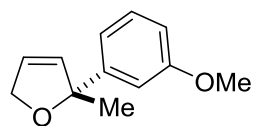**3af** $^{13}\text{C}\{^1\text{H}\}$ -NMR $\text{C}_6\text{D}_6$ , 100 MHz, 298 K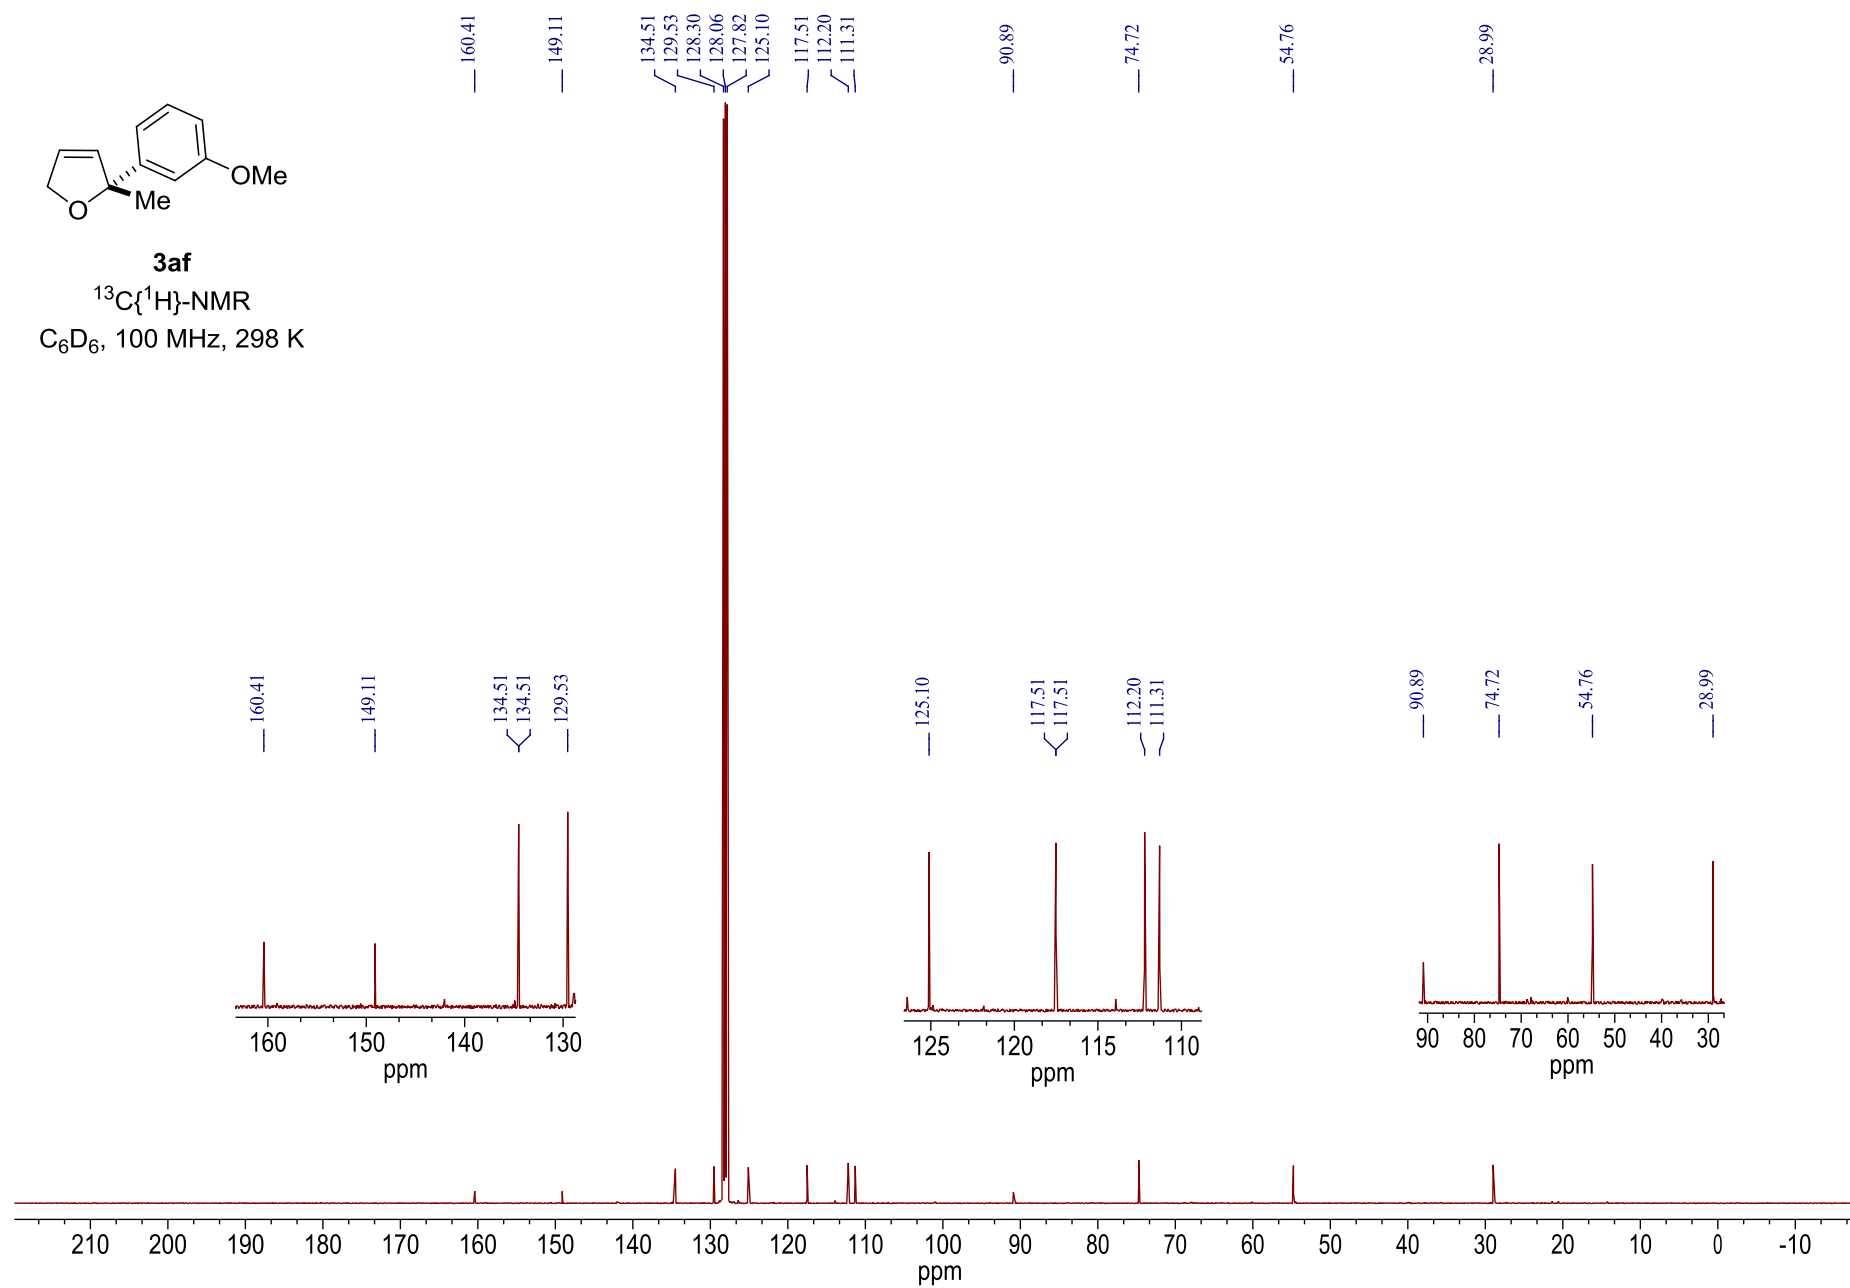

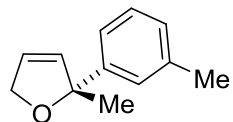**3ag**<sup>1</sup>H-NMRC<sub>6</sub>D<sub>6</sub>, 400 MHz, 298 K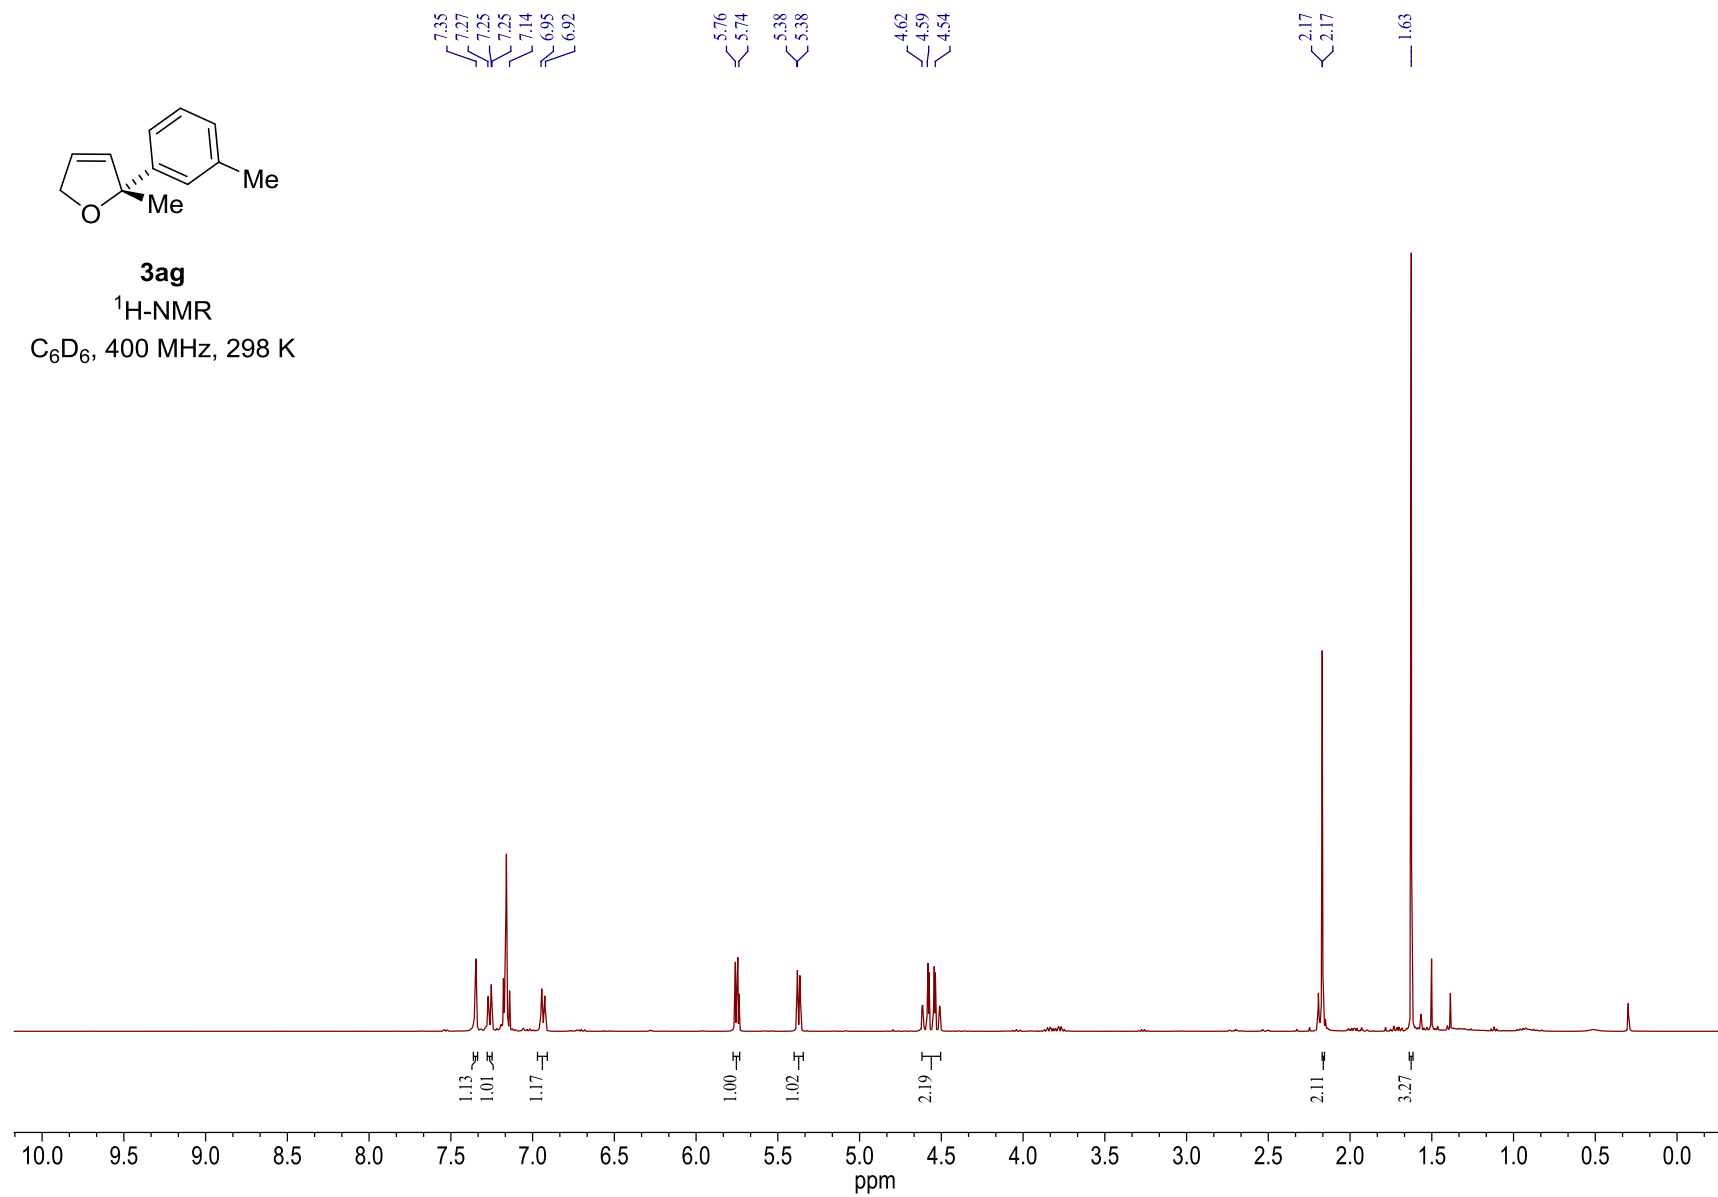

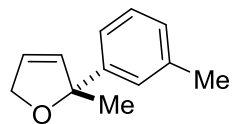**3ag** $^{13}\text{C}\{^1\text{H}\}$ -NMR $\text{C}_6\text{D}_6$ , 100 MHz, 298 K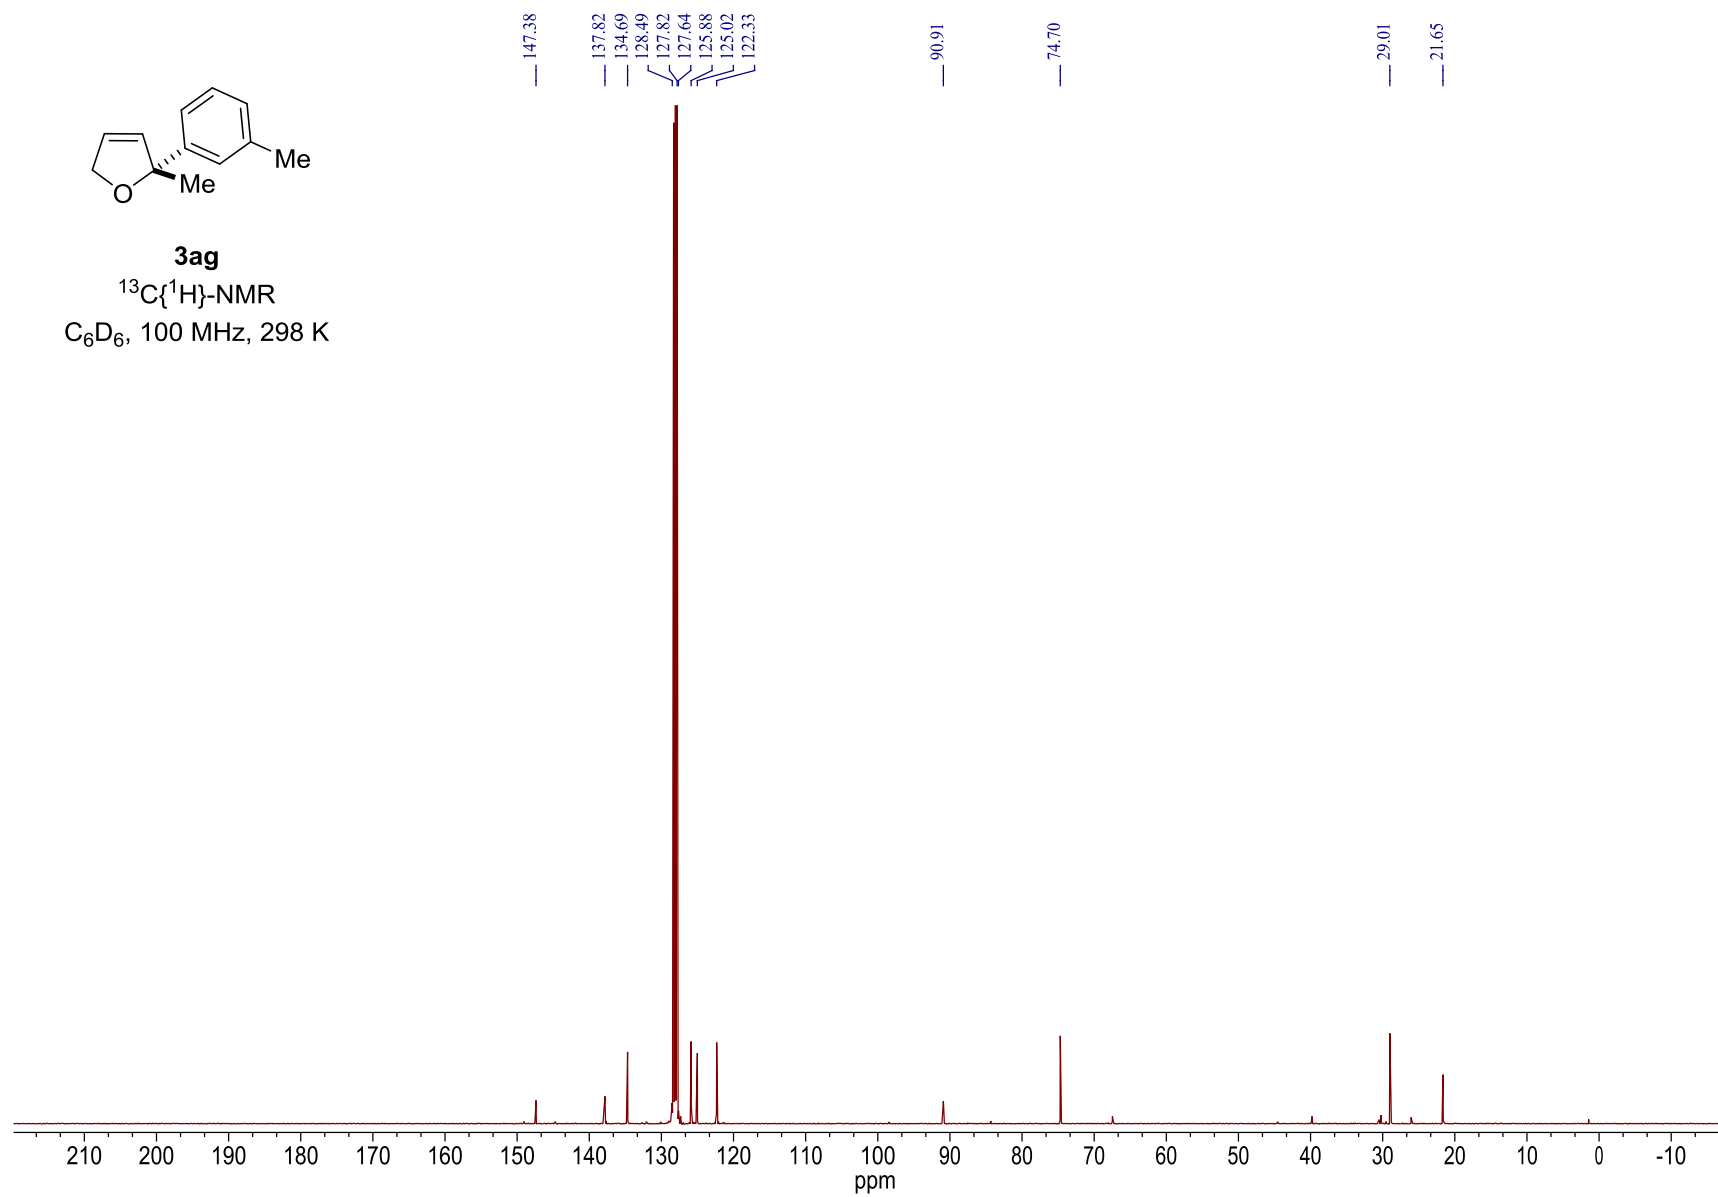

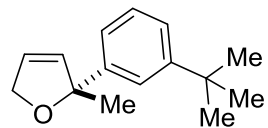**3ah**<sup>1</sup>H-NMRC<sub>6</sub>D<sub>6</sub>, 400 MHz, 298 K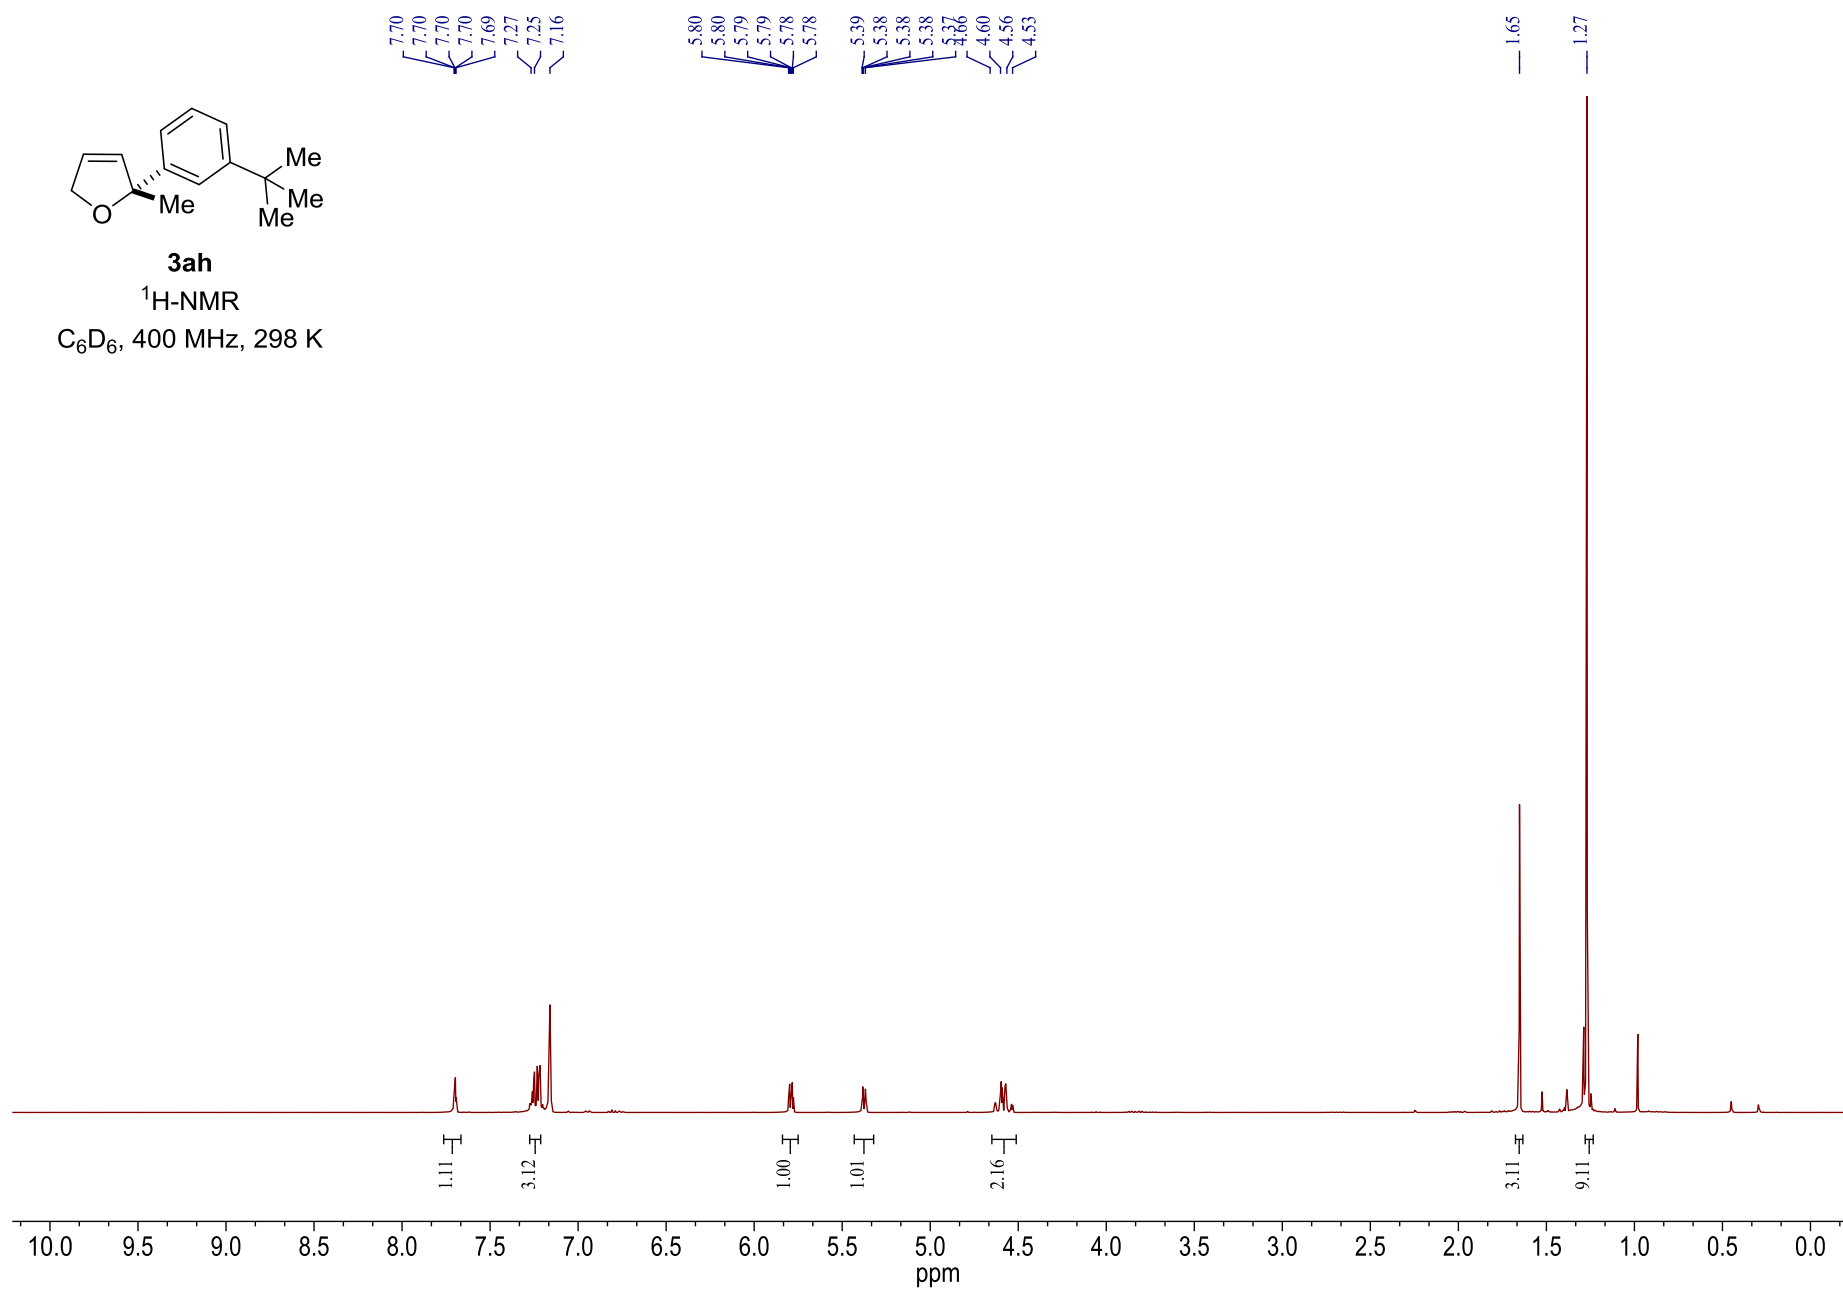

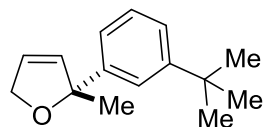**3ah** $^{13}\text{C}\{^1\text{H}\}$ -NMR $\text{C}_6\text{D}_6$ , 100 MHz, 298 K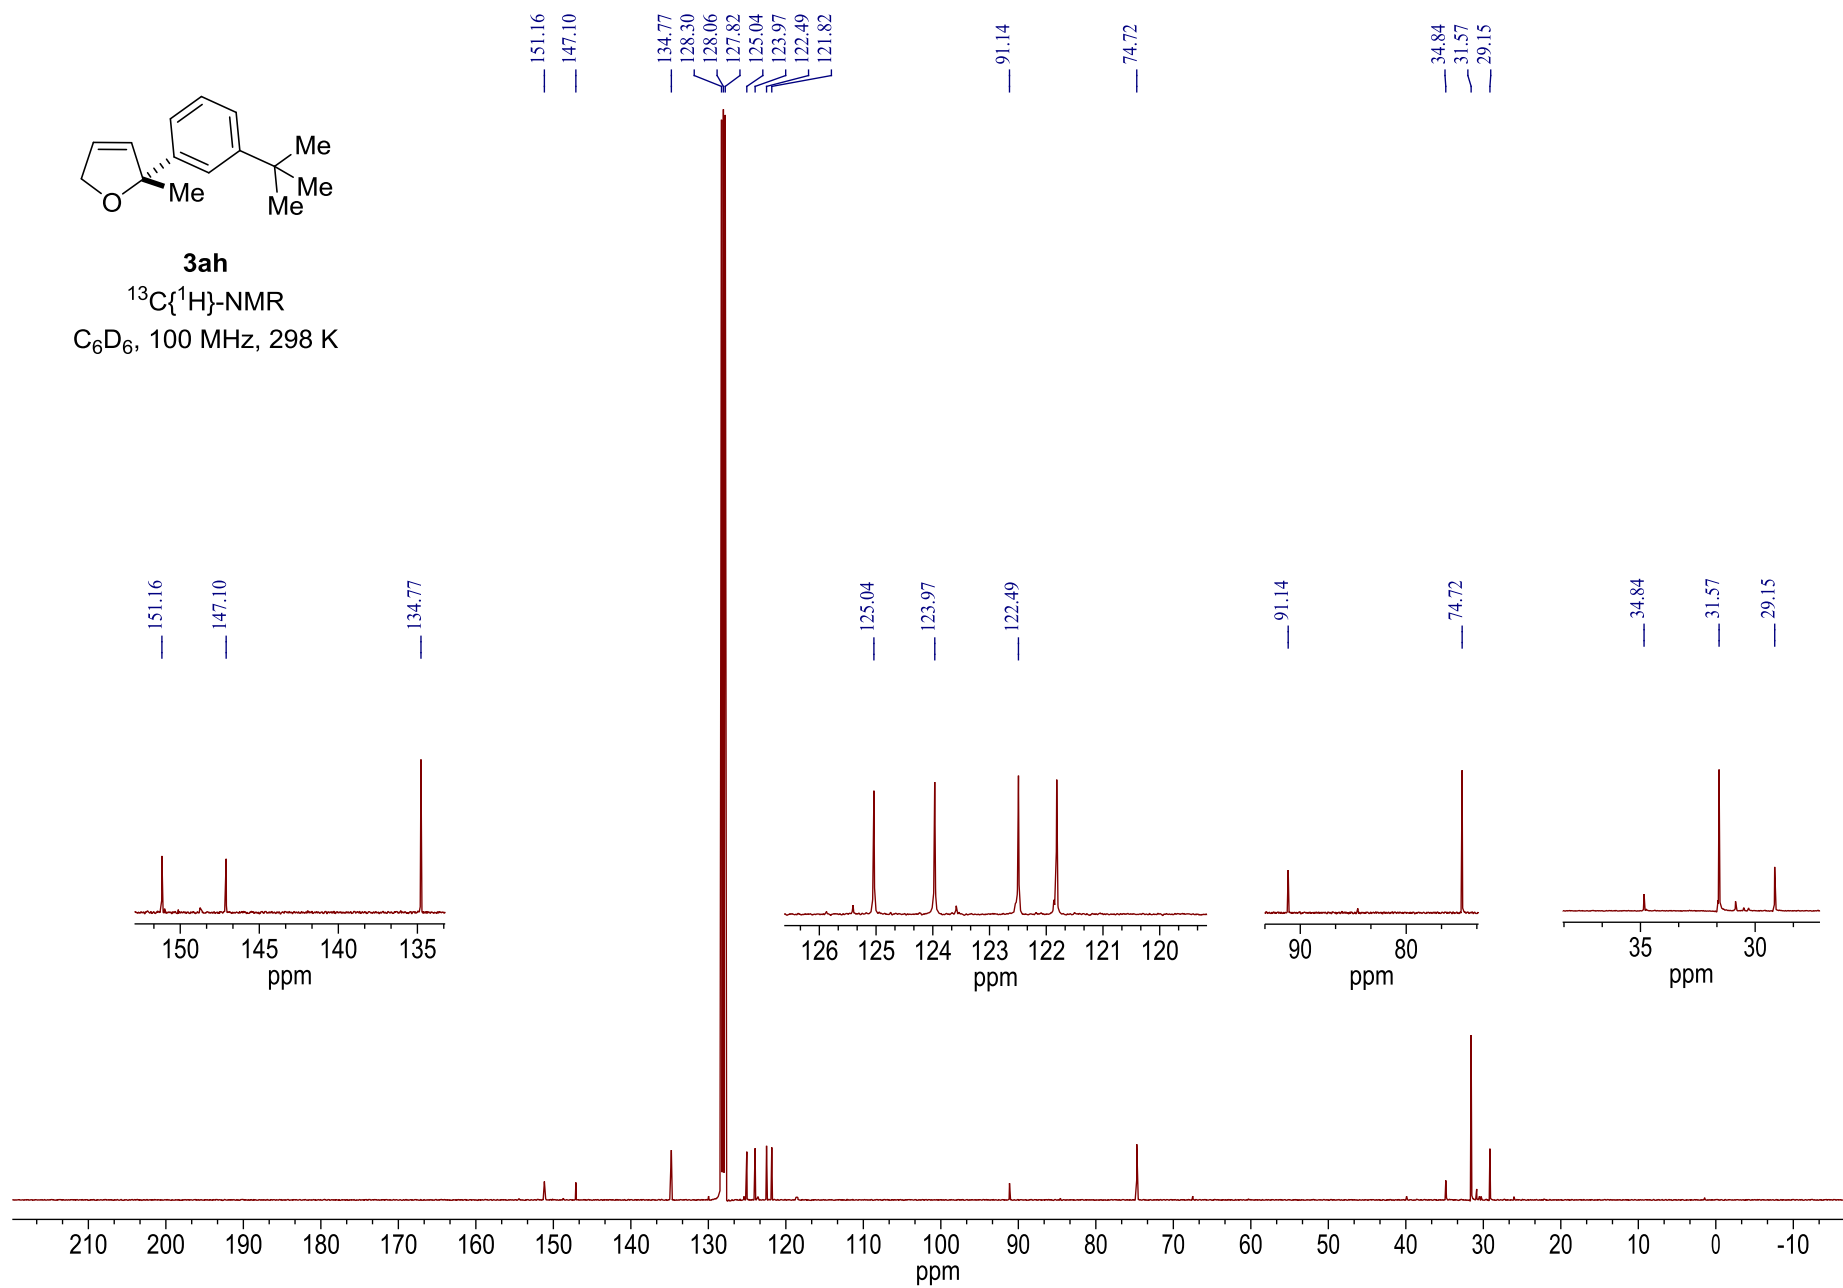

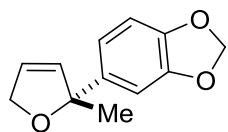**3ai**<sup>1</sup>H-NMRC<sub>6</sub>D<sub>6</sub>, 400 MHz, 298 K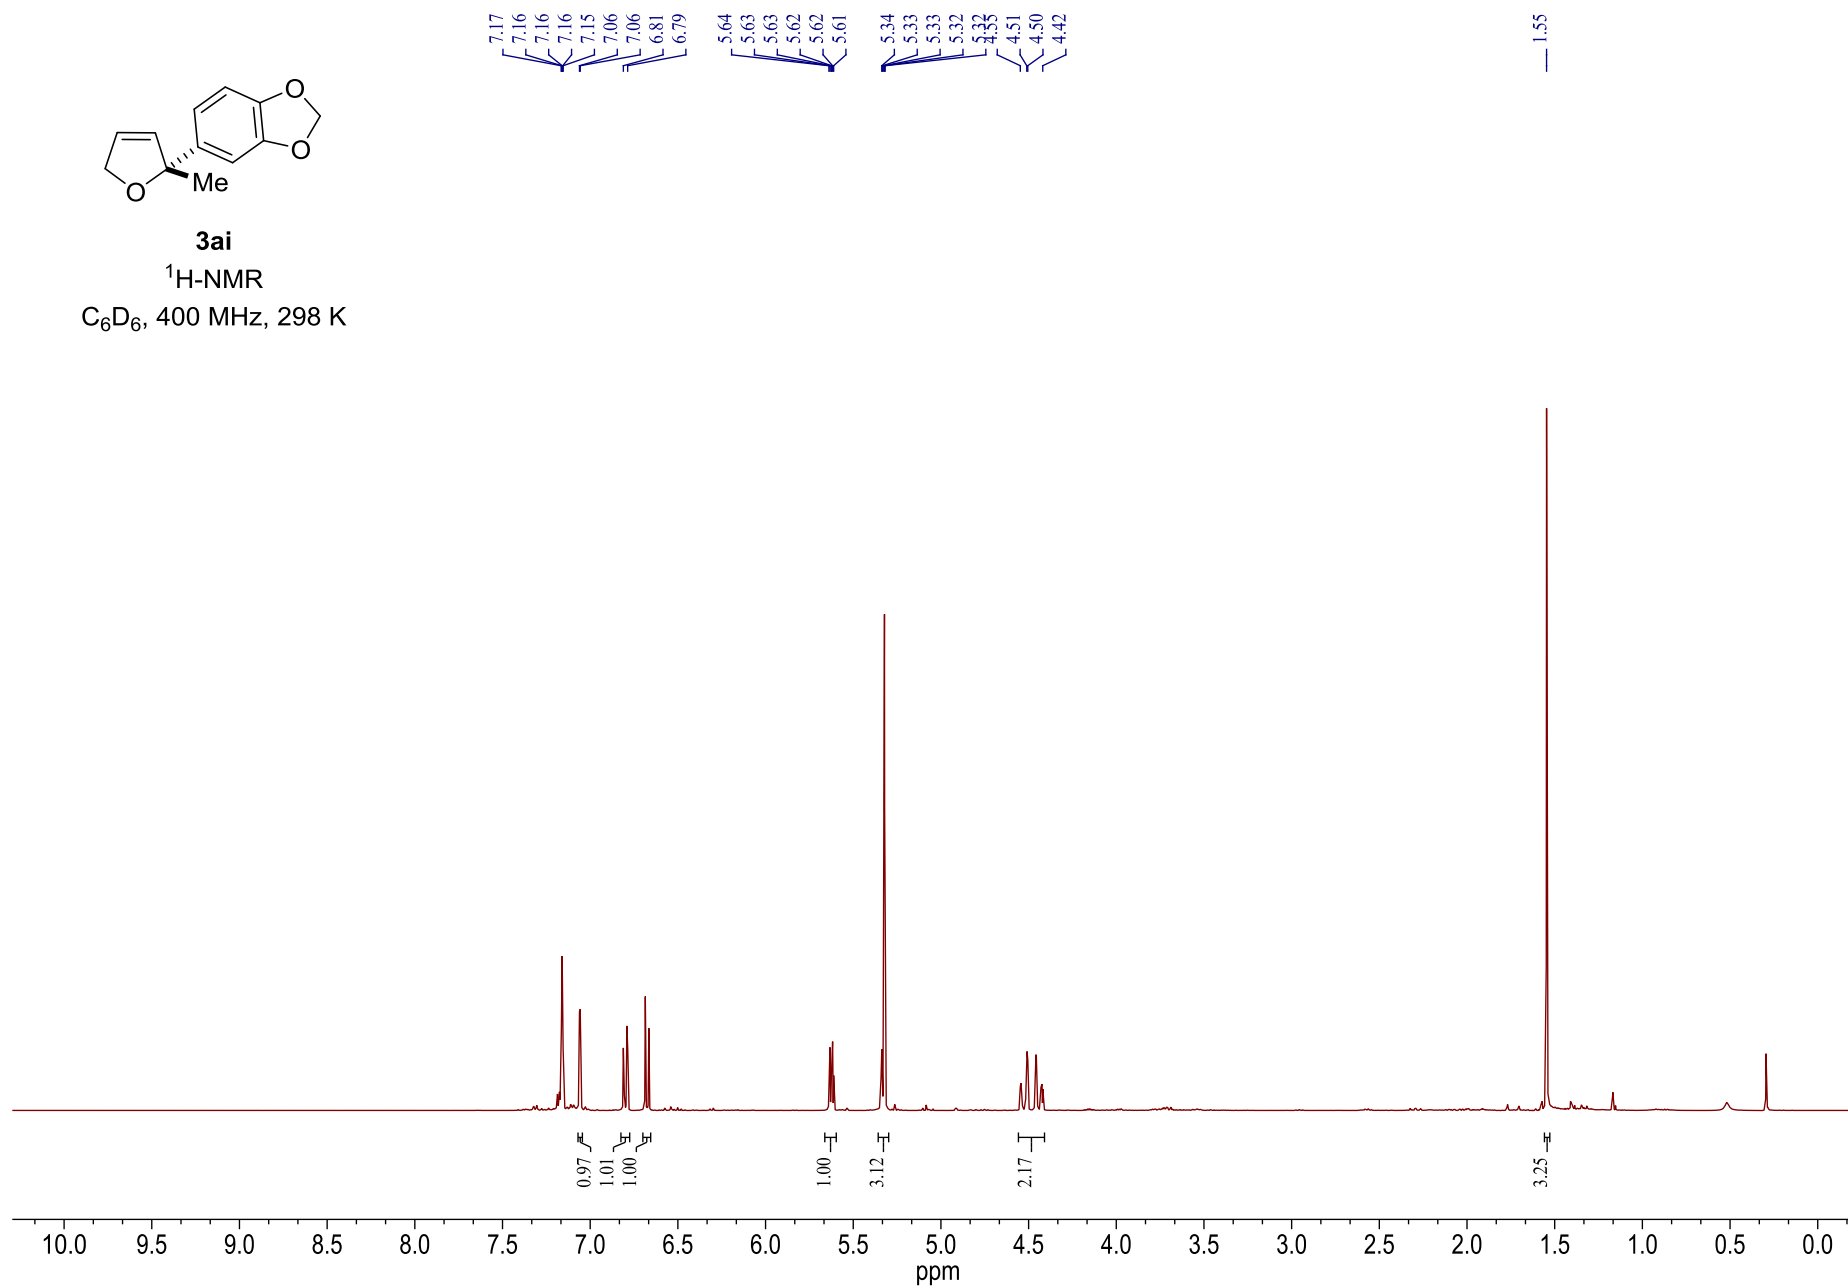

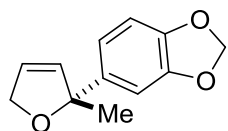**3ai**

$^{13}\text{C}\{^1\text{H}\}$ -NMR  
 $\text{C}_6\text{D}_6$ , 100 MHz, 298 K

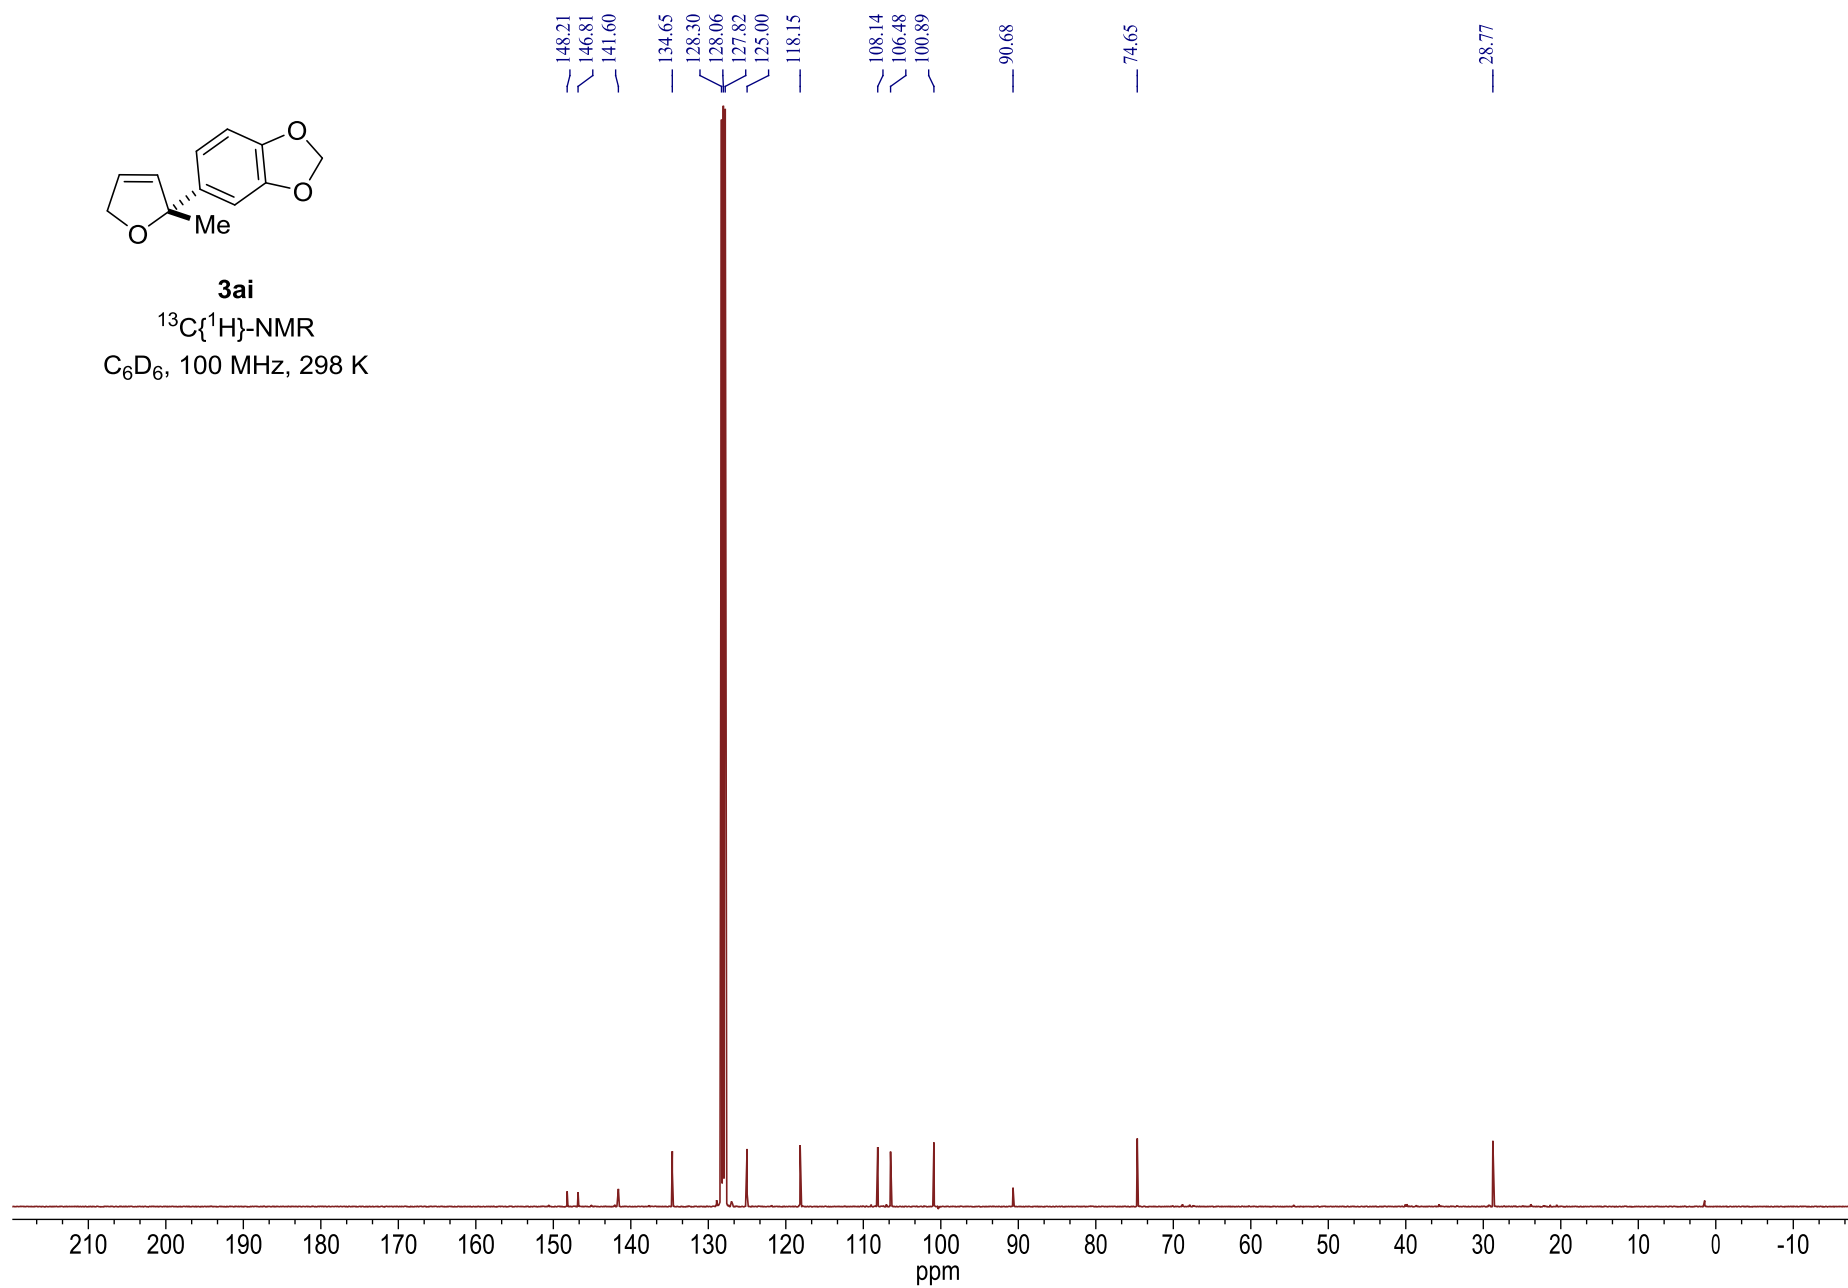

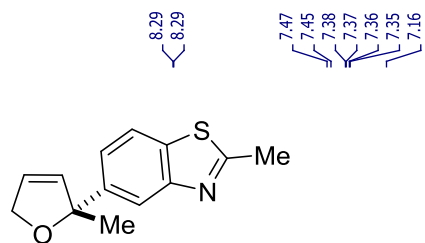**3aj**<sup>1</sup>H-NMRC<sub>6</sub>D<sub>6</sub>, 400 MHz, 298 K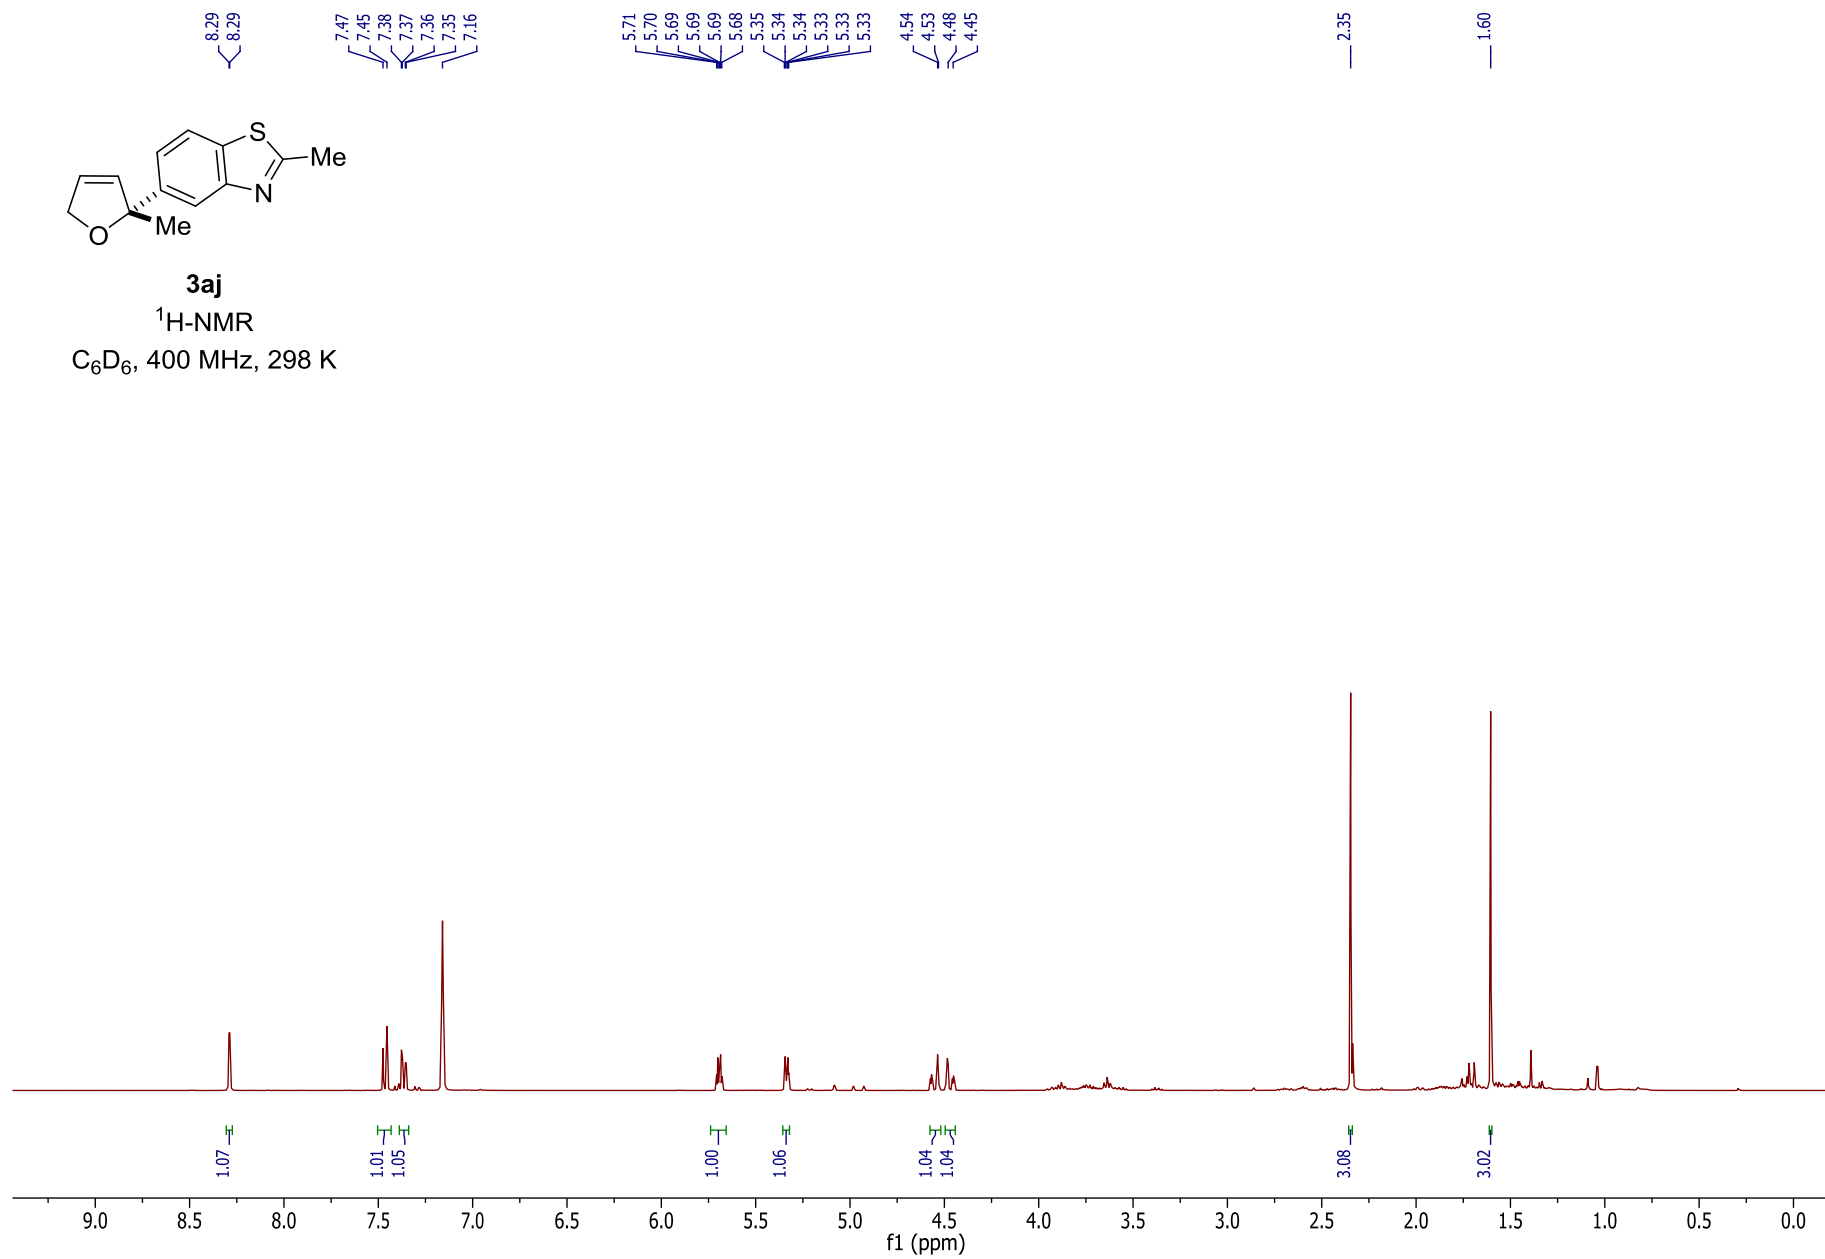



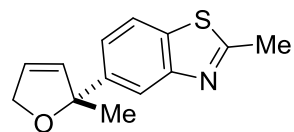**3aj**

$^{13}\text{C}\{^1\text{H}\}$ -NMR  
 $\text{C}_6\text{D}_6$ , 100 MHz, 298 K

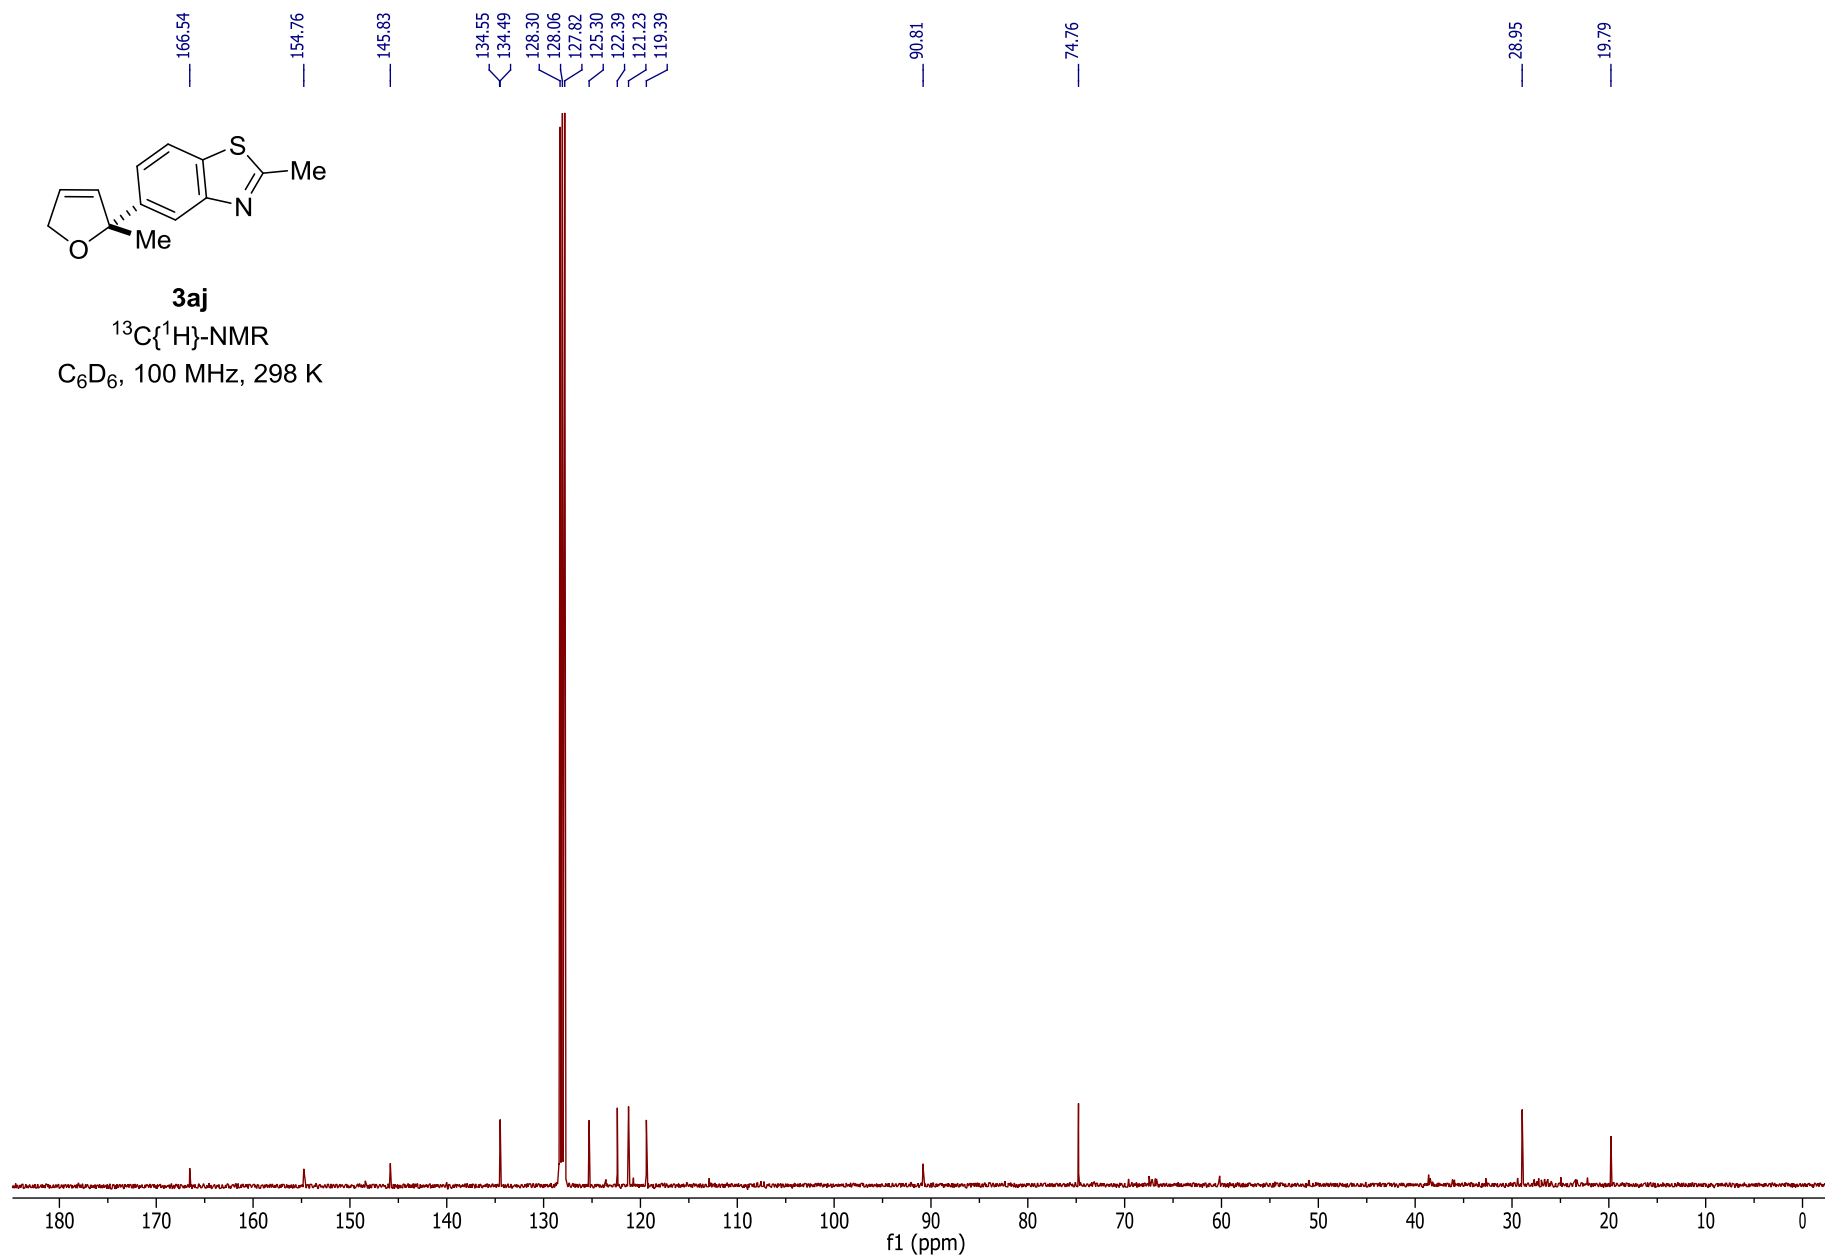

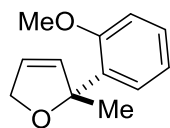**3ak**<sup>1</sup>H-NMRC<sub>6</sub>D<sub>6</sub>, 500 MHz, 298 K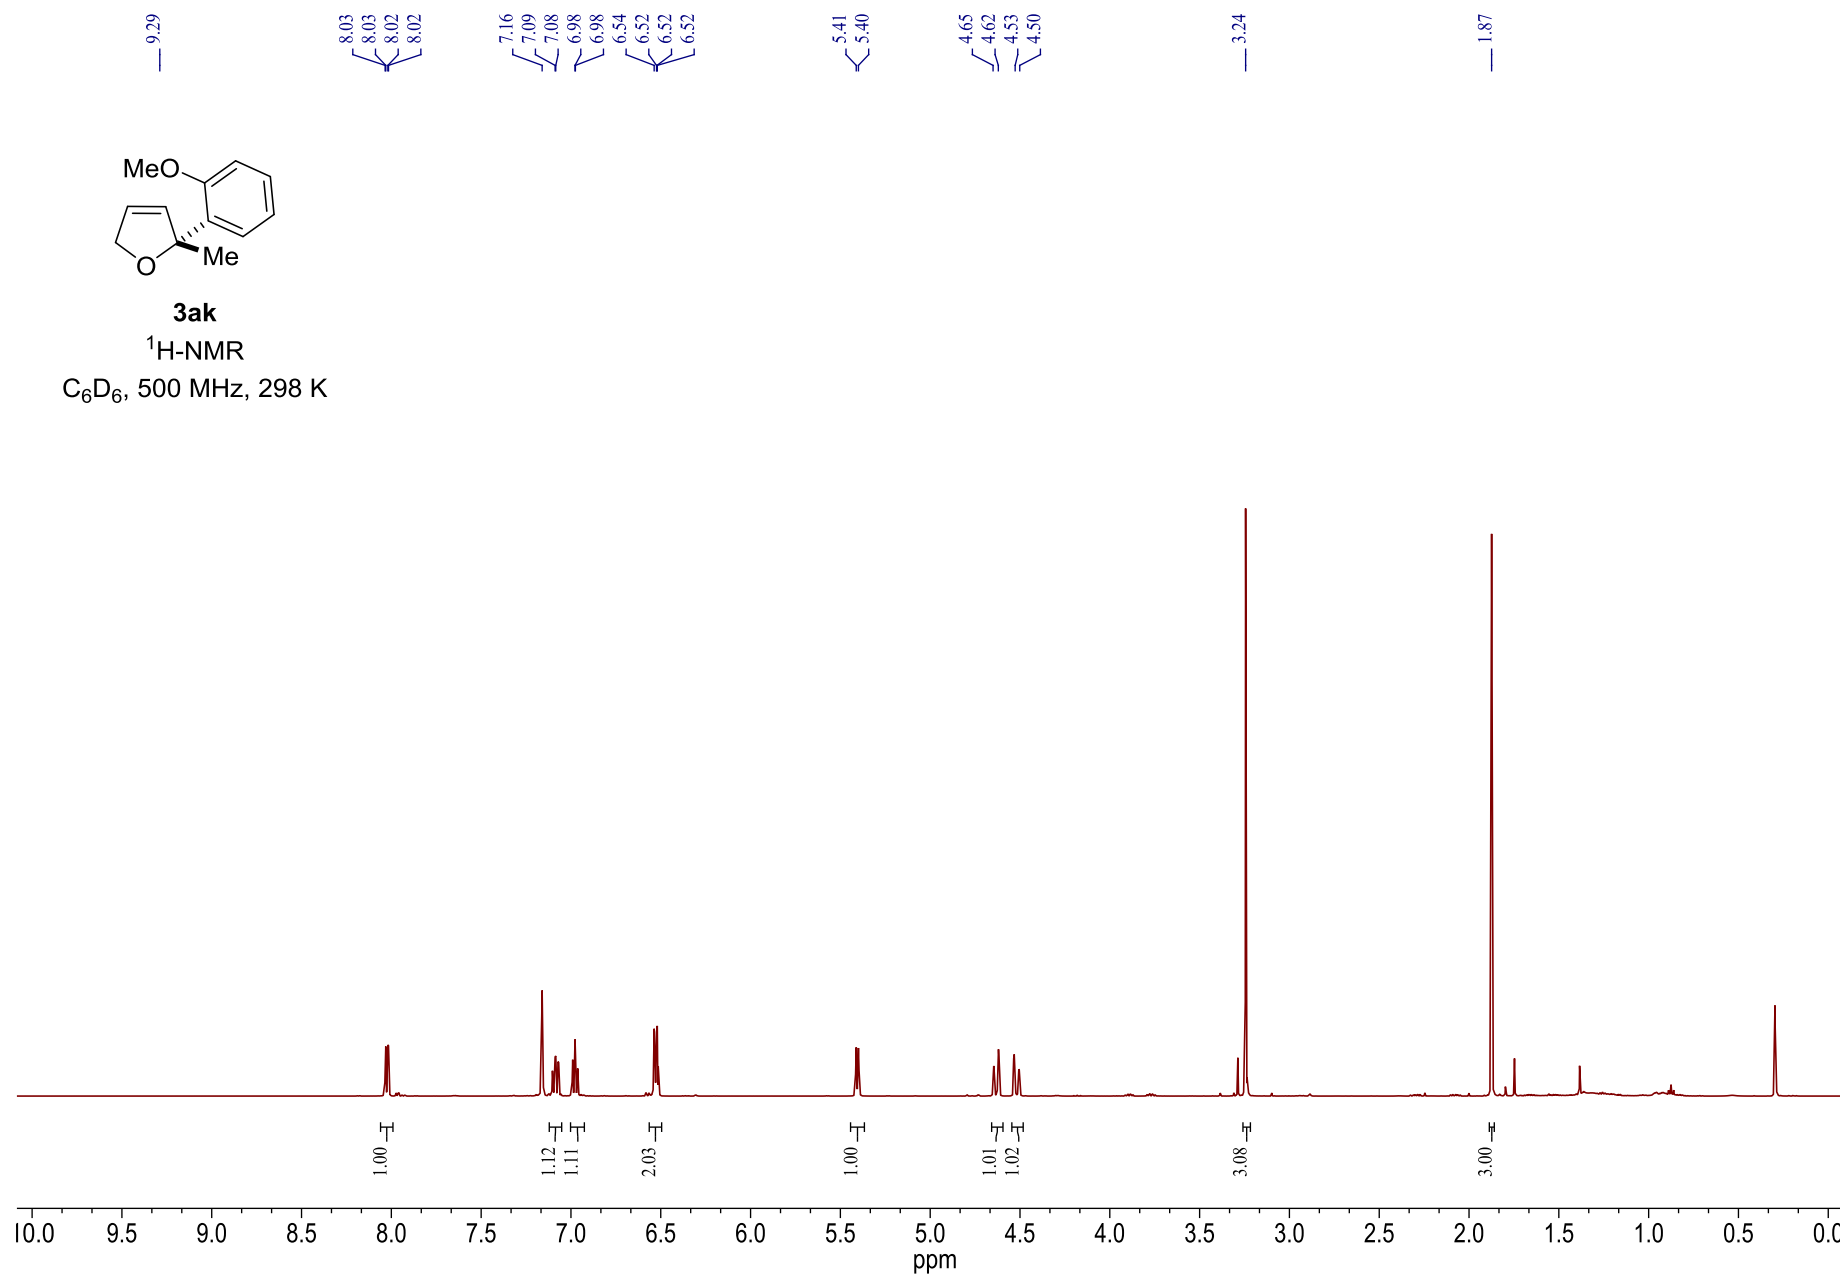

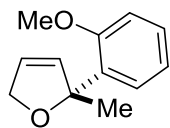**3ak** $\{^{13}\text{C}\}^1\text{H-NMR}$  $\text{C}_6\text{D}_6$ , 125 MHz, 298 K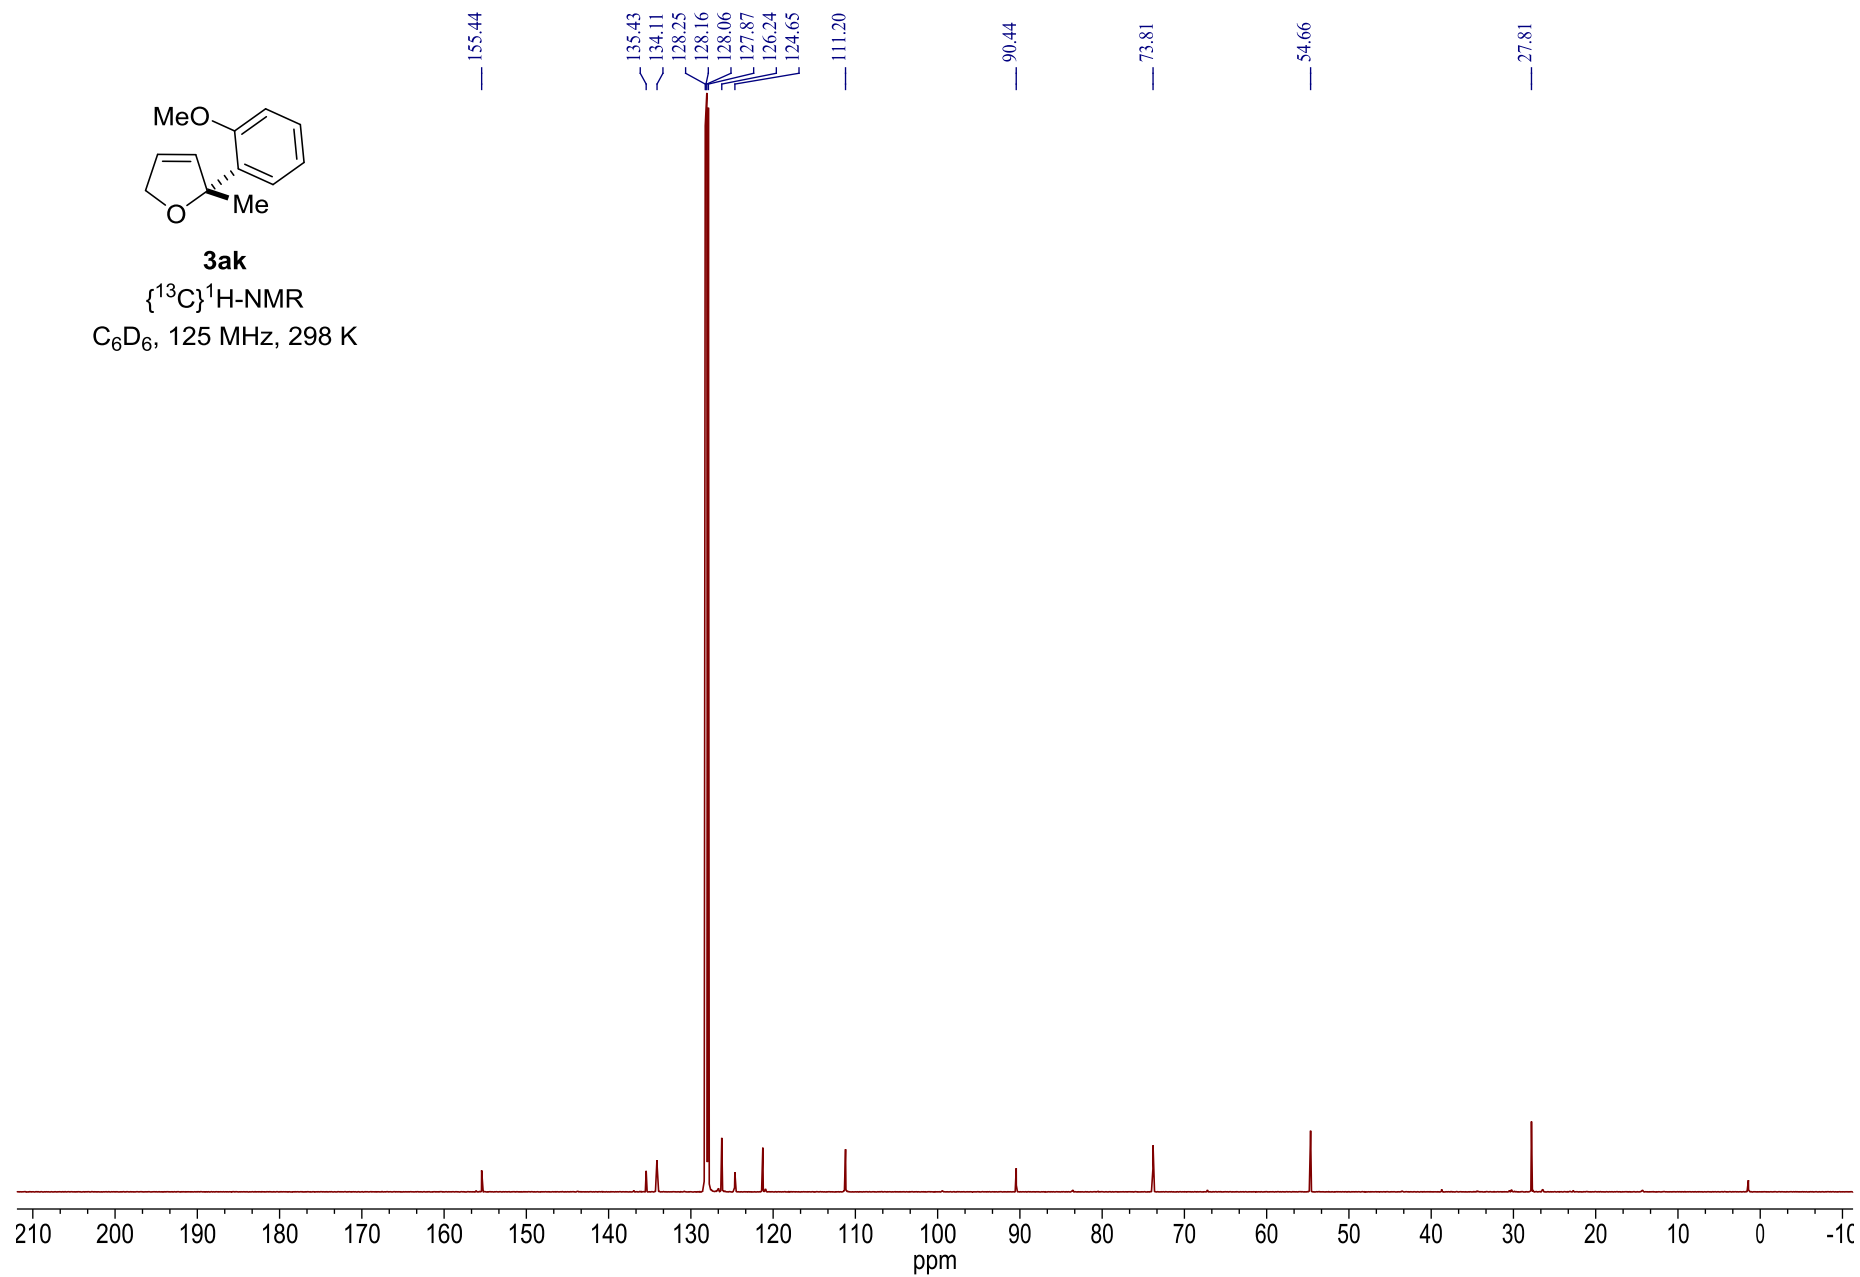

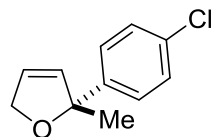**3al**<sup>1</sup>H-NMRC<sub>6</sub>D<sub>6</sub>, 400 MHz, 298 K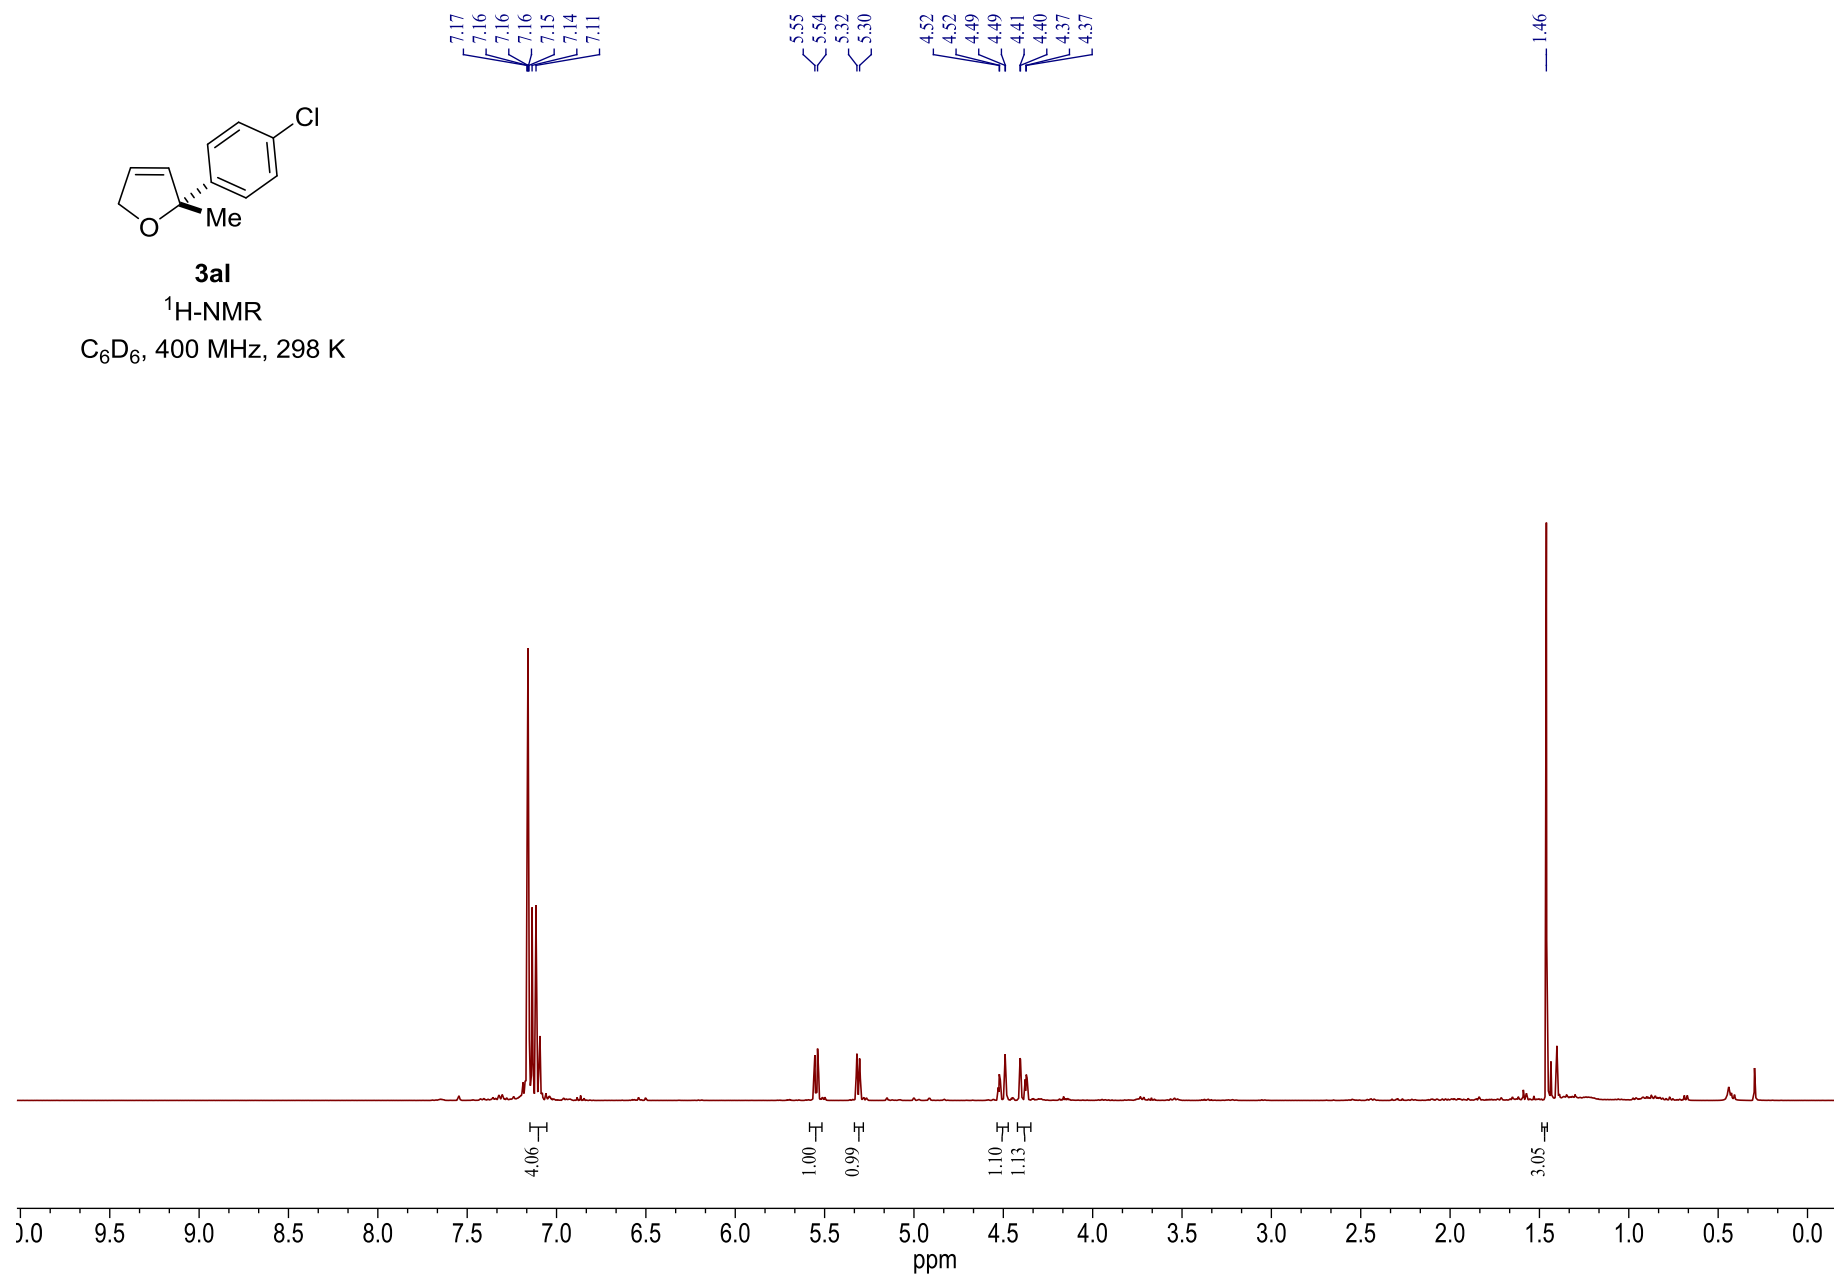

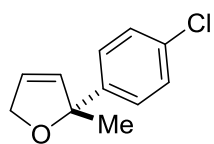**3al**

$^{13}\text{C}\{^1\text{H}\}$ -NMR  
 $\text{C}_6\text{D}_6$ , 100 MHz, 298 K

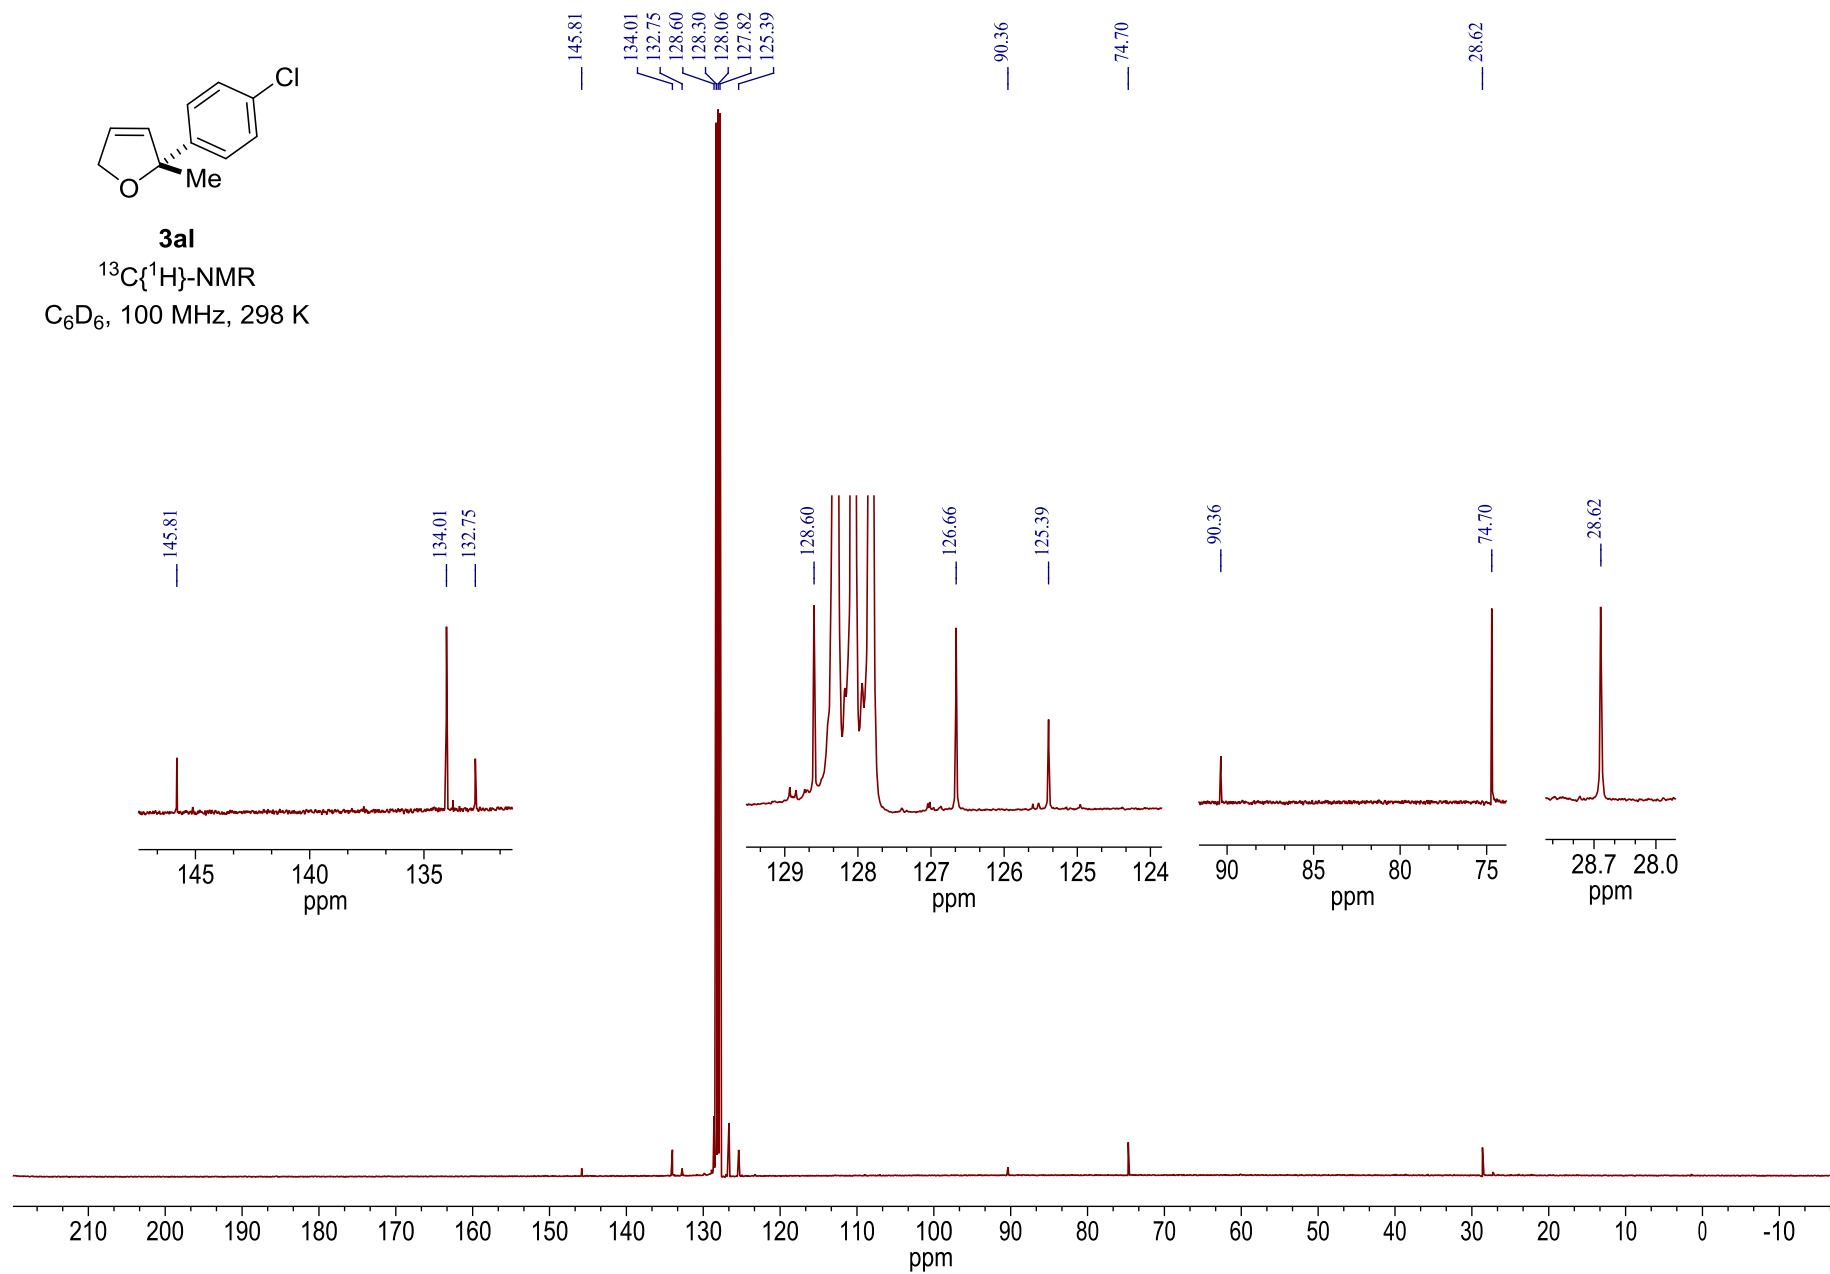

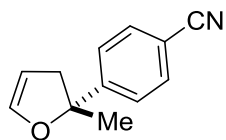**4ac** $^1\text{H-NMR}$  $\text{C}_6\text{D}_6$ , 400 MHz, 298 K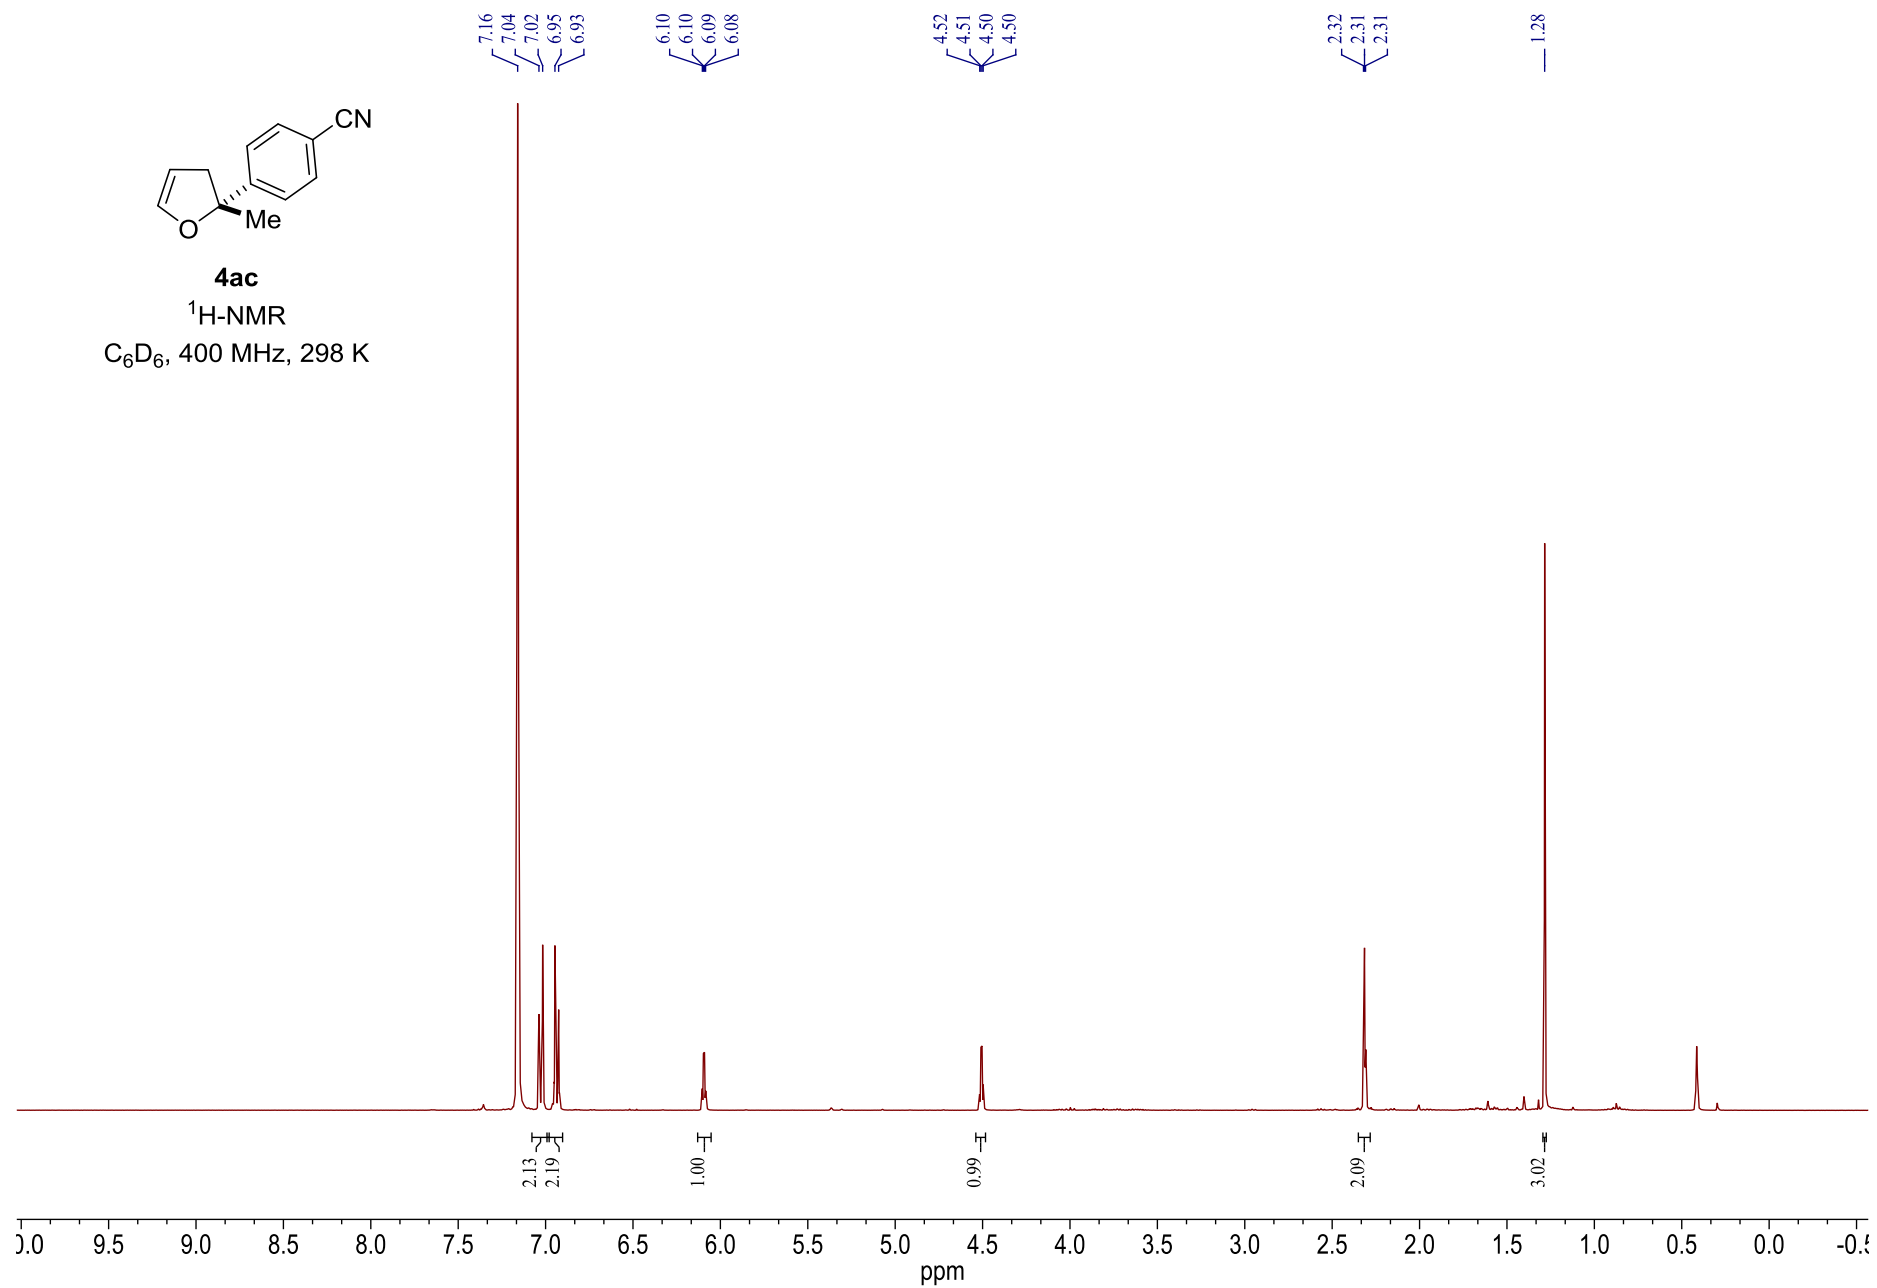

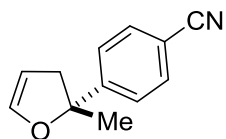**4ac**

$^{13}\text{C}\{^1\text{H}\}$ -NMR  
 $\text{C}_6\text{D}_6$ , 100 MHz, 298 K

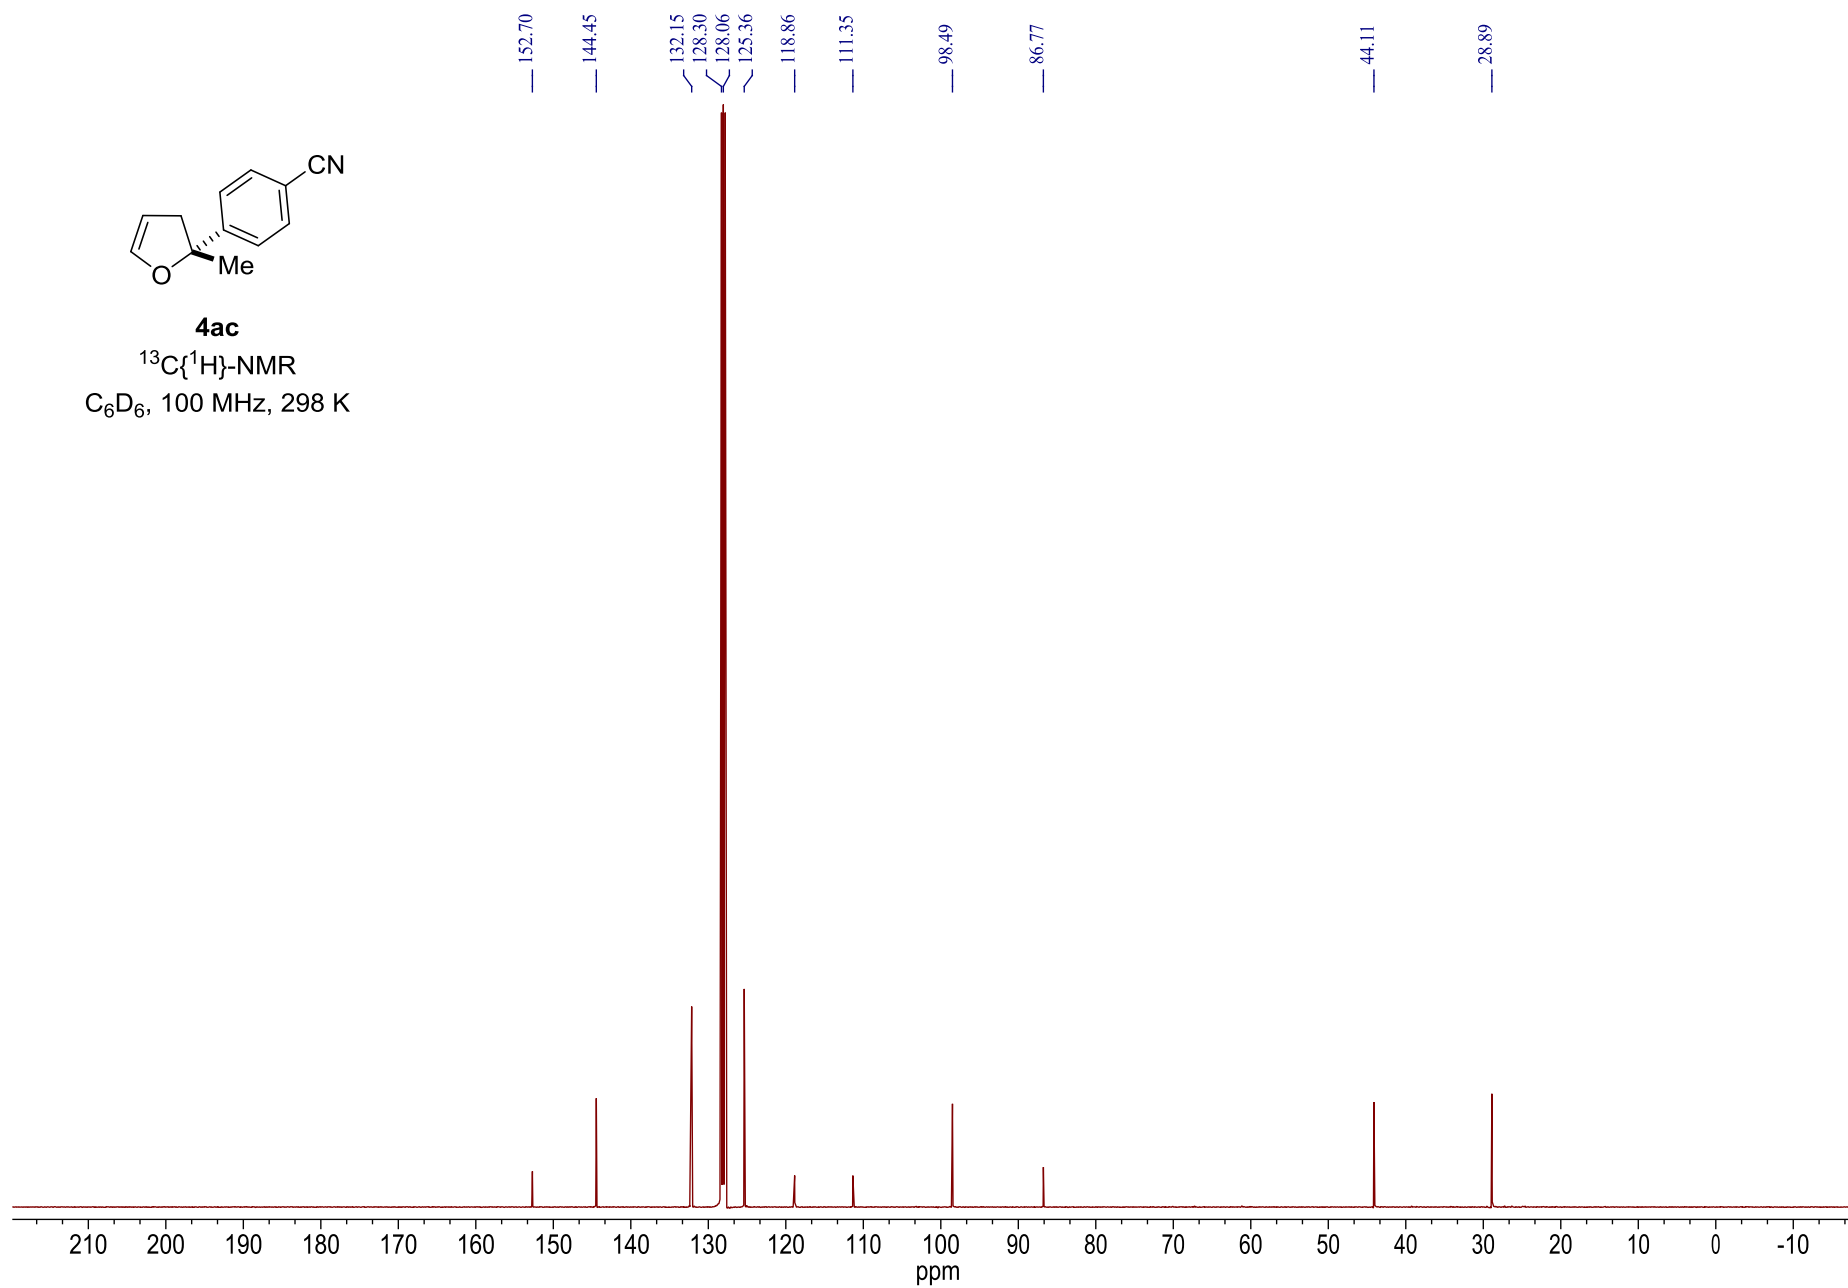

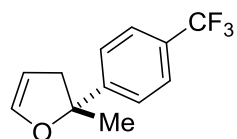**4am**<sup>1</sup>H-NMRC<sub>6</sub>D<sub>6</sub>, 400 MHz, 298 K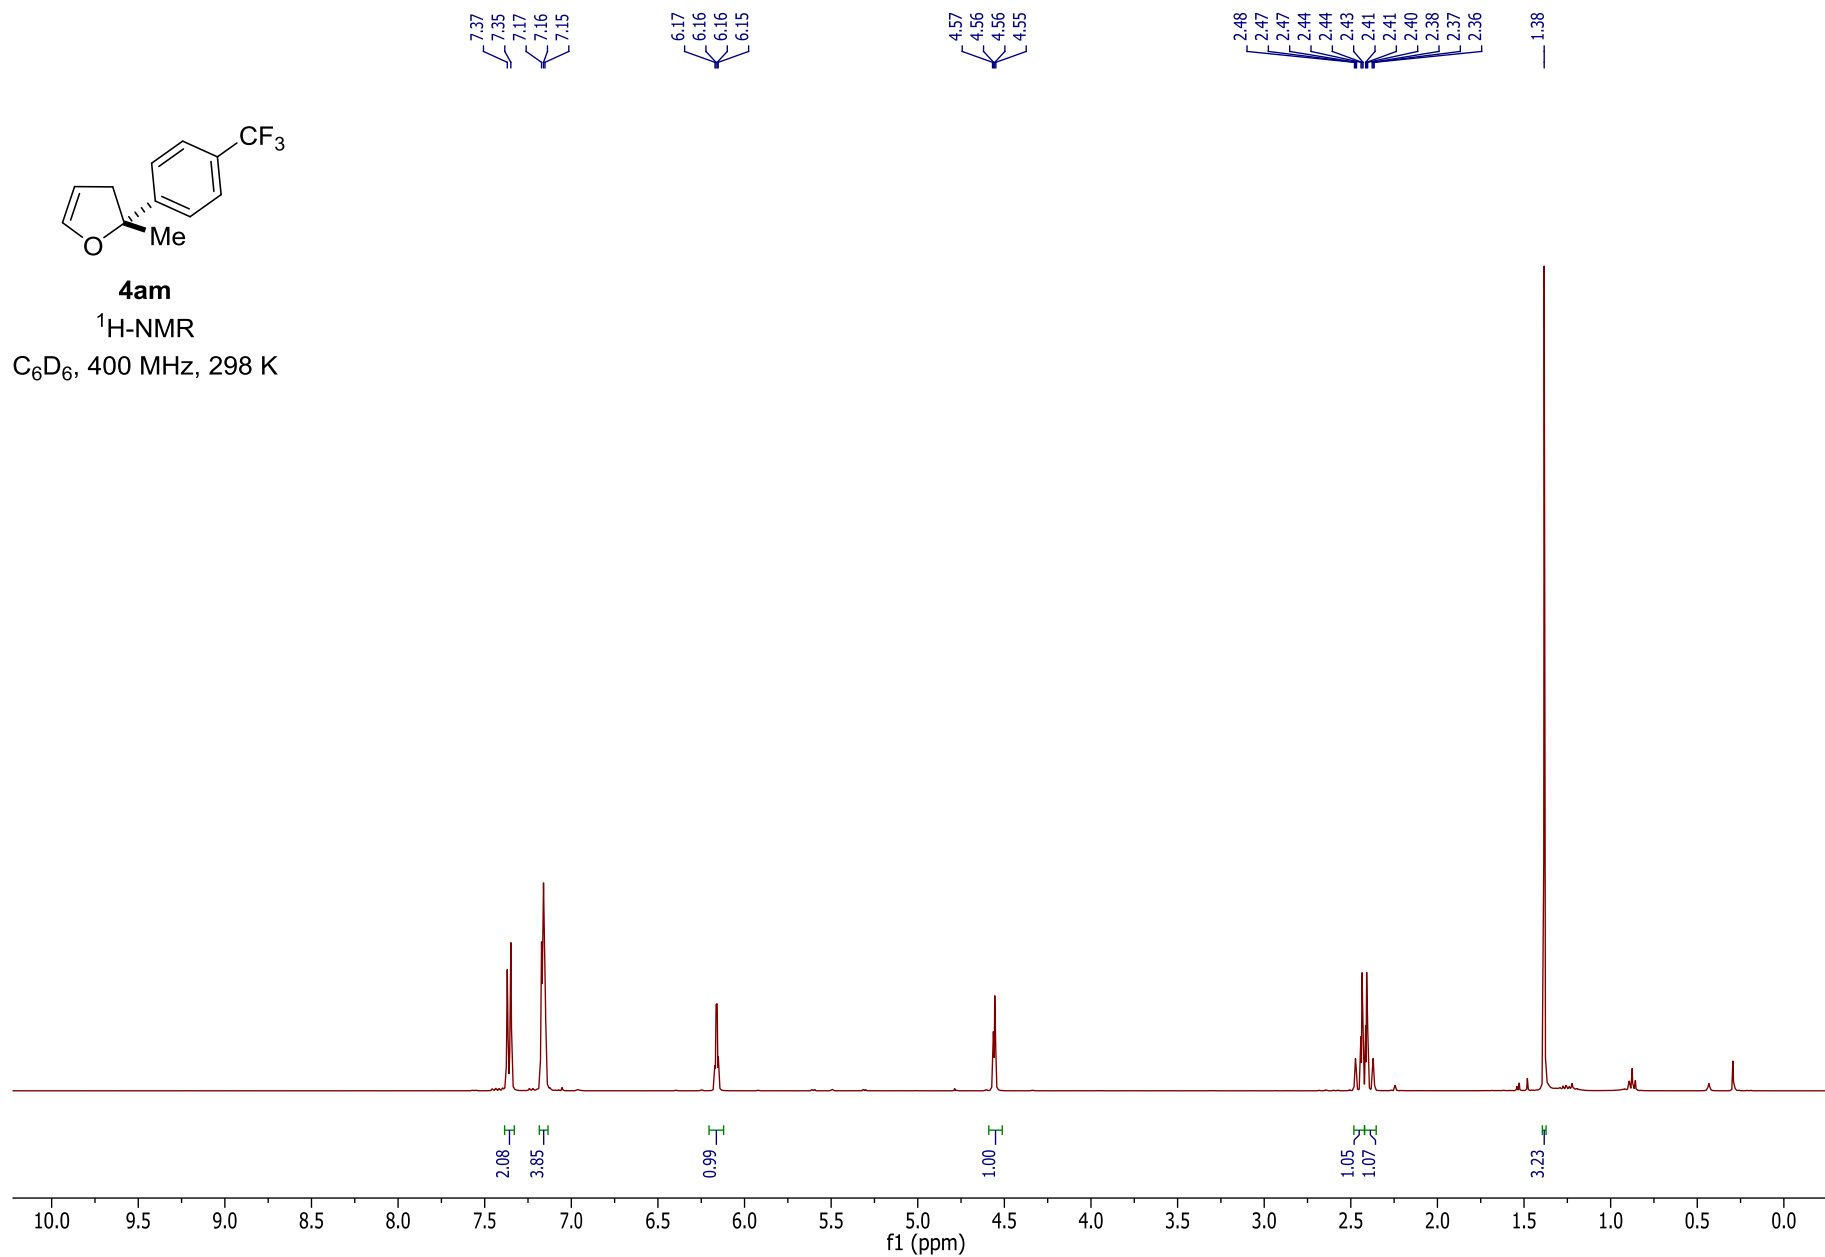



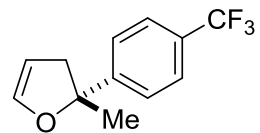**4am**<sup>19</sup>F-NMRC<sub>6</sub>D<sub>6</sub>, 282 MHz, 298 K

-61.22

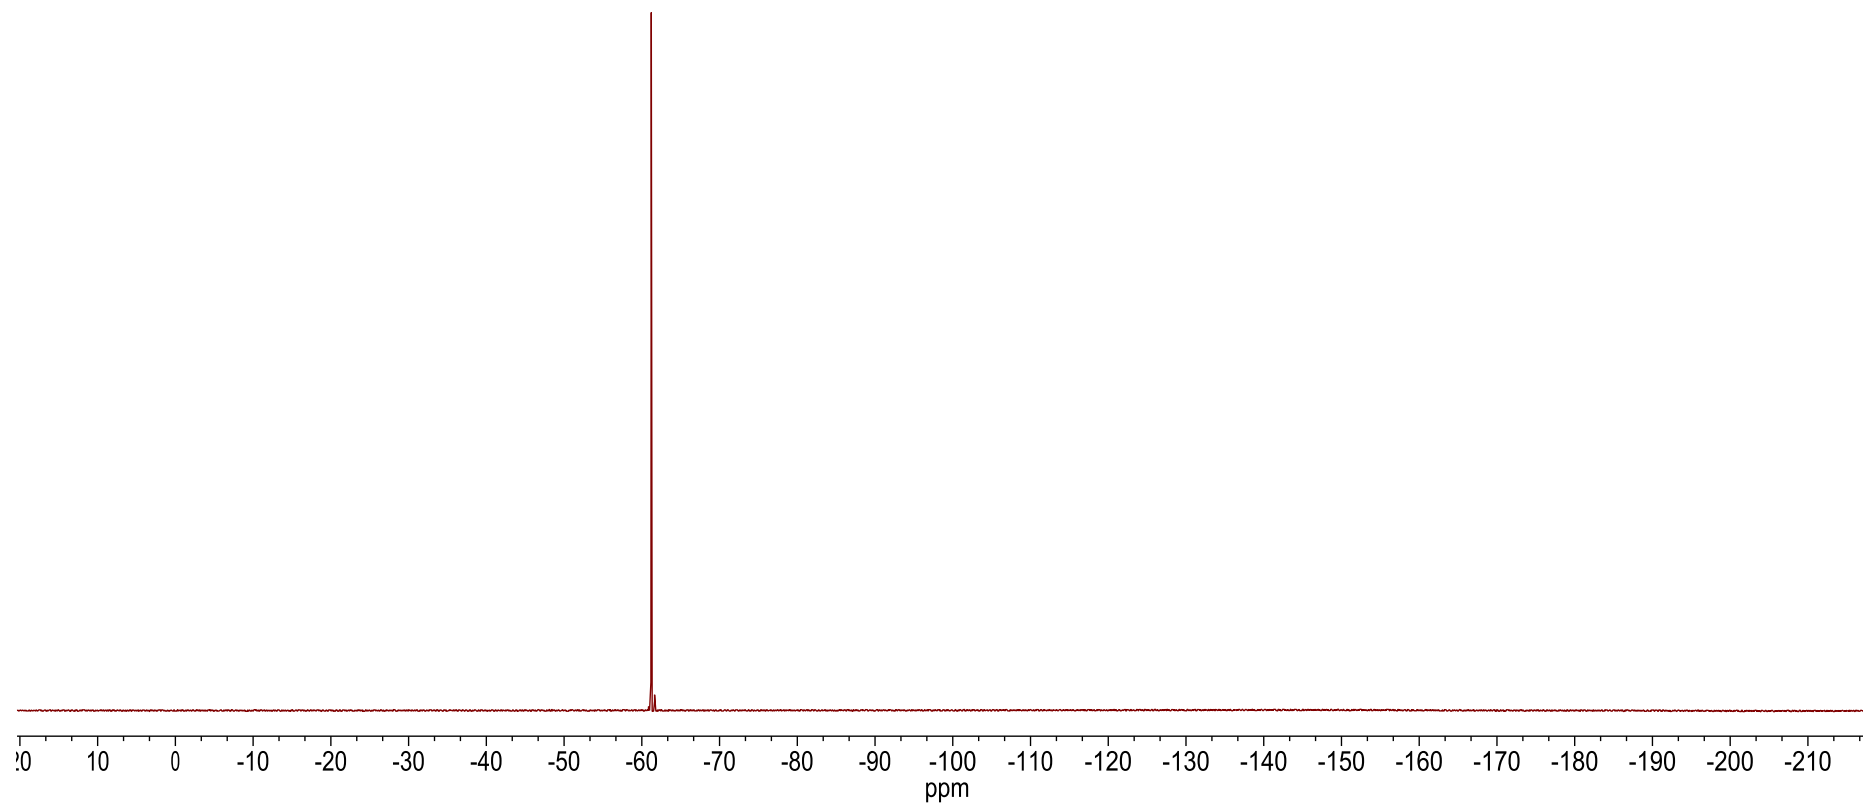

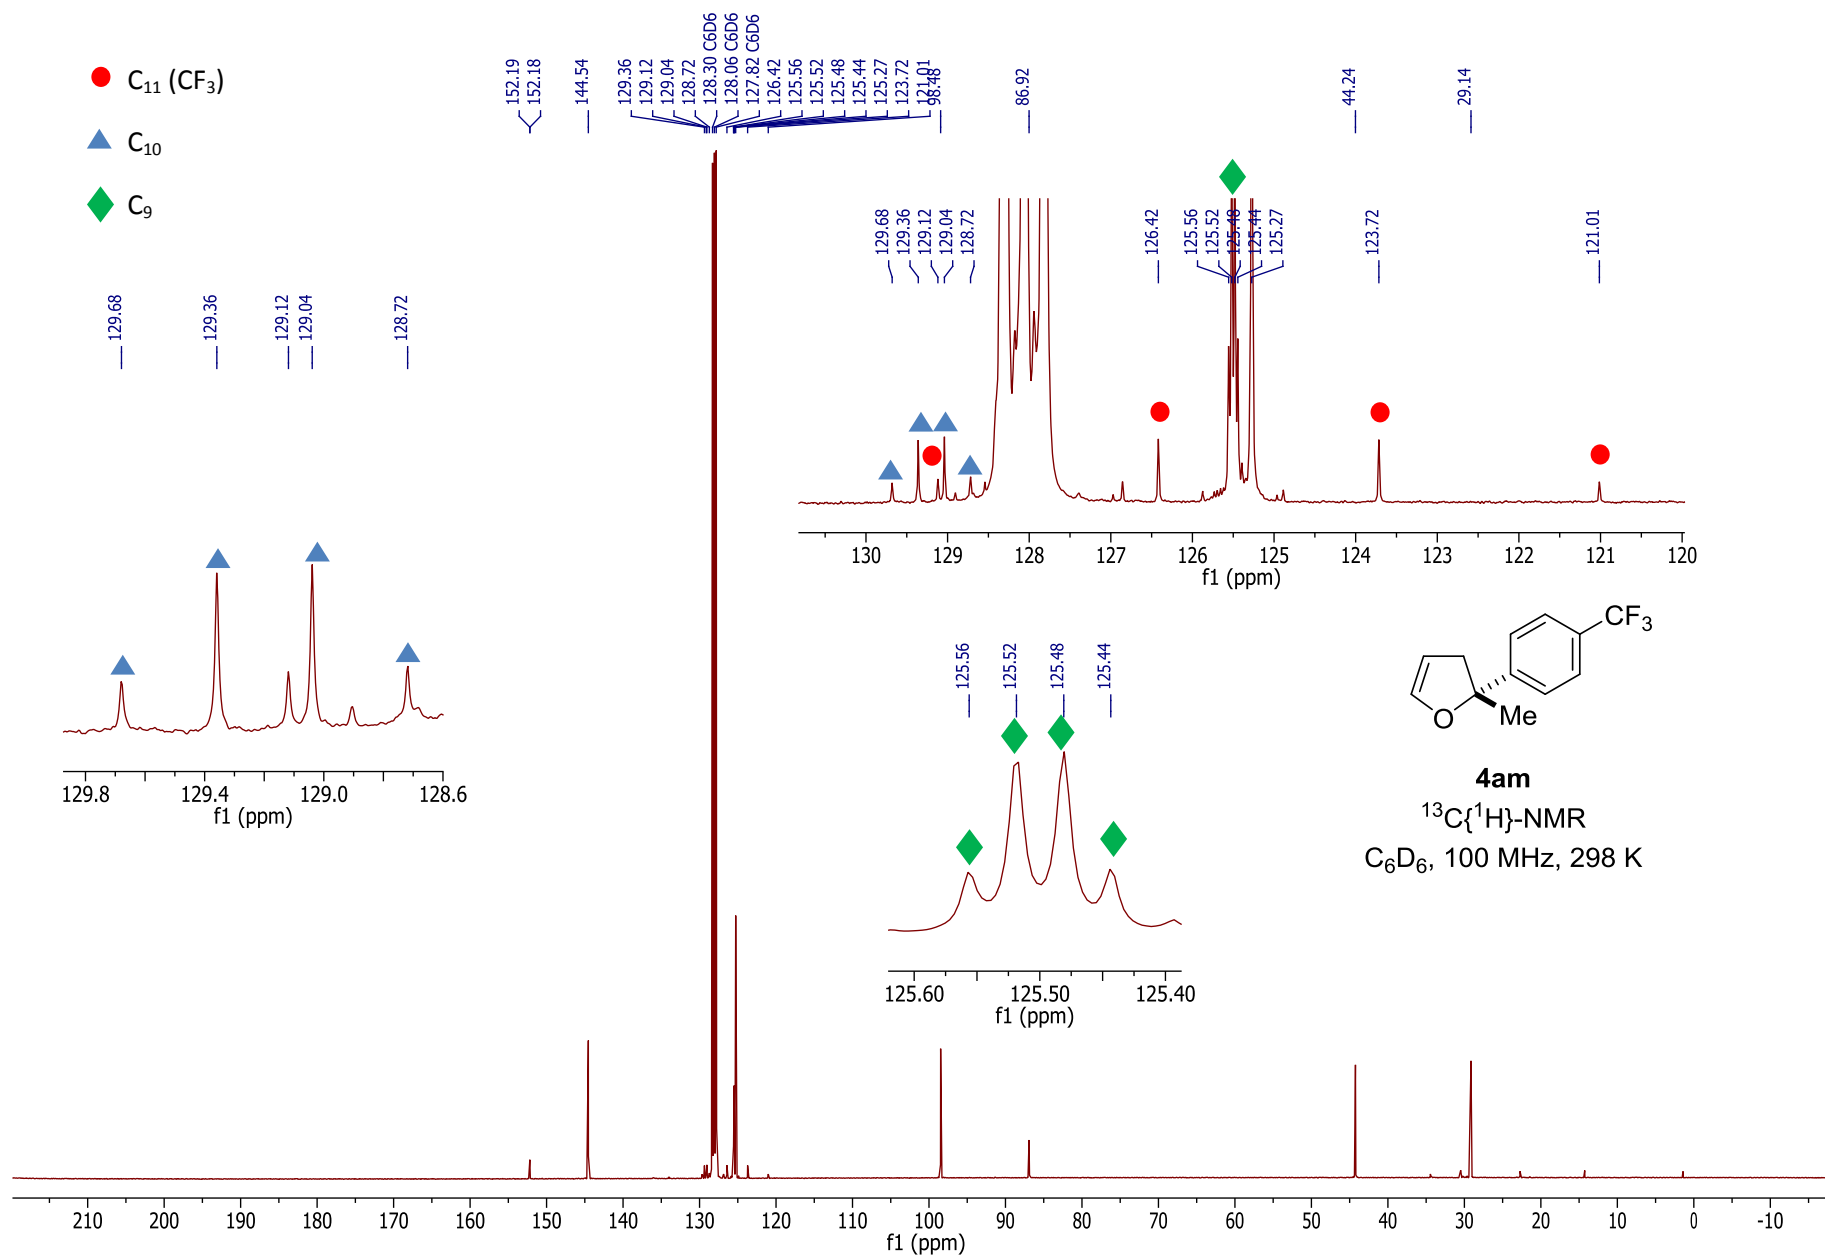

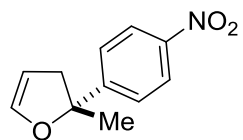**4an**<sup>1</sup>H-NMRC<sub>6</sub>D<sub>6</sub>, 400 MHz, 298 K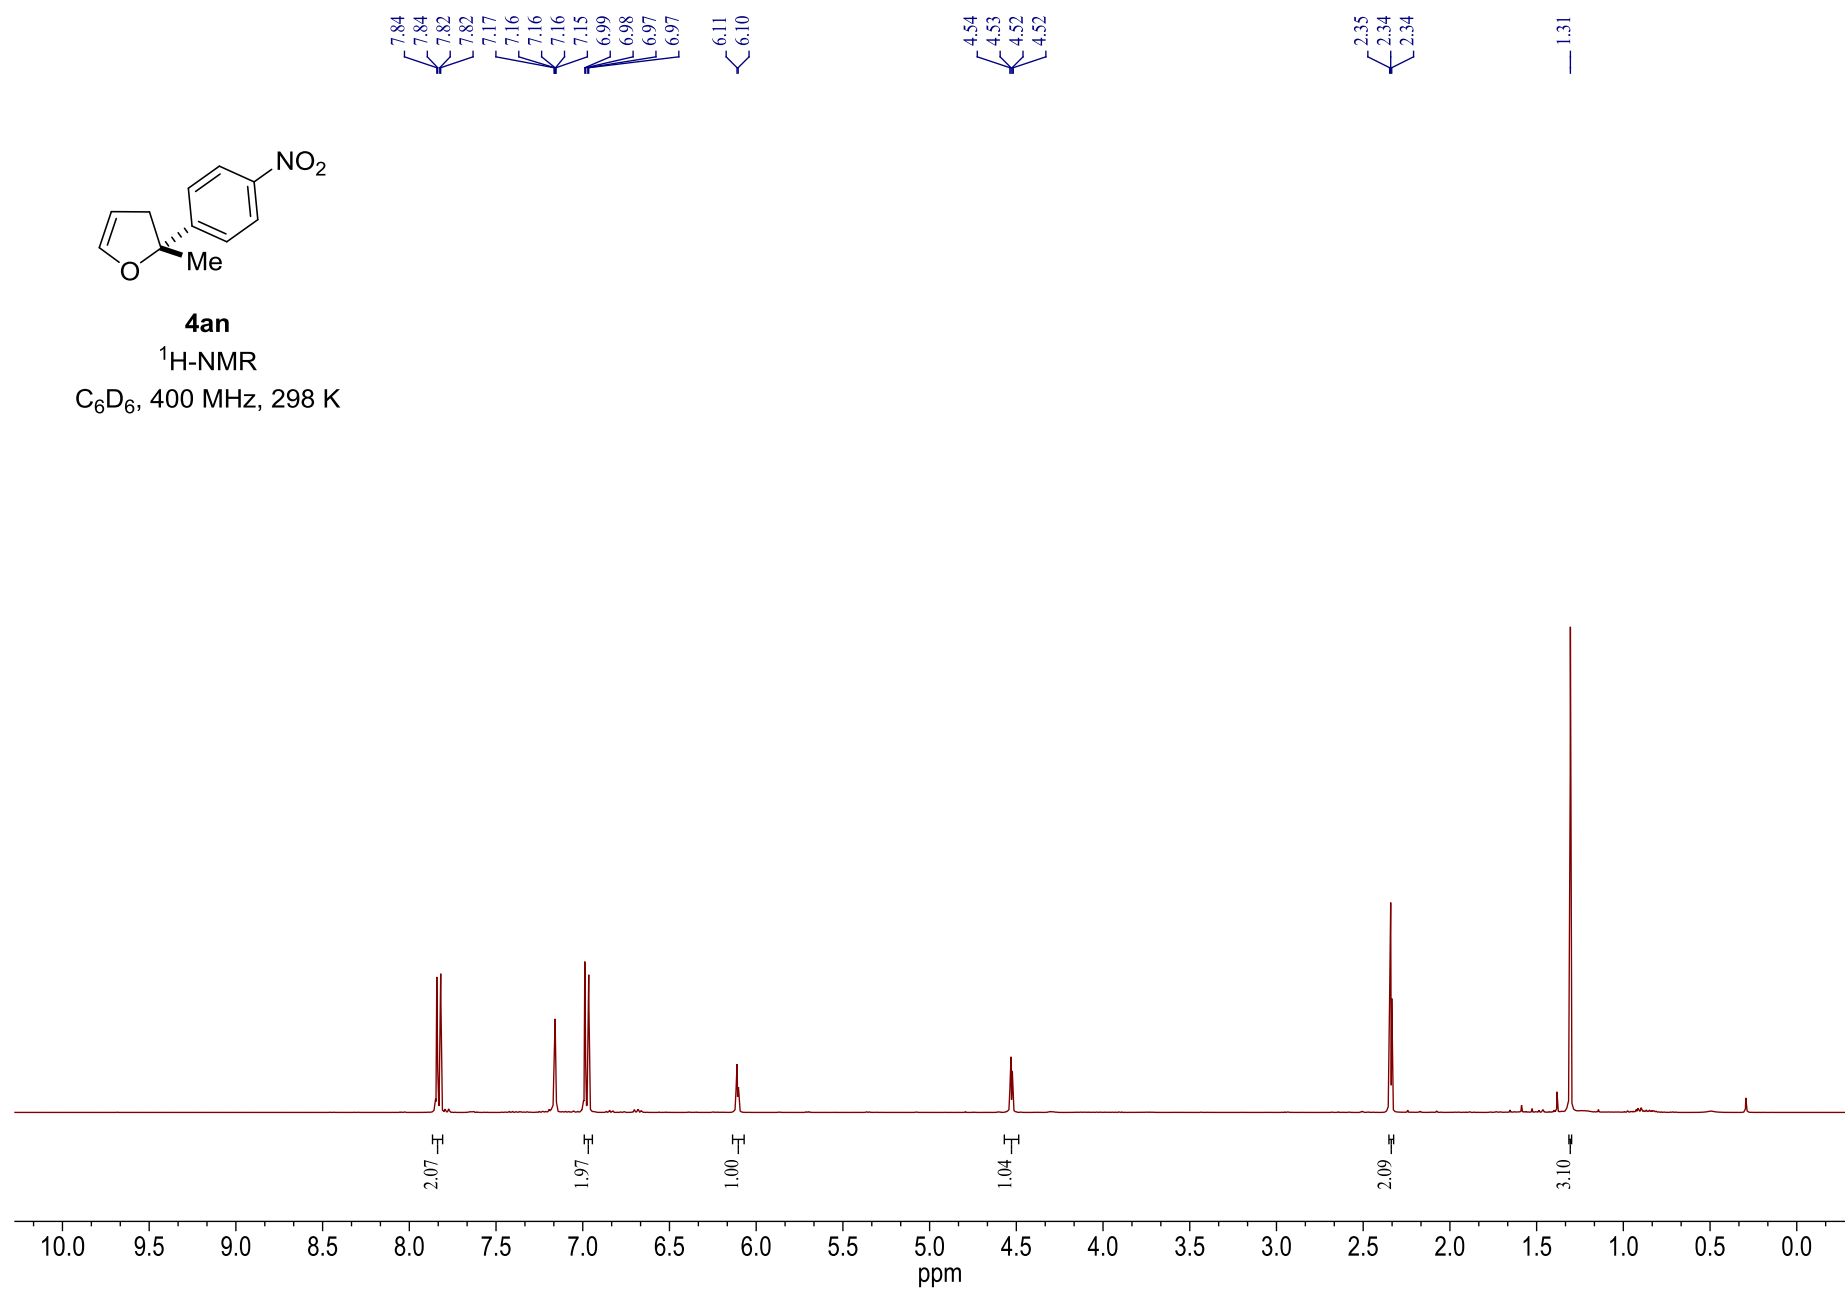

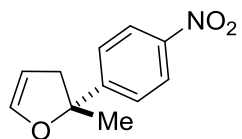**4a-n**

$^{13}\text{C}\{^1\text{H}\}$ -NMR  
 $\text{C}_6\text{D}_6$ , 100 MHz, 298 K

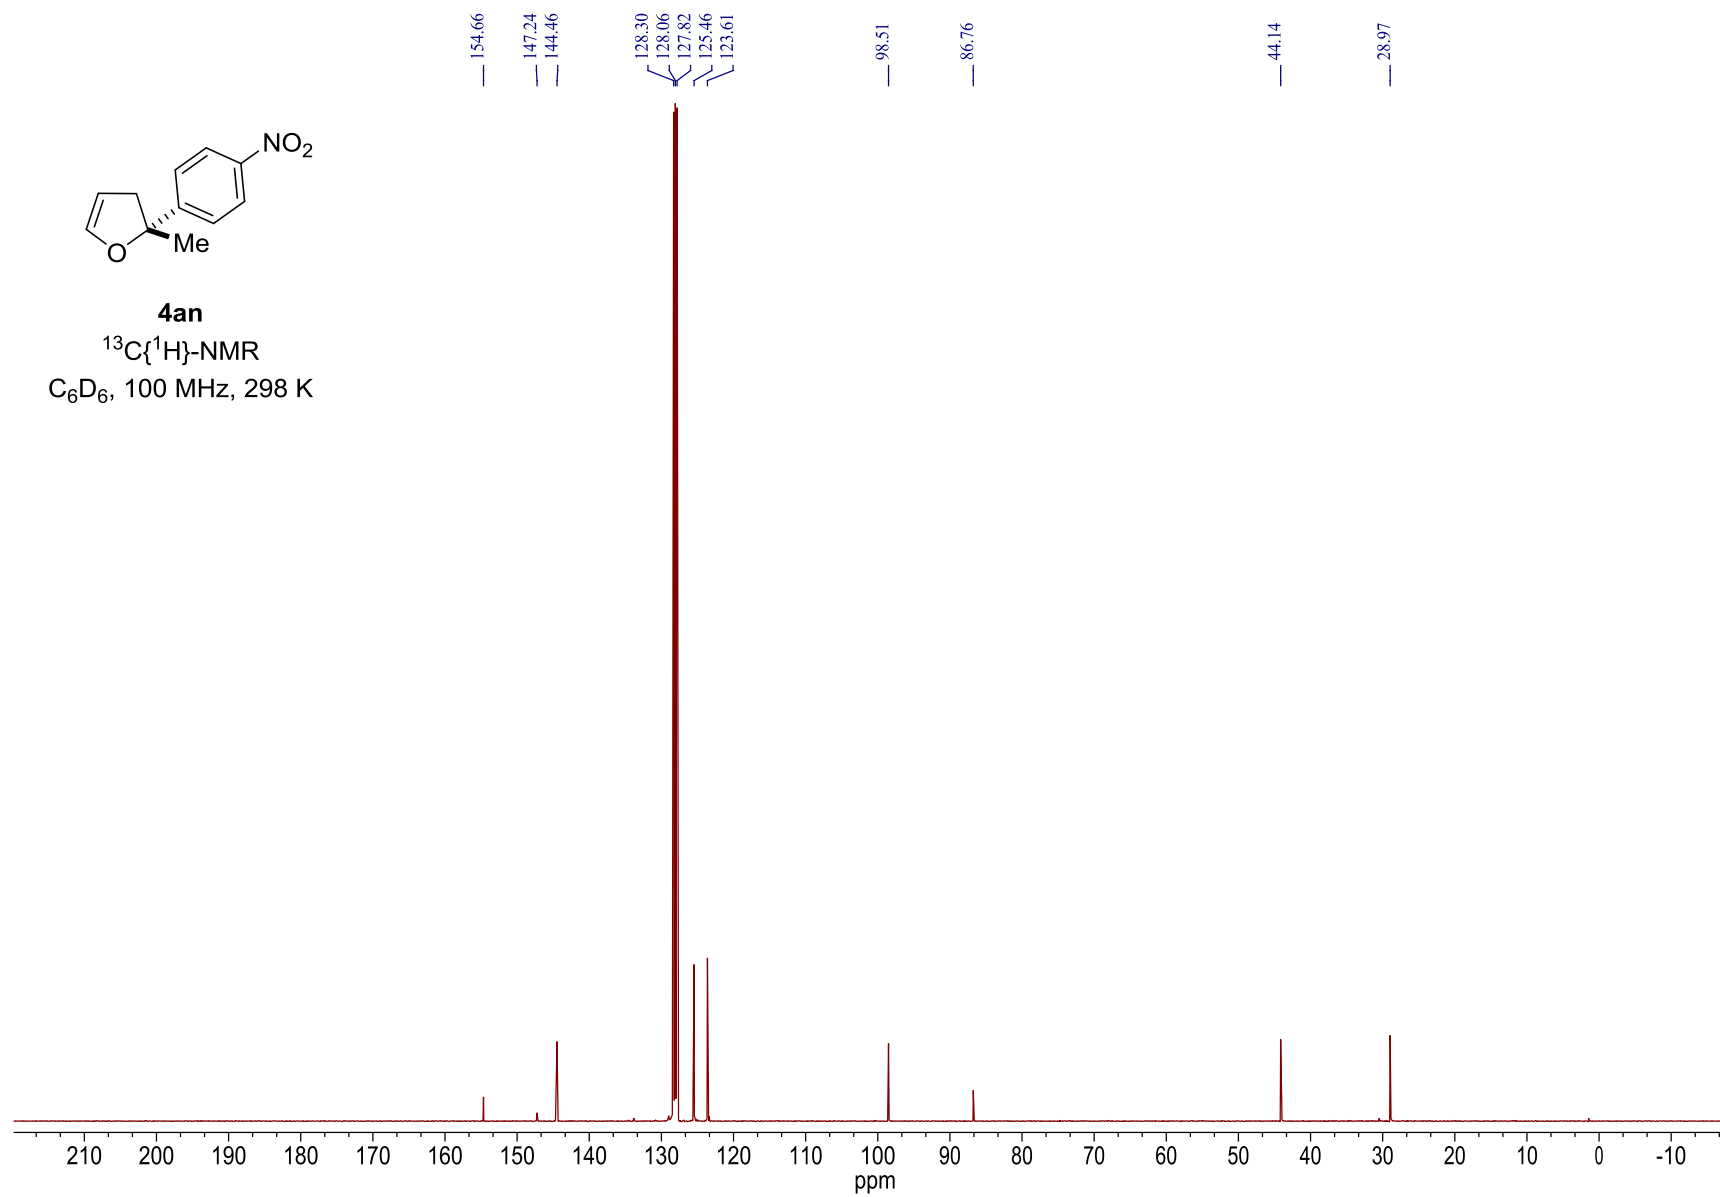

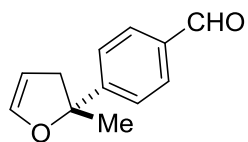**4ao**<sup>1</sup>H-NMRC<sub>6</sub>D<sub>6</sub>, 400 MHz, 298 K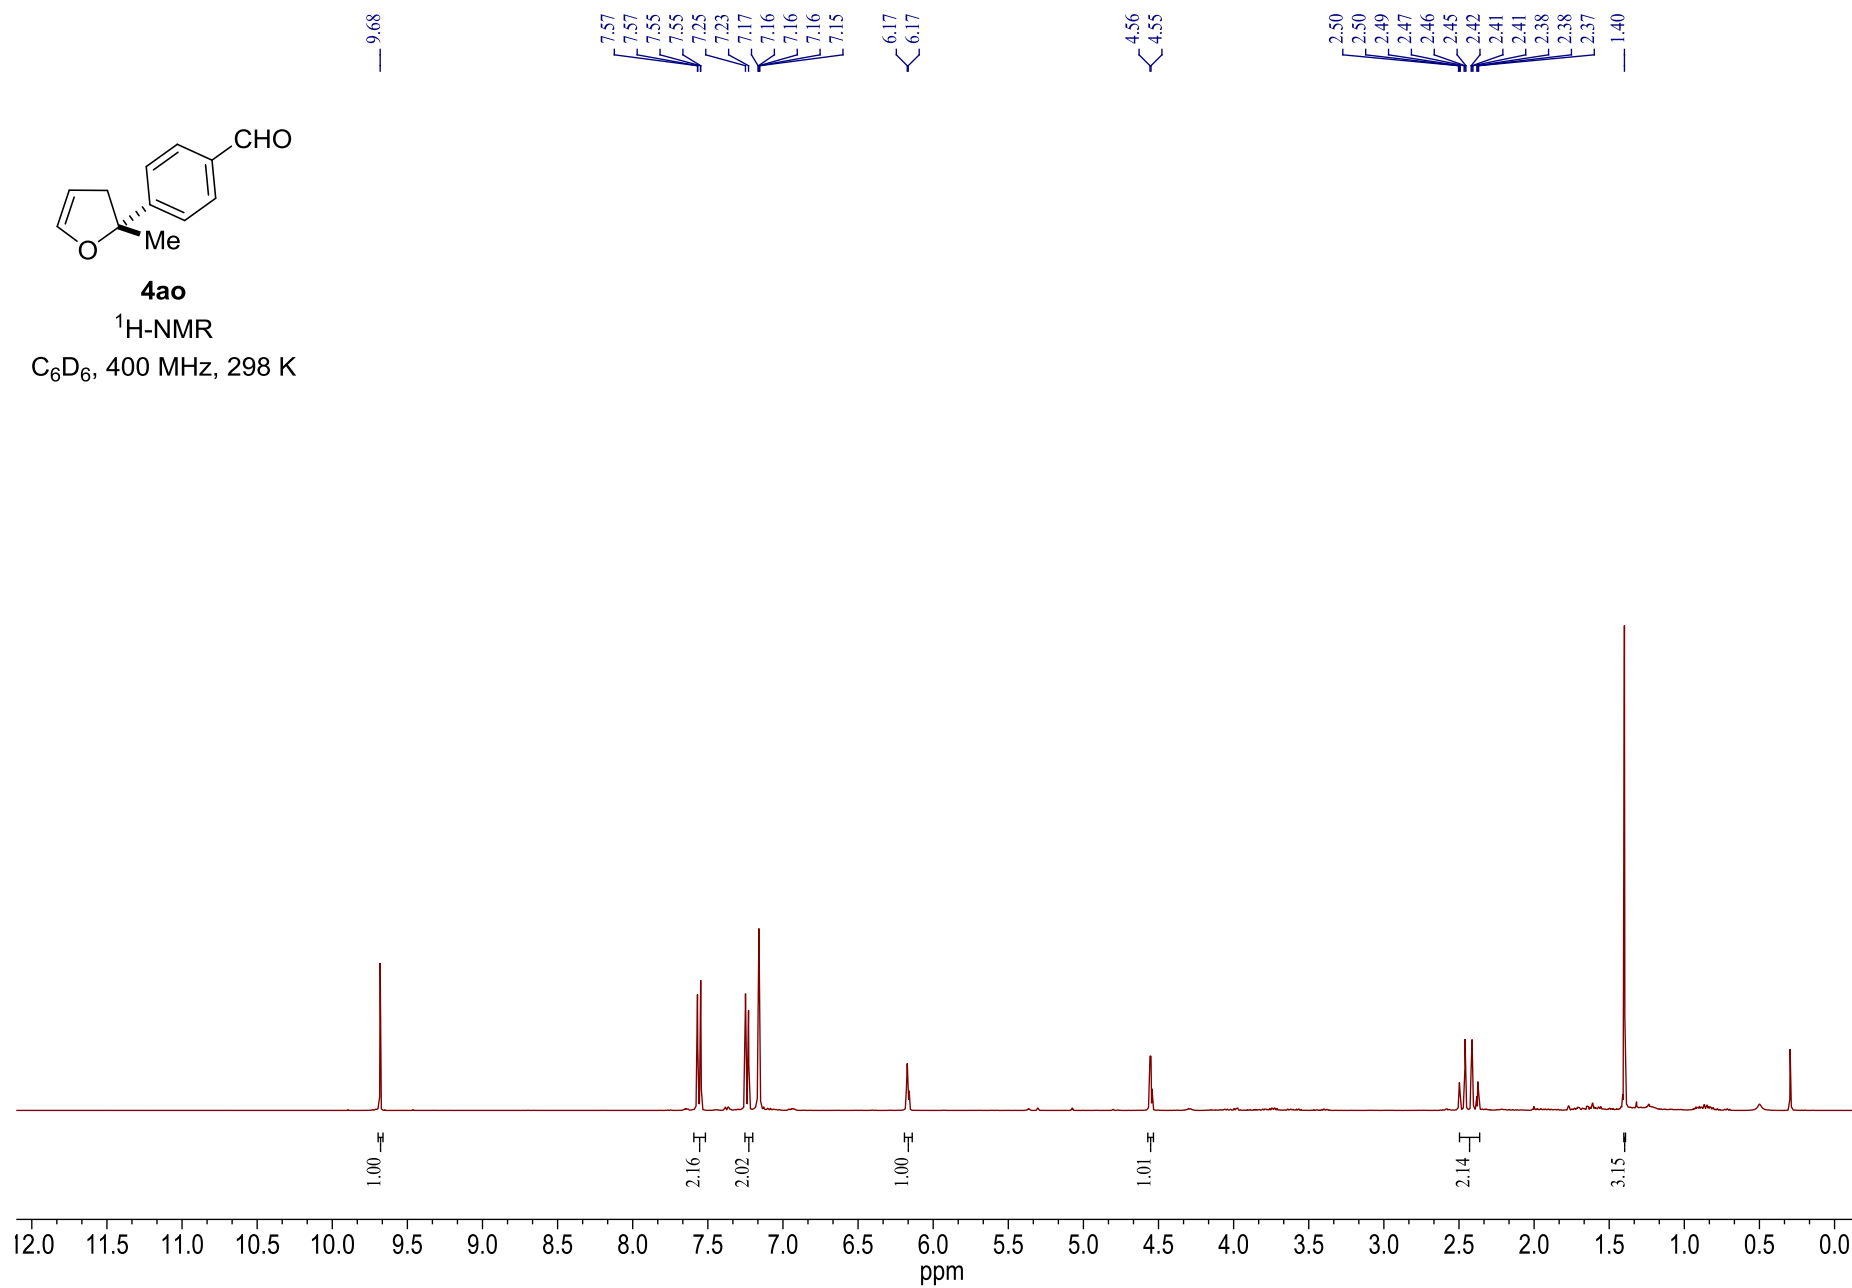

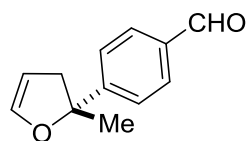**4ao**

$^{13}\text{C}\{^1\text{H}\}$ -NMR  
 $\text{C}_6\text{D}_6$ , 100 MHz, 298 K

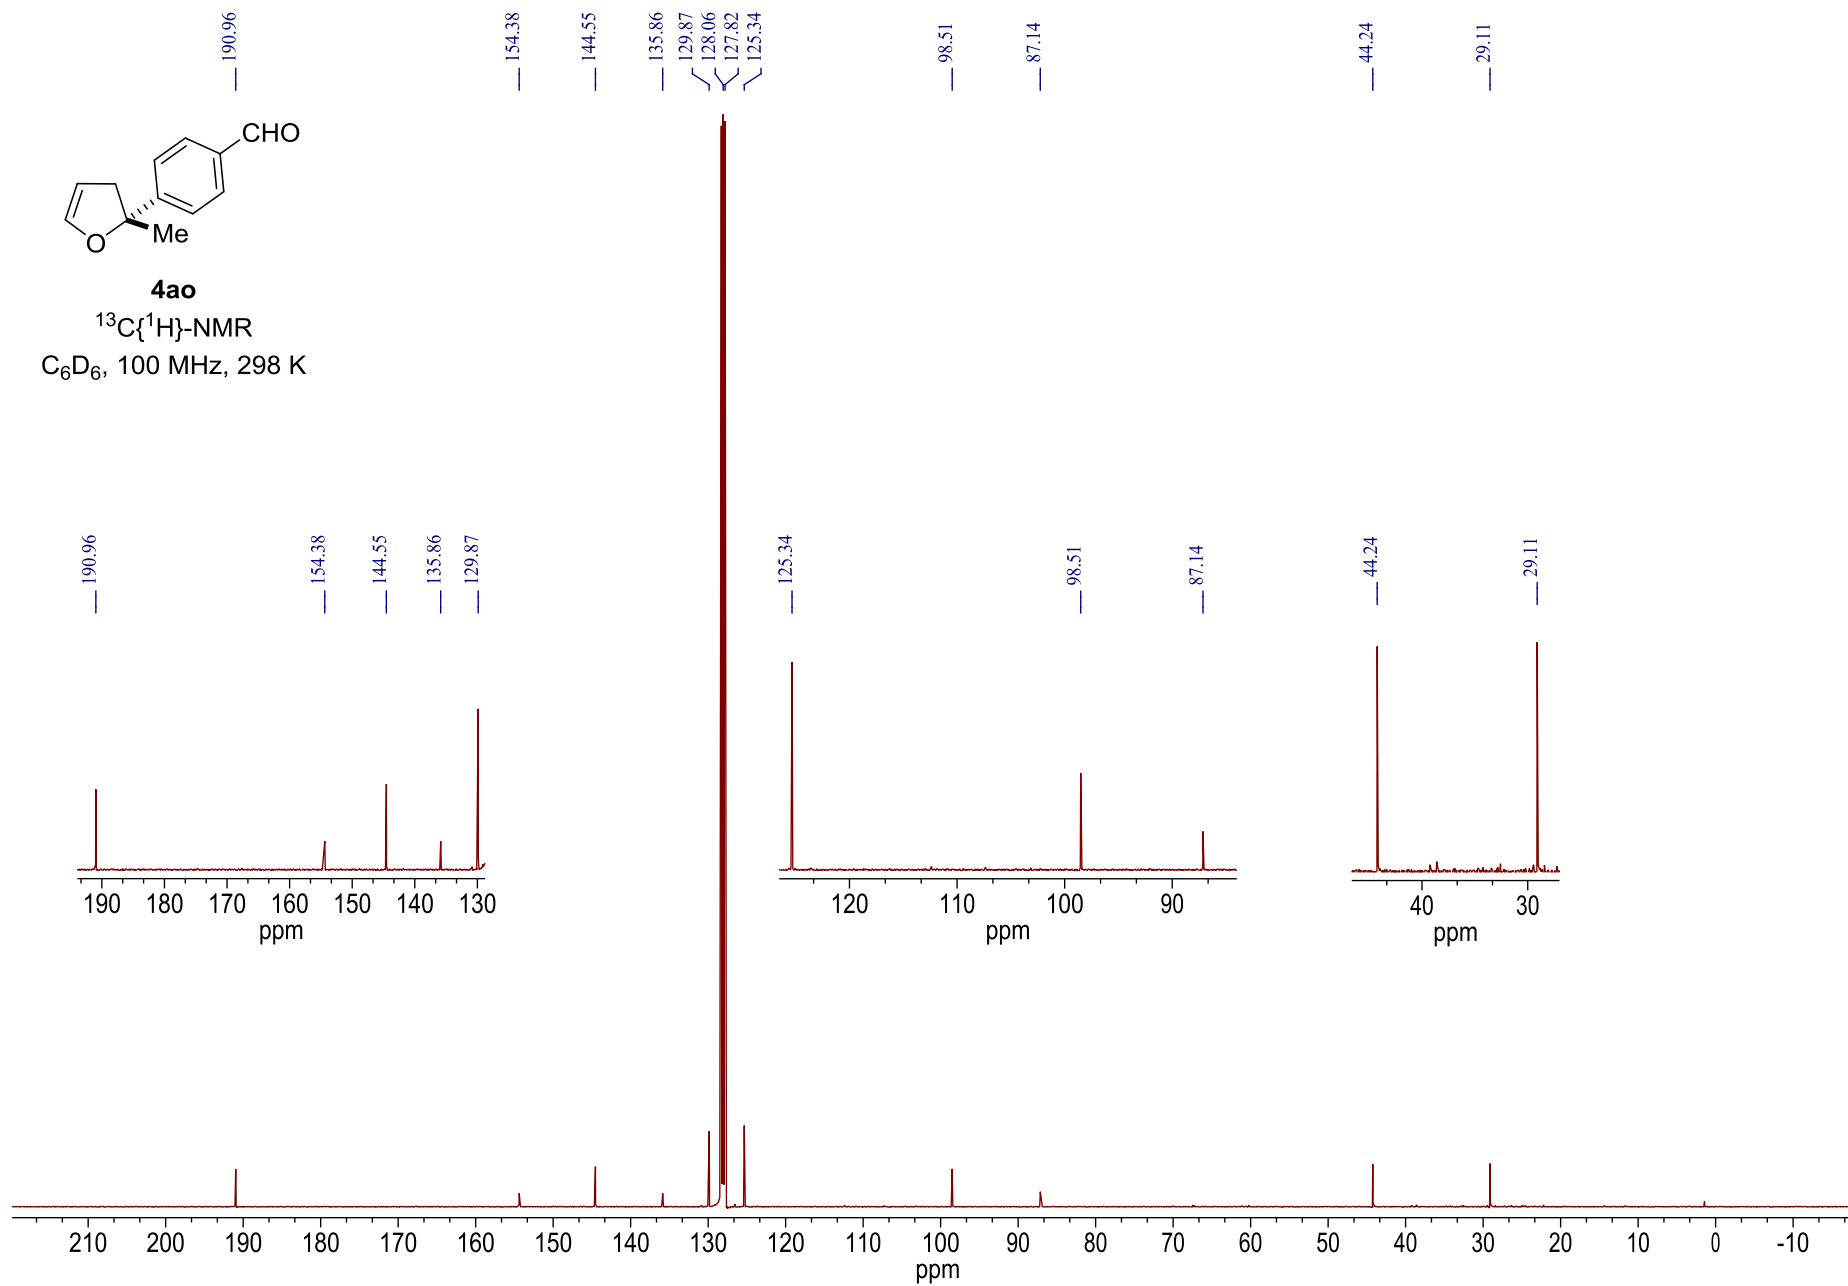

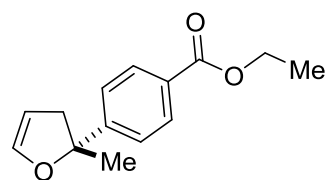**4ap** $^1\text{H-NMR}$  $\text{C}_6\text{D}_6$ , 400 MHz, 298 K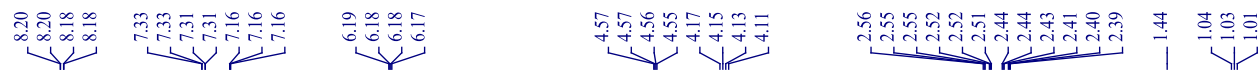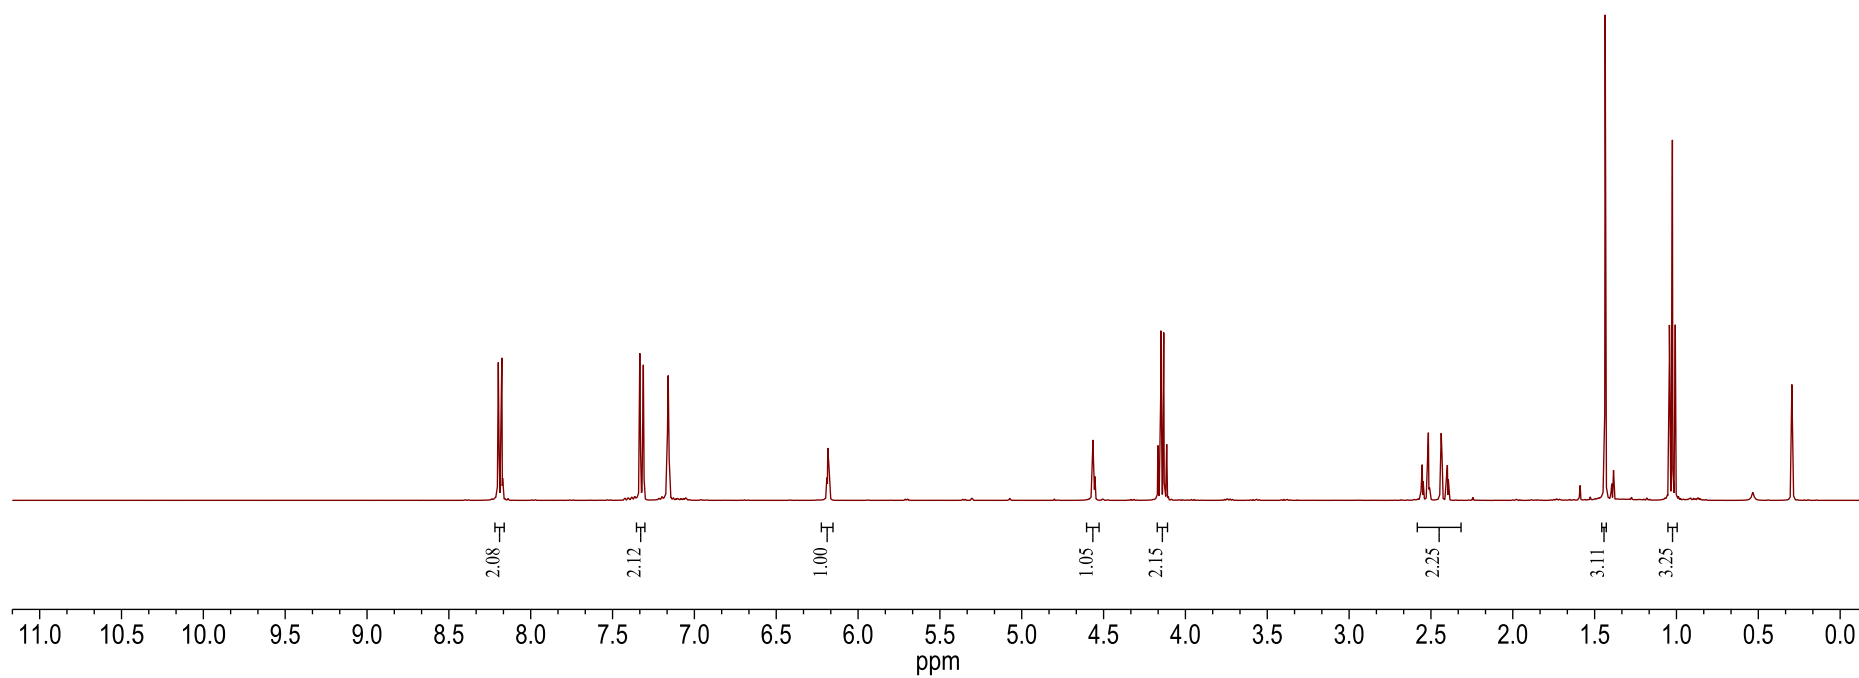

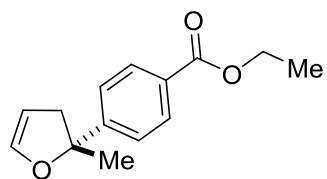**4ap**

$^{13}\text{C}\{^1\text{H}\}$ -NMR  
 $\text{C}_6\text{D}_6$ , 100 MHz, 298 K

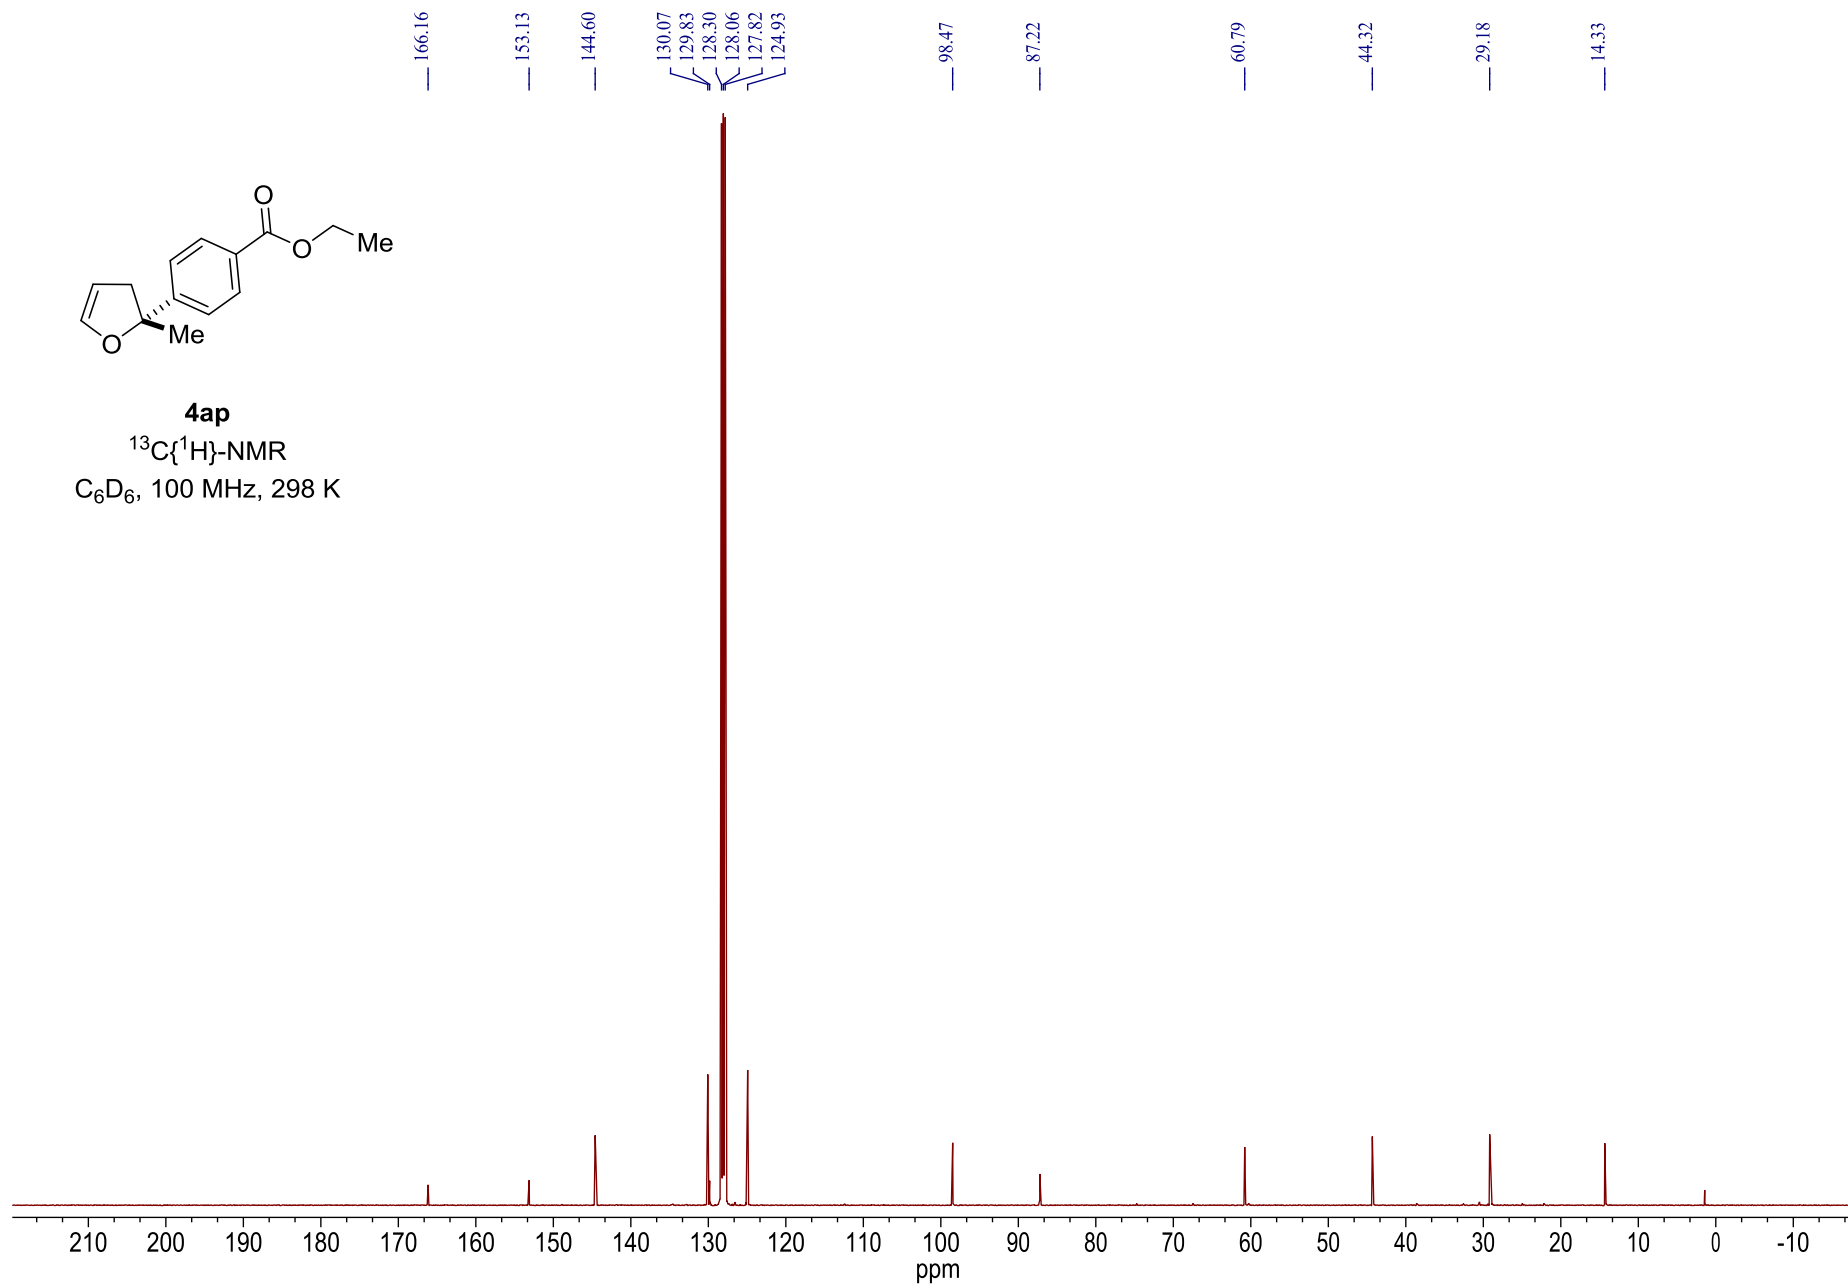



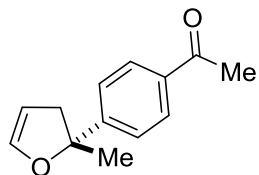**4aq** $^1\text{H-NMR}$  $\text{C}_6\text{D}_6$ , 400 MHz, 298 K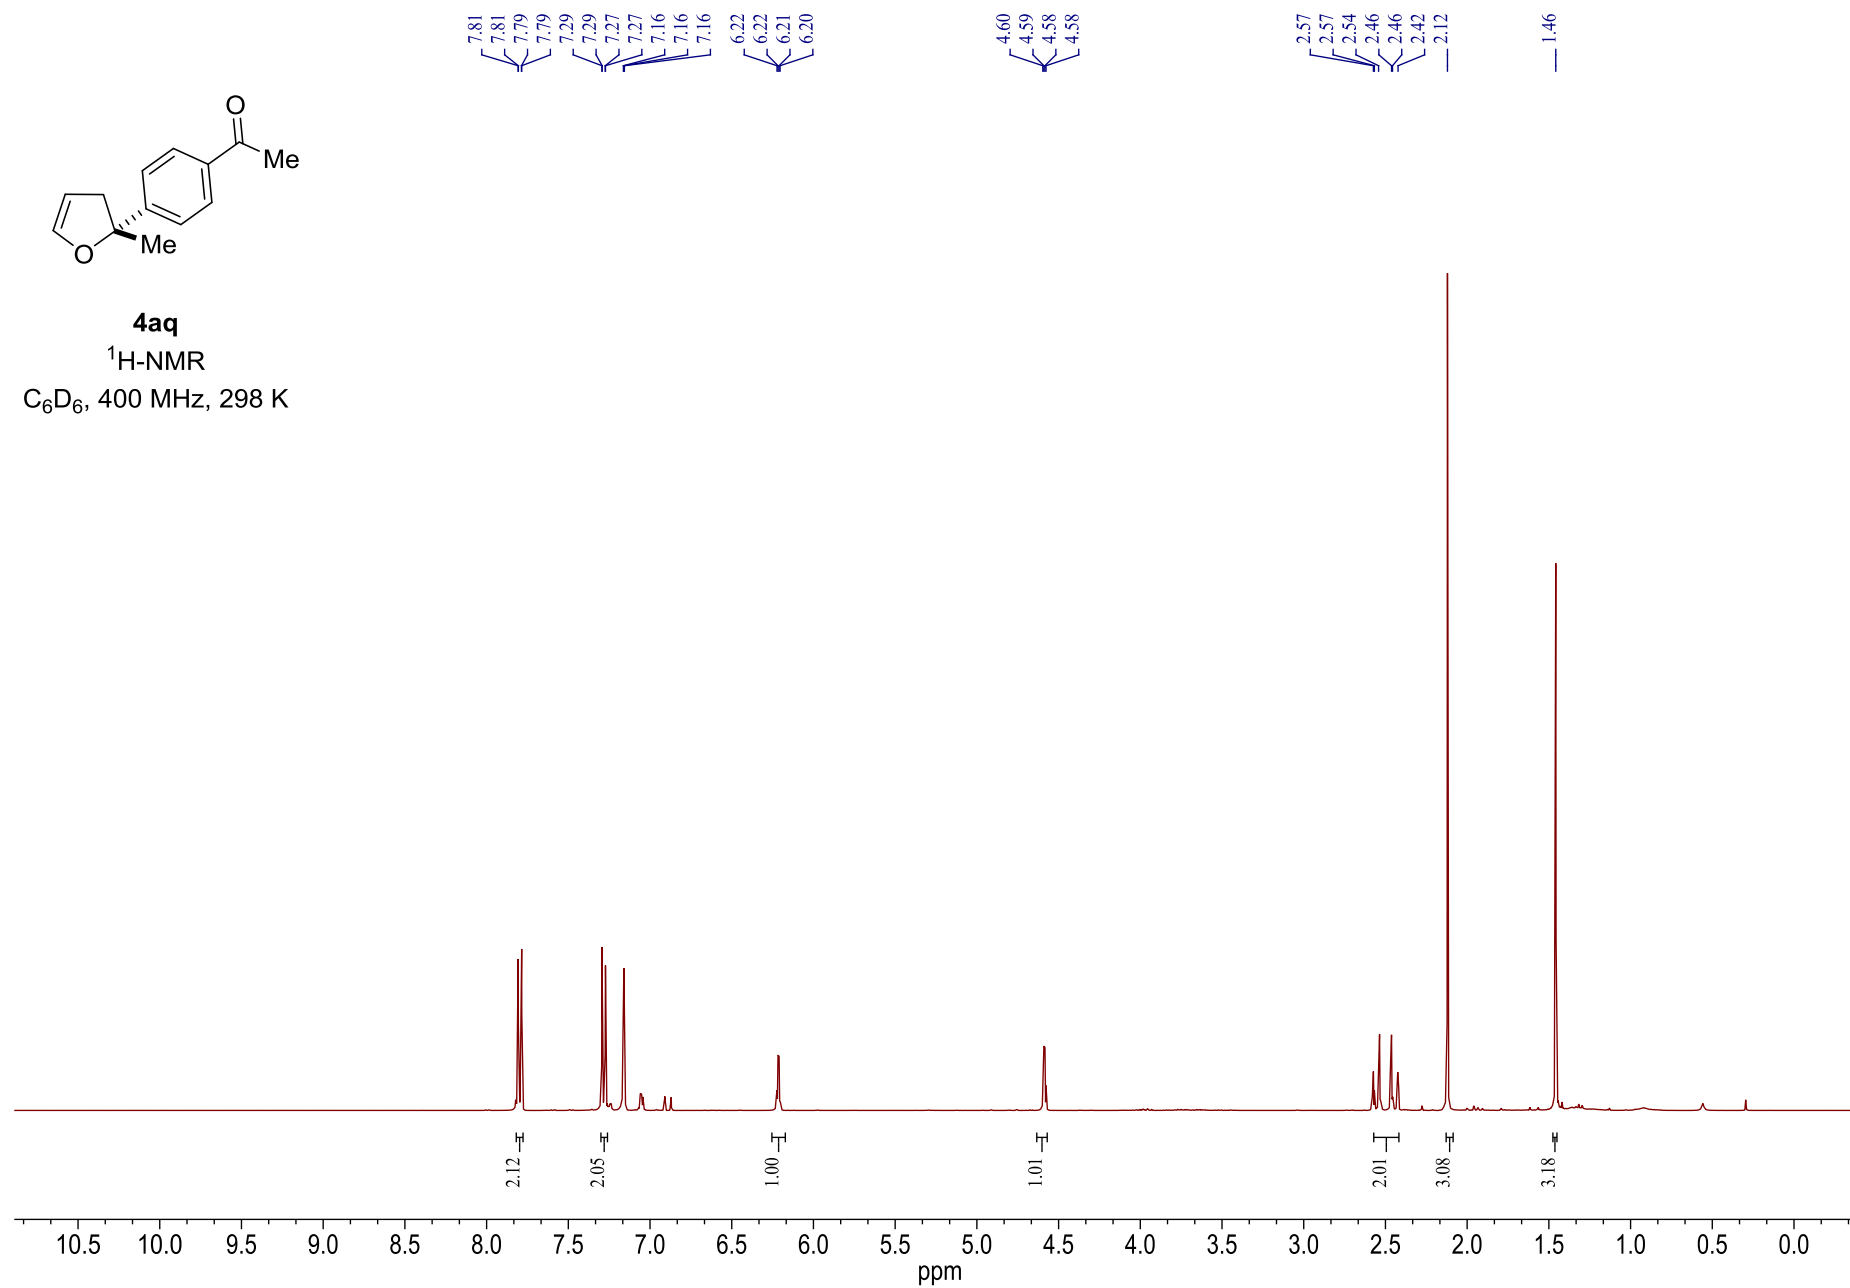

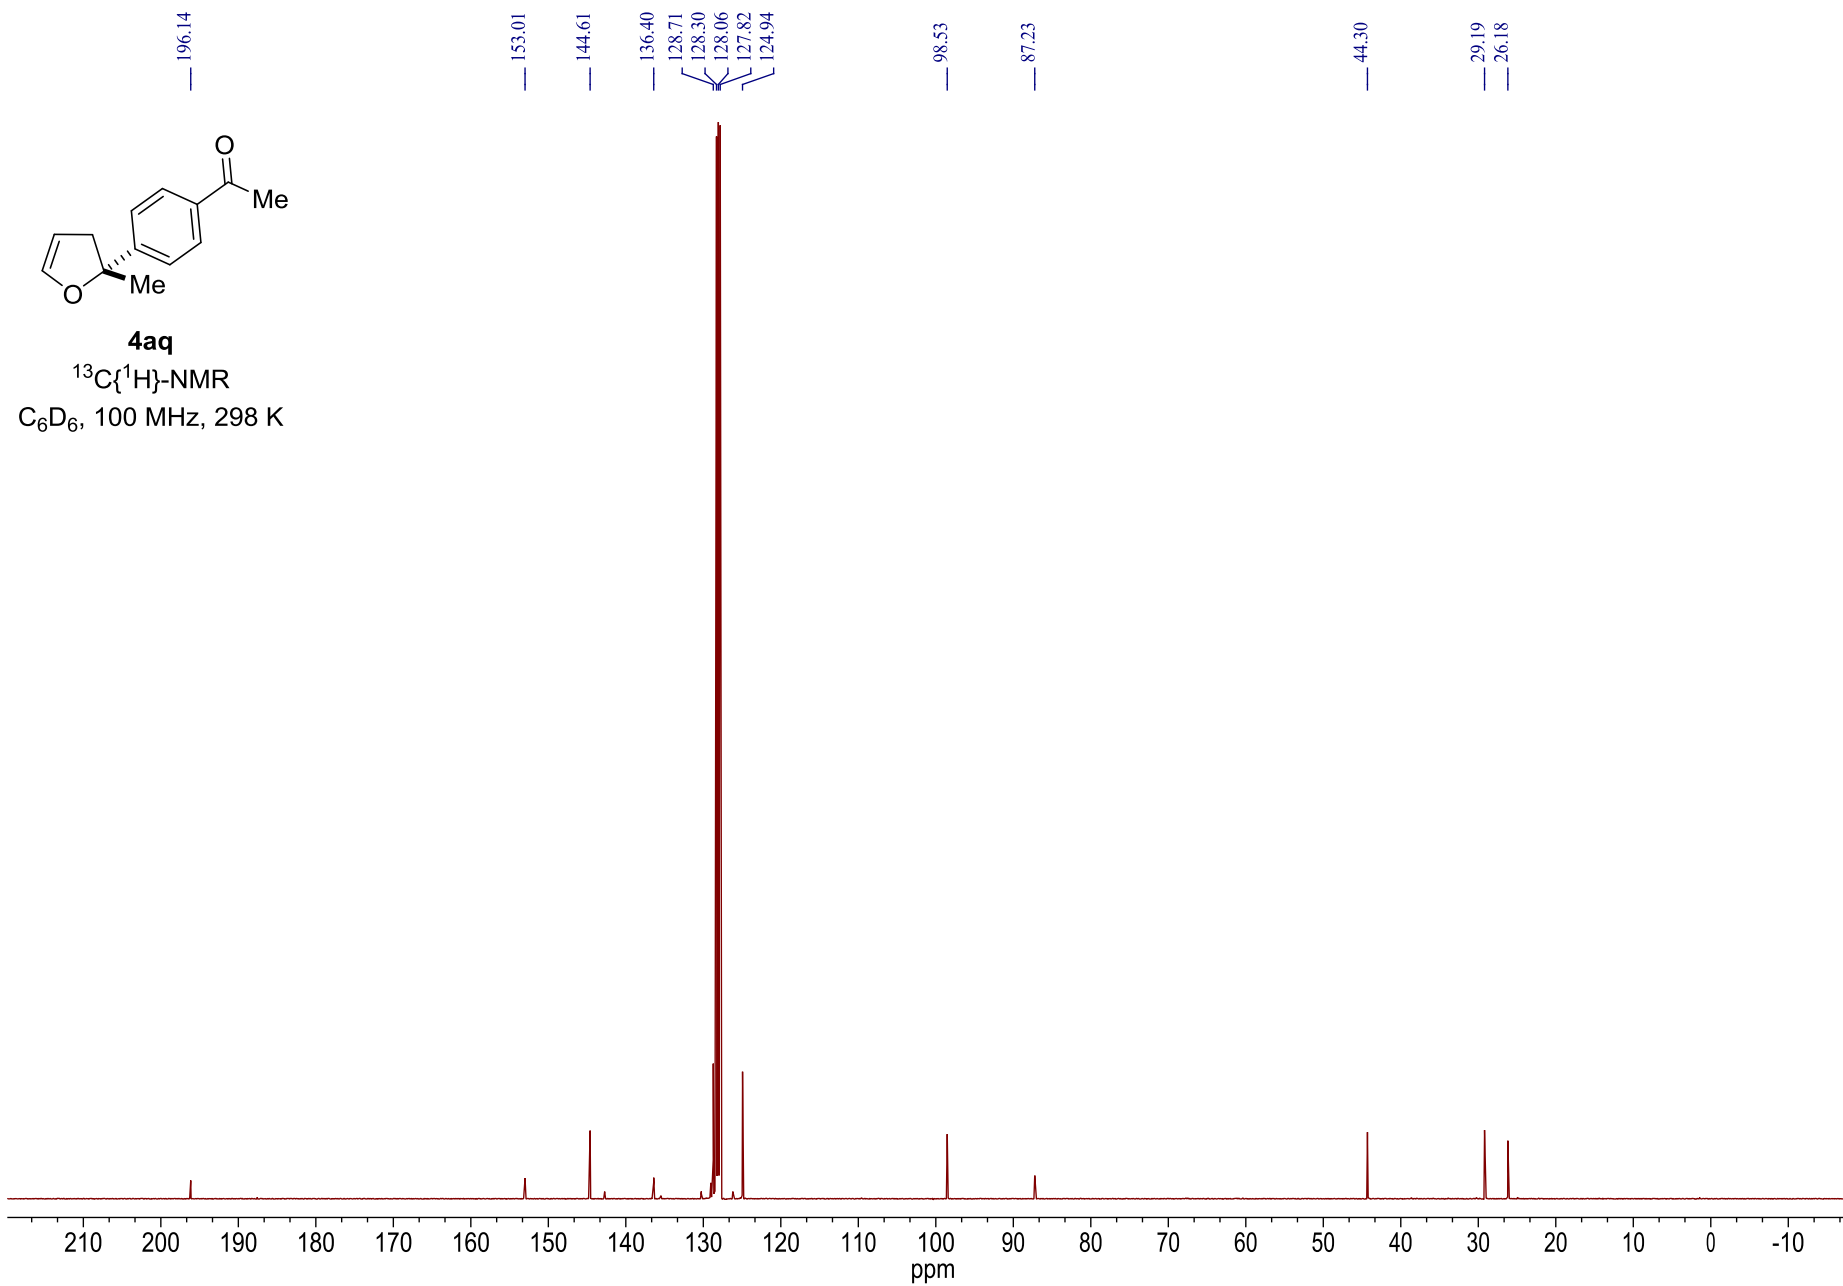

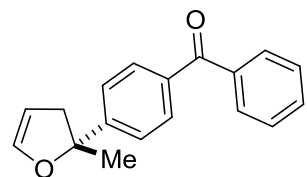**4ar**<sup>1</sup>H-NMRC<sub>6</sub>D<sub>6</sub>, 400 MHz, 298 K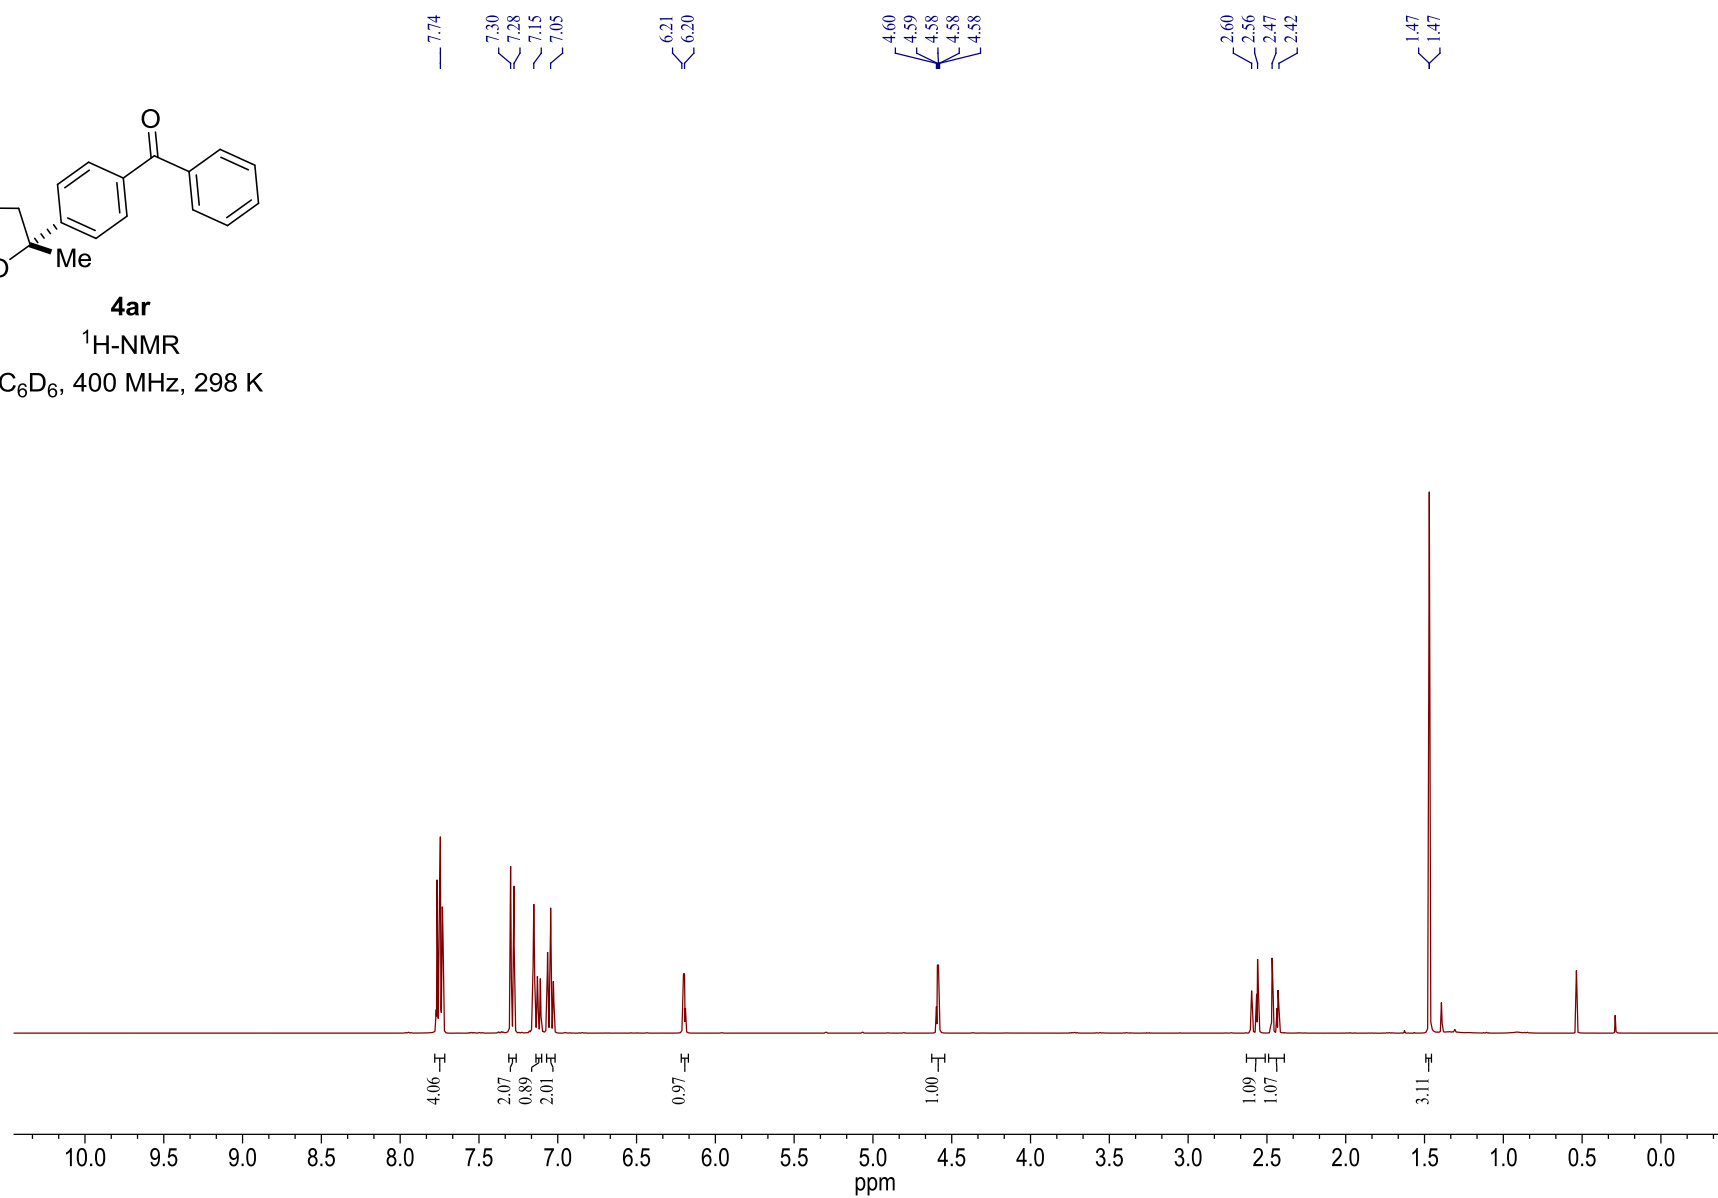

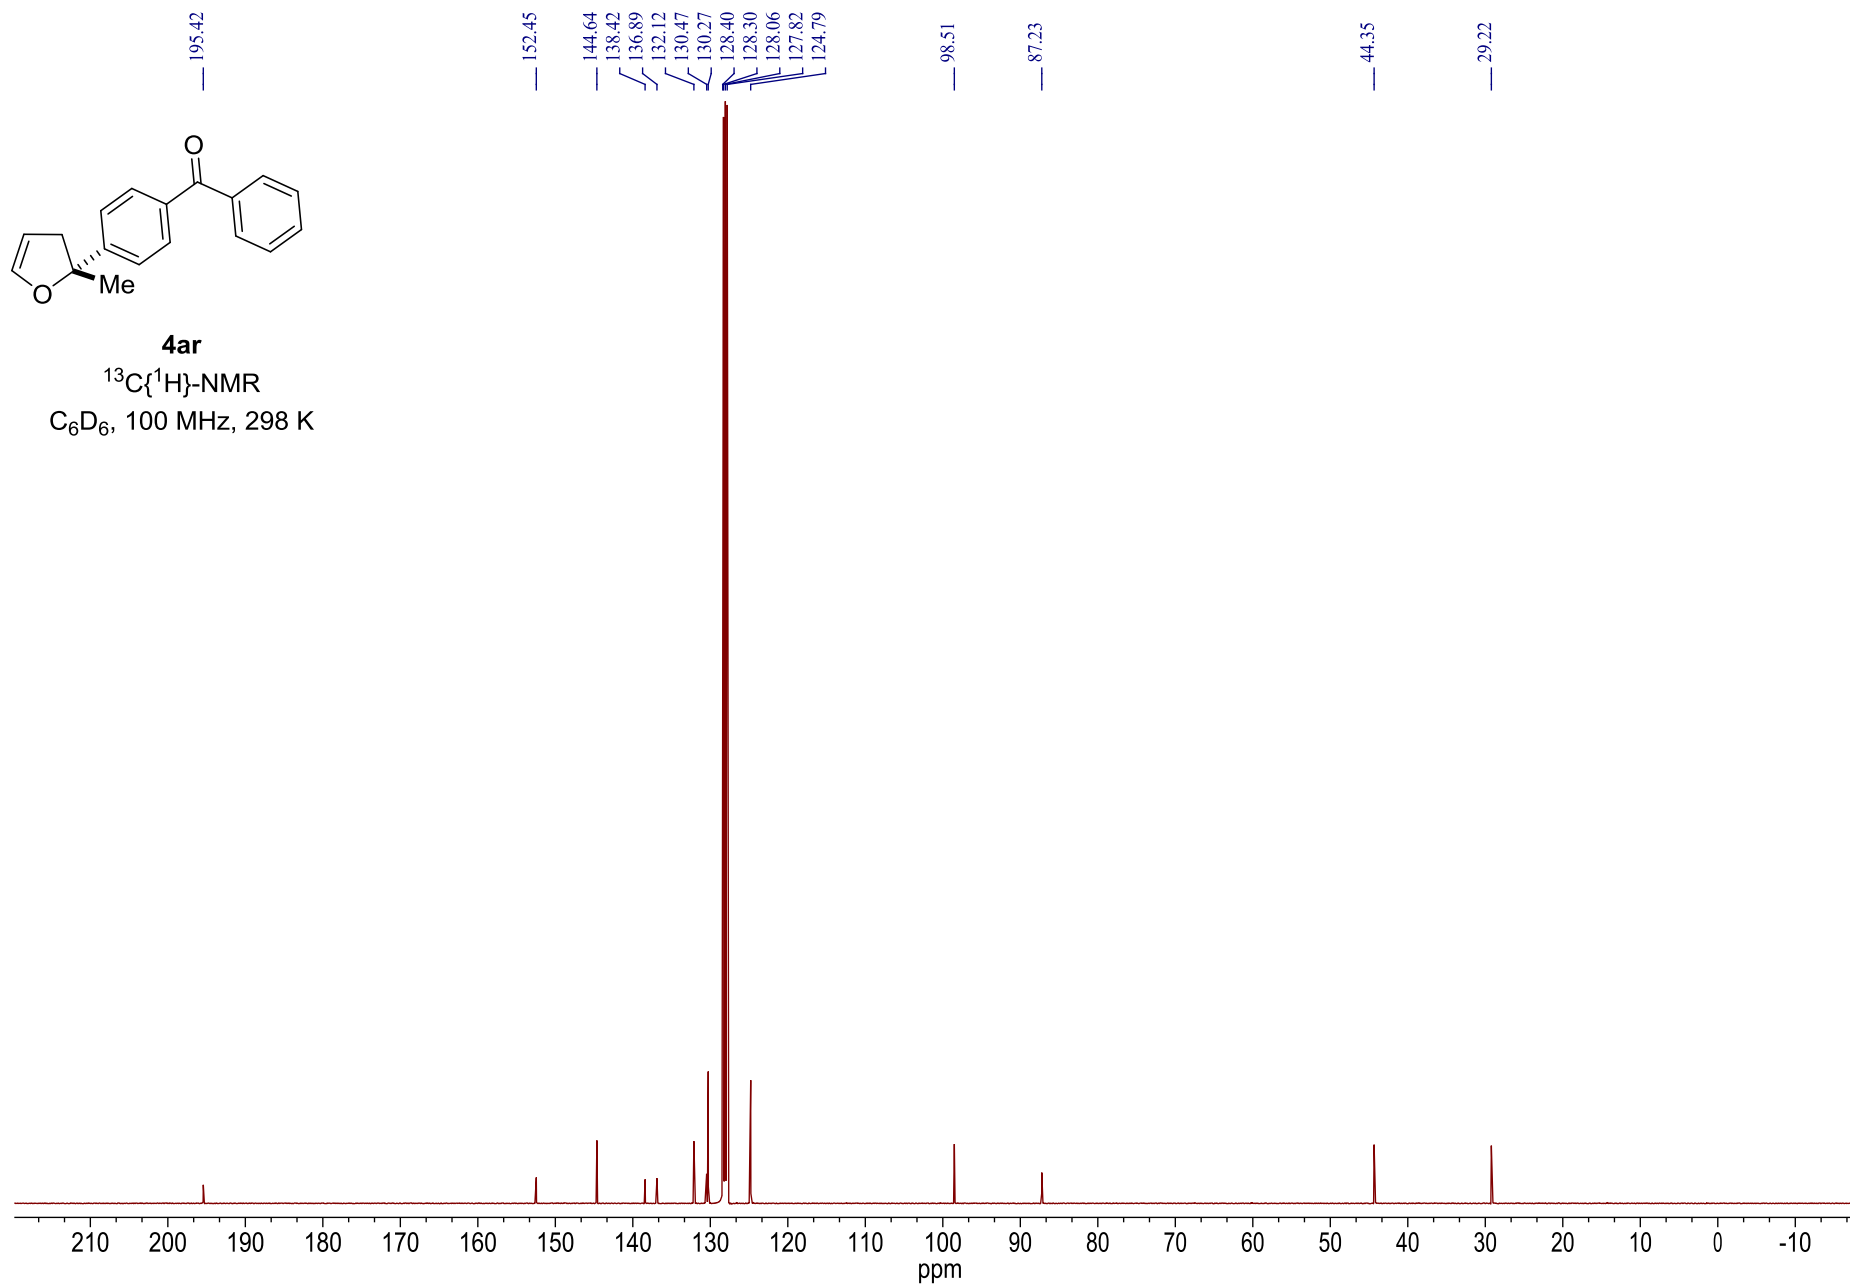

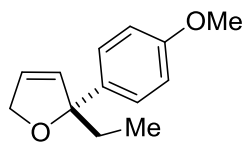**3b**<sup>1</sup>H-NMRC<sub>6</sub>D<sub>6</sub>, 400 MHz, 298 K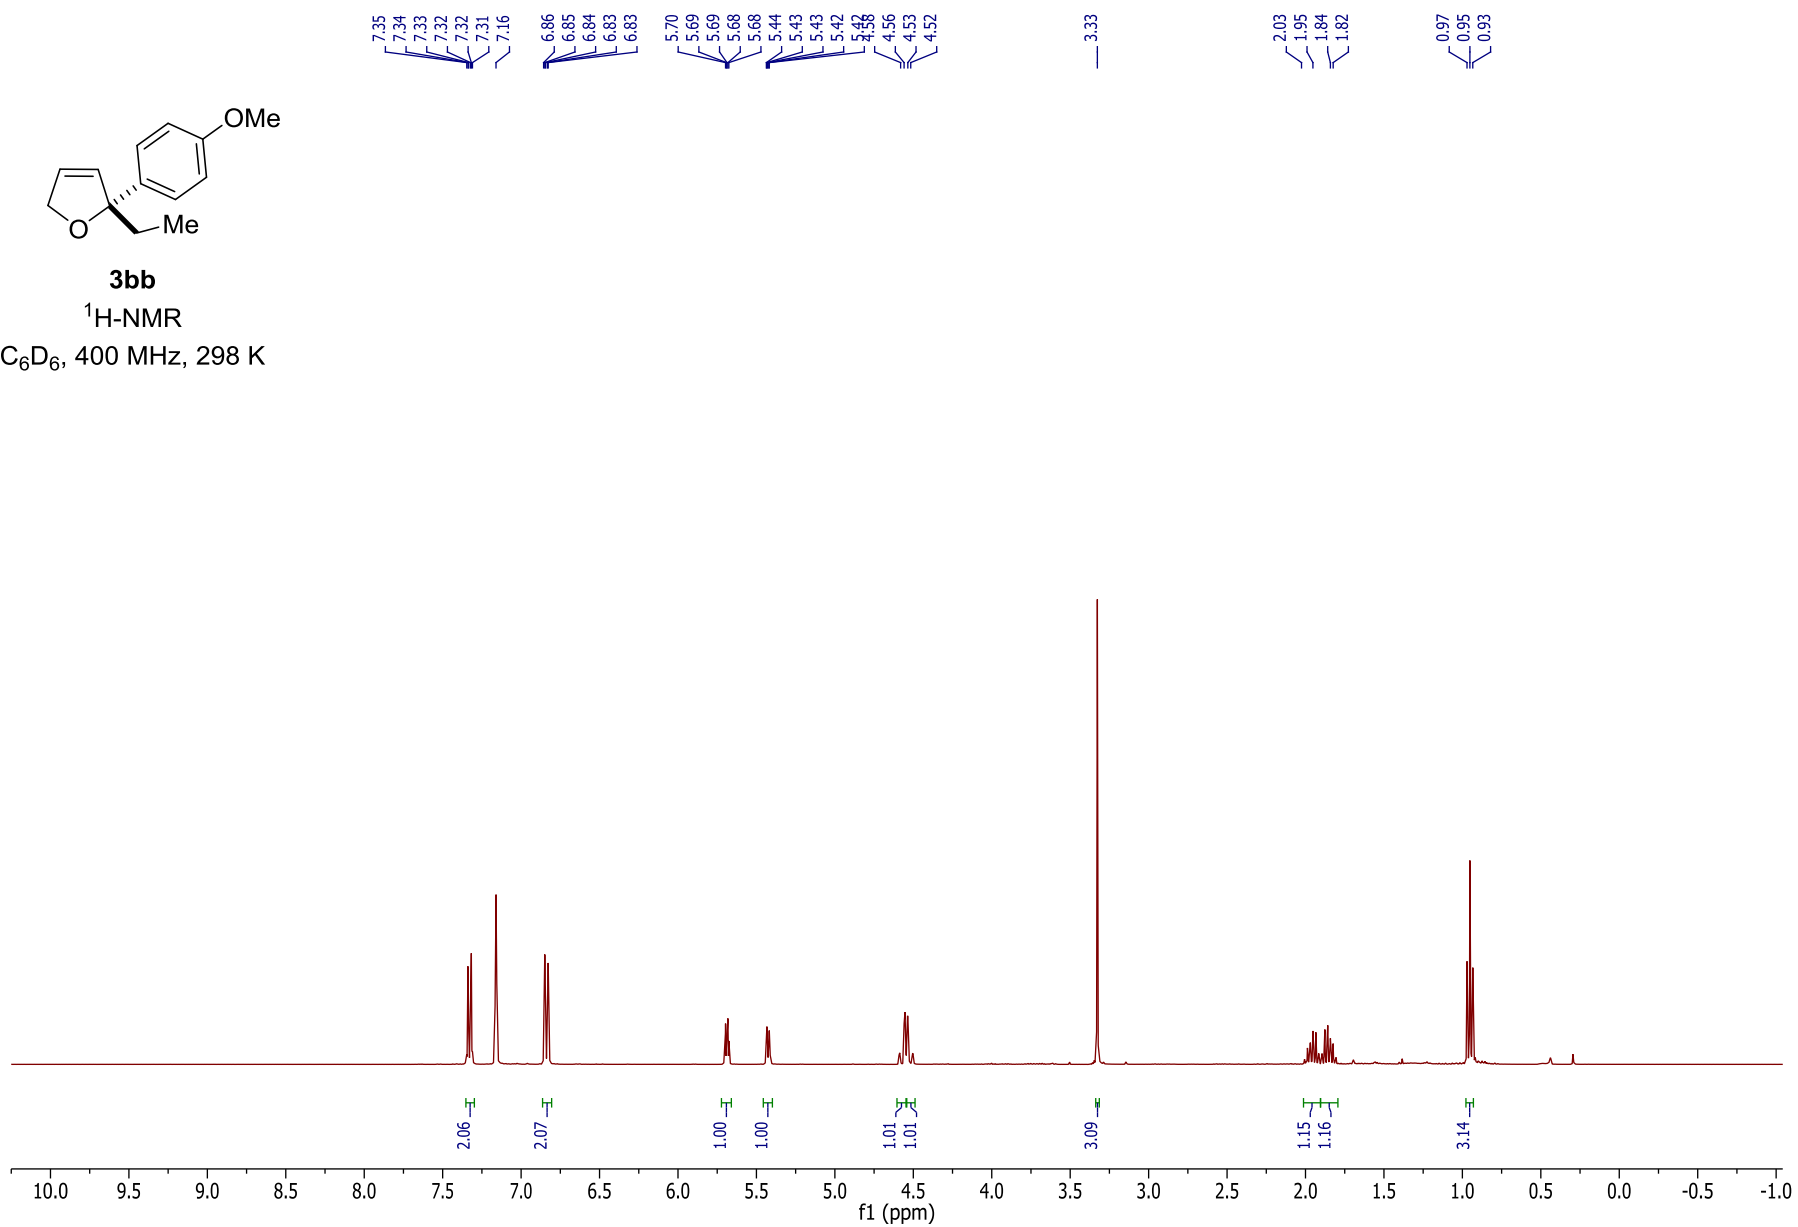

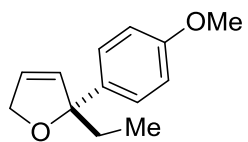**3bb**

$^{13}\text{C}\{^1\text{H}\}$ -NMR  
 $\text{C}_6\text{D}_6$ , 100 MHz, 298 K

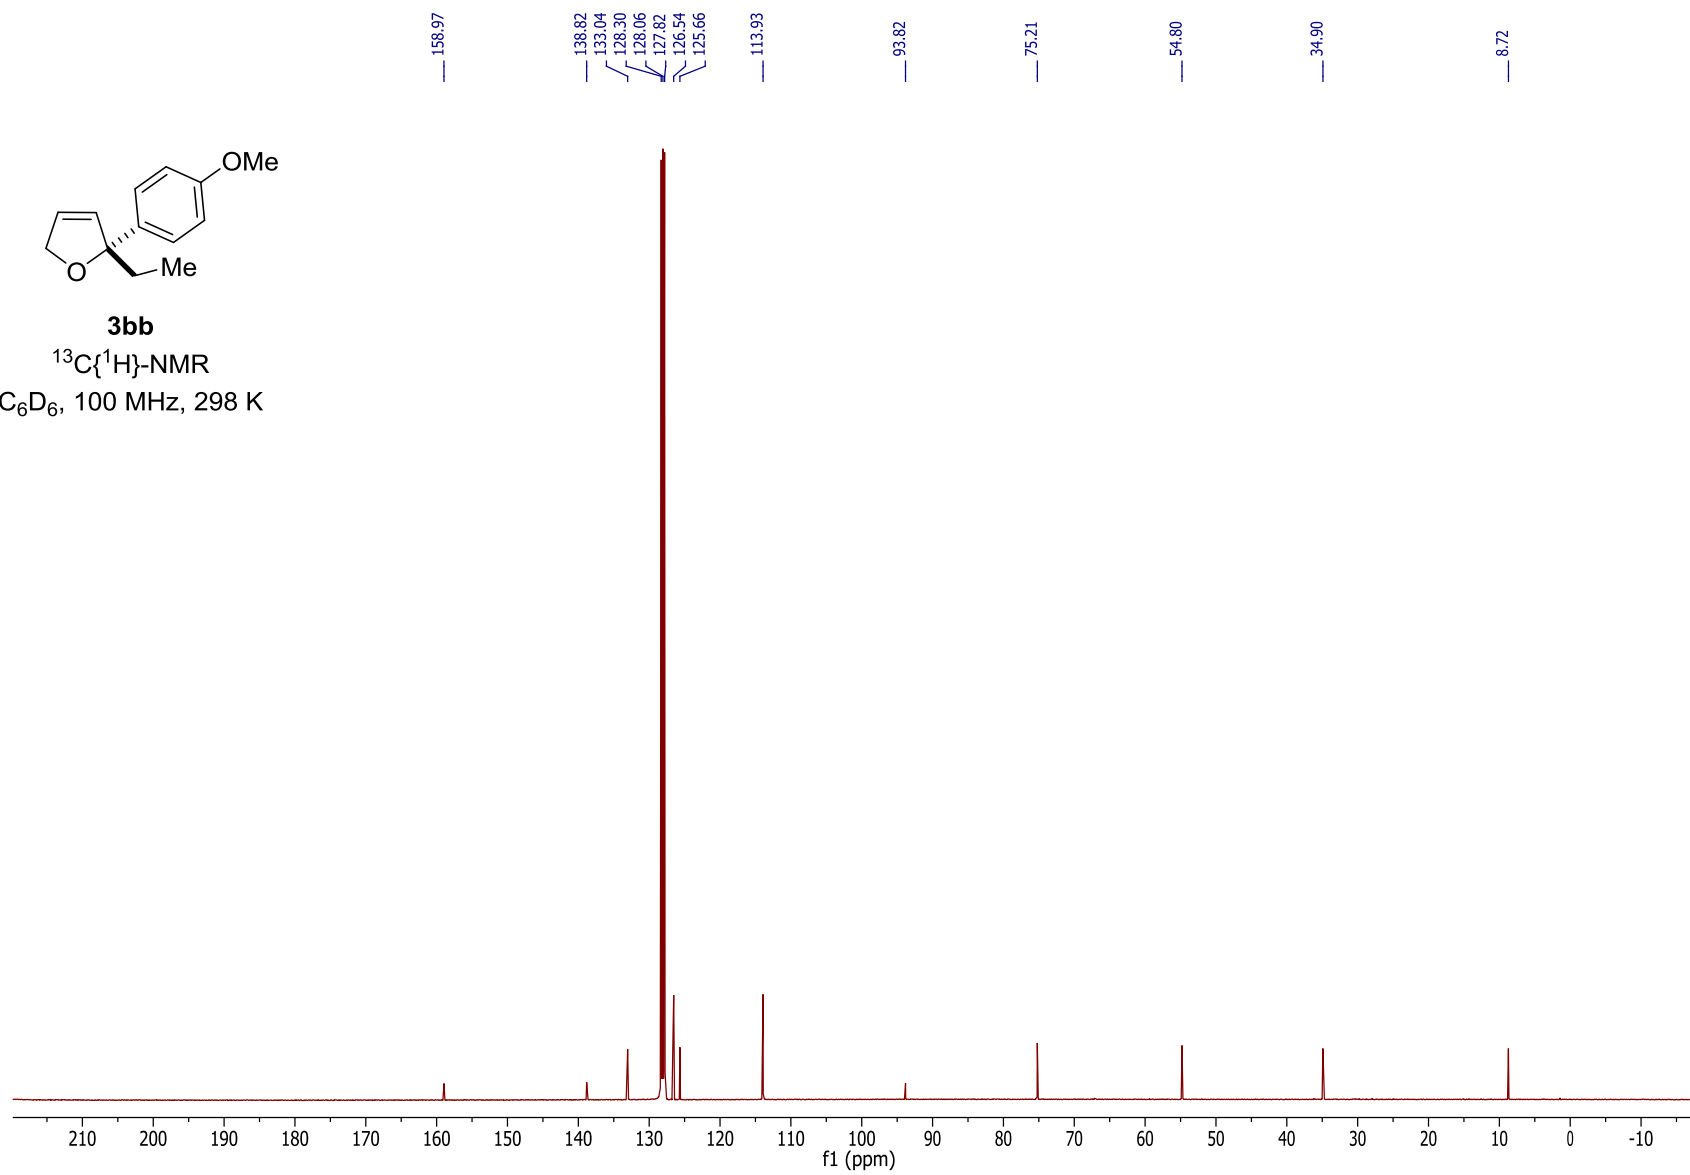

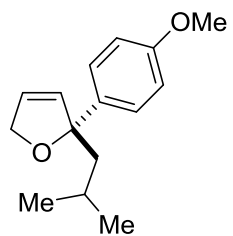**3cb**<sup>1</sup>H-NMRC<sub>6</sub>D<sub>6</sub>, 500 MHz, 298 K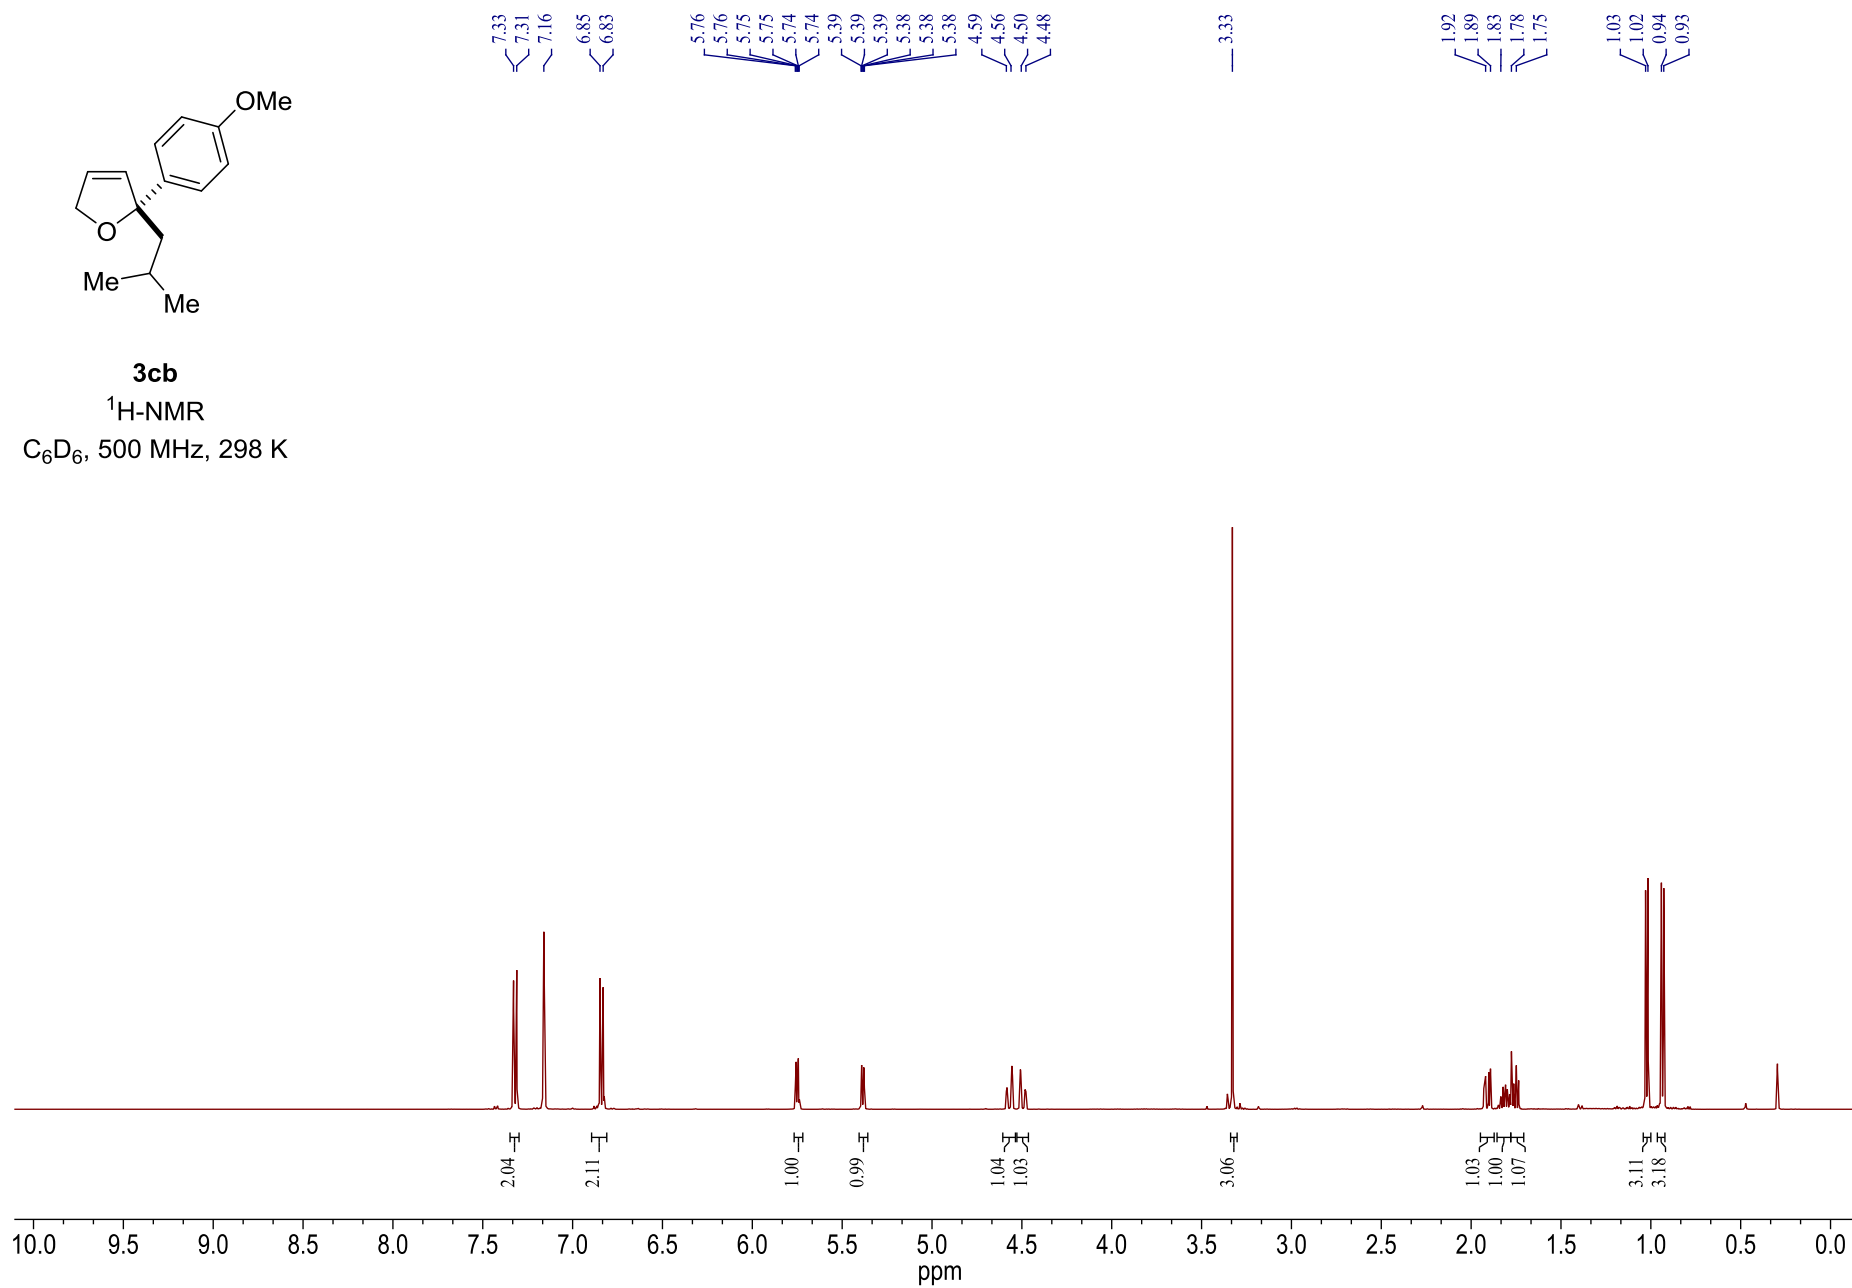

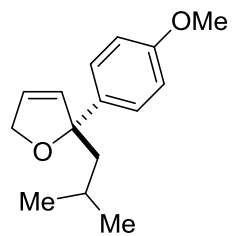**3b**

<sup>13</sup>C{<sup>1</sup>H}-NMR  
C<sub>6</sub>D<sub>6</sub>, 125 MHz, 298 K

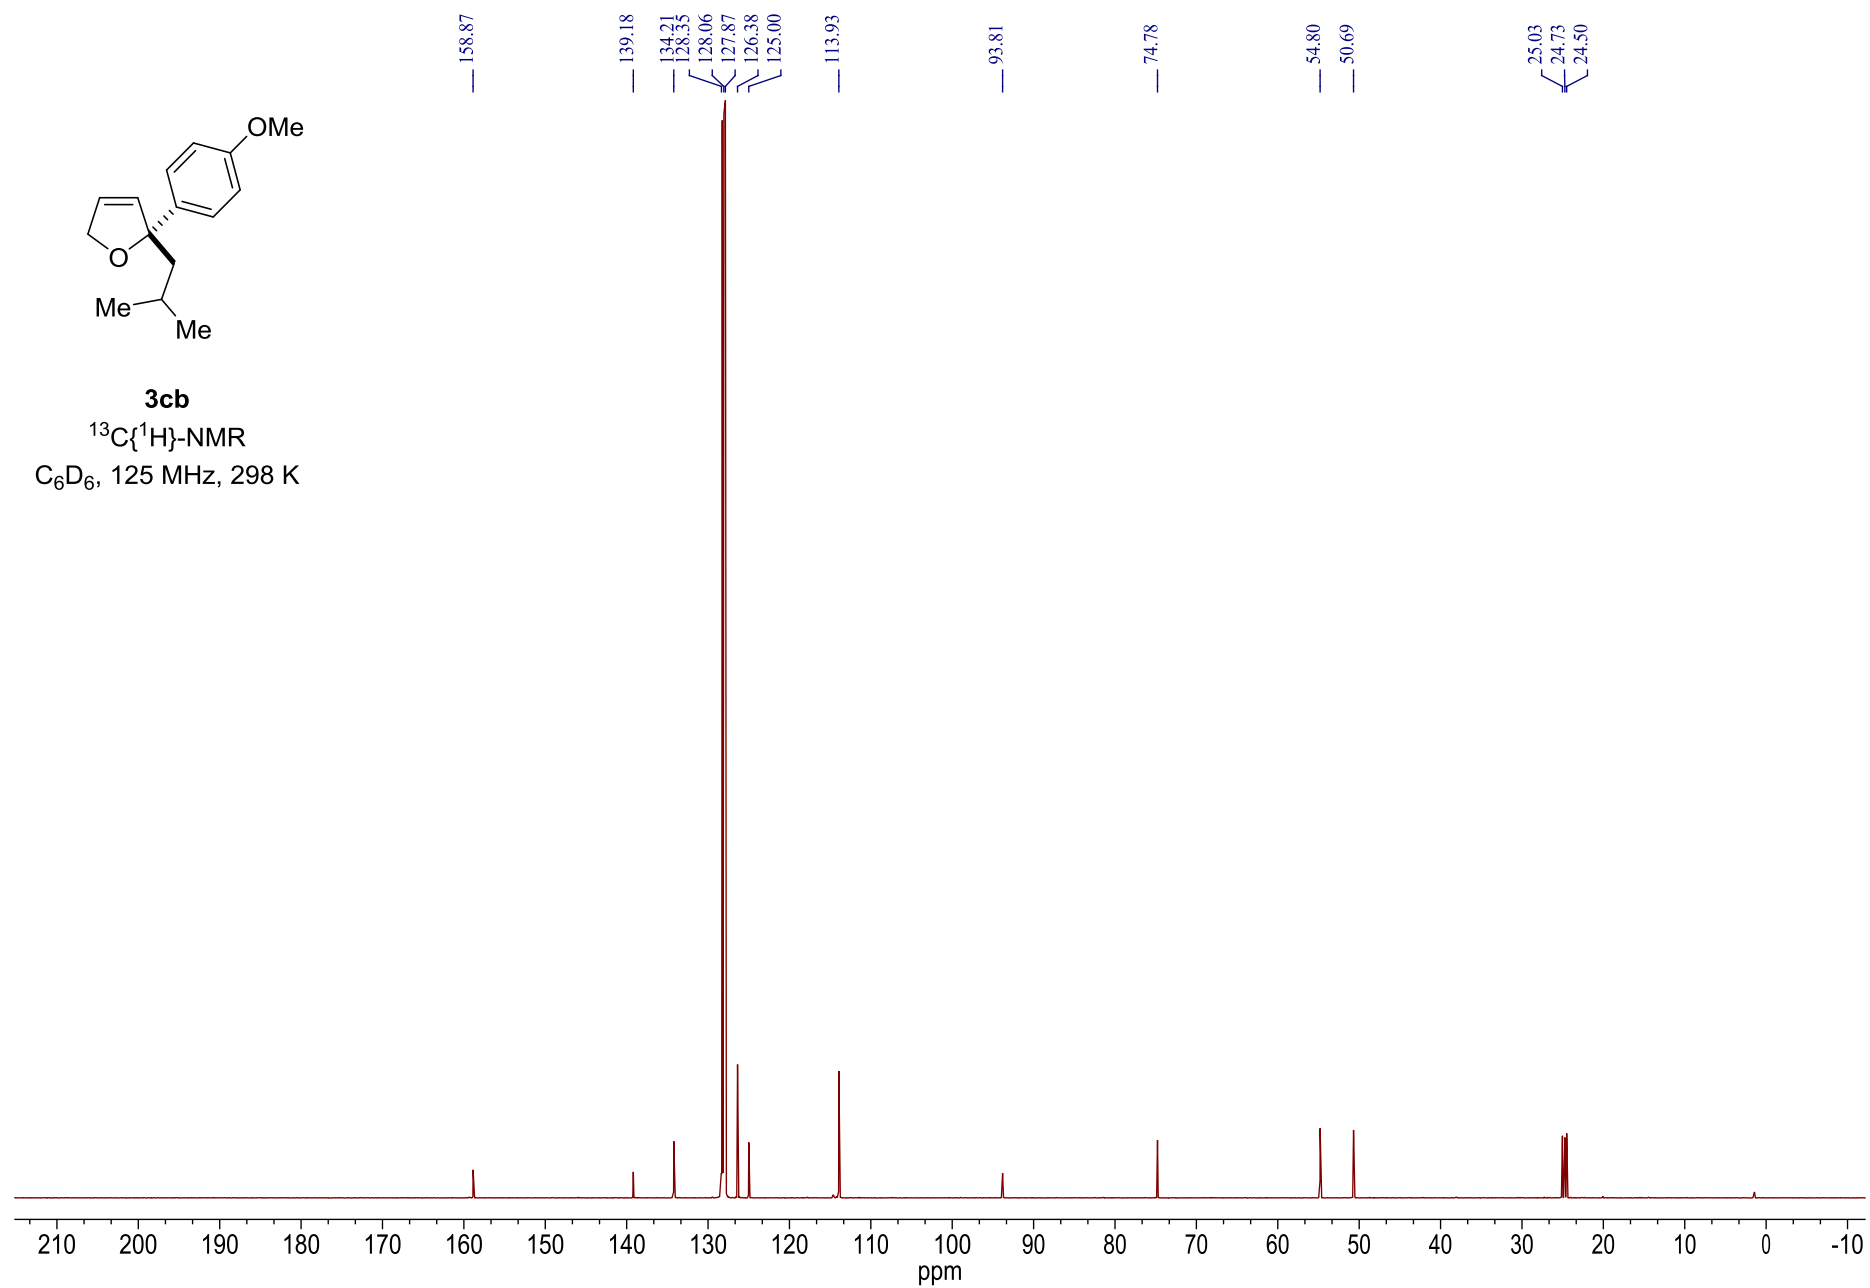



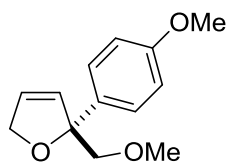**3db**<sup>1</sup>H-NMRC<sub>6</sub>D<sub>6</sub>, 400 MHz, 298 K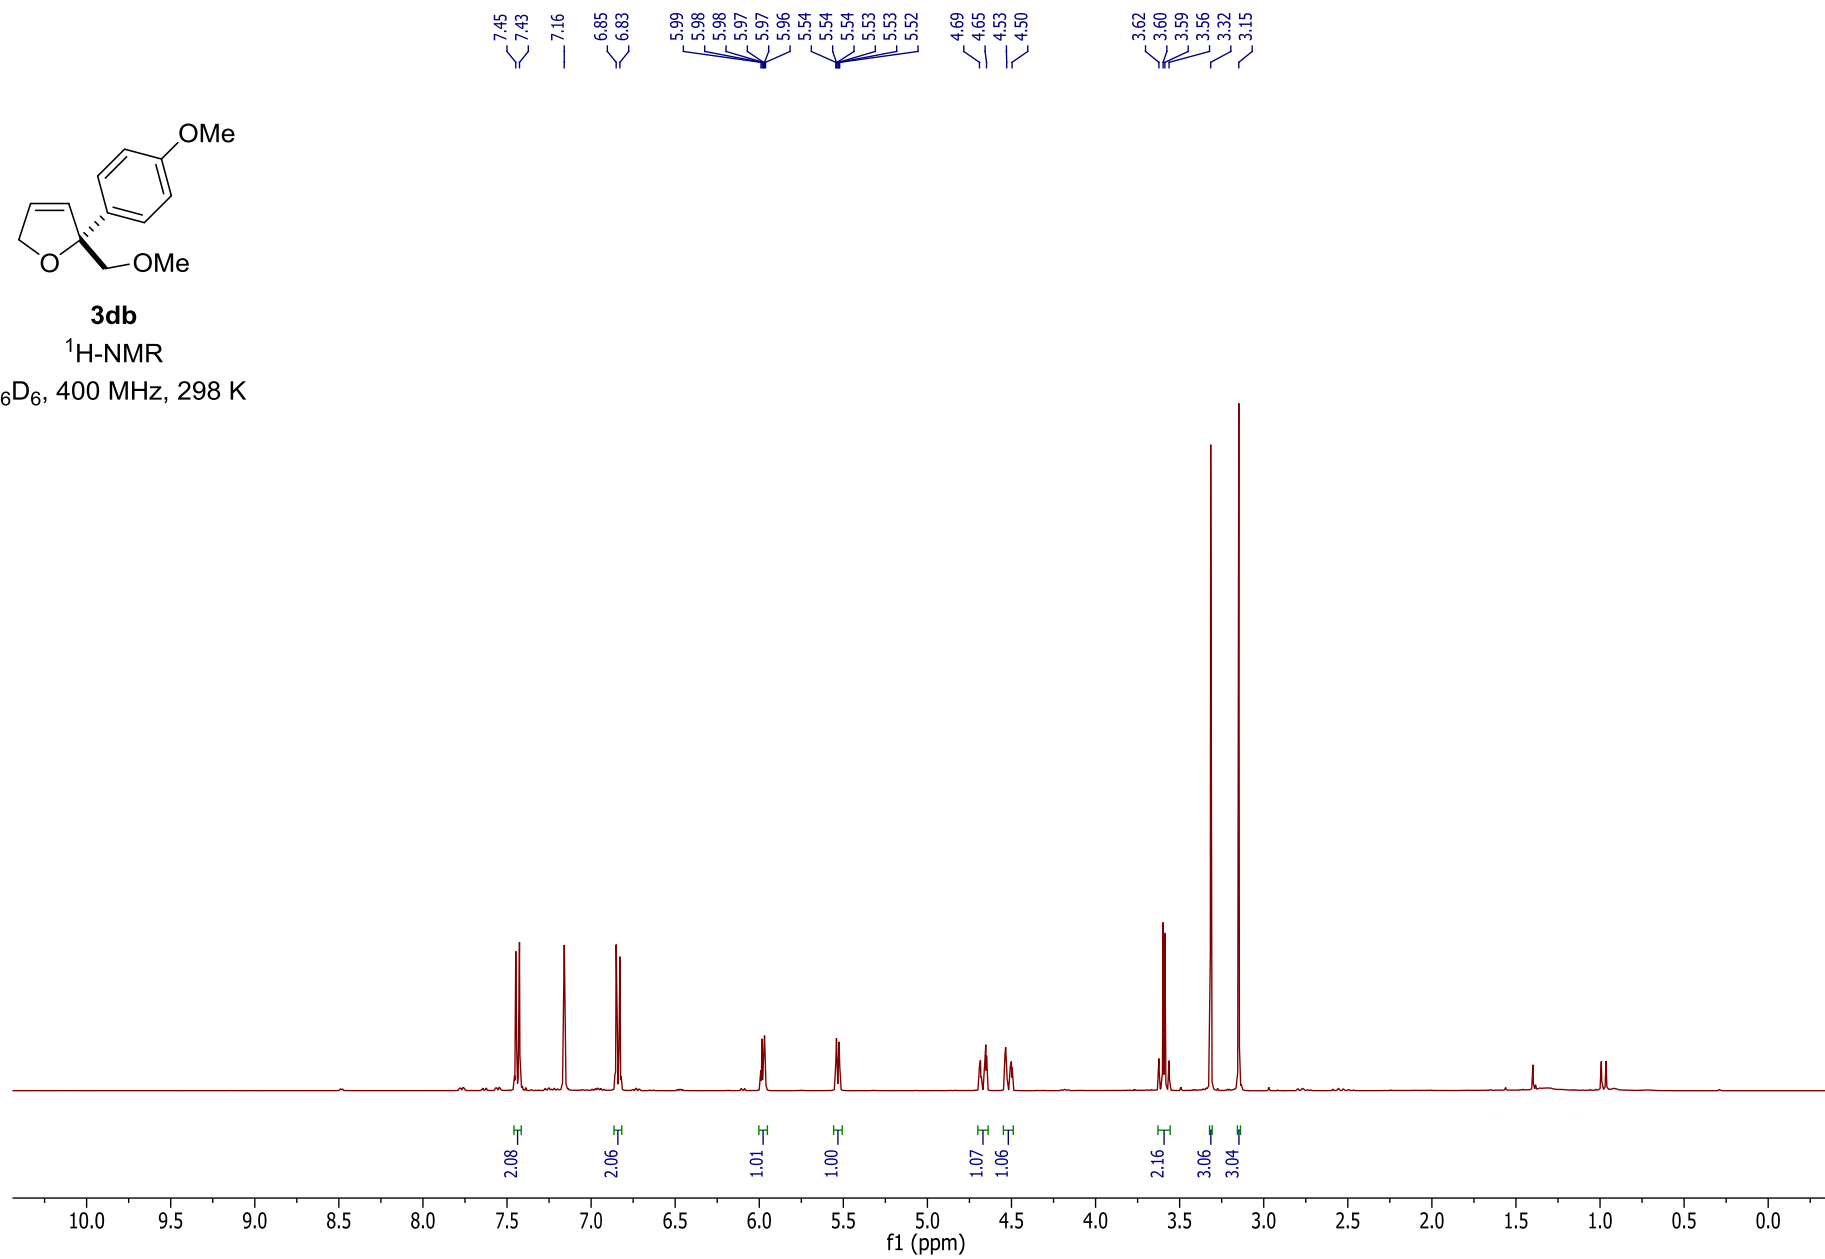

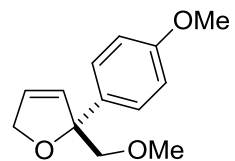**3db**

$^{13}\text{C}\{^1\text{H}\}$ -NMR  
 $\text{C}_6\text{D}_6$ , 100 MHz, 298 K

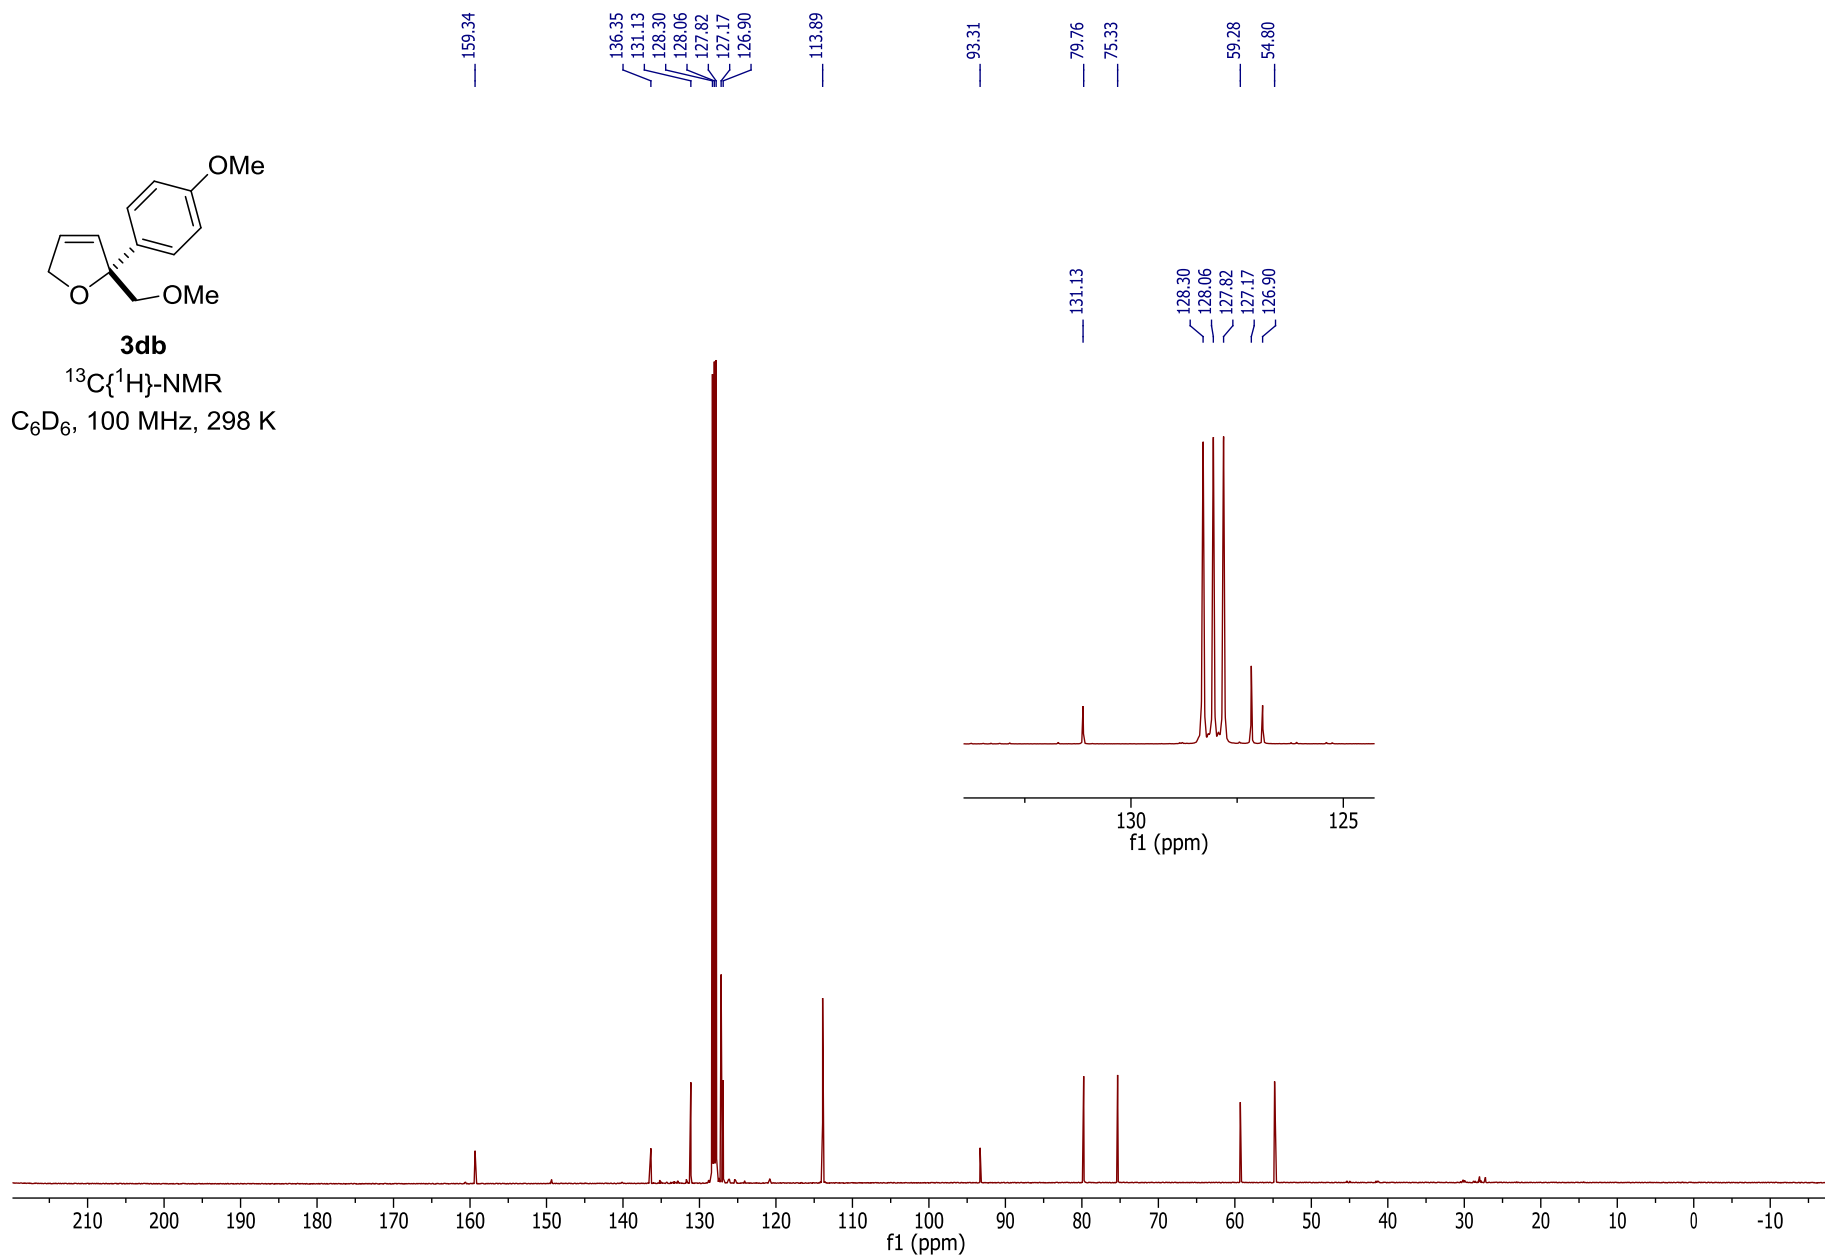

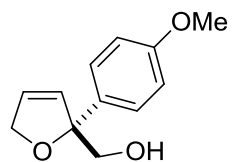**3b**<sup>1</sup>H-NMRC<sub>6</sub>D<sub>6</sub>, 400 MHz, 298 K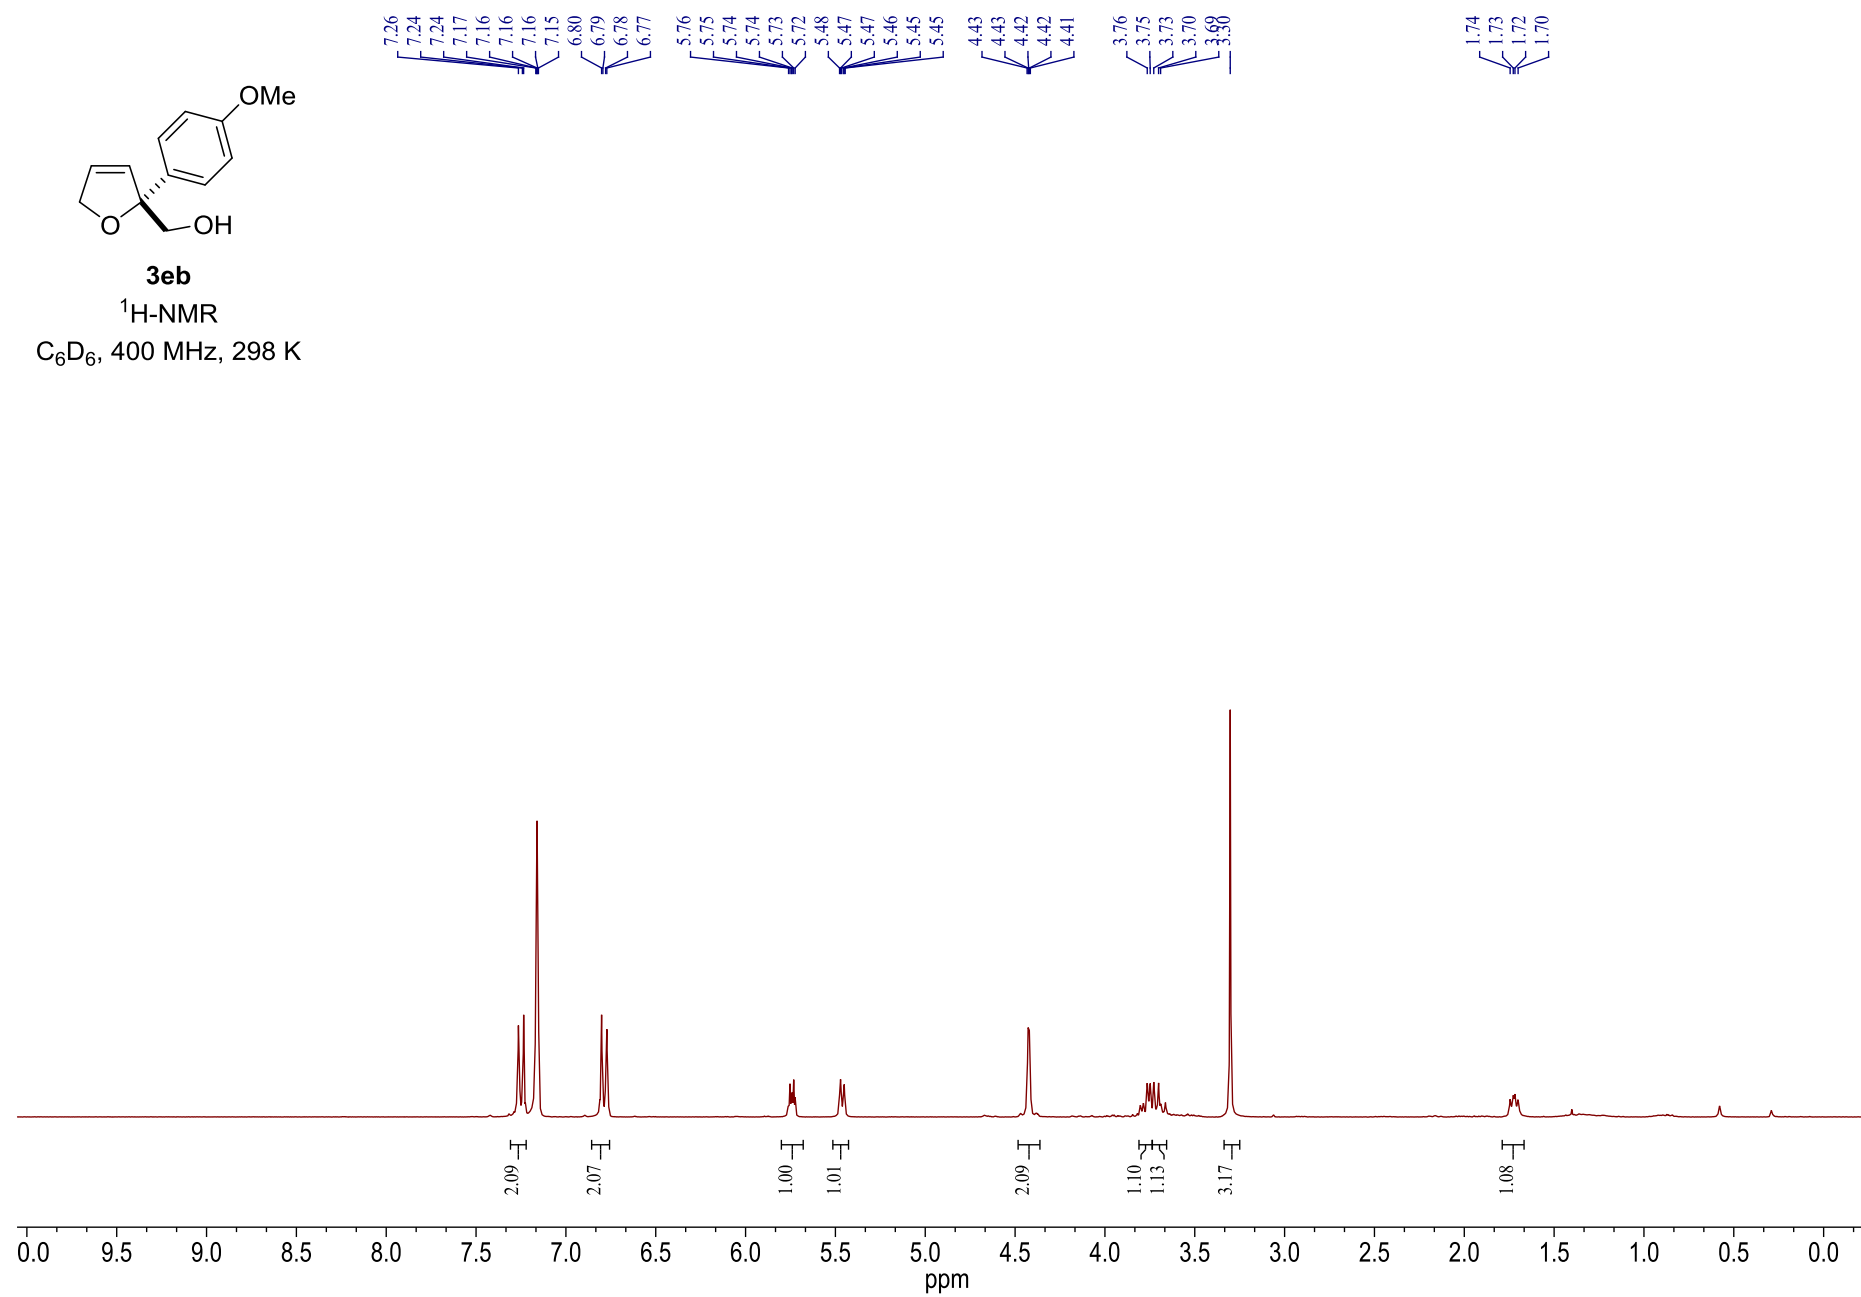

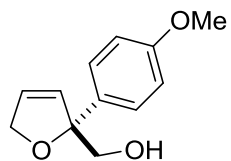**3b**

$^{13}\text{C}\{^1\text{H}\}$ -NMR  
 $\text{C}_6\text{D}_6$ , 100 MHz, 298 K

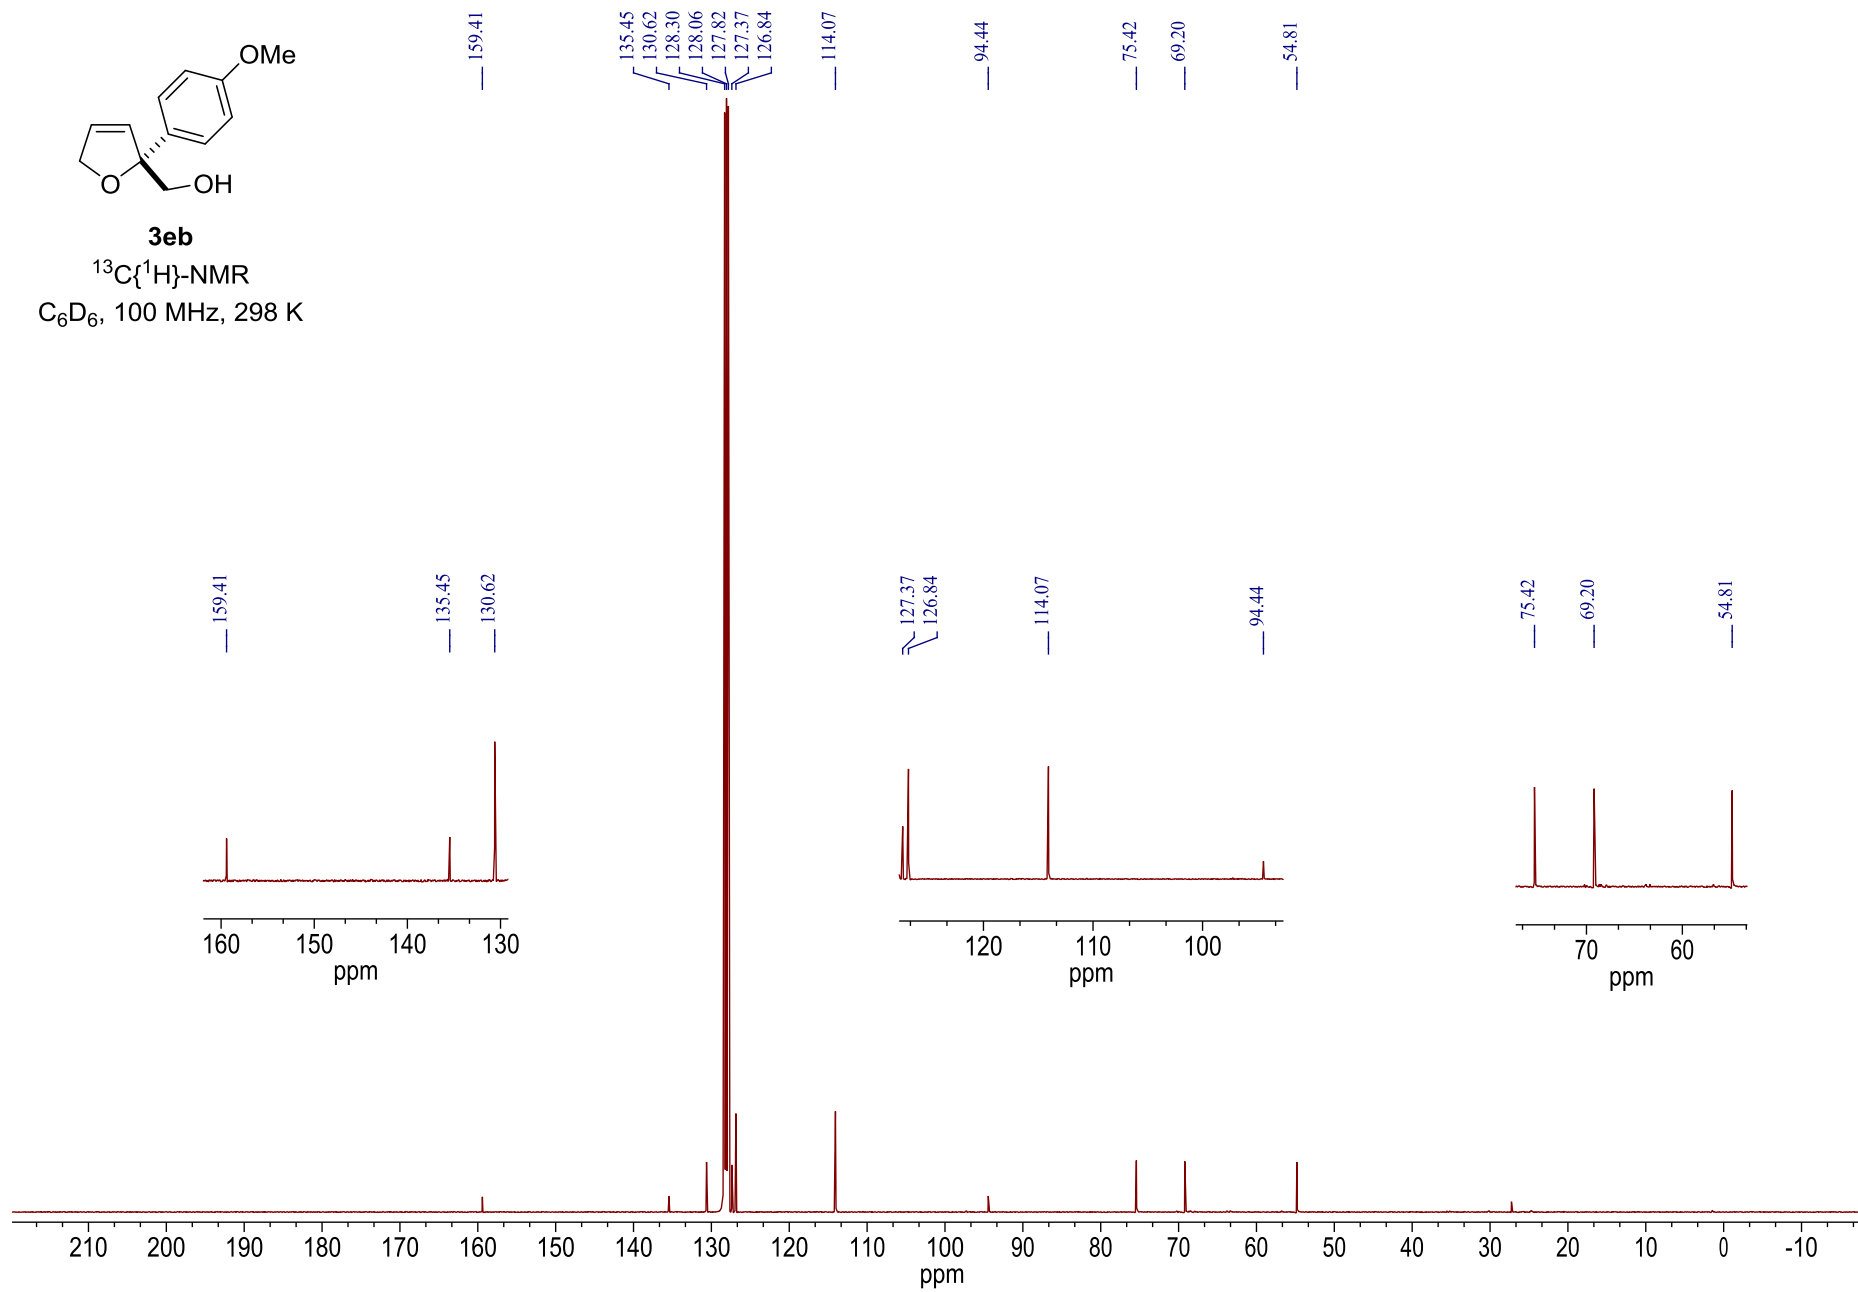

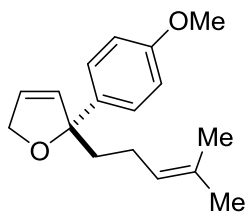**3fb**<sup>1</sup>H-NMRC<sub>6</sub>D<sub>6</sub>, 400 MHz, 298 K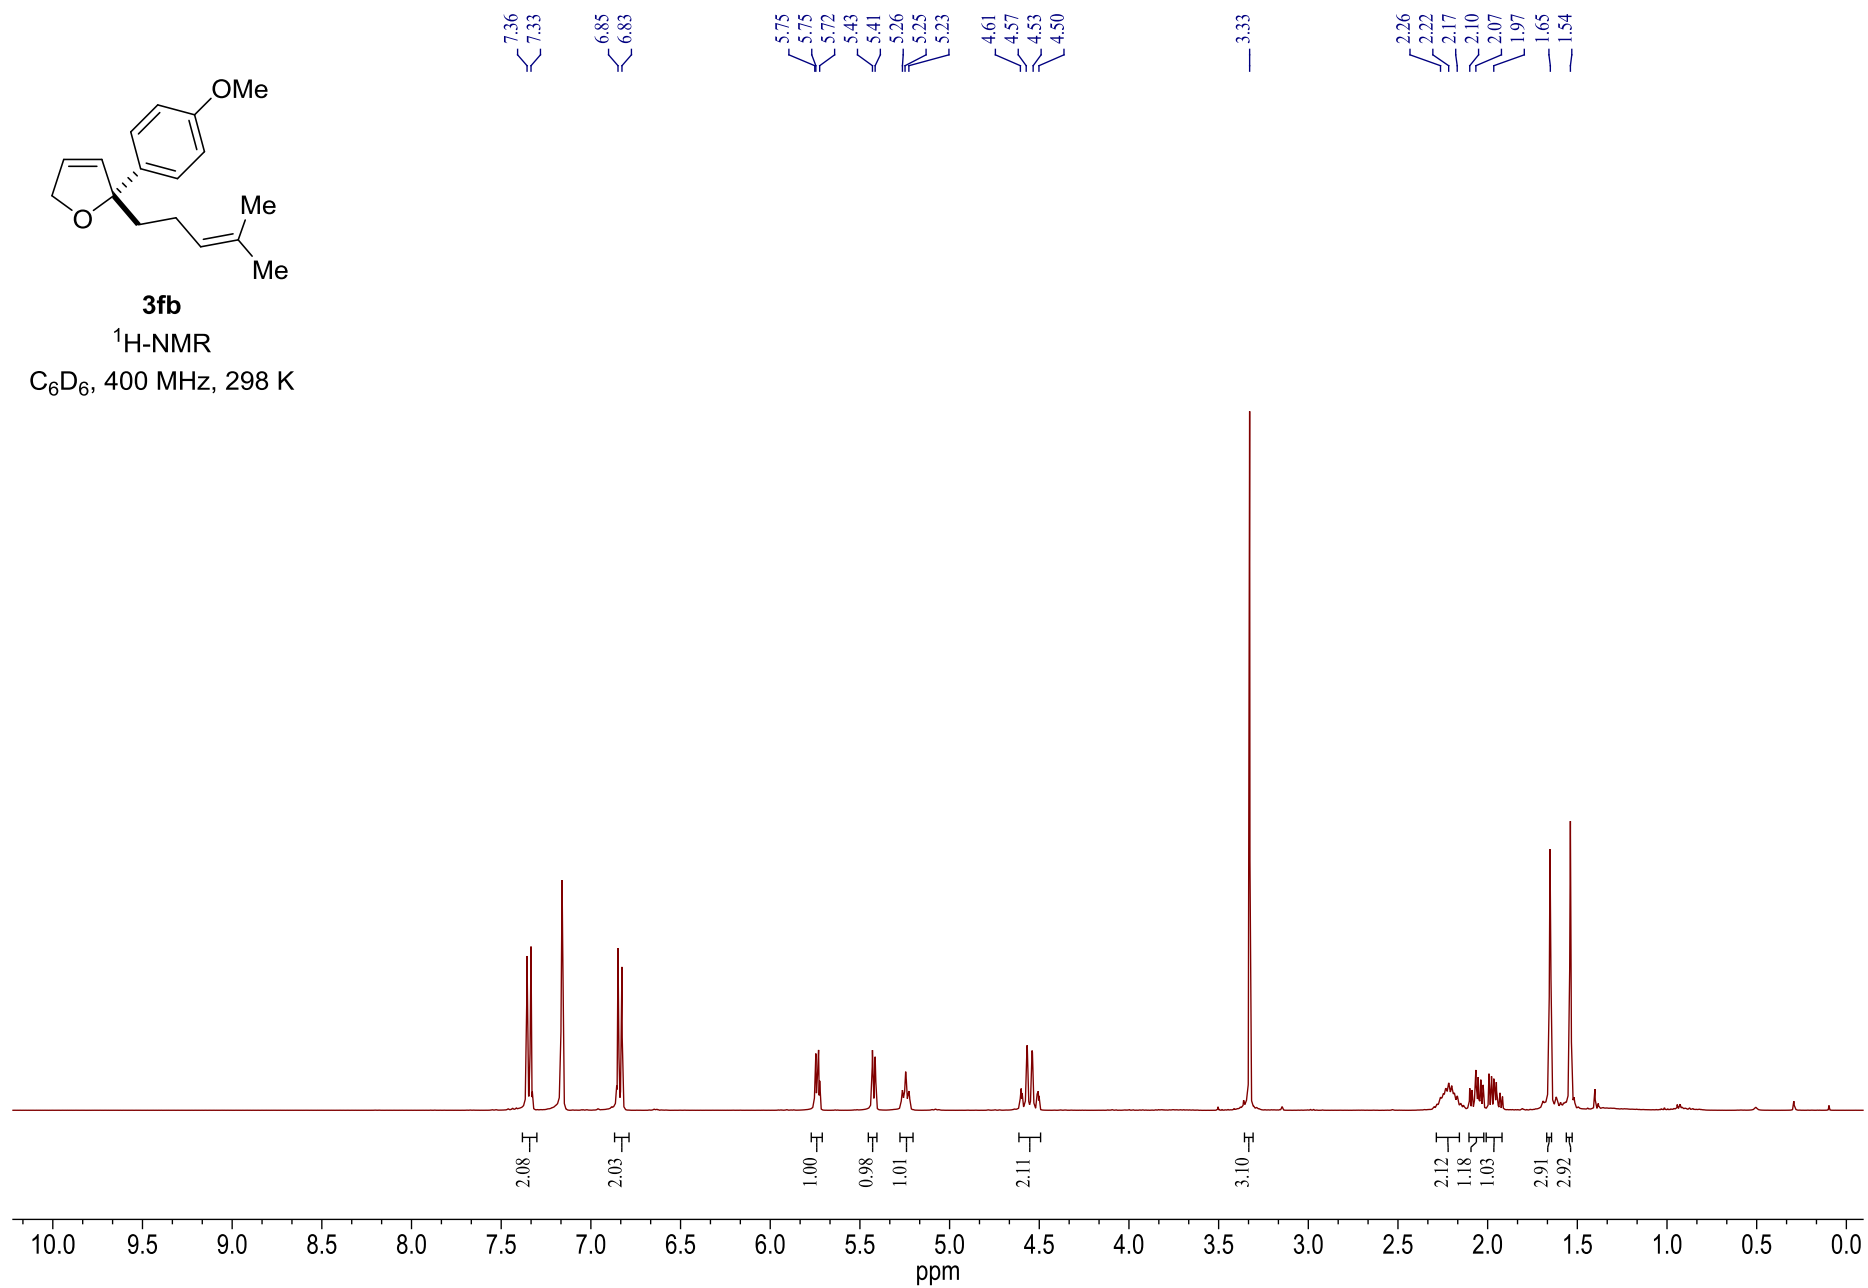

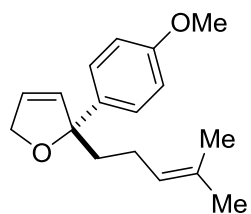**3b**

$^{13}\text{C}\{^1\text{H}\}$ -NMR  
 $\text{C}_6\text{D}_6$ , 100 MHz, 298 K

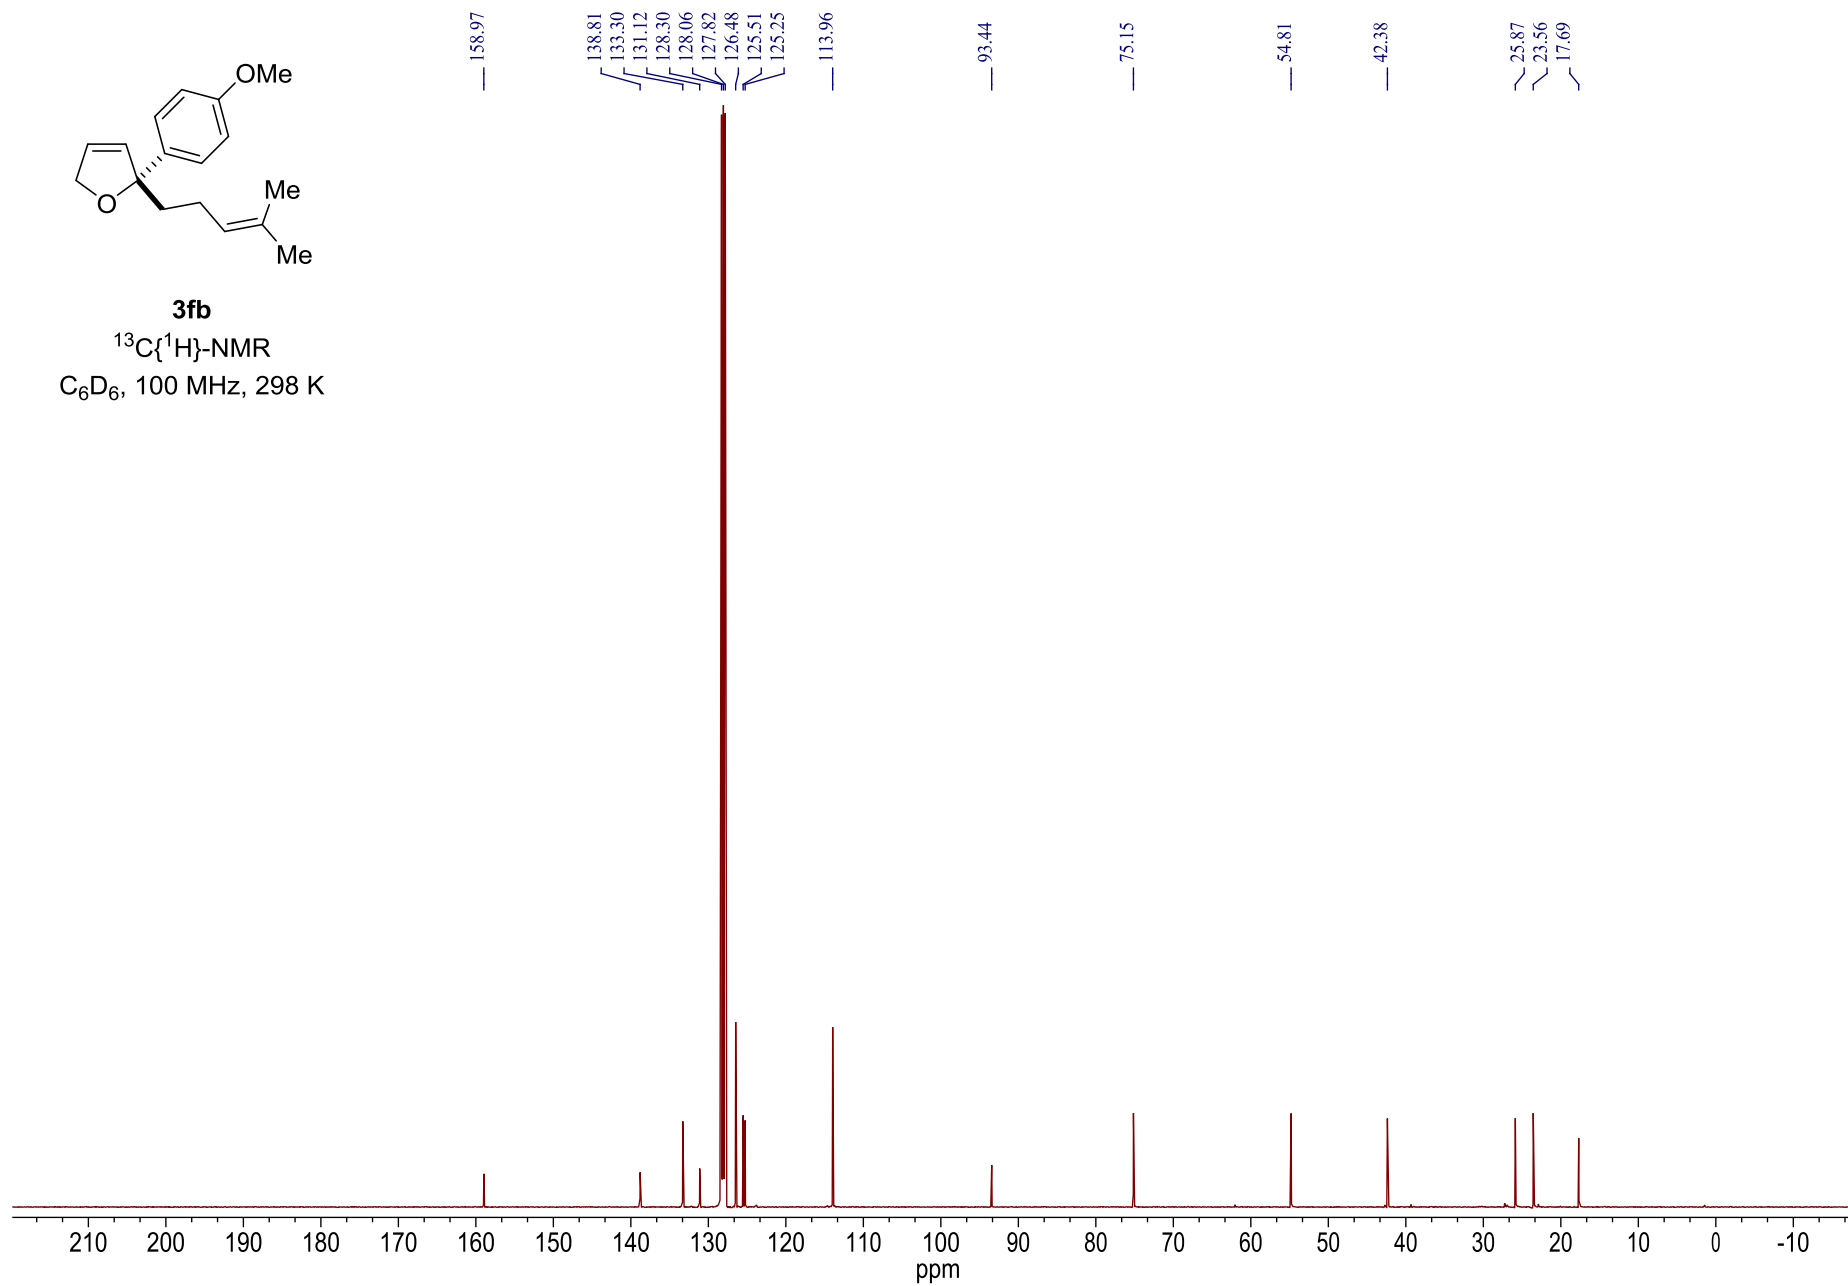

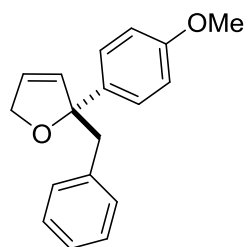**3gb**<sup>1</sup>H-NMRC<sub>6</sub>D<sub>6</sub>, 400 MHz, 298 K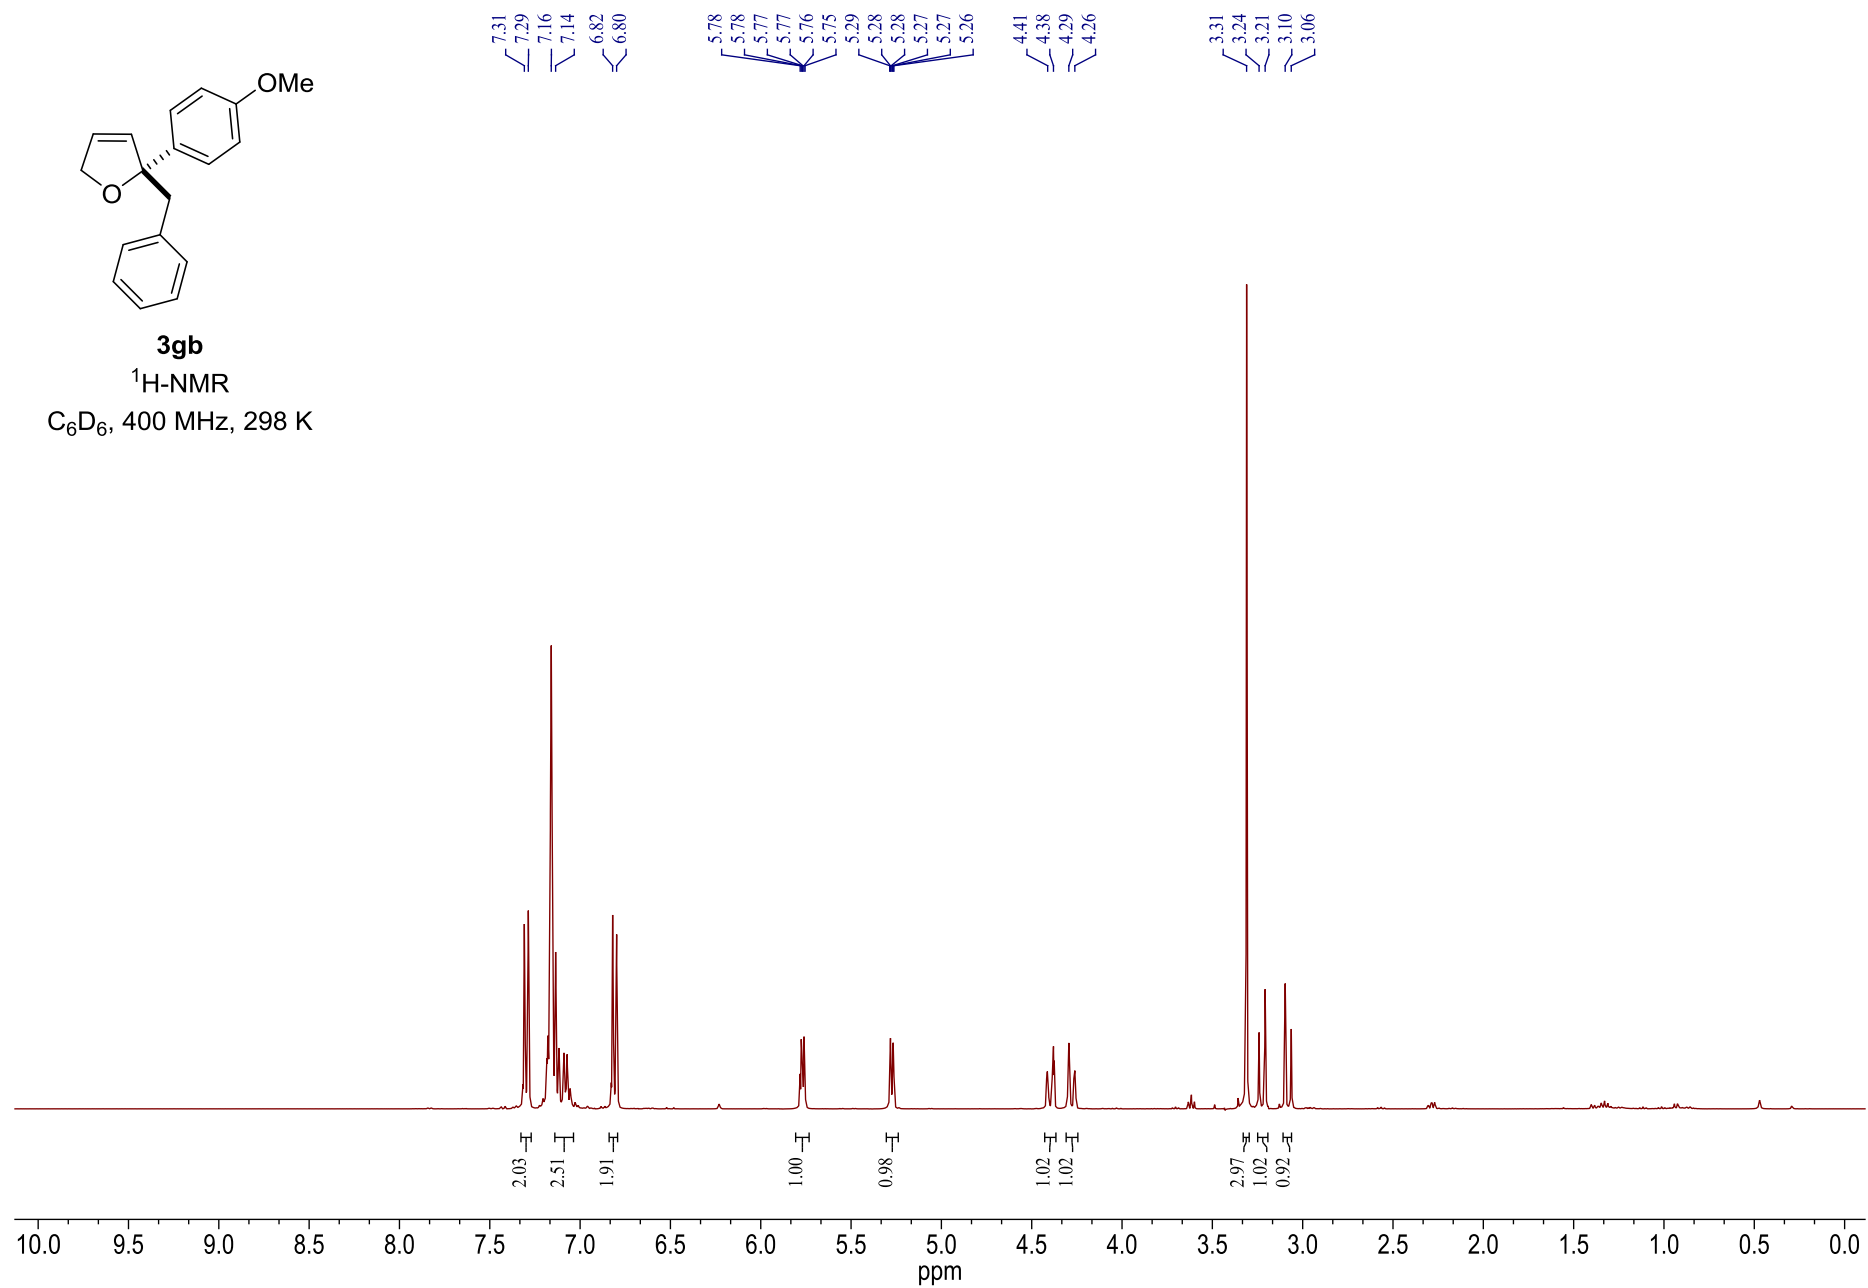

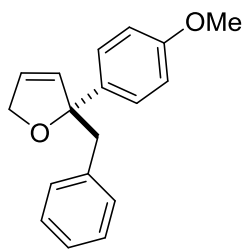**3gb**

$^{13}\text{C}\{^1\text{H}\}$ -NMR  
 $\text{C}_6\text{D}_6$ , 100 MHz, 298 K

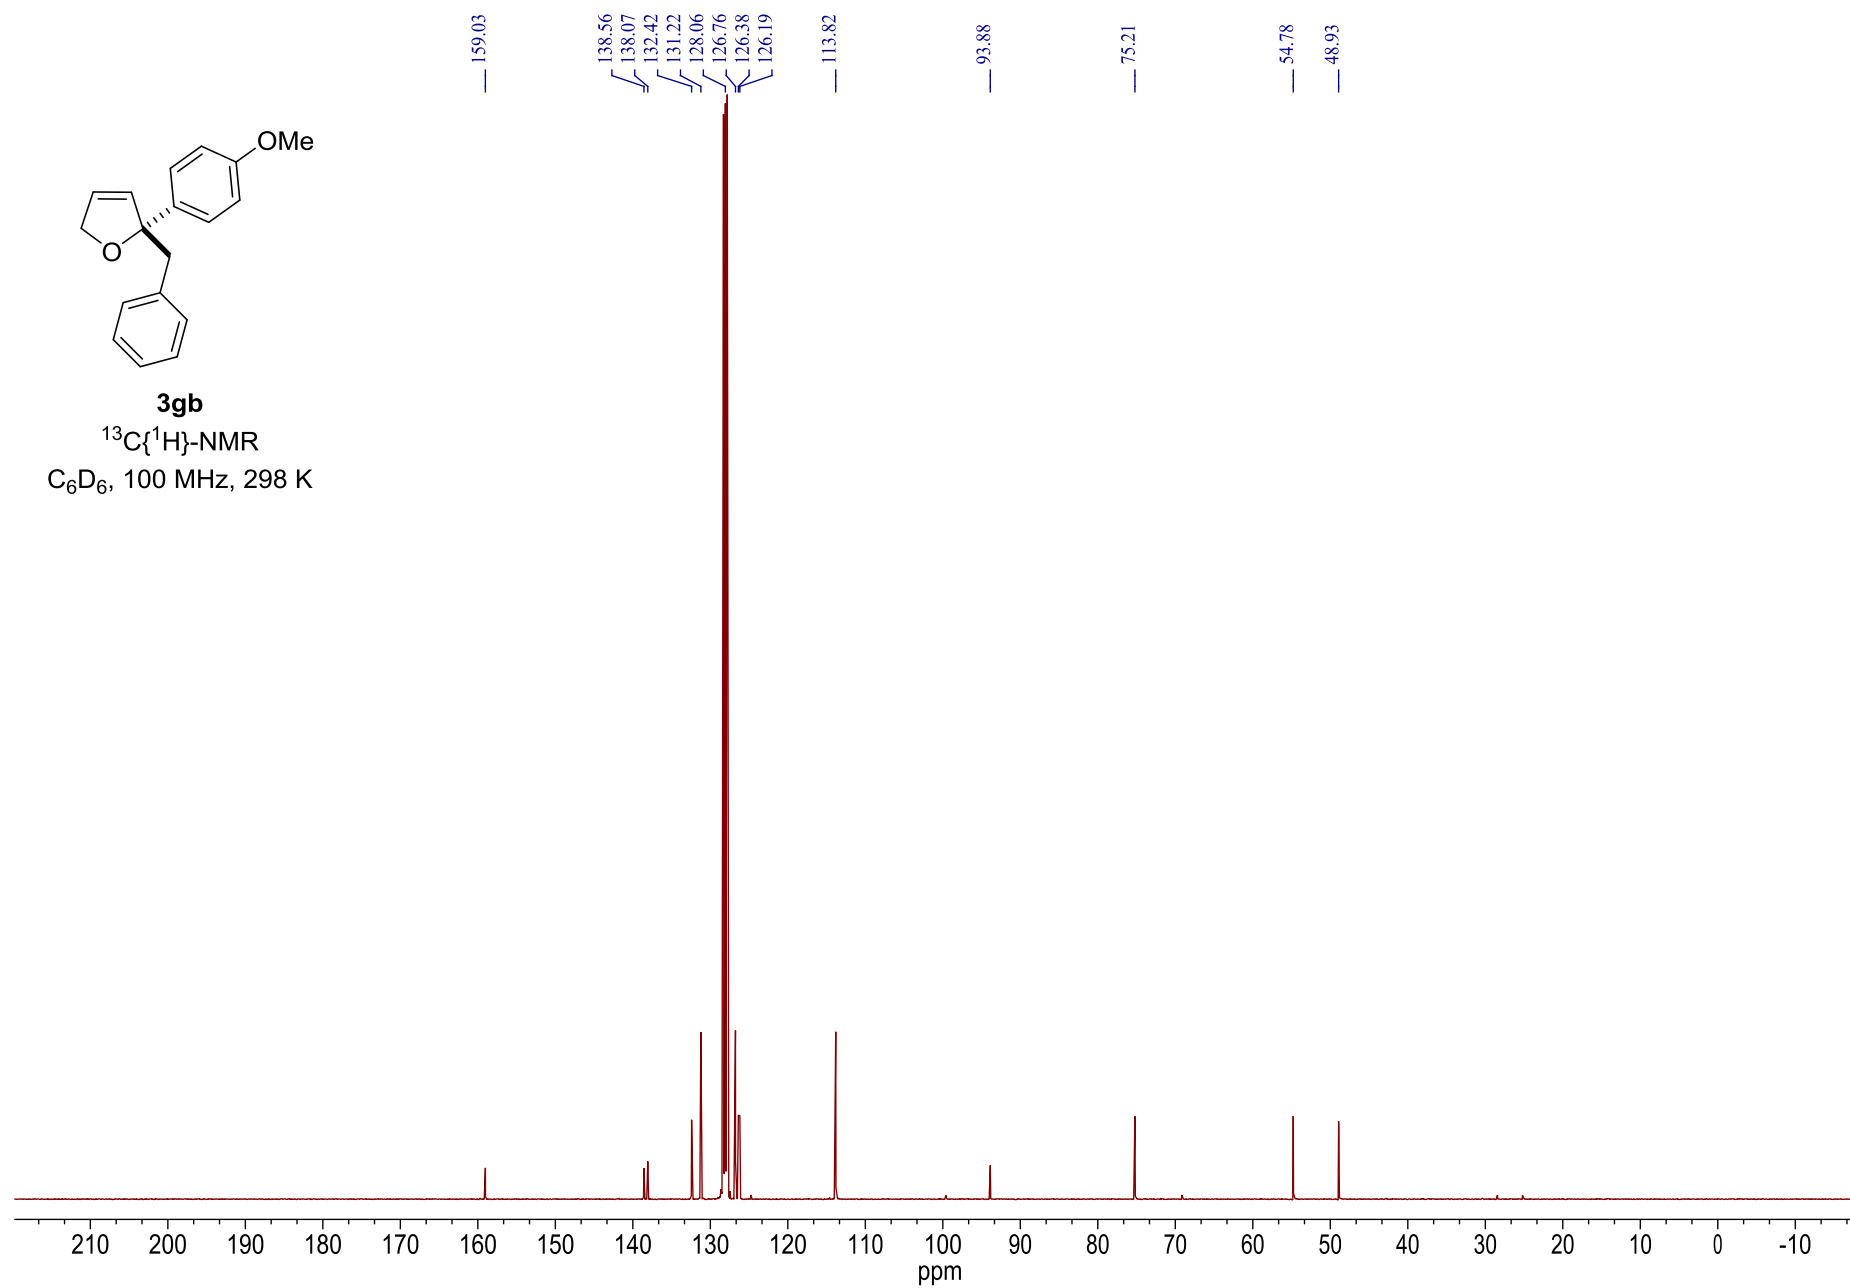



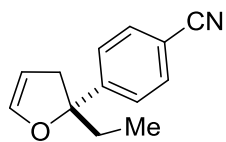**4bc**

$^{13}\text{C}\{^1\text{H}\}$ -NMR  
 $\text{C}_6\text{D}_6$ , 100 MHz, 298 K

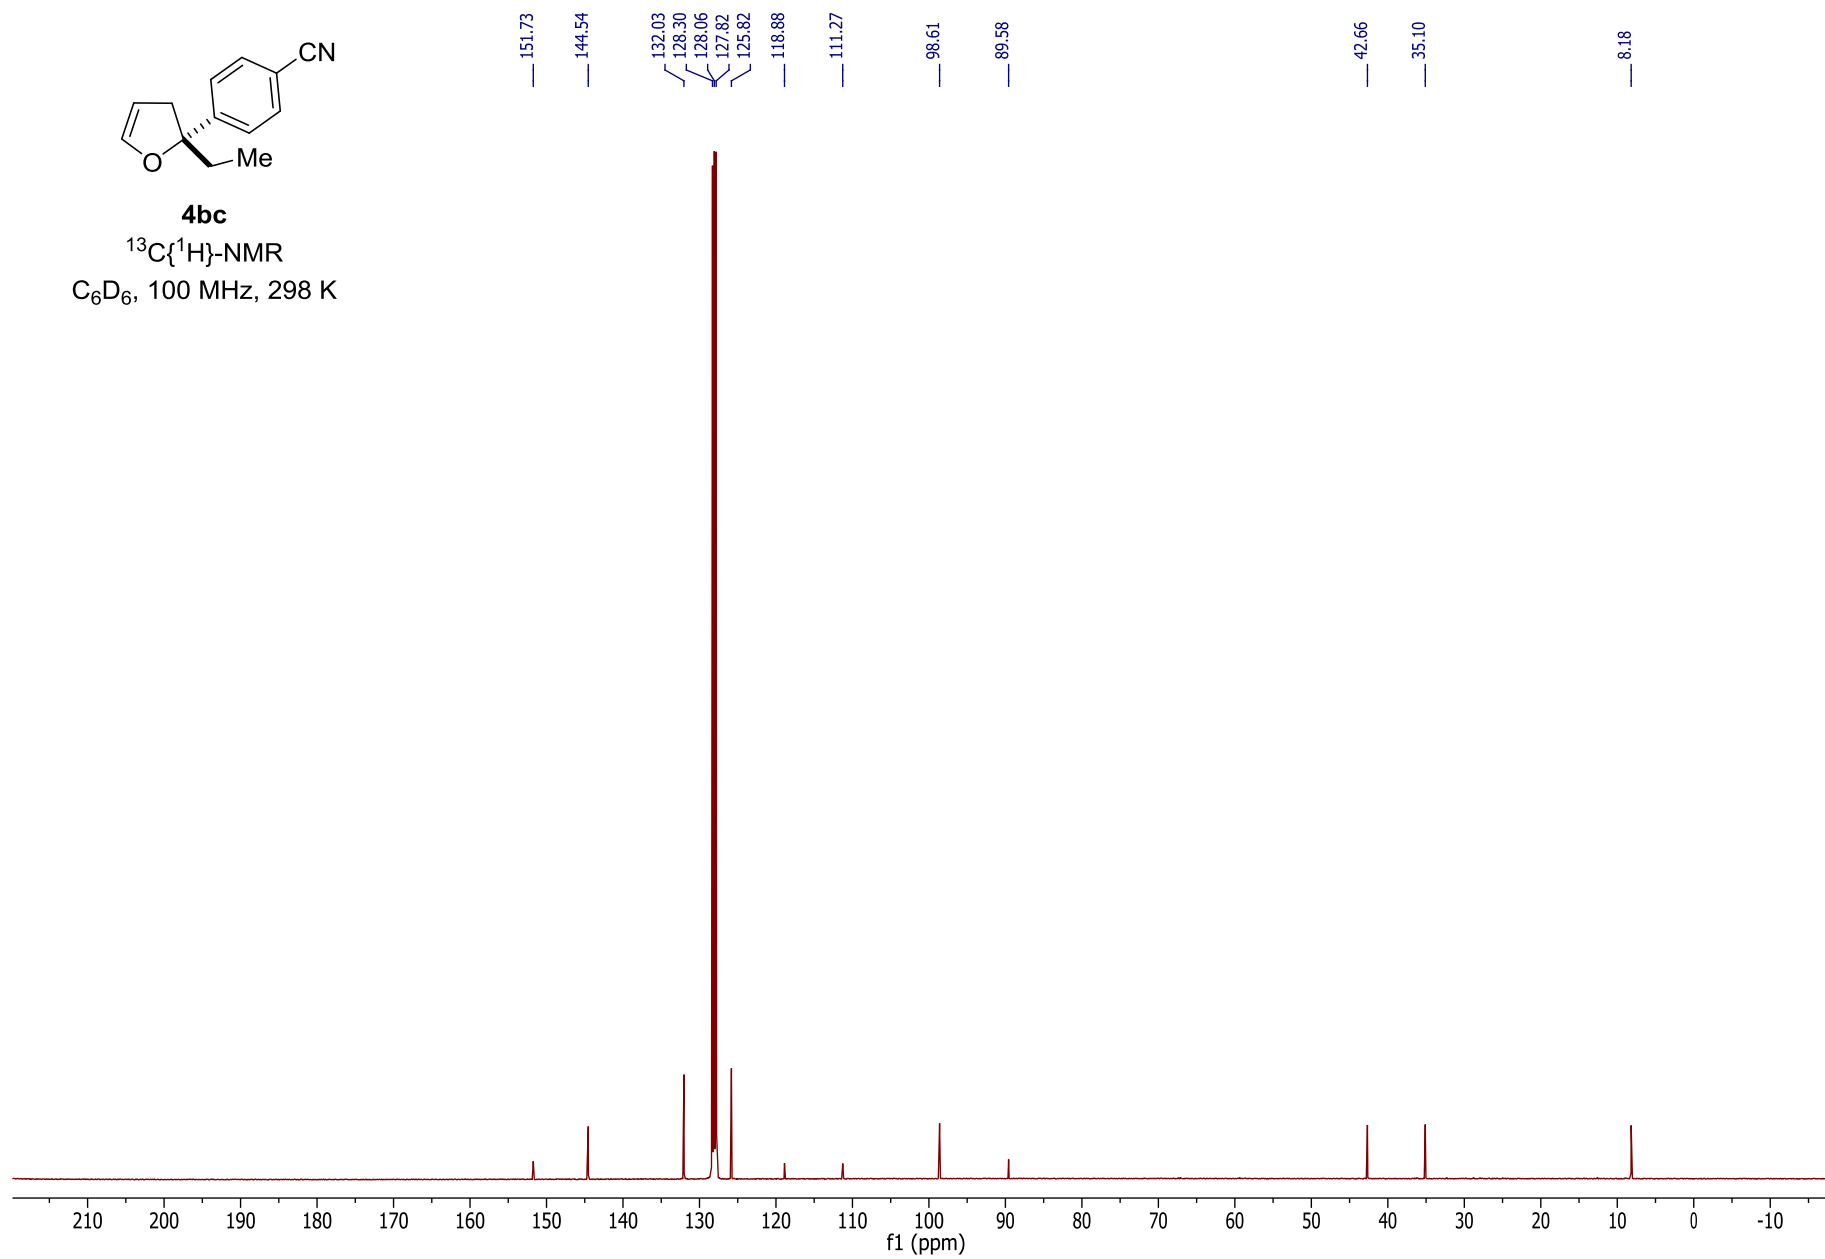

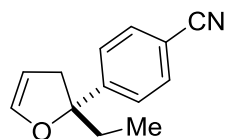**4bc**<sup>1</sup>H-NMRC<sub>6</sub>D<sub>6</sub>, 400 MHz, 298 K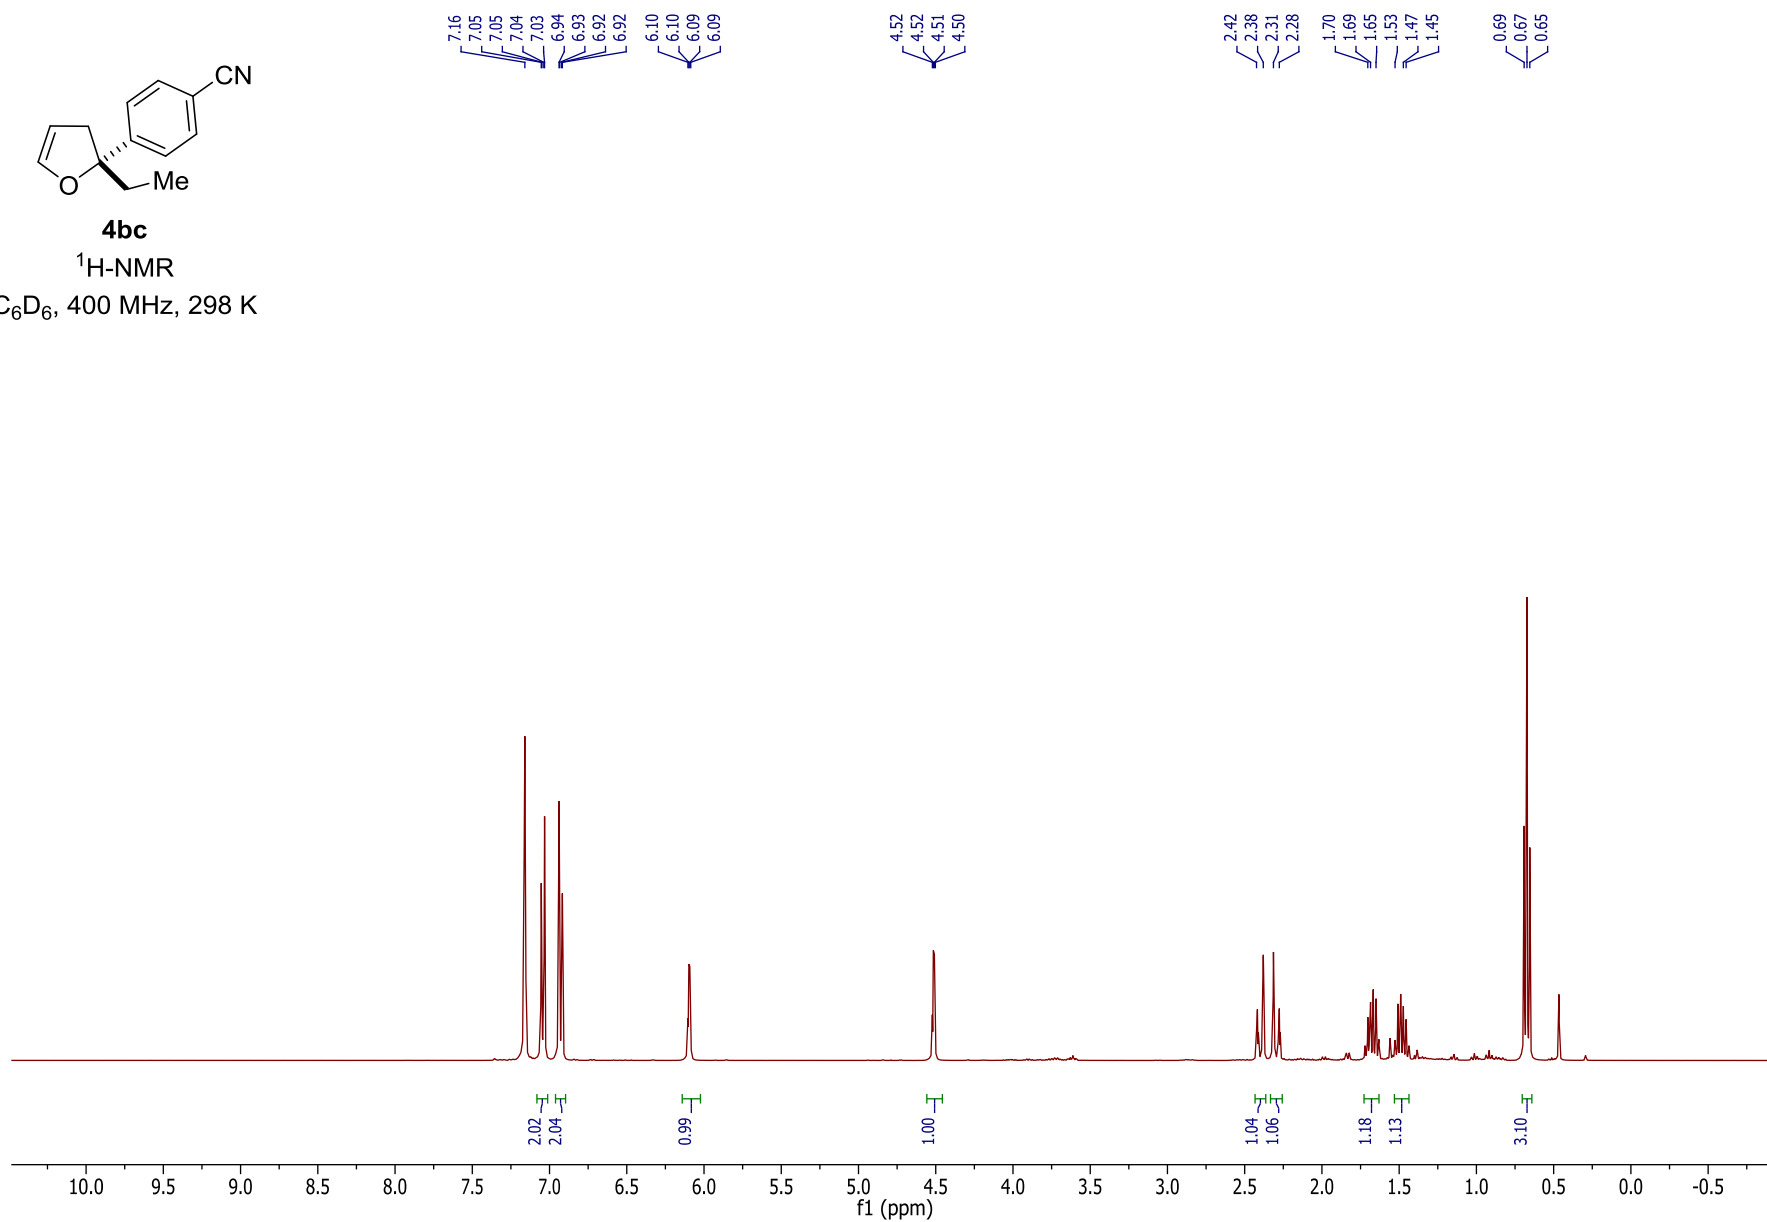

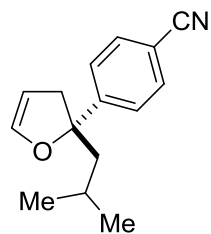**4cc** $^1\text{H-NMR}$  $\text{C}_6\text{D}_6$ , 400 MHz, 298 K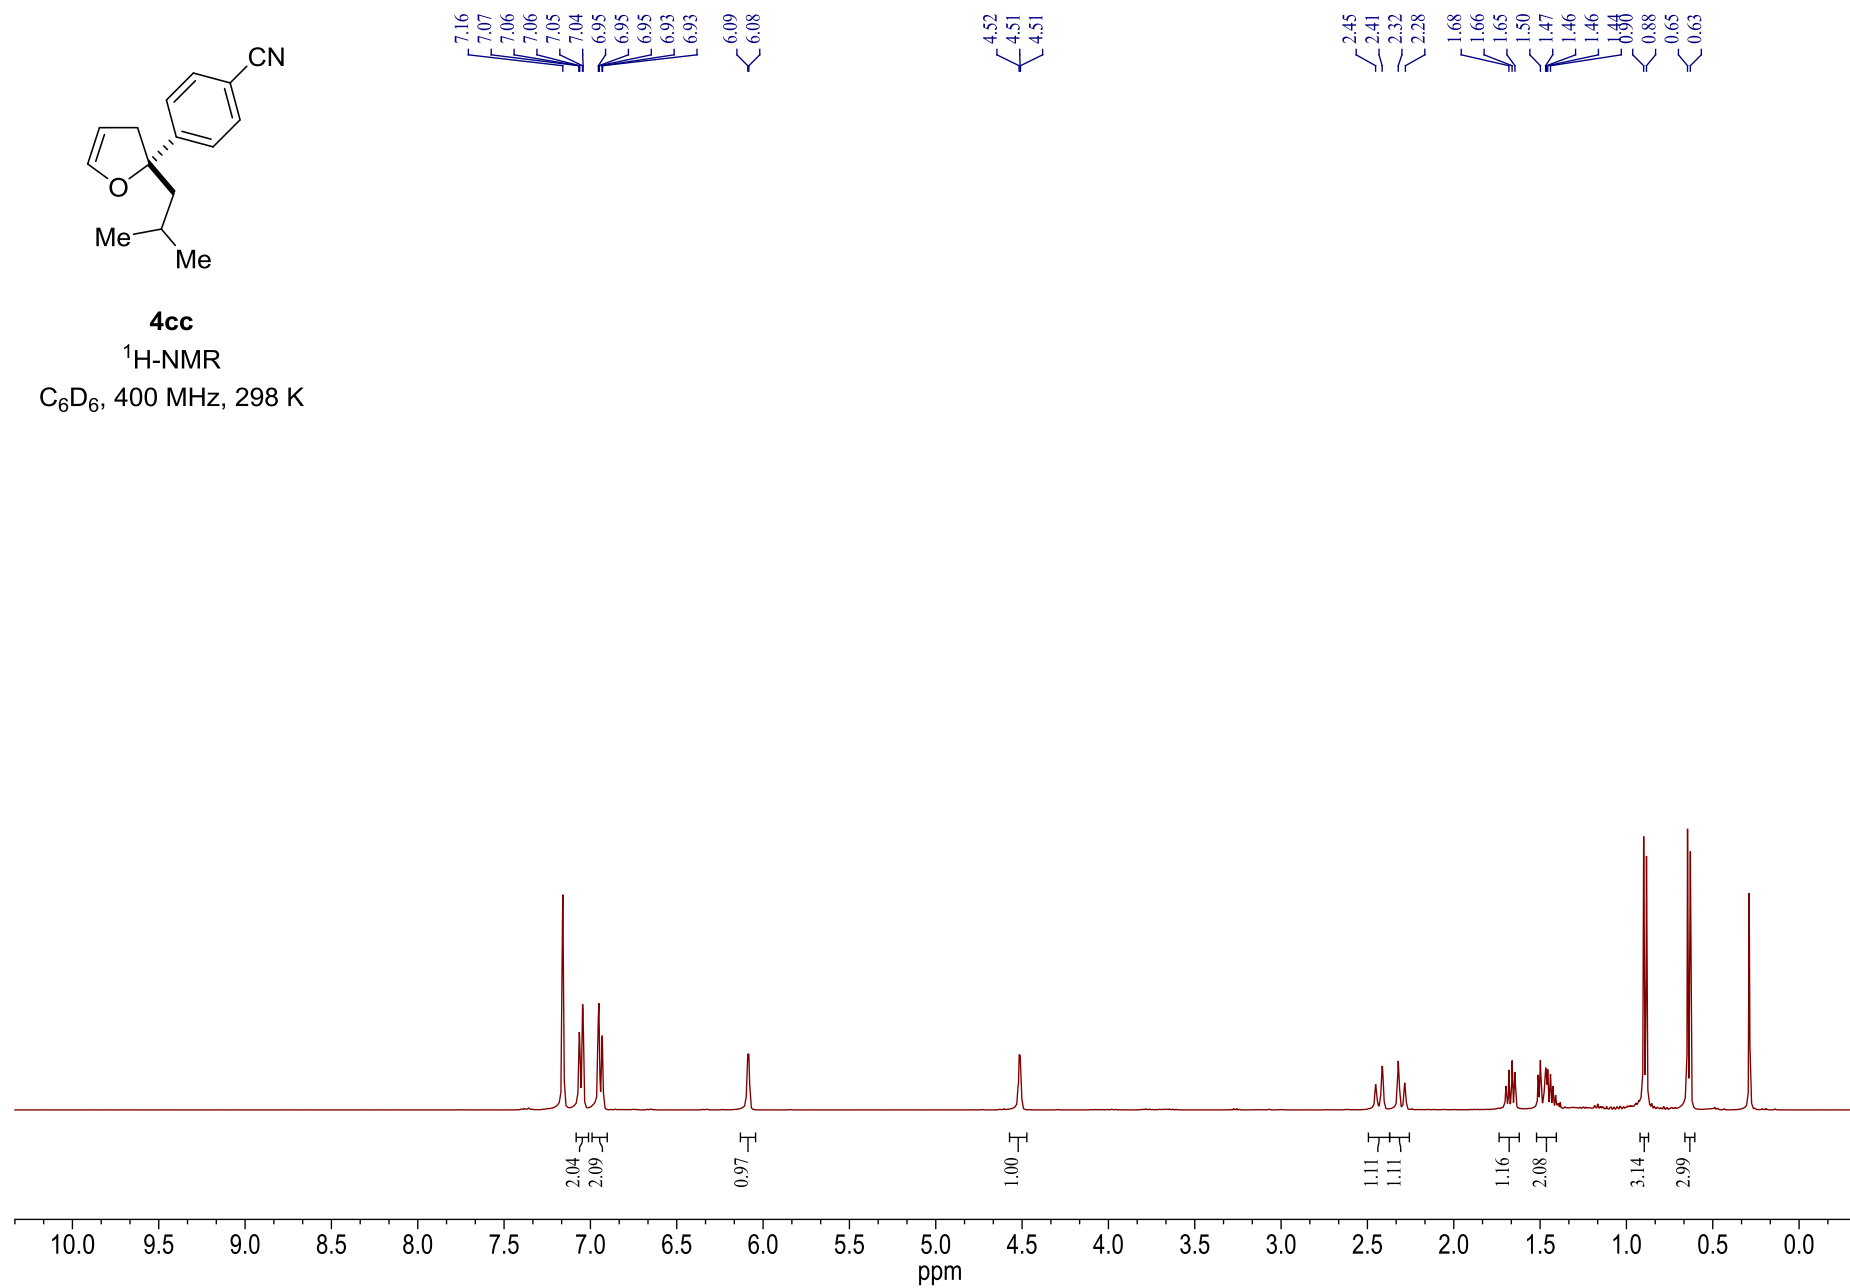

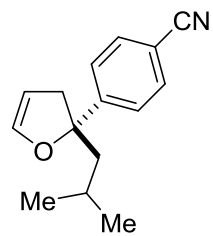**4cc**

$^{13}\text{C}\{^1\text{H}\}$ -NMR  
 $\text{C}_6\text{D}_6$ , 100 MHz, 298 K

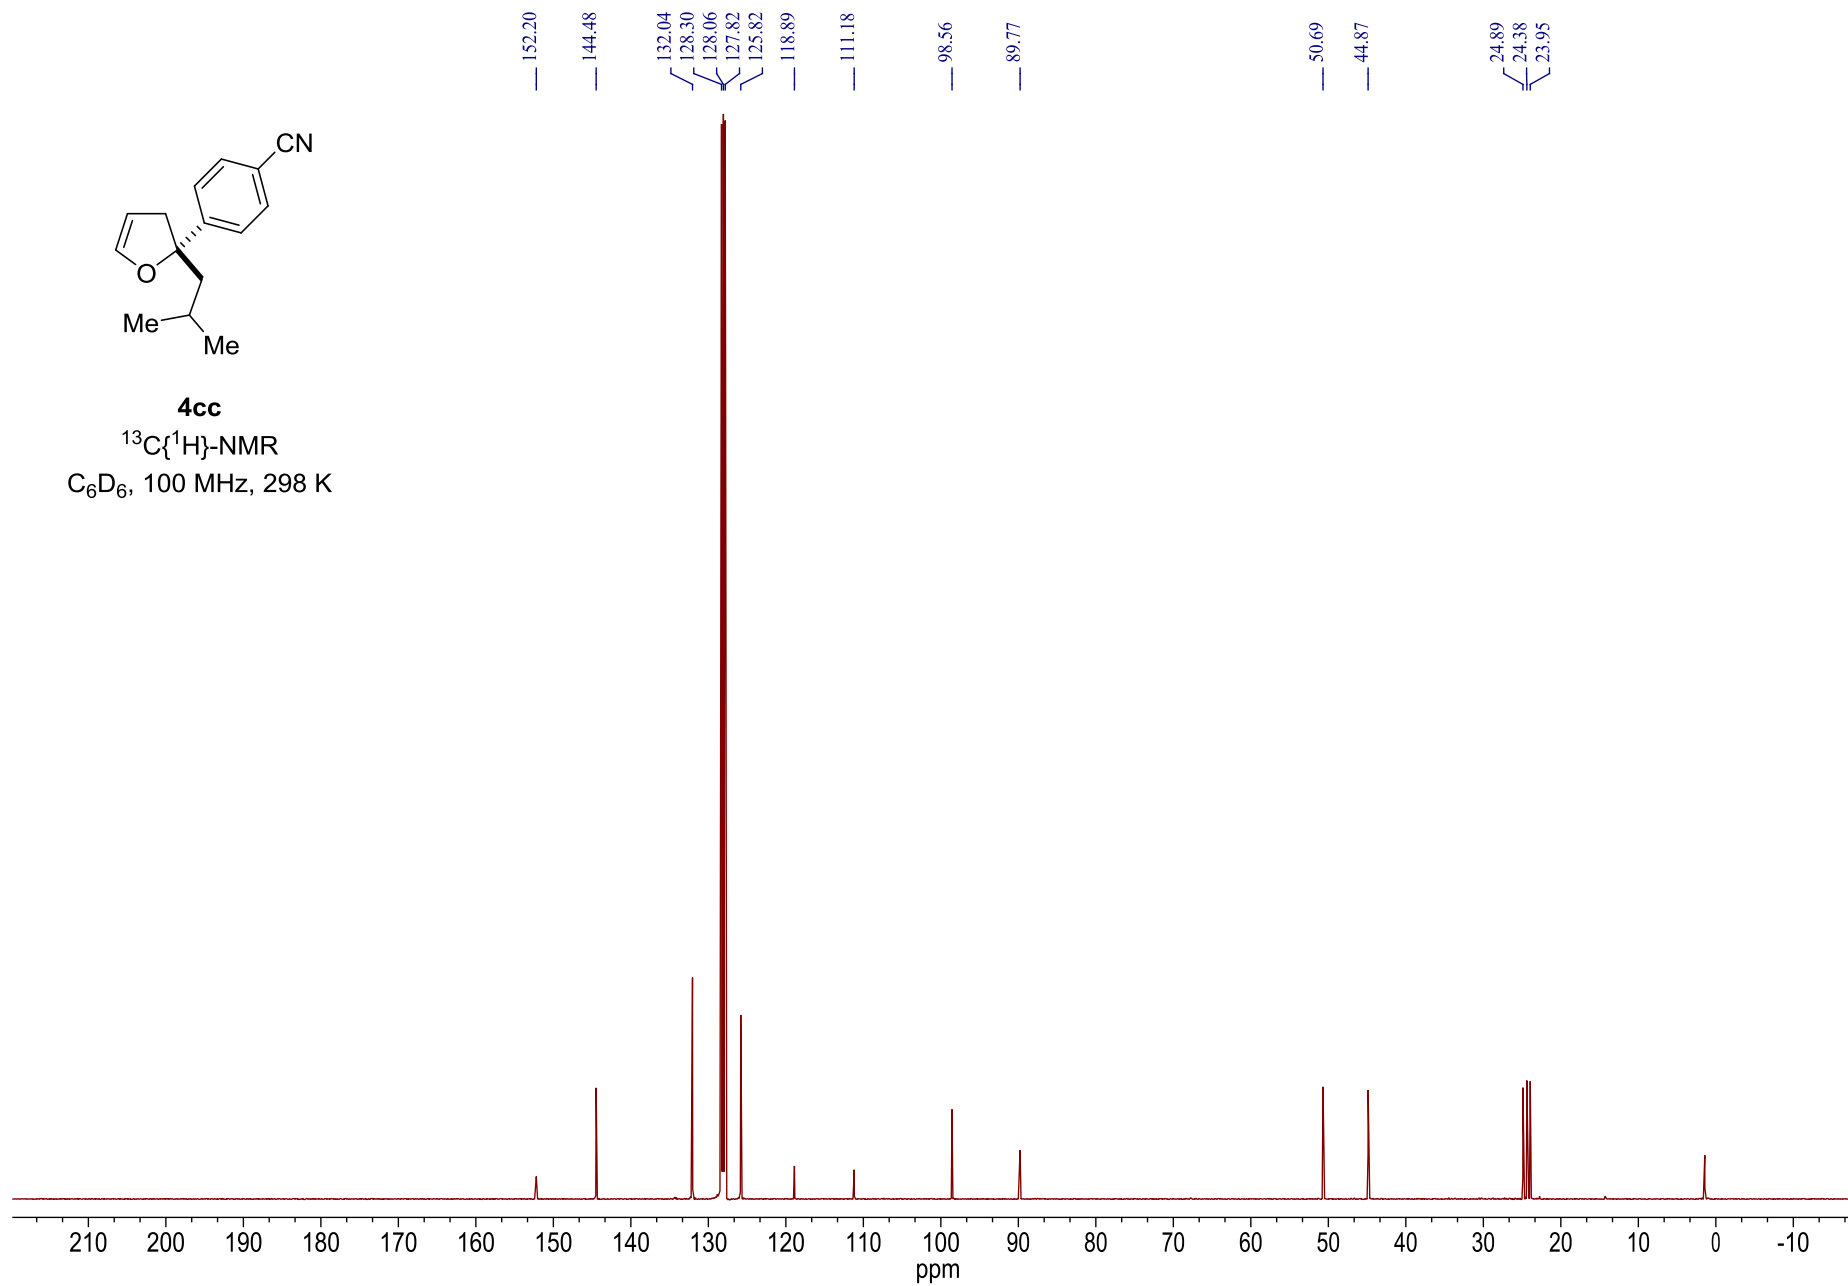

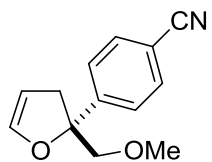**4dc**<sup>1</sup>H-NMRC<sub>6</sub>D<sub>6</sub>, 400 MHz, 298 K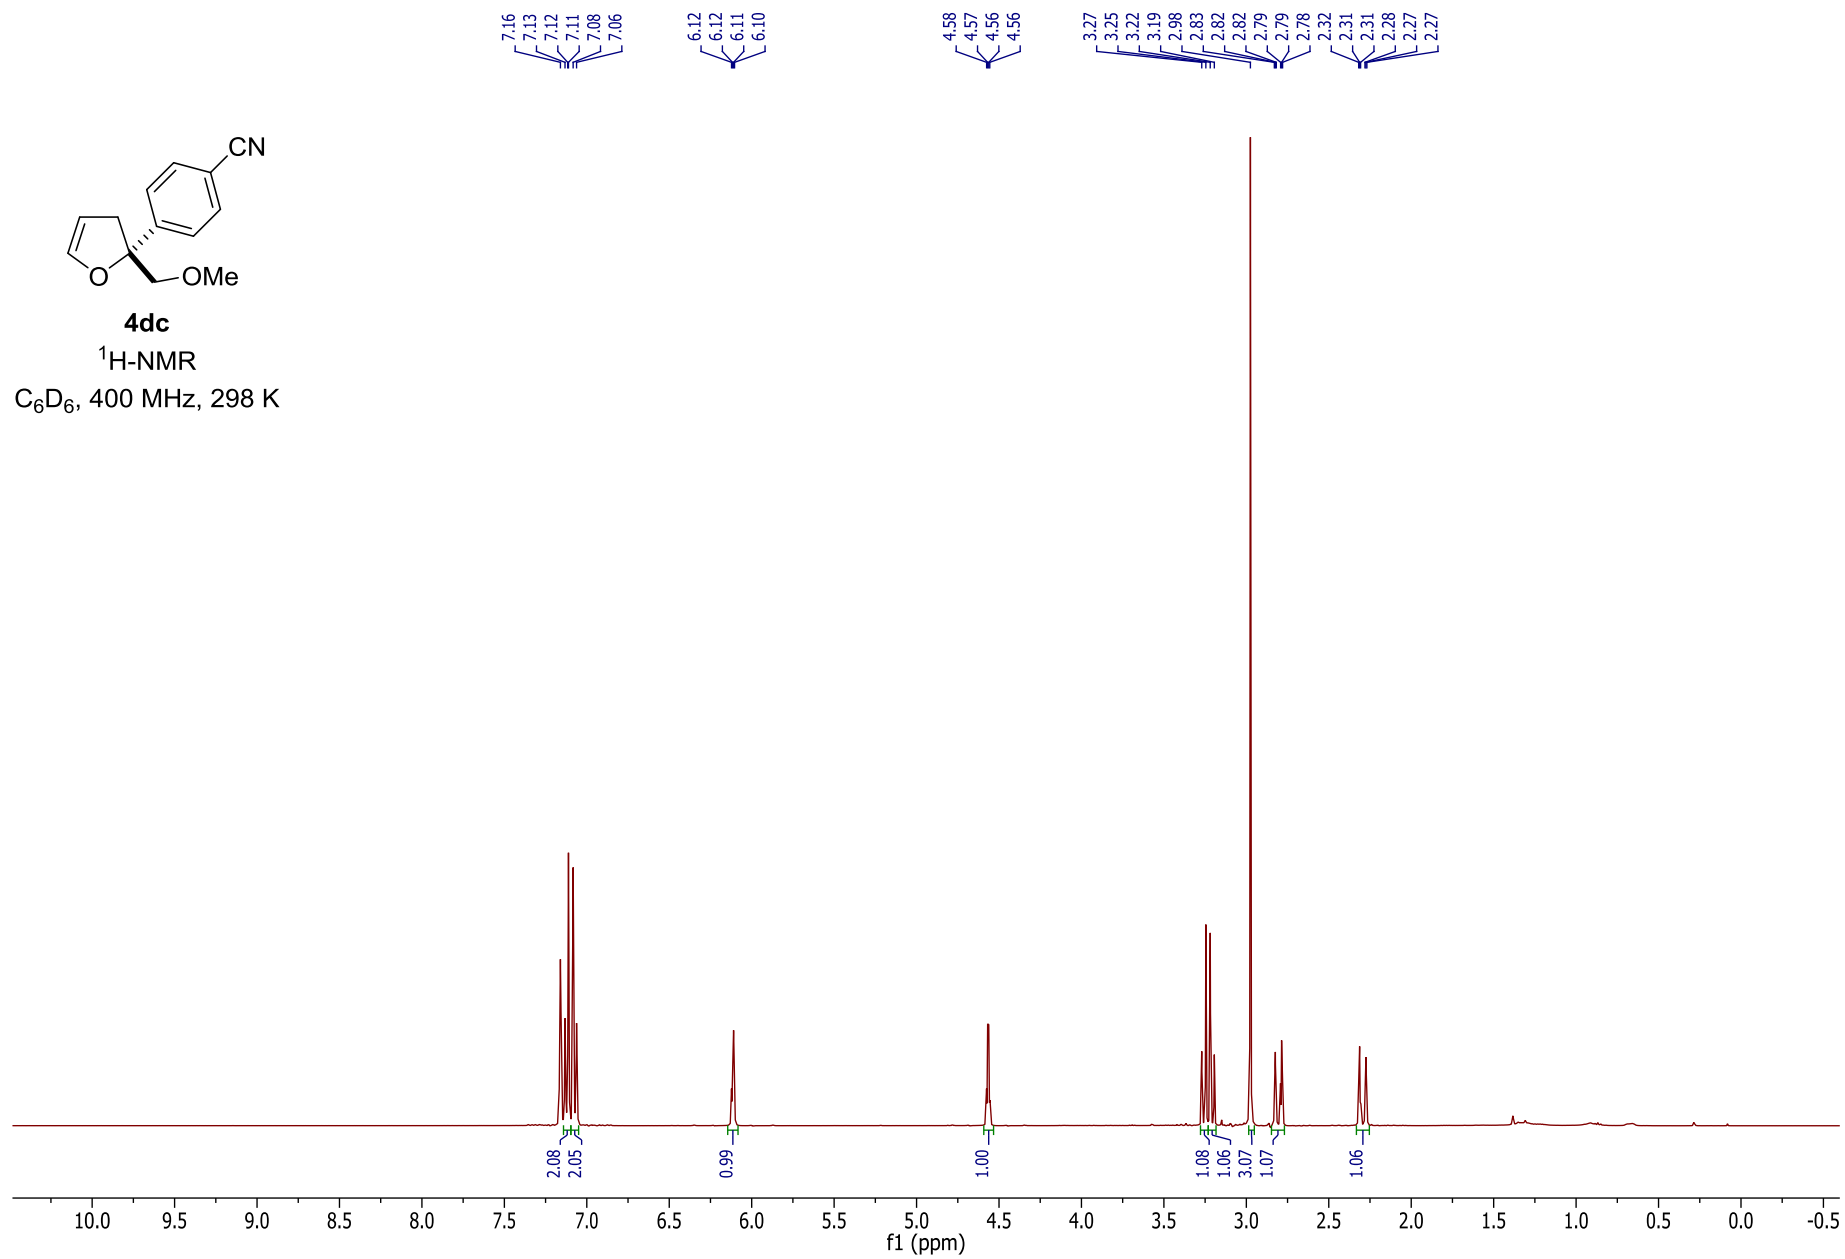

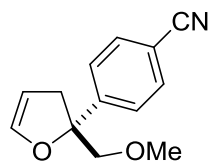**4dc** $^{13}\text{C}\{^1\text{H}\}$ -NMR $\text{C}_6\text{D}_6$ , 100 MHz, 298 K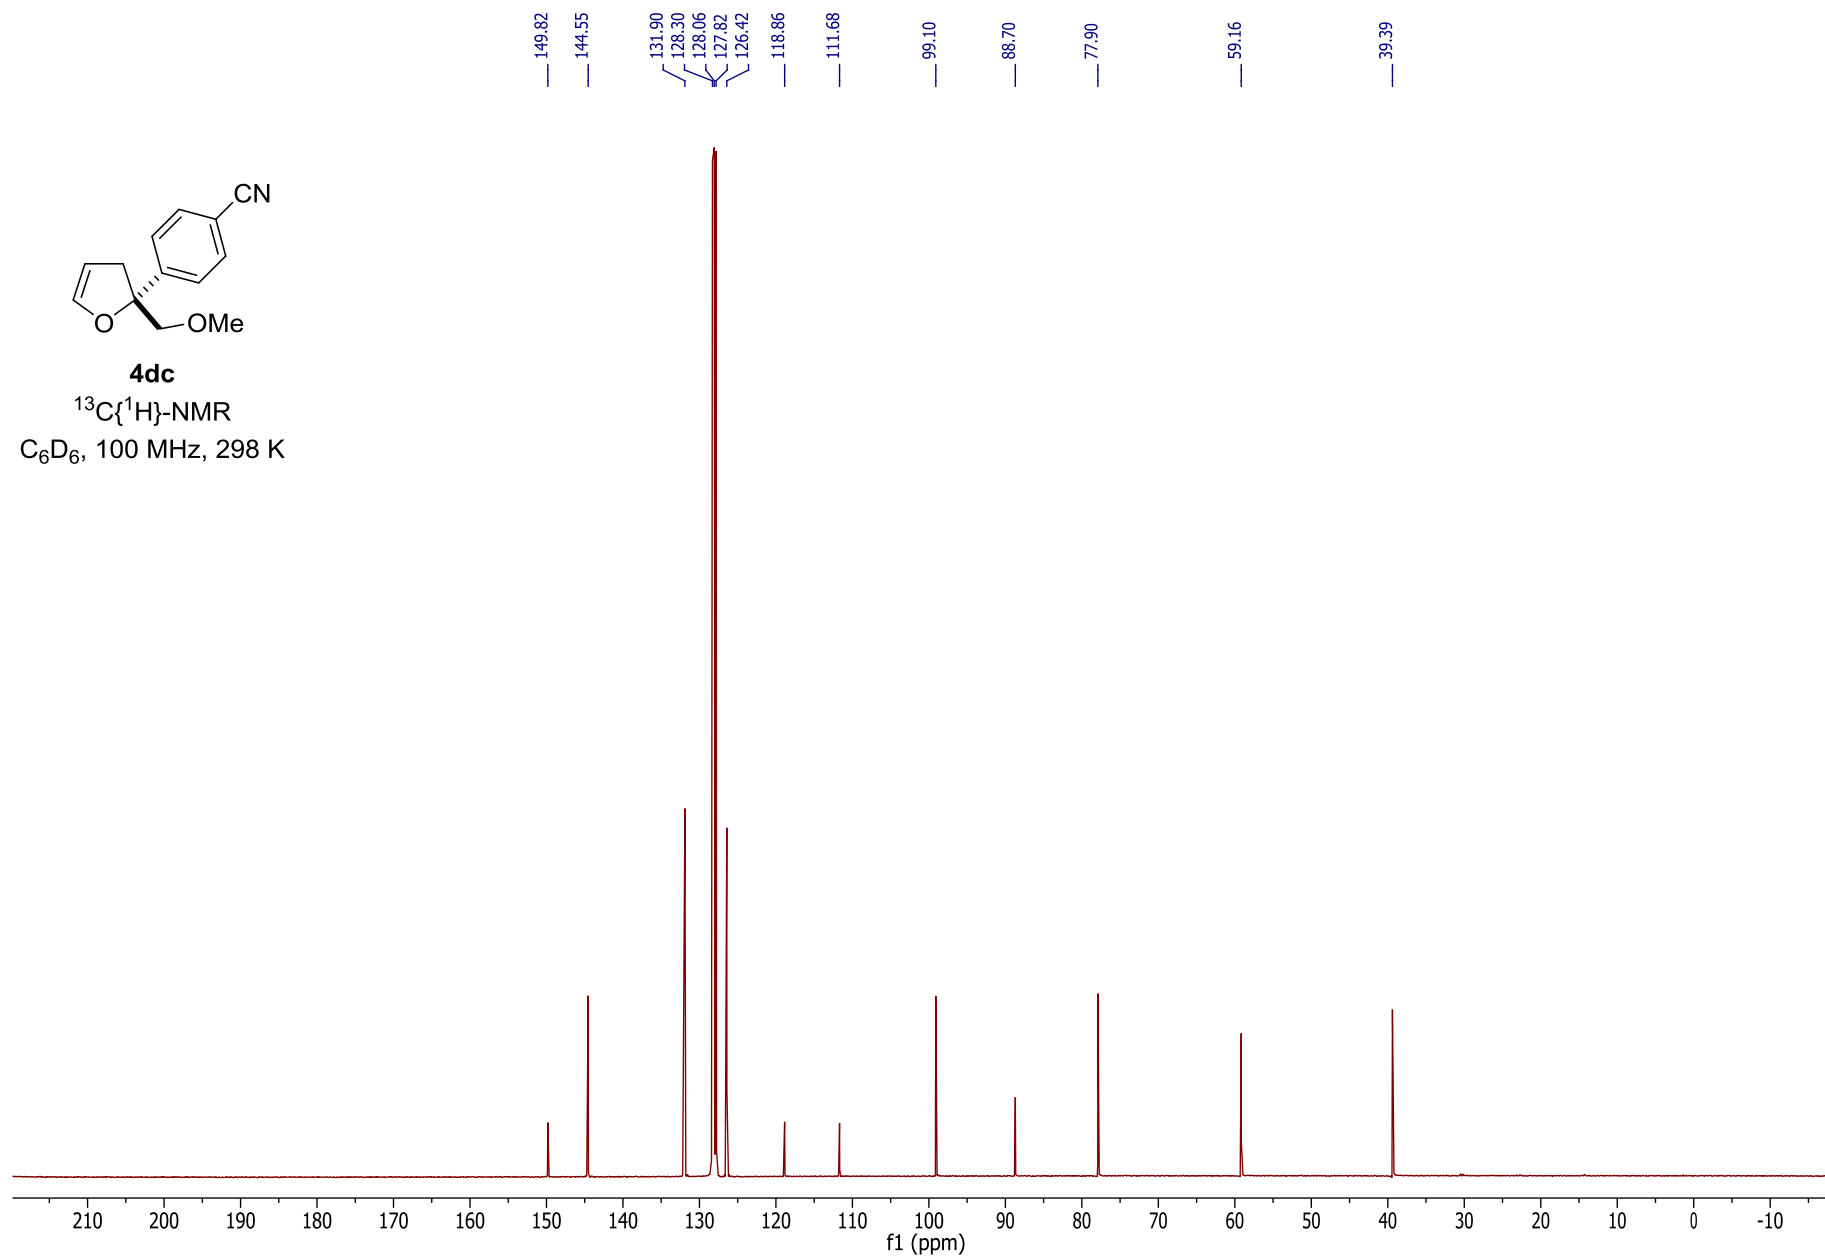

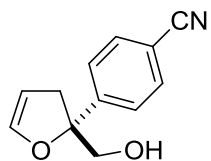**4ec**<sup>1</sup>H-NMRC<sub>6</sub>D<sub>6</sub>, 400 MHz, 298 K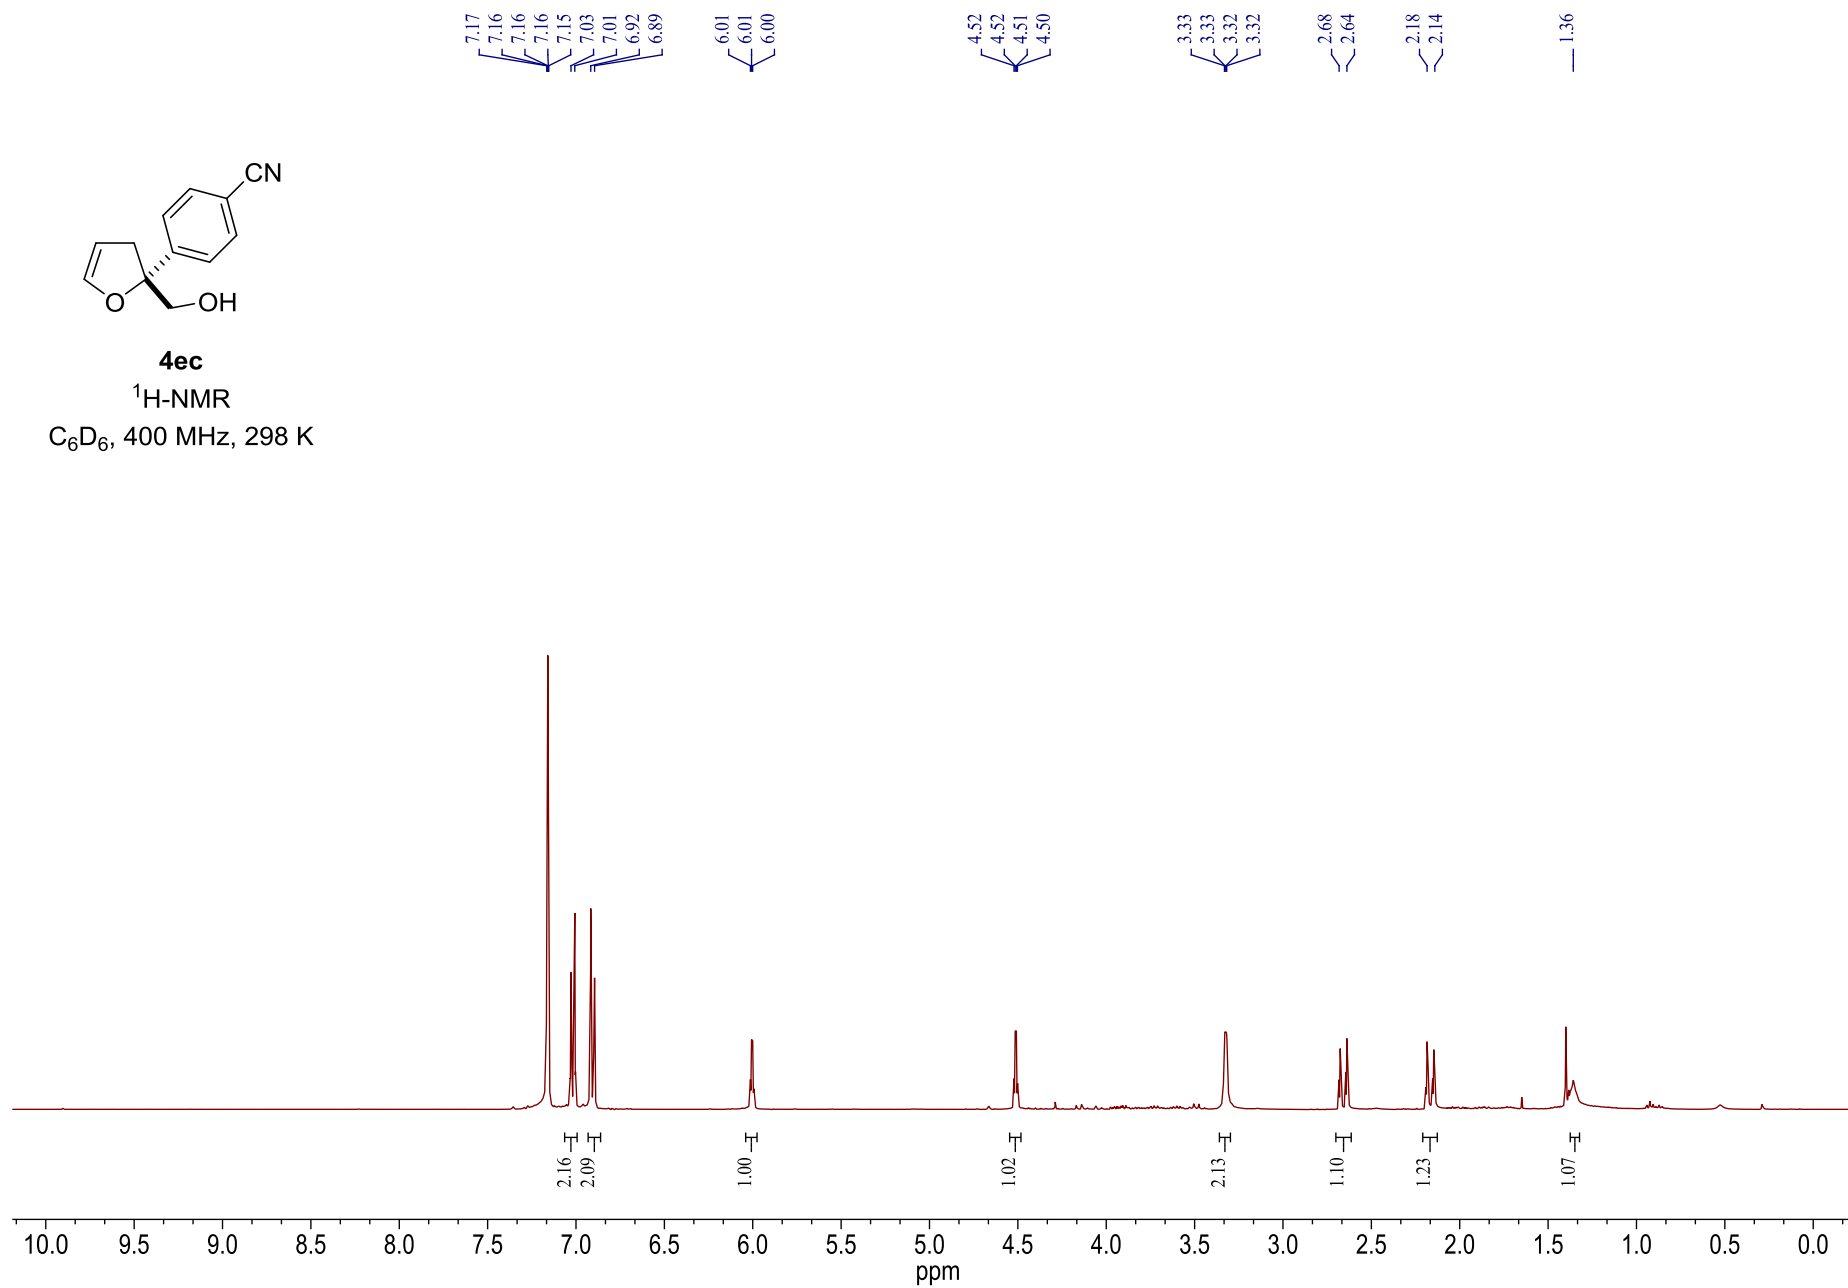

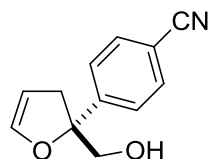**4ec**

$^{13}\text{C}\{^1\text{H}\}$ -NMR  
 $\text{C}_6\text{D}_6$ , 100 MHz, 298 K

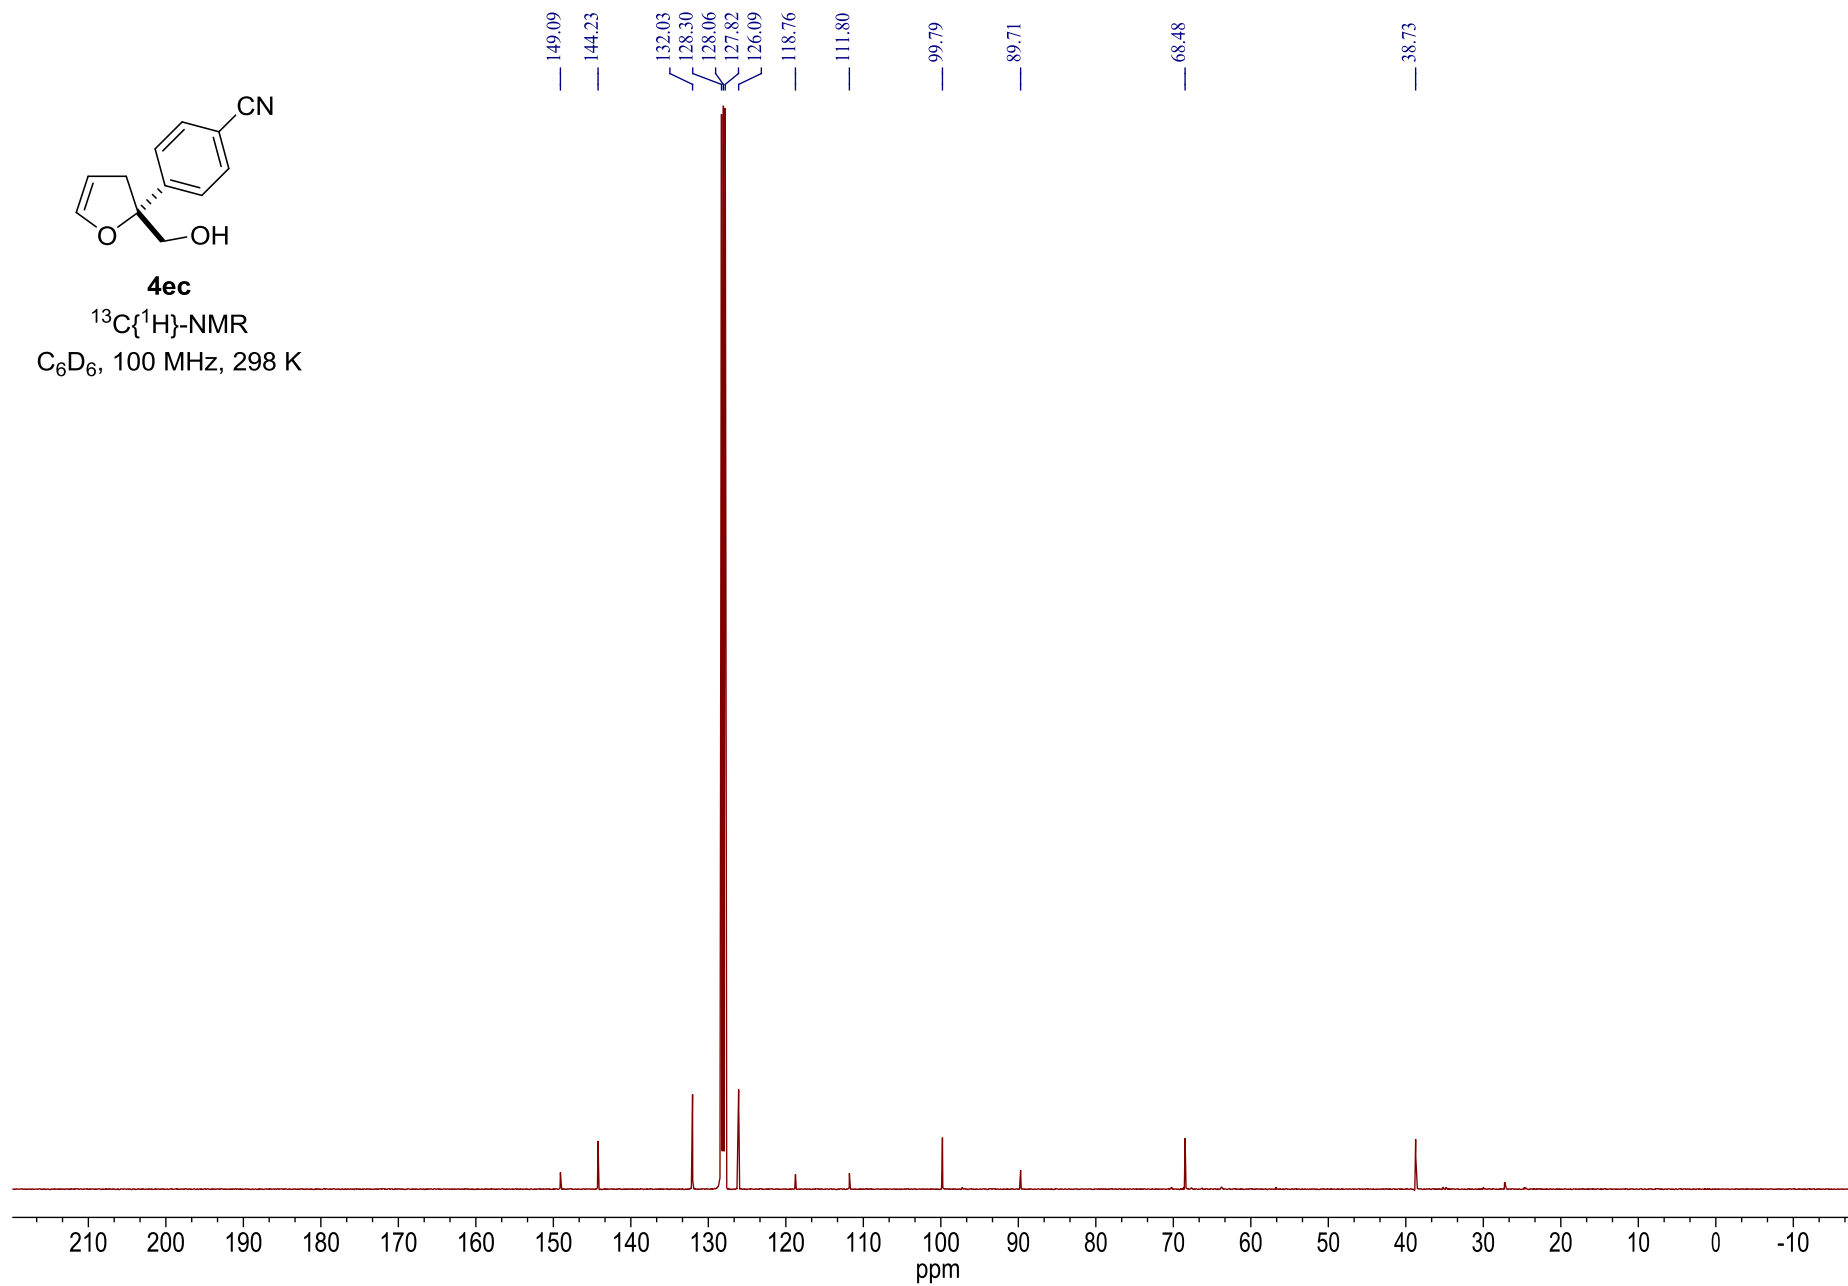



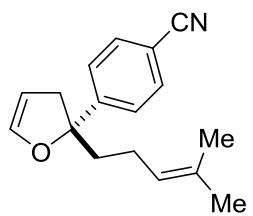**4fc** $^1\text{H-NMR}$  $\text{C}_6\text{D}_6$ , 400 MHz, 298 K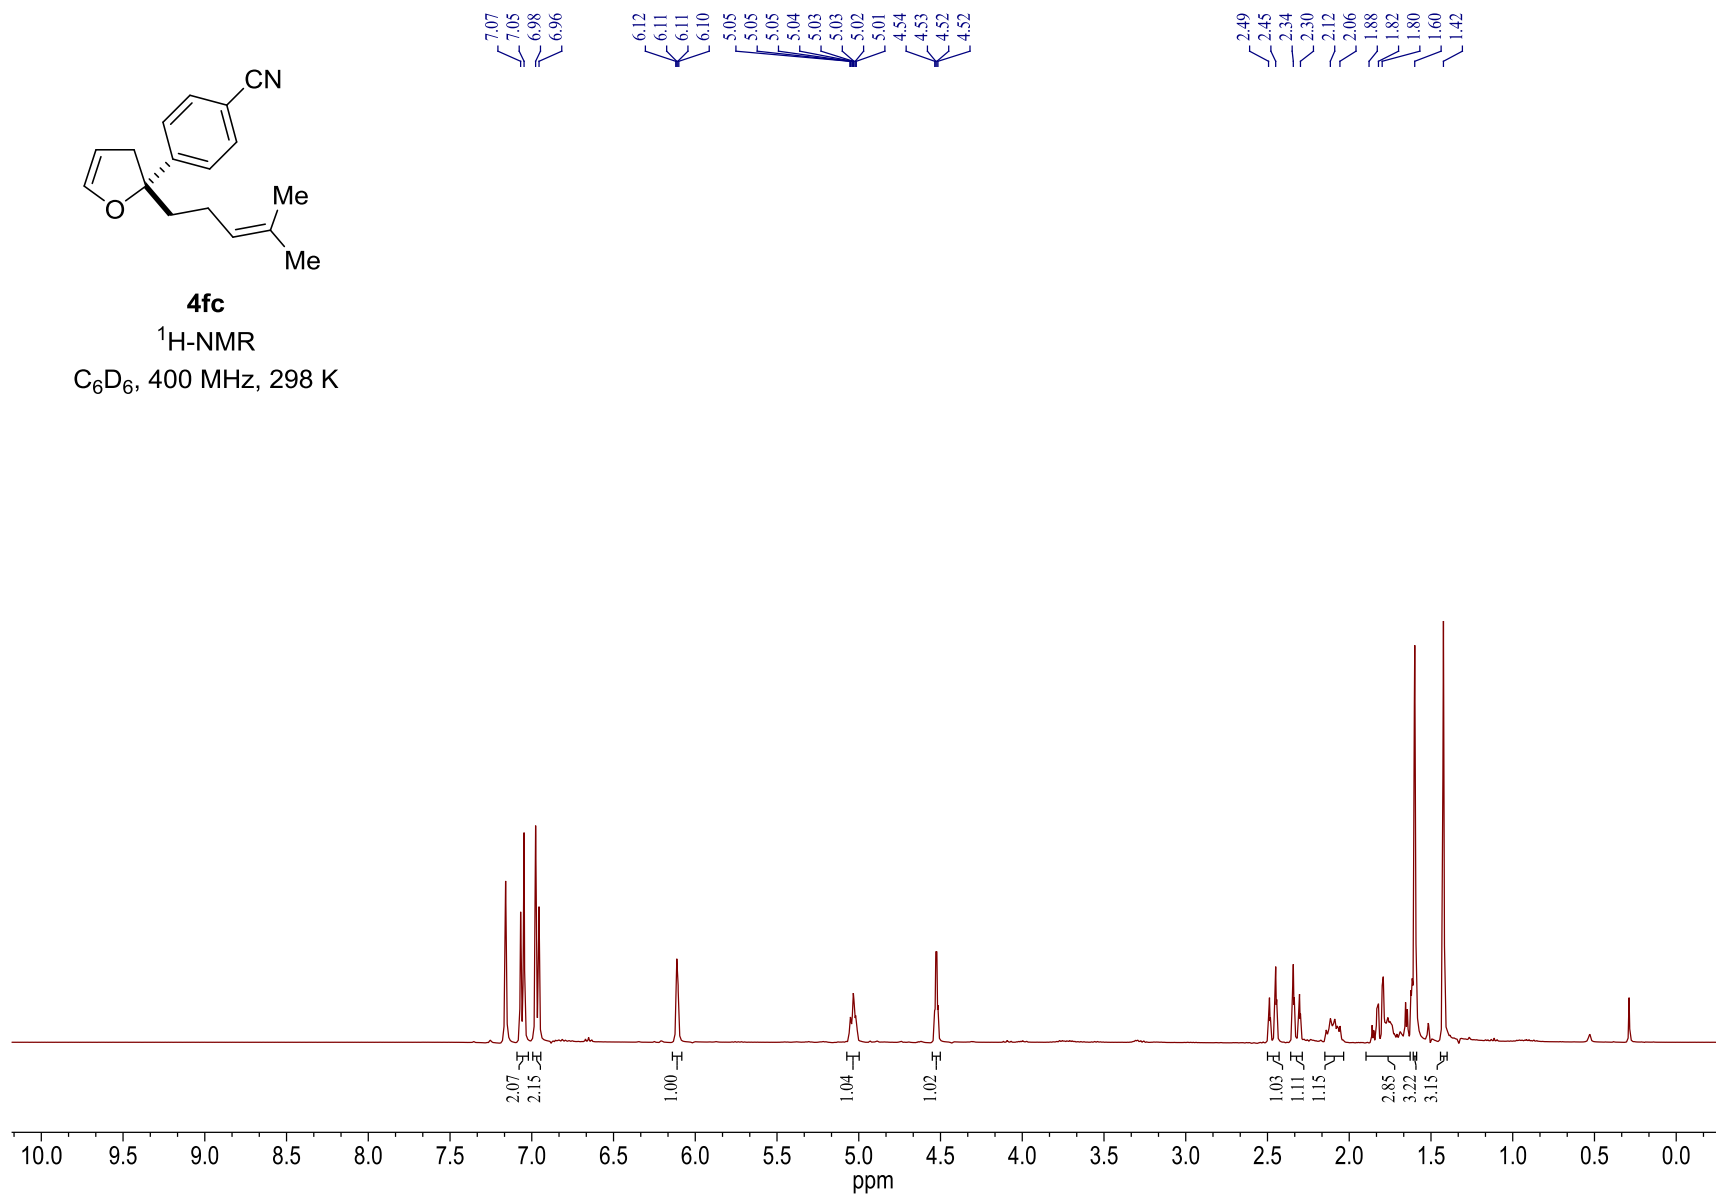

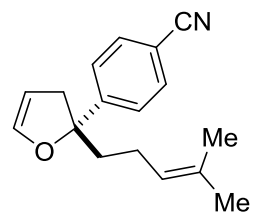**4fc**

$^{13}\text{C}\{^1\text{H}\}$ -NMR  
 $\text{C}_6\text{D}_6$ , 100 MHz, 298 K

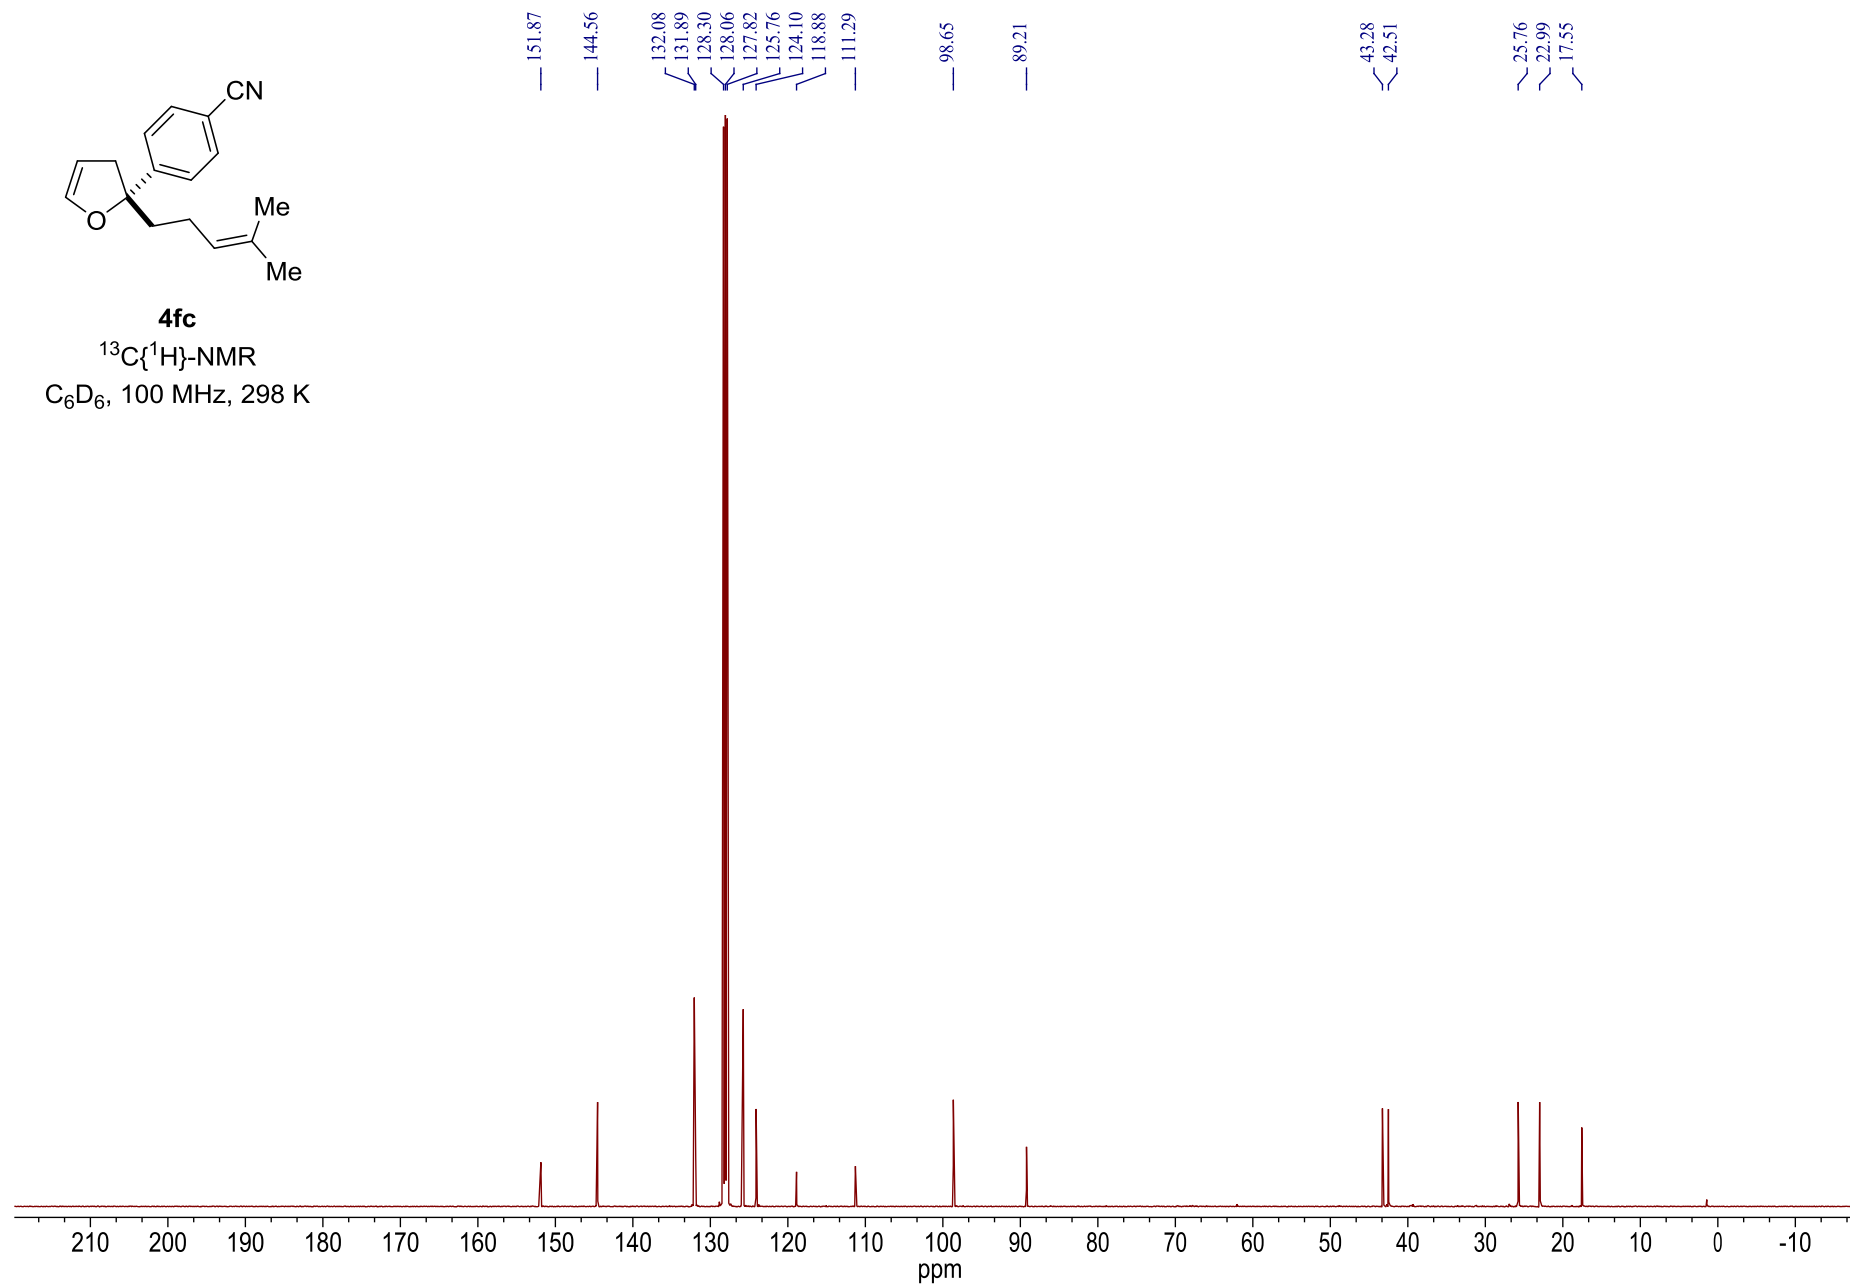

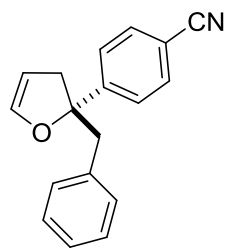**4gc**<sup>1</sup>H-NMRC<sub>6</sub>D<sub>6</sub>, 400 MHz, 298 K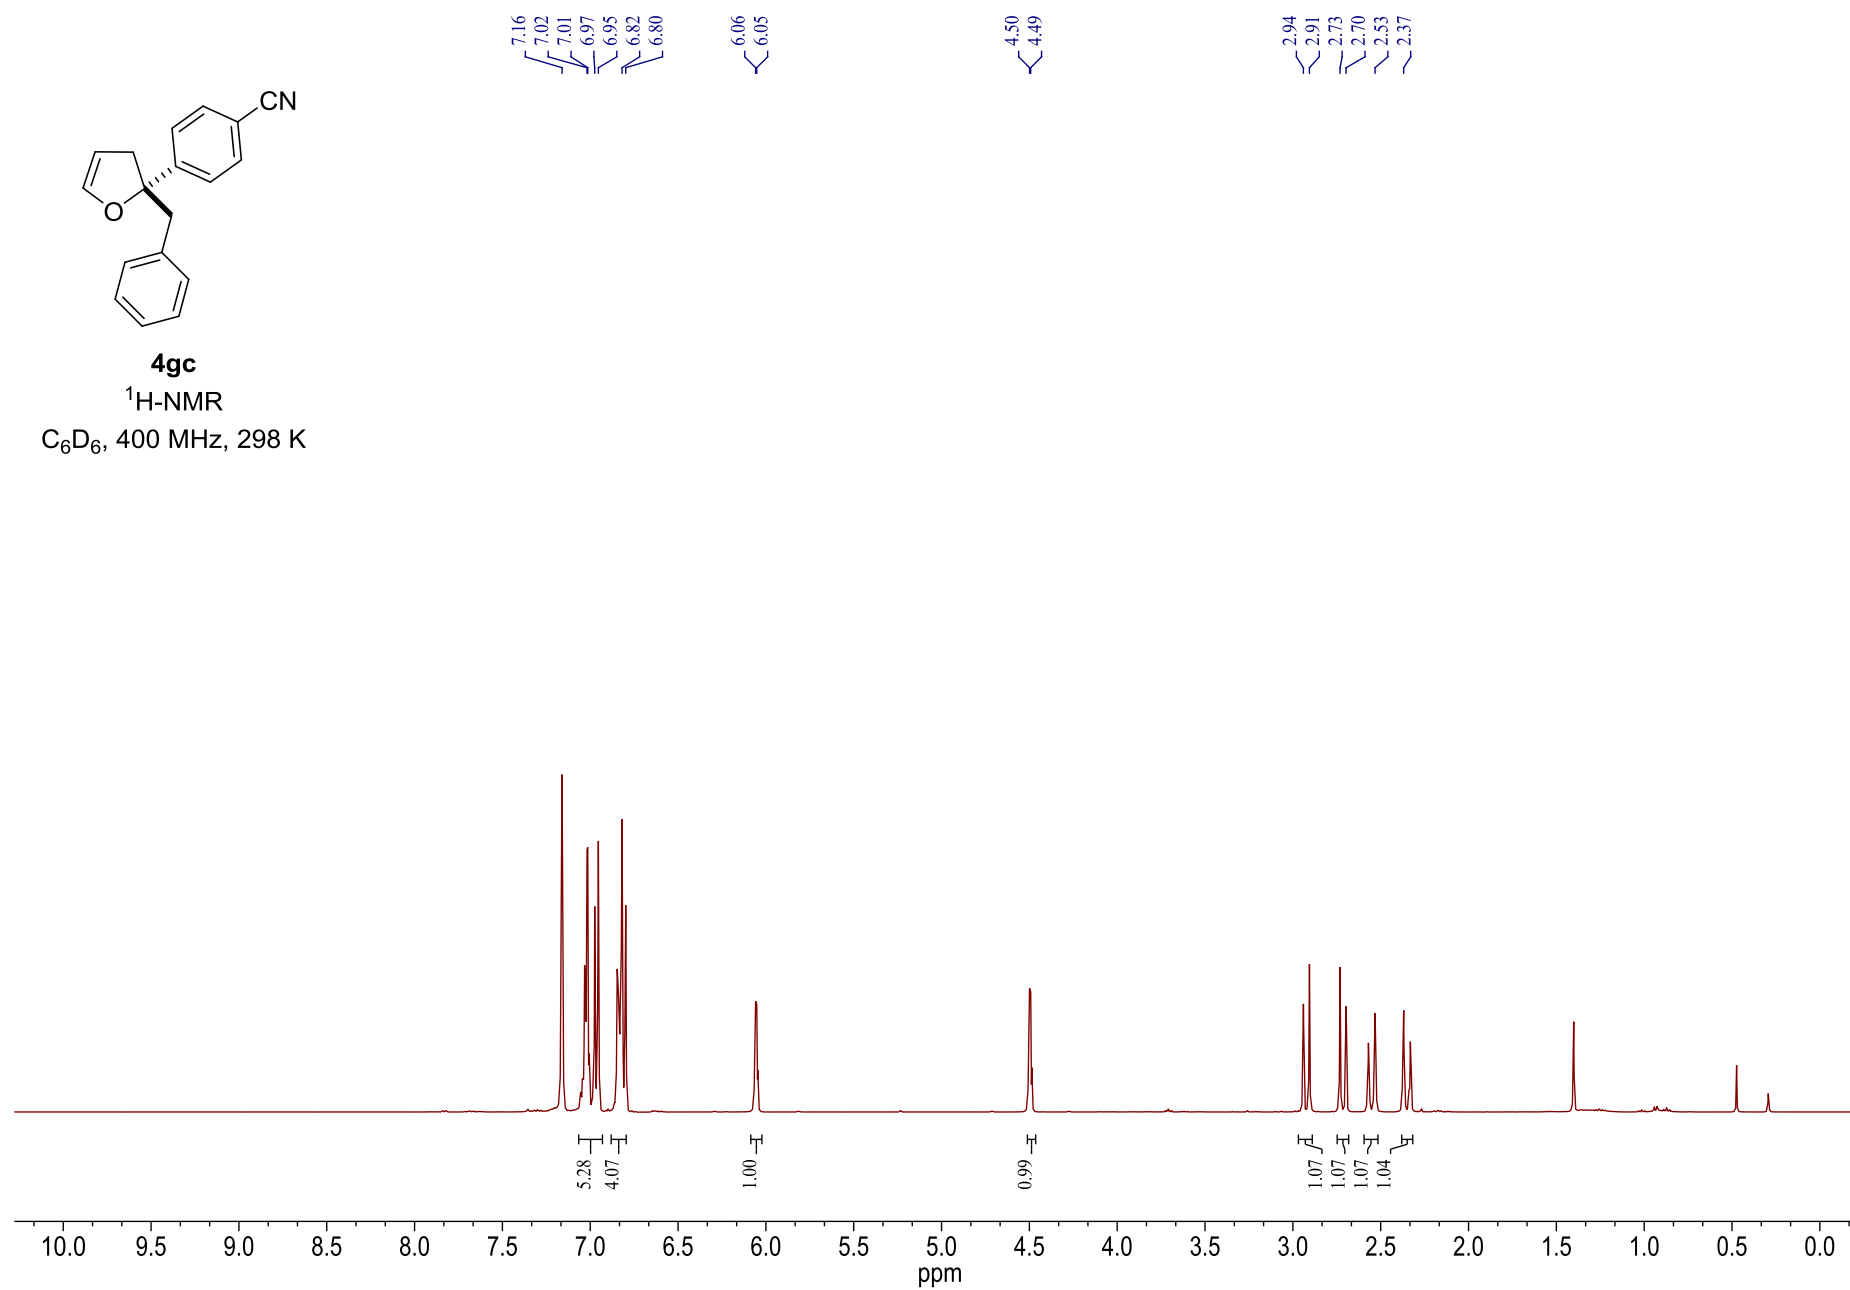

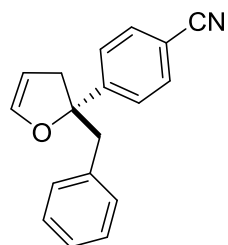**4gc**

$^{13}\text{C}\{^1\text{H}\}$ -NMR  
 $\text{C}_6\text{D}_6$ , 100 MHz, 298 K

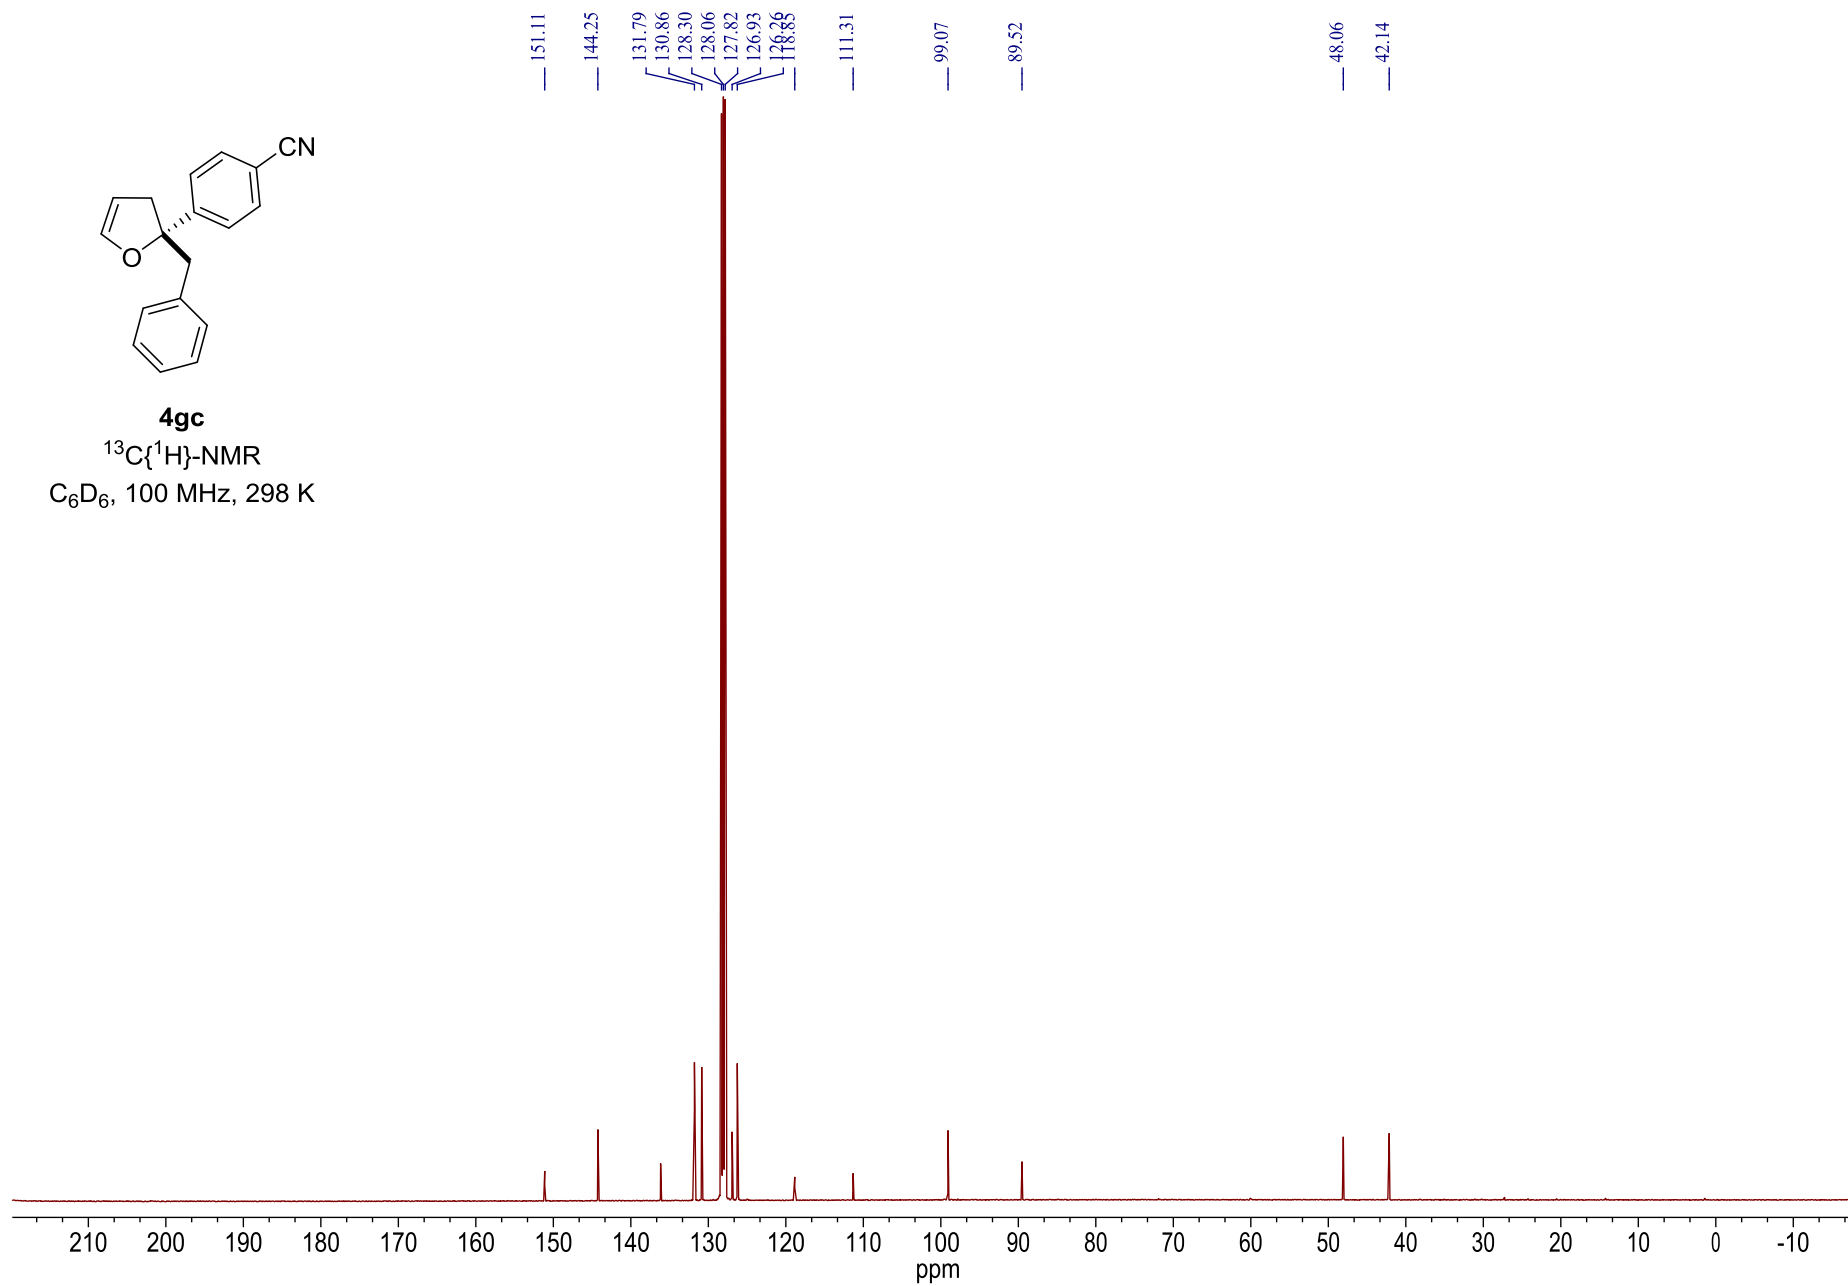

Supplement: c5sc01460c1.pdf [file c5sc01460c1.pdf]
